# Supplementary material for: A novel MOF-based electrochemical sensor for simultaneous quantification of nitrophenols in binary mixtures using artificial neural networks: challenges and opportunities
Source: RSC Adv. 2025 Oct 29;15(49):41400–17. doi: 10.1039/d5ra03838c (PMC12570034; doi:10.1039/d5ra03838c)
Supplement: RA-015-D5RA03838C-s001 [file RA-015-D5RA03838C-s001.xlsx]

## Sheet: Sheet1
4NP Conc (ppm)	10	30	60	100	10	30	60	100	10	30	60	100	10	30	60	100	10	30	60	100	0	0	0	0
2-NP Conc (ppm)	10	10	10	10	30	30	30	30	60	60	60	60	100	100	100	100	0	0	0	0	10	30	60	100
Potential [mV]	di [µA/]	di [µA/]	di [µA/]	di [µA/]	di [µA/]	di [µA/]	di [µA/]	di [µA/]	di [µA/]	di [µA/]	di [µA/]	di [µA/]	di [µA/]	di [µA/]	di [µA/]	di [µA/]	di [µA/]	di [µA/]	di [µA/]	di [µA/]	di [µA/]	di [µA/]	di [µA/]	di [µA/]
200	134.362	117.13	70.215	144.26	116.26	102.498	114.548	150.669	134.723	193.026	169.739	116.187	206.41	131.586	241.895	212.943	121.219	85.0458	265.845	157.39	113.792	142.726	104.838	156.134
200.45	114.032	99.7751	66.5348	123.931	99.7321	87.7267	98.0759	128.025	112.751	148.704	134.704	109.643	172.842	124.293	197.981	179.881	102.305	80.657	215.837	148.014	95.4715	115.895	87.97	129.065
200.9	97.0256	85.7642	63.2269	107.486	86.3342	75.7021	84.7535	109.87	95.3881	118.358	106.536	103.805	145.076	117.788	161.417	153.268	87.074	76.7323	174.324	139.574	80.7866	94.8335	74.6741	107.678
201.35	83.6592	75.2775	60.4486	95.2147	76.2816	66.6606	74.7707	96.3699	82.3558	99.4261	88.3439	98.8256	123.713	112.196	132.764	132.917	75.7413	73.2043	142.142	132.342	69.5418	79.5883	64.8905	91.4049
201.8	73.4328	68.0423	58.0656	86.5882	69.1602	60.2794	67.7583	87.0271	73.0188	88.9674	77.8403	94.706	107.869	107.469	114.211	117.966	67.8549	70.2045	121.6	126.292	61.3762	69.3716	58.1794	79.5826
202.25	65.8946	63.3968	56.2783	80.9539	64.486	56.0947	63.1902	81.0533	66.6252	85.1672	72.3924	91.251	96.3785	103.371	103.673	107.405	62.7312	67.6149	110.174	121.281	55.585	63.2428	53.968	71.3749
202.7	60.8827	60.0594	54.7378	76.8314	61.0492	53.0634	59.8758	76.6669	61.4164	82.0708	70.019	88.3105	88.7025	99.8555	97.5088	98.9021	59.019	65.3179	103.693	117.125	50.9003	58.9138	50.8898	64.6906
203.15	57.5645	57.5014	53.3349	73.5686	58.4051	50.7109	57.269	73.298	57.6592	79.4009	68.0003	85.7276	83.5721	96.7658	94.1781	92.7858	56.1779	63.3614	100.055	113.573	47.5189	55.6309	48.5364	60.1378
203.6	55.6051	55.2848	52.0927	70.9312	56.2841	48.7936	55.1643	70.5353	55.0486	77.0791	66.2082	83.4191	80.3247	94.1332	91.3963	88.4988	53.8666	61.6153	96.7514	110.655	45.067	52.9802	46.6258	57.0414
204.05	54.58	53.4028	50.8066	68.6945	54.4863	47.19	53.4373	68.3464	53.2871	74.9275	64.7231	81.4473	78.503	91.9309	88.8823	85.6224	51.977	60.0651	93.8233	108.102	43.4251	50.8008	45.0661	55.0916
204.5	53.5855	51.7906	49.7346	66.7686	52.9515	45.8225	51.9273	66.564	52.2066	72.9451	63.3442	79.6859	76.9883	89.9352	86.6284	83.8103	50.4021	58.647	91.2625	105.733	42.3732	48.9782	43.7111	53.9412
204.95	52.6665	50.3944	48.8204	65.098	51.4702	44.6195	50.6364	64.9632	51.2838	71.2363	62.1135	78.0851	75.5978	88.1661	84.6795	82.2095	49.0317	57.3857	89.0793	103.572	41.459	47.4395	42.5109	52.8291
205.4	51.7246	49.2517	47.976	63.5508	50.1525	43.5705	49.4774	63.545	50.3696	69.7837	61.0329	76.7042	74.4121	86.4916	82.7909	80.7454	47.8957	56.2726	87.2672	101.135	40.5822	46.226	41.438	51.8996
205.85	50.8668	48.2629	47.2387	62.1804	48.9514	42.6448	48.4236	62.0896	49.6275	68.5138	60.0518	75.376	73.3563	84.976	81.2226	79.4172	46.8409	55.2781	85.631	98.9164	39.8344	45.1694	40.4473	51.0705
206.3	50.184	47.3229	46.468	60.9201	47.8613	41.8253	47.4941	60.7145	48.9791	67.3978	59.2275	74.1481	72.5454	83.6247	79.8092	78.2237	45.7316	54.4012	84.0704	96.8031	39.076	44.2169	39.6029	50.3762
206.75	49.5969	46.4584	45.745	59.7458	46.9442	41.11	46.6258	59.479	48.2964	66.2876	58.4328	73.057	71.876	82.3252	78.3997	77.0399	44.6998	53.6027	82.5671	94.8016	38.4411	43.385	38.8389	49.7556
207.2	49.1063	45.6466	45.1244	58.6853	46.0902	40.4358	45.8005	58.3573	47.7465	65.2395	57.6401	71.9009	71.0422	81.0409	77.1518	75.8771	43.6862	52.7841	81.0658	93.2706	38.006	42.5377	38.1724	49.0767
207.65	48.6339	44.8968	44.5774	57.6984	45.3377	39.7282	45.0173	57.3828	47.0398	64.2632	56.9324	70.9427	70.3689	79.7958	75.9211	74.6597	42.8705	51.9608	79.6734	91.8209	37.5221	41.7947	37.6148	48.4188
208.1	48.0277	44.259	44.1528	56.833	44.6434	39.0378	44.2743	56.4782	46.4144	63.3547	56.2257	70.1289	69.2979	78.503	74.8519	73.4892	42.4029	51.1365	78.3825	90.638	37.1453	41.1454	37.0526	47.8326
208.55	47.4166	43.6814	43.7388	56.0354	43.9979	38.3655	43.625	55.6635	45.8904	62.5008	55.5592	69.2931	68.1877	77.3181	73.9052	72.5425	41.9745	50.2433	77.3488	89.5441	36.6356	40.5123	36.5505	47.2617
209	46.8428	43.1449	43.3381	55.28	43.3888	37.7793	43.0818	54.9147	45.3673	61.6277	54.9883	68.6869	67.3041	76.3236	73.0303	71.6905	41.6168	49.4563	76.4814	88.4893	36.038	39.9606	36.0724	46.7405
209.45	46.3408	42.6372	42.8906	54.5618	42.8351	37.3767	42.5855	54.2367	45.024	60.7919	54.3993	67.9955	66.3785	75.4056	72.1247	71.0077	41.1731	48.9514	75.6935	87.534	35.491	39.4021	35.5847	46.2528
209.9	45.9487	42.1839	42.4048	53.8456	42.3283	36.999	42.1629	53.6381	44.6415	59.9887	53.815	67.2372	65.7483	74.6502	71.1847	70.3058	40.5802	48.7095	74.9724	86.5404	34.9526	38.8589	35.1391	45.7039
210.35	45.5452	41.7507	41.9439	53.2183	41.8425	36.6949	41.7593	53.0643	44.2504	59.2686	53.2221	66.628	65.1831	74.0047	70.2341	69.5274	40.0275	48.5689	74.2227	85.6453	34.5586	38.3818	34.7116	45.2133
210.8	45.1215	41.3405	41.5327	52.6732	41.3892	36.3851	41.3663	52.4992	43.7761	58.6614	52.6082	65.9299	64.6266	73.363	69.2807	68.7825	39.5083	48.456	73.3477	84.713	34.2077	37.9342	34.3234	44.8289
211.25	44.7457	40.9551	41.2295	52.174	40.9044	36.0294	41.0239	51.912	43.2683	58.1555	51.9675	65.3361	64.0834	72.7242	68.5482	68.071	39.0798	48.1261	72.3953	83.7911	33.7907	37.5183	34.0011	44.3843
211.7	44.4043	40.5879	40.9379	51.7112	40.4291	35.7262	40.6481	51.3144	42.7825	57.706	51.4377	64.7528	63.5871	72.0893	67.8243	67.4925	38.7279	47.6098	71.4515	82.9535	33.435	37.1491	33.7171	44.0524
212.15	44.1318	40.2474	40.6366	51.212	39.9893	35.3877	40.2781	50.7148	42.3579	57.2489	50.9672	64.1236	63.1195	71.3874	67.219	66.935	38.4286	47.1278	70.4837	82.0517	33.1013	36.7724	33.4417	43.6872
212.6	43.9348	39.9654	40.2953	50.6918	39.5656	35.0721	39.9252	50.14	42.0711	56.6838	50.5589	63.5785	62.6987	70.6501	66.6376	66.4387	38.093	46.7692	69.691	81.3852	32.8115	36.3908	33.1625	43.2224
213.05	43.6145	39.6756	39.8917	50.1831	39.1888	34.7671	39.557	49.681	41.7392	56.1148	50.2902	62.9674	62.2923	69.9922	65.9596	65.906	37.7688	46.4928	69.0904	80.7493	32.7503	36.0666	32.866	42.8781
213.5	43.3123	39.3419	39.5236	49.6705	38.8417	34.4773	39.2329	49.2813	41.4667	55.6376	49.9794	62.43	61.8467	69.3821	65.3925	65.4002	37.4504	46.271	68.6611	80.2157	32.7006	35.752	32.5571	42.5301
213.95	42.9632	39.0024	39.2405	49.1733	38.4927	34.2316	38.9049	48.9074	41.1463	55.2322	49.7451	61.9911	61.4699	68.7959	64.8255	64.9842	37.1176	46.0195	68.2986	79.8484	32.6107	35.5101	32.2836	42.2441
214.4	42.6075	38.5931	38.9642	48.7267	38.1685	34.0021	38.5166	48.5766	40.8929	54.9969	49.5137	61.4537	61.0023	68.2699	64.3693	64.6199	36.8307	45.5586	67.9314	79.2775	32.538	35.3198	32.0417	42.0041
214.85	42.3455	38.2154	38.7385	48.2753	37.851	33.8118	38.1561	48.2103	40.7772	54.6747	49.2182	61.0253	60.6293	67.7526	63.9409	64.3349	36.5849	45.0977	67.5269	78.7602	32.3668	35.1085	31.7759	41.7297
215.3	42.0615	37.8922	38.553	47.8603	37.5183	33.6196	37.787	47.8546	40.5735	54.208	48.8778	60.5768	60.3128	67.218	63.4809	63.9983	36.3076	44.6855	67.0058	78.0793	32.1957	34.9153	31.5353	41.4112
215.75	41.9257	37.612	38.3062	47.4998	37.2123	33.3805	37.4733	47.5457	40.4664	53.7767	48.4972	60.048	59.9753	66.6567	63.0803	63.5288	36.0666	44.3881	66.5267	77.431	32.145	34.6284	31.3115	41.0717
216.2	41.7516	37.4284	38.0566	47.1202	36.9043	33.0926	37.2591	47.2406	40.236	53.3464	48.0716	59.632	59.7572	65.972	62.628	62.9971	35.8142	44.2475	66.0399	76.8429	32.0322	34.4324	31.0326	40.7973
216.65	41.5575	37.283	37.7793	46.7099	36.627	32.7407	37.0382	46.9528	39.9539	53.0251	47.649	59.1997	59.4885	65.2806	62.2483	62.453	35.4814	43.9568	65.5408	76.2672	31.9155	34.2708	30.8094	40.5697
217.1	41.4026	37.1185	37.4226	46.3322	36.3774	32.3898	36.8565	46.6602	39.799	52.7832	47.3745	58.8029	59.1825	64.6744	61.9289	61.9308	35.2089	43.5963	65.0951	75.8092	31.7328	34.0833	30.6086	40.3364
217.55	41.1138	36.9388	37.0698	45.9325	36.1183	32.1335	36.6567	46.3465	39.6192	52.5097	47.0723	58.3209	58.8832	64.1666	61.5149	61.5942	34.921	43.0857	64.6313	75.2258	31.4995	33.9925	30.3592	40.1117
218	40.9723	36.7207	36.7599	45.5634	35.8381	31.9853	36.474	46.0367	39.4279	52.1989	46.9021	57.75	58.5734	63.9763	61.118	61.25	34.7097	42.4517	64.1484	74.5918	31.3408	33.7095	30.2273	39.8688
218.45	40.8346	36.4606	36.4998	45.331	35.5331	31.9059	36.3086	45.7077	39.252	51.7906	46.8094	57.0682	58.2425	63.6808	60.6322	60.8694	34.5184	42.0778	63.7085	73.8756	31.1274	33.4331	30.1033	39.5848
218.9	40.6979	36.2044	36.3114	45.0737	35.2271	31.8438	36.1279	45.3597	39.033	51.3182	46.6095	56.4237	57.9862	63.2486	60.0422	60.4993	34.3454	41.723	63.174	72.8964	31.002	33.2093	29.9379	39.2673
219.35	40.5908	35.9423	36.1537	44.8299	34.9851	31.7395	35.9442	45.025	38.7002	50.731	46.4211	55.9484	57.7472	62.8326	59.4952	60.0384	34.1627	41.4591	62.473	71.9478	30.7093	32.9483	29.8452	38.9852
219.8	40.2513	35.6822	36.0035	44.5937	34.8273	31.5808	35.7281	44.7658	38.4325	50.0444	46.1027	55.5774	57.401	62.2827	58.8947	59.6807	33.9609	41.307	61.7291	71.1072	30.3193	32.8	29.6985	38.7279
220.25	39.9663	35.4613	35.8639	44.3087	34.7011	31.4115	35.5063	44.5794	38.0586	49.486	45.6322	55.368	57.0233	61.8773	58.3228	59.3097	33.8557	41.1215	60.944	70.2896	30.0202	32.6317	29.5582	38.486
220.7	39.6383	35.2424	35.7128	44.0371	34.5873	31.2375	35.2968	44.4455	37.6215	49.0413	45.1158	55.1165	56.6312	61.5914	57.8256	58.8985	33.7353	40.9867	60.2774	69.6317	29.6274	32.429	29.476	38.4306
221.15	39.2654	35.0817	35.5684	43.8134	34.4381	31.0549	35.0731	44.3355	37.4188	48.742	44.5842	54.8879	56.1617	61.272	57.3197	58.4596	33.6272	40.8318	59.8376	69.0388	29.4224	32.2846	29.352	38.3674
221.6	39.0225	34.9239	35.4212	43.5686	34.2842	30.8911	34.8627	44.1041	37.2161	48.609	44.1108	54.6546	55.7792	60.9172	56.8731	57.8638	33.5278	40.6147	59.5019	68.4555	29.2843	32.1402	29.2438	38.2317
222.05	38.7576	34.7604	35.2328	43.3056	34.1407	30.7397	34.6762	43.8096	37.1539	48.4627	43.7589	54.3046	55.5343	60.4907	56.4256	57.3723	33.3518	40.1719	59.1156	68.0156	29.1261	32.0054	29.1227	38.115
222.5	38.5625	34.6323	35.0434	43.0627	33.9925	30.6053	34.4974	43.4768	37.1424	48.2849	43.5609	53.9747	55.2121	60.0221	55.9628	56.9439	33.1577	39.7091	58.648	67.984	29.1051	31.9451	28.9808	37.8998
222.95	38.4917	34.4353	34.8637	42.7405	33.8376	30.4948	34.3951	43.1296	36.912	48.0774	43.4854	53.5989	54.9711	59.6042	55.5583	56.6016	32.9903	39.2405	58.2664	67.9477	29.0312	31.8266	28.8307	37.7066
223.4	38.4401	34.2564	34.6915	42.4297	33.6463	30.3825	34.2937	42.8408	36.7026	47.8632	43.4194	53.2403	54.8372	59.2303	55.1796	56.4007	32.8039	38.9249	57.8944	67.9831	28.9512	31.7246	28.6752	37.5651
223.85	38.3913	34.0919	34.5682	42.138	33.4474	30.2678	34.2029	42.6123	36.4788	47.649	43.3438	53.0165	54.5838	58.9874	54.8755	56.1588	32.6623	39.01	57.6315	67.9295	28.8716	31.6284	28.5376	37.4657
224.3	38.2919	33.9447	34.4678	41.8387	33.2791	30.1117	34.1149	42.4325	36.3028	47.4893	43.2568	52.8176	54.274	58.7981	54.6928	55.9446	32.5131	39.0732	57.4995	67.5881	28.6734	31.4385	28.4274	37.3624
224.75	38.1551	33.8548	34.3387	41.6245	33.0917	29.8841	33.9801	42.2547	36.1996	47.3544	43.1239	52.6063	53.8944	58.5954	54.5178	55.762	32.4108	39.1908	57.2853	67.3099	28.4674	31.3825	28.3054	37.2543
225.2	38.0069	33.7525	34.2383	41.4466	32.9215	29.6459	33.8204	42.0682	36.0791	47.2158	43.0388	52.4361	53.3665	58.3879	54.3524	55.5793	32.2942	39.1382	57.1638	67.0287	28.4118	31.3209	28.1962	37.1568
225.65	37.851	33.631	34.1436	41.2812	32.756	29.3993	33.6329	41.8301	35.949	47.079	42.9298	52.2917	52.94	58.1316	54.2166	55.4273	32.3018	38.835	57.0414	66.7657	28.3972	31.2631	28.0575	36.9808
226.1	37.7124	33.4838	34.0623	41.1243	32.5485	29.236	33.4713	41.6044	35.7912	46.8667	42.7605	52.2314	52.7392	57.8906	53.9718	55.2609	32.3831	38.6055	56.8751	66.52	28.4656	31.2513	27.8959	36.8699
226.55	37.5556	33.3193	33.96	40.9379	32.429	29.2396	33.3164	41.395	35.7004	46.7118	42.5501	52.2238	52.6789	57.7051	53.793	55.0792	32.3582	38.4325	56.571	66.2149	28.6132	31.0606	27.8441	36.7035
227	37.4169	33.1845	33.8032	40.7284	32.32	29.273	33.2026	41.2248	35.6373	46.5091	42.2594	52.0775	52.6866	57.5588	53.6811	54.8564	32.3582	38.3904	56.1512	65.8448	28.589	30.8645	27.7554	36.5496
227.45	37.2782	33.0515	33.6129	40.5133	32.2052	29.3267	33.1137	41.1119	35.6	46.3513	42.1016	51.781	52.7344	57.4058	53.4822	54.5791	32.0933	38.4038	55.7534	65.5876	28.4043	30.6867	27.7014	36.4664
227.9	37.1836	32.8871	33.3566	40.2962	32.1565	29.3342	32.9827	40.9714	35.5665	46.2509	42.0299	51.3708	52.7382	57.1906	53.2986	54.3534	31.8093	38.3349	55.4799	65.3074	28.1808	30.5069	27.6301	36.3048
228.35	37.0832	32.7226	33.2342	40.1011	32.0369	29.2496	32.8459	40.8356	35.469	46.0568	41.9955	50.9605	52.6799	56.9707	53.0232	54.0875	31.575	38.1618	55.3995	65.0511	27.8747	30.3753	27.5009	36.2722
228.8	36.9636	32.5552	33.1567	39.9204	31.8992	29.1482	32.7197	40.6787	35.3848	45.9248	42.0548	50.7358	52.6445	56.7106	52.6703	53.9785	31.3475	37.9562	55.5697	64.8389	27.6116	30.2483	27.4345	36.2235
229.25	36.89	32.4261	33.108	39.7483	31.7835	29.0604	32.5772	40.5133	35.2653	45.7412	41.9592	50.6842	52.5231	56.5174	52.4447	54.0082	31.2451	37.7956	55.7113	64.6839	27.6565	30.1027	27.375	36.1393
229.7	36.7533	32.3955	33.1376	39.6154	31.6104	28.9984	32.4586	40.323	35.2844	45.5901	41.7957	50.6861	52.3462	56.5203	52.2735	53.9995	31.1007	37.7133	55.6242	64.6419	27.7663	29.9524	27.3452	36.0973
230.15	36.6433	32.3774	33.107	39.4748	31.489	28.9506	32.3774	40.1528	35.3714	45.5088	41.6647	50.6756	52.1855	56.4562	52.1272	53.9995	30.9946	37.6187	55.4617	64.5807	27.9397	29.8682	27.3044	35.9347
230.6	36.5266	32.3783	33.0621	39.317	31.4067	28.907	32.2607	39.9959	35.3934	45.4285	41.5069	50.5895	51.9426	56.4897	52.0296	53.8025	30.8722	37.523	54.9386	64.5854	28.1233	29.7866	27.2071	35.7893
231.05	36.4042	32.3458	33.0056	39.1745	31.3121	28.832	32.1498	39.8123	35.402	45.353	41.3873	50.4786	51.7265	56.4246	51.8413	53.4985	30.7326	37.3528	54.5513	64.3904	28.0888	29.7489	27.0595	35.6899
231.5	36.3334	32.233	32.9406	38.9957	31.2576	28.7142	32.0321	39.6679	35.1744	45.2439	41.3213	50.381	51.5505	56.1607	51.6462	53.1752	30.614	37.1769	54.3285	64.2966	28.0124	29.7391	26.9031	35.6124
231.95	36.2063	32.1173	32.8459	38.792	31.1734	28.5941	31.8753	39.5178	34.9124	45.1569	41.197	50.3246	51.4243	55.8996	51.3899	52.896	30.4629	37.1434	54.1172	64.4076	27.9336	29.6579	26.7573	35.5828
232.4	36.1011	31.9681	32.7704	38.6208	31.1055	28.4811	31.7395	39.361	34.7403	45.1082	41.0851	50.2902	51.4272	55.6013	51.1068	52.6942	30.3472	37.1051	54.078	64.4602	27.8448	29.5779	26.659	35.5283
232.85	35.972	31.8447	32.6987	38.4324	31.0539	28.3674	31.6162	39.2462	34.638	45.1072	41.0402	50.1525	51.3985	55.3288	50.8946	52.5326	30.2908	37.0621	53.8944	64.5261	27.7656	29.4168	26.6419	35.4632
233.3	35.8362	31.7395	32.539	38.2221	31.05	28.2698	31.5005	39.121	34.616	45.1187	40.9694	50.011	51.19	55.1318	50.7282	52.437	30.2372	37.0066	53.6888	64.3349	27.7125	29.2043	26.6983	35.3447
233.75	35.8085	31.6315	32.4022	38.0585	31.0673	28.1468	31.401	38.9603	34.5911	45.0852	40.935	49.8407	50.7865	55.0964	50.7282	52.3452	30.1875	36.8479	53.5673	63.9122	27.6673	29.0676	26.7642	35.2175
234.2	35.7836	31.5492	32.2368	37.918	30.989	28.0245	31.2897	38.7843	34.4926	44.9896	40.8107	49.6351	50.3294	55.0227	50.7626	52.2639	30.1024	36.6777	53.421	63.5058	27.649	28.9361	26.8002	35.1438
234.65	35.7731	31.4708	32.079	37.7774	30.886	27.9192	31.1755	38.6333	34.3444	44.8194	40.6663	49.529	49.9698	55.0514	50.7416	52.1616	30.0479	36.5801	53.3436	63.218	27.6988	28.8828	26.7677	35.0147
235.1	35.7597	31.3981	31.9279	37.7047	30.6796	27.8429	31.0571	38.4697	34.2354	44.653	40.5142	49.4219	49.9077	55.1002	50.6746	52.022	29.9963	36.4826	53.2852	62.9378	27.6251	28.8052	26.636	34.9354
235.55	35.7147	31.3379	31.7701	37.6168	30.4446	27.8063	30.9344	38.4497	34.1388	44.4837	40.3651	49.266	50.0215	55.0103	50.5914	51.8613	30.0967	36.4511	53.1179	62.6968	27.504	28.6735	26.5665	34.9038
236	35.6717	31.226	31.6506	37.4618	30.2518	27.7703	30.8419	38.5099	34.0843	44.3613	40.3584	49.1828	50.1678	54.9759	50.4853	51.6863	30.2372	36.4214	52.9735	62.4807	27.3254	28.5569	26.5103	34.8158
236.45	35.6669	31.1706	31.5406	37.2955	30.0733	27.7422	30.7572	38.4745	34.0556	44.3537	40.3488	49.0432	50.2969	54.8105	50.3648	51.5439	30.2618	36.3803	52.8061	62.1881	27.0805	28.4195	26.4882	34.8244
236.9	35.6707	31.1543	31.62	37.0937	29.9484	27.6963	30.6495	38.4841	34.0183	44.3422	40.3431	48.8978	50.317	54.6957	50.1037	51.4243	30.3007	36.3086	52.6063	62.0466	27.0178	28.454	26.506	34.8216
237.35	35.6727	31.1285	31.6429	36.8785	29.8628	27.634	30.514	38.2756	34.0221	44.3403	40.345	48.8242	50.36	54.6326	49.7614	51.3096	30.0709	36.2378	52.4829	61.9423	27.0046	28.5205	26.3864	34.7757
237.8	35.6688	31.1646	31.6659	36.7188	29.8201	27.571	30.341	38.0002	34.025	44.2657	40.258	48.7162	50.3743	54.6766	49.4343	51.2522	29.8019	36.2407	52.373	61.7329	27.0656	28.5606	26.2866	34.7479
238.25	35.5684	31.0521	31.6697	36.6136	29.797	27.5044	30.1742	37.7841	34.0193	44.1146	40.1356	48.5612	50.3734	54.8296	49.1704	51.1766	29.5905	36.2235	52.2764	61.4976	27.155	28.5994	26.1801	34.6418
238.7	35.4422	30.9003	31.5808	36.5228	29.7642	27.4541	30.0952	37.5785	33.8768	43.8889	40.0591	48.458	50.3973	54.821	49.1991	51.1786	29.3972	36.2742	52.1396	60.9583	27.1333	28.525	26.0685	34.55
239.15	35.2949	30.7782	31.5865	36.4492	29.7054	27.4032	30.1058	37.4867	33.6406	43.6843	39.9739	48.3155	50.3667	54.7779	49.2641	51.2178	29.3226	36.2292	51.8145	60.4017	27.1183	28.4252	26.0395	34.4391
239.6	35.14	30.6254	31.5808	36.3889	29.6257	27.3466	30.14	37.4035	33.3929	43.4624	39.9271	48.1271	50.3208	54.4566	49.3521	51.1853	29.268	36.0638	51.4884	60.0145	27.0527	28.3472	25.9798	34.3893
240.05	35.0549	30.55	31.5913	36.2789	29.5373	27.2993	30.1824	37.3155	33.1491	43.1612	39.9395	48.1453	50.1821	54.1114	49.4391	51.1614	29.21	35.8649	51.1192	59.8012	27.0312	28.2759	25.9296	34.3559
240.5	35.0023	30.4738	31.5674	36.1575	29.401	27.2598	30.1436	37.1998	33.172	42.9738	39.8956	48.0573	50.0435	53.8752	49.3617	50.9424	29.1052	35.6182	50.7616	60.089	27.0781	28.2432	25.8714	34.3272
240.95	34.9574	30.3699	31.4995	36.0236	29.1943	27.2124	30.0621	37.0621	33.2361	42.7911	39.8583	47.9425	49.9306	53.6142	49.2134	50.687	29.0083	35.3992	50.6765	60.3874	26.9601	28.2375	25.7733	34.353
241.4	34.9296	30.3146	31.3962	35.8534	28.9935	27.1642	30.0067	36.9464	33.3145	42.7634	39.8219	47.8852	49.7719	53.4239	49.048	50.4661	28.9459	35.1993	50.5723	60.5576	26.8336	28.2279	25.6994	34.3578
241.85	34.8742	30.2851	31.2547	35.7329	28.7757	27.0449	29.9256	36.8431	33.3814	42.9126	39.7703	47.7455	49.5443	53.1743	48.8204	50.251	28.8868	35.0243	50.5436	60.5337	26.6426	28.1664	25.6663	34.3989
242.3	34.7766	30.2783	31.1505	35.6344	28.6816	26.8756	29.8943	36.715	33.3231	43.0092	39.6747	47.6518	49.2364	52.9171	48.6406	50.119	28.8404	34.8493	50.6096	60.243	26.3878	28.0635	25.6467	34.3635
242.75	34.6781	30.2498	31.0654	35.4919	28.7575	26.7333	29.8699	36.6203	33.3097	43.0541	39.5628	47.6853	48.8596	52.766	48.5297	49.9928	28.8244	34.7059	50.5876	60.0499	26.3659	27.9892	25.6691	34.3081
243.2	34.6619	30.1869	31.0233	35.3714	28.8298	26.6178	29.8065	36.5524	33.2782	42.9499	39.3945	47.6509	48.5976	52.8769	48.3623	49.8819	28.7952	34.6007	50.579	59.9638	26.3883	27.9013	25.6728	34.2038
243.65	34.6543	30.108	31.0491	35.2089	28.9452	26.64	29.7605	36.5084	33.2447	42.7567	39.2577	47.5304	48.6779	53.094	48.2199	49.7862	28.7633	34.4821	50.4795	59.9791	26.3639	27.8554	25.5822	34.0853
244.1	34.7183	30.0076	31.0194	35.0396	28.9711	26.7042	29.7072	36.5075	33.2313	42.6573	39.2826	47.4395	48.7668	53.3627	48.0659	49.7289	28.7594	34.4573	50.3457	60.025	26.2793	27.8278	25.5873	34.0499
244.55	34.769	29.9594	30.9831	35.0291	28.9127	26.7622	29.6877	36.5046	33.1634	42.6506	39.361	47.276	48.8835	53.5798	47.9043	49.7107	28.5543	34.4697	50.3141	59.9829	25.9435	27.7339	25.5908	33.9944
245	34.6657	29.907	30.9343	35.0109	28.8617	26.8159	29.697	36.4205	33.1089	42.6859	39.4652	47.2913	48.9983	53.4937	47.844	49.6715	28.2992	34.5988	50.2997	59.8328	25.5784	27.6608	25.613	34.0566
245.45	34.5768	29.8457	30.8339	35.0157	28.7668	26.7754	29.7339	36.3	33.0764	42.7175	39.5035	47.3267	48.8213	53.3445	47.8832	49.5797	28.0394	34.7336	50.3141	59.7037	25.2833	27.6264	25.7062	34.1005
245.9	34.4305	29.794	30.7737	35.0444	28.6864	26.7158	29.7596	36.1804	33.0362	42.5961	39.427	47.2951	48.7353	53.0882	47.8565	49.4984	27.7917	34.7393	50.1027	59.61	25.0645	27.5839	25.615	34.1264
246.35	34.3291	29.7089	30.7068	34.9698	28.6133	26.6343	29.7196	36.037	33.042	42.3895	39.3112	47.2426	48.677	52.8004	47.8603	49.397	27.8491	34.6418	49.6801	59.4828	25.0014	27.5829	25.5027	34.1646
246.8	34.2737	29.6313	30.6303	34.9095	28.5099	26.5312	29.6664	35.972	33.0056	42.2308	39.2338	46.9557	48.4895	52.6359	47.823	49.3081	27.94	34.3712	49.2306	59.3547	24.9601	27.5703	25.3818	34.0097
247.25	34.2134	29.5694	30.592	34.8656	28.4151	26.4541	29.5485	35.8964	32.8612	42.1026	39.1516	46.7663	48.348	52.5317	47.7207	49.2794	28.0842	34.1905	48.9246	59.2542	24.8292	27.5422	25.2344	33.8787
247.7	34.1417	29.5104	30.5566	34.7977	28.322	26.389	29.4271	35.8046	32.6987	42.1064	39.0951	46.7443	48.0688	52.524	47.6939	49.2842	28.169	34.0623	49.0614	59.1634	24.6661	27.5561	25.1788	33.7611
248.15	34.0174	29.487	30.5958	34.7527	28.2446	26.3488	29.3139	35.7396	32.5055	42.1648	39.0053	46.7491	47.7905	52.5451	47.6308	49.2746	28.1242	34.0346	49.2995	59.1443	24.4814	27.5725	25.1341	33.6913
248.6	33.9103	29.4455	30.6829	34.6762	28.1945	26.3356	29.2145	35.6421	32.4281	42.1351	38.9574	46.8801	47.6882	52.525	47.5553	49.4114	28.1088	34.0881	49.5271	59.2935	24.291	27.5852	25.0725	33.8261
249.05	33.806	29.3956	30.7487	34.5854	28.1722	26.3281	29.1699	35.5751	32.5696	42.1237	38.9756	46.8849	47.759	52.4408	47.5304	49.5338	28.0349	34.1015	49.5424	59.3575	24.2908	27.5666	25.0125	33.9313
249.5	33.7592	29.2987	30.7965	34.4582	28.1966	26.3387	29.1393	35.5617	32.7168	42.0577	38.9737	46.8113	47.9024	52.3471	47.5419	49.5701	28.0073	34.1503	49.3138	59.5105	24.3922	27.4899	24.9414	34.0021
249.95	33.719	29.1835	30.7361	34.2956	28.1588	26.3013	29.1151	35.5732	32.8756	42.0079	39.0512	46.7529	48.0401	52.2477	47.6002	49.6189	27.9918	34.2153	49.1082	59.7601	24.5428	27.3917	24.8838	34.0183
250.4	33.6922	29.0923	30.7418	34.1656	28.1264	26.1864	29.0874	35.5971	32.9454	42.1208	39.0512	46.7453	48.107	52.2132	47.6757	49.3922	27.9017	34.2918	48.9992	59.8644	24.7207	27.2908	24.9192	33.8519
250.85	33.6597	29.01	30.7686	34.0384	28.0889	26.06	29.0446	35.621	32.8995	42.1523	39.0732	46.8055	48.0927	52.1922	47.7063	49.1484	27.8472	34.2908	49.069	59.9877	24.7967	27.213	24.9328	33.7267
251.3	33.6004	29.0191	30.7977	33.9877	28.0122	25.8982	29.0106	35.5751	32.8737	42.1629	39.1343	46.8543	48.1577	52.1683	47.6891	48.9304	27.8139	34.1933	49.1895	59.8959	24.7993	27.1265	24.9813	33.6559
251.75	33.5765	29.0184	30.8669	33.9734	28.0163	25.8322	28.9996	35.5197	32.8699	42.1227	39.1812	46.9346	48.2447	52.37	47.67	48.7162	27.7833	34.0575	49.2737	59.5947	24.7512	27.0597	25.0061	33.6205
252.2	33.5507	29.0342	30.7095	33.9571	28.0167	25.881	28.97	35.4613	32.9014	41.9171	39.185	46.9222	48.282	52.6149	47.6891	48.6377	27.8281	33.8548	49.2985	59.3365	24.6603	27.0441	24.905	33.6741
252.65	33.5077	29.0547	30.5237	33.9179	27.9933	25.9264	28.9128	35.3533	32.953	41.789	39.141	46.9002	48.3098	52.897	47.6251	48.5861	27.8511	33.7161	49.2699	59.1452	24.5843	27.0208	24.9485	33.7152
253.1	33.479	29.0409	30.3602	33.8223	27.979	26.001	28.8414	35.2701	32.9712	41.7134	39.0999	46.8438	48.3117	53.1198	47.5533	48.5412	27.8264	33.7037	49.2086	58.9731	24.5477	27.0537	24.9696	33.6922
253.55	33.4293	29.0252	30.2024	33.7381	27.9139	26.0204	28.7708	35.1343	32.9645	41.6293	39.0368	46.731	48.2868	52.9859	47.3353	48.4714	27.7706	33.6243	49.178	58.909	24.5818	27.0787	25.0186	33.6138
254	33.4245	28.9848	30.1902	33.654	27.8612	25.9918	28.7174	35.0147	32.933	41.6541	39.1525	46.6631	48.2992	52.8186	47.0953	48.3939	27.6693	33.4685	49.1149	58.844	24.6826	27.0399	25.1392	33.5211
254.45	33.4436	28.9094	30.184	33.6081	27.8284	25.9867	28.7239	35.0052	32.9004	41.7039	39.2673	46.6439	48.305	52.6225	46.9949	48.3212	27.5419	33.2992	49.0528	58.7341	24.7039	27.0731	25.0586	33.3968
254.9	33.4321	28.8407	30.1397	33.6004	27.7899	25.9761	28.7147	35.0014	32.888	41.7278	39.3897	46.6344	48.2734	52.4781	46.9528	48.2591	27.4078	33.062	48.9648	58.6815	24.7122	27.0765	24.9579	33.3451
255.35	33.4312	28.7857	30.0916	33.5689	27.7817	25.9344	28.6929	35.0119	32.8498	41.8482	39.4758	46.643	48.2361	52.4294	47.1355	48.239	27.2747	32.9052	48.8204	58.6461	24.6734	27.0835	24.8369	33.3853
255.8	33.3528	28.779	30.0402	33.565	27.7755	25.9043	28.6898	35.0301	32.7484	41.963	39.4337	46.6707	48.0535	52.3443	47.3105	48.2581	27.1794	33.064	48.4886	58.5581	24.5846	27.1415	24.7063	33.3968
256.25	33.2887	28.8228	30.0267	33.5555	27.738	25.8674	28.6432	35.0081	32.5963	42.0347	39.338	46.6516	47.7896	52.2381	47.3841	48.2447	27.1382	33.2543	48.086	58.3592	24.6591	27.0837	24.6557	33.4302
256.7	33.2351	28.8502	30.035	33.543	27.6985	25.8285	28.6247	34.9947	32.4538	42.0758	39.2109	46.6688	47.4453	52.1578	47.3678	48.2457	27.1122	33.479	47.6585	57.9738	24.7063	27.0394	24.622	33.3757
257.15	33.1692	28.8838	30.0332	33.5172	27.6335	25.8365	28.6066	35.054	32.363	42.0357	39.1544	46.6114	47.1728	52.1214	47.2598	48.196	27.1407	33.6569	47.297	57.4612	24.7312	26.9741	24.5753	33.2667
257.6	33.108	28.8573	29.9984	33.4426	27.5468	25.8427	28.5724	35.0788	32.4539	41.9582	39.0942	46.5655	47.234	52.1109	47.1699	48.174	27.1153	33.5153	47.4443	57.0893	24.7714	26.8786	24.522	33.2198
258.05	33.0248	28.807	29.9027	33.413	27.5212	25.8336	28.5618	35.0616	32.6155	41.8186	39.1133	46.4967	47.408	52.2123	47.1823	48.1787	27.1074	33.3451	47.6796	57.0051	24.7963	26.794	24.4924	33.2055
258.5	33.0161	28.7493	29.8221	33.3719	27.5027	25.7976	28.5415	35.0262	32.7799	41.7536	39.1181	46.5751	47.6853	52.2381	47.2014	48.2495	27.1161	33.1778	48.0573	57.2987	24.8697	26.7048	24.4817	33.304
258.95	33.0448	28.6847	29.7675	33.3642	27.4863	25.6898	28.5381	34.9038	32.932	41.6579	39.0636	46.7252	47.8756	52.1721	47.2426	48.4102	27.0795	33.1003	48.4063	57.7692	25.0146	26.658	24.5294	33.3786
259.4	33.1108	28.6154	29.747	33.3814	27.4699	25.5522	28.5116	34.7852	32.9712	41.5709	39.076	46.7778	47.8928	52.0908	47.2349	48.4436	27.1217	33.2217	48.3815	58.056	25.1876	26.6074	24.5685	33.4187
259.85	33.1873	28.5446	29.783	33.2954	27.4092	25.4196	28.4669	34.6935	32.9664	41.591	39.0684	46.8371	47.8402	51.8556	47.2091	48.4867	27.1292	33.3355	48.2964	58.0723	25.1942	26.6126	24.5957	33.4388
260.3	33.1328	28.5063	29.8319	33.1978	27.3526	25.3615	28.4353	34.6648	32.9502	41.5747	39.0588	46.5942	47.7666	51.7054	47.3248	48.3662	27.1213	33.4302	48.0468	57.9002	25.1908	26.6368	24.6338	33.3661
260.75	33.0209	28.4698	29.8939	33.0869	27.2925	25.4326	28.382	34.6858	32.9339	41.6178	39.0818	46.3934	47.7628	51.8154	47.4271	48.152	27.155	33.4235	47.8154	57.6143	25.0383	26.6907	24.6362	33.347
261.2	32.9014	28.4677	29.948	32.9741	27.2222	25.532	28.3238	34.8072	32.9263	41.6484	39.0349	46.2662	47.7981	51.9369	47.5438	48.0324	27.1474	33.3671	47.7408	57.4354	24.8206	26.7579	24.6119	33.3709
261.65	32.778	28.4667	29.9499	32.9272	27.1913	25.6489	28.2204	34.9612	32.932	41.6417	38.9661	46.1572	47.8364	52.1128	47.5715	47.8852	27.1271	33.3814	47.6585	57.2853	24.7703	26.7933	24.5738	33.3776
262.1	32.7159	28.4161	29.9136	32.9033	27.1432	25.6979	28.0876	35.0253	32.9358	41.6235	38.9699	46.1476	47.8938	52.2085	47.4462	47.8412	27.1096	33.2858	47.7857	57.138	24.7149	26.7927	24.5277	33.391
262.55	32.6786	28.3291	29.8261	32.8804	27.1143	25.6749	27.971	35.0798	32.9444	41.5948	38.988	46.1266	47.954	52.11	47.321	47.8288	26.9774	33.216	47.779	57.1065	24.7841	26.6952	24.4866	33.3862
263	32.6604	28.2248	29.7137	32.8603	27.1237	25.6408	27.9212	34.9755	32.9597	41.4763	39.0703	46.0912	47.8632	52.0172	47.234	47.7943	26.8989	33.084	47.582	57.0424	24.8205	26.5853	24.4471	33.3269
263.45	32.6289	28.1268	29.5887	32.7934	27.0877	25.5727	27.9745	34.8302	32.9817	41.3405	39.1707	46.0625	47.779	51.9876	47.1909	47.7857	26.8164	32.8316	47.4328	57.095	24.7425	26.4906	24.4143	33.2648
263.9	32.6183	28.0621	29.4797	32.7322	27.0051	25.5386	28.0466	34.7422	32.9645	41.2123	39.2271	46.1275	47.7016	52.0583	47.2024	47.7322	26.7473	32.6929	47.0446	57.1715	24.6435	26.4067	24.3665	33.2514
264.35	32.6451	28.0545	29.4112	32.6289	26.9051	25.5205	28.1355	34.6533	32.9454	41.1607	39.2472	46.1543	47.5897	52.1501	47.2062	47.7083	26.8126	32.6327	46.9031	57.1696	24.5938	26.3668	24.3121	33.1902
264.8	32.647	28.0522	29.3945	32.5218	26.807	25.495	28.159	34.6198	32.911	41.3472	39.2147	46.1763	47.6117	52.2649	47.188	47.6691	26.7524	32.6336	46.9002	57.1677	24.5979	26.3503	24.3804	33.1787
265.25	32.7895	28.0316	29.4743	32.4845	26.7515	25.5243	28.1368	34.5749	32.8498	41.5681	39.2195	46.1715	47.7025	52.3232	47.2253	47.5811	26.6954	32.6948	46.9155	57.1265	24.6618	26.3025	24.4632	33.2256
265.7	32.9377	28.0017	29.5681	32.4108	26.8397	25.5324	28.131	34.5098	32.8995	41.7746	39.2539	46.1113	47.7092	52.4829	47.3028	47.5371	26.6404	32.7733	47.0302	57.0567	24.6998	26.2568	24.5411	33.195
266.15	33.0286	27.9592	29.6438	32.4242	26.9325	25.5569	28.0757	34.4582	32.9244	41.8741	39.3543	46.073	47.6652	52.7038	47.3889	47.4912	26.5257	32.7685	47.0245	56.8903	24.637	26.1841	24.6437	33.2361
266.6	33.1099	27.9053	29.6947	32.4328	27.0027	25.6001	28.0648	34.4228	32.9387	41.8033	39.4547	46.0319	47.5887	52.8214	47.4663	47.4721	26.494	32.7522	47.0245	56.8559	24.6906	26.0616	24.655	33.2389
267.05	32.9674	27.8747	29.6875	32.3831	27.0105	25.6574	28.0563	34.4228	33.0037	41.7039	39.5121	46.0663	47.4759	52.9352	47.4768	47.5036	26.4919	32.6872	47.0264	56.789	24.7408	25.9838	24.6581	33.1816
267.5	32.8058	27.8473	29.6353	32.3735	26.9285	25.7365	28.039	34.4238	32.9712	41.656	39.5561	46.0874	47.4682	52.7755	47.4701	47.5916	26.4836	32.5791	47.0704	56.9229	24.8713	25.9115	24.6572	33.2055
267.95	32.6489	27.8125	29.5859	32.3248	26.8743	25.7515	28.0593	34.3979	32.9779	41.6159	39.5436	46.2452	47.5323	52.5431	47.4434	47.6748	26.4769	32.5351	47.1966	57.1648	24.9766	25.8808	24.6117	33.1892
268.4	32.494	27.7991	29.531	32.2808	26.818	25.7433	28.0547	34.375	33.0487	41.6331	39.5484	46.4536	47.6251	52.4188	47.4835	47.8756	26.4428	32.4692	47.3496	57.1945	24.9232	25.8948	24.6047	33.2389
268.85	32.4032	27.7908	29.4767	32.2903	26.8214	25.6148	28.095	34.3855	33.0726	41.6245	39.5972	46.6267	47.715	52.3318	47.5686	48.1061	26.4076	32.4481	47.4166	57.2786	24.8289	25.9186	24.5879	33.3288
269.3	32.3047	27.7999	29.4845	32.2942	26.847	25.4742	28.1119	34.4133	33.1529	41.5996	39.5934	46.8352	47.7159	52.3835	47.6528	48.2046	26.3532	32.2483	47.4529	57.072	24.5792	25.9607	24.5885	33.4283
269.75	32.3066	27.7953	29.5311	32.299	26.8507	25.3805	28.1497	34.5682	33.2342	41.6245	39.6048	46.7826	47.5438	52.5269	47.8393	48.2983	26.3243	32.0216	47.386	56.9133	24.5257	25.9911	24.5707	33.5775
270.2	32.3152	27.7817	29.5778	32.3181	26.8545	25.3278	28.225	34.7374	33.259	41.6685	39.6163	46.6659	47.3736	52.6512	47.9779	48.1749	26.3231	31.881	47.2167	56.9487	24.5453	26.0255	24.5078	33.6607
270.65	32.3908	27.7418	29.6414	32.2932	26.8245	25.3413	28.2087	34.8178	33.3002	41.745	39.5953	46.5215	47.1307	52.808	48.1147	48.0009	26.2871	31.8055	47.0723	56.9525	24.5769	26.0238	24.4548	33.7314
271.1	32.4634	27.7429	29.6549	32.2186	26.7914	25.3465	28.2106	34.8866	33.3097	41.7708	39.6154	46.3475	46.9786	52.9017	48.2476	47.8603	26.2811	32.1124	47.0006	56.9993	24.786	25.9972	24.4004	33.7477
271.55	32.3965	27.7691	29.5988	32.1546	26.7582	25.3556	28.1611	34.7766	33.2839	41.7211	39.6029	46.2327	47.1355	52.9362	48.2562	47.735	26.2951	32.3439	46.9308	56.9927	24.7126	25.9595	24.3456	33.6951
272	32.3592	27.7941	29.6254	32.0542	26.7173	25.3638	28.0934	34.6638	33.2858	41.6006	39.602	46.0979	47.2665	53.0098	48.2658	47.7073	26.2903	32.4338	47.1833	56.875	24.4908	25.9356	24.2992	33.676
272.45	32.277	27.833	29.6427	31.9585	26.7102	25.3861	28.0749	34.5902	33.2275	41.5288	39.5609	46.0319	47.5228	52.9878	48.2591	47.7111	26.2338	32.4978	47.5227	56.7048	24.236	25.959	24.2751	33.6444
272.9	32.211	27.7813	29.6973	31.9403	26.6593	25.4478	28.0691	34.5328	33.2504	41.4858	39.5092	45.986	47.7083	52.9983	48.2285	47.7733	26.0839	32.385	47.6681	56.6293	23.864	26.0005	24.2544	33.6463
273.35	32.2435	27.7093	29.8031	31.9078	26.6012	25.4882	28.0884	34.5127	33.283	41.5441	39.536	46.0195	47.7523	53.0098	48.2505	47.7628	25.8565	32.3592	47.779	56.613	23.5853	26.0894	24.3608	33.7056
273.8	32.2186	27.6517	29.7627	31.927	26.5828	25.4998	28.0699	34.4859	33.2791	41.6474	39.5714	46.2146	47.7723	52.8712	48.2954	47.7599	25.6166	32.3735	47.3716	56.6073	23.4352	26.1419	24.4823	33.7295
274.25	32.1526	27.6009	29.7081	31.9652	26.5431	25.5198	28.0643	34.4678	33.3939	41.7211	39.7272	46.3217	47.7647	52.9582	48.3547	47.713	25.5455	32.3544	46.9088	56.6886	23.3881	26.1376	24.5844	33.7171
274.7	32.0627	27.583	29.6218	31.9738	26.5541	25.5233	28.0475	34.4257	33.3776	41.8339	39.8774	46.4249	47.8517	53.1102	48.4752	47.6671	25.5995	32.3219	46.6602	56.745	23.3623	26.1061	24.6968	33.6875
275.15	31.9375	27.5619	29.4863	31.9729	26.611	25.5428	28.042	34.4582	33.3613	41.9152	39.95	46.511	47.9186	53.2709	48.5373	47.7121	25.7094	32.232	46.4813	56.7163	23.3653	26.0163	24.7435	33.6473
275.6	31.8505	27.5154	29.4055	31.9432	26.66	25.6584	28.0829	34.5041	33.391	41.9697	40.0304	46.3915	47.9751	53.6161	48.5593	47.7685	25.8785	32.188	46.5502	56.7096	23.3619	25.9345	24.7866	33.6463
276.05	31.8772	27.4805	29.337	31.9241	26.7252	25.7663	28.1126	34.5825	33.3814	41.9869	40.06	46.2757	47.9712	53.6256	48.6052	47.8804	25.9402	32.1431	46.642	56.6723	23.259	25.8485	24.8386	33.7267
276.5	31.9346	27.4194	29.272	31.8916	26.7732	25.8346	28.1406	34.6887	33.4379	41.9314	40.1337	46.1696	47.8507	53.6132	48.5919	47.9894	25.9884	32.1173	46.6018	56.6761	23.2041	25.7838	24.8798	33.8137
276.95	31.9518	27.3891	29.2508	31.8839	26.7806	25.8895	28.1365	34.7384	33.5182	41.765	40.28	46.1352	47.7676	53.5711	48.6693	48.0439	26.0166	32.1507	46.5808	56.7029	23.1902	25.7412	24.9008	33.8644
277.4	31.9748	27.2847	29.2426	31.905	26.756	25.769	28.1105	34.8226	33.588	41.5748	40.4301	46.2251	47.7714	53.4315	48.8061	48.086	26.0005	32.1354	46.6114	56.7125	23.2071	25.7209	24.9294	33.9093
277.85	31.9251	27.1539	29.2636	31.9164	26.731	25.6596	28.092	34.8455	33.6205	41.3787	40.4856	46.3475	47.802	53.4659	48.8596	48.1089	25.9784	32.1459	46.621	56.7058	23.2651	25.7382	24.9484	33.9036
278.3	31.8552	27.0783	29.342	31.9509	26.7067	25.5981	28.1174	34.9717	33.6473	41.2716	40.6032	46.4842	47.7695	53.4153	48.8797	48.0257	25.8908	32.1383	46.687	56.6369	23.2937	25.7575	24.9456	33.8969
278.75	31.8151	27.0024	29.4319	31.9767	26.6754	25.5527	28.1935	35.1353	33.6387	41.3873	40.6959	46.5081	47.6939	53.4181	48.8759	47.955	25.7835	32.2387	46.7281	56.5757	23.2937	25.7869	24.9681	33.939
279.2	31.7759	27.1272	29.5147	31.9576	26.6474	25.6152	28.2838	35.2184	33.5765	41.547	40.7476	46.5273	47.5304	53.4507	48.8395	47.8536	25.6754	32.4386	46.7176	56.5174	23.2535	25.7578	24.9684	33.9447
279.65	31.7596	27.2512	29.5457	31.9203	26.6397	25.6533	28.3308	35.3533	33.5545	41.7488	40.8843	46.5694	47.385	53.6572	48.9237	47.7417	25.6272	32.5285	46.6506	56.483	23.2215	25.7411	24.9693	33.9629
280.1	31.7787	27.3543	29.5019	31.8438	26.6466	25.6543	28.3077	35.2557	33.5105	41.8559	40.8748	46.5483	47.5094	53.9881	49.1522	47.7809	25.6361	32.6681	46.5426	56.4954	23.1877	25.6705	24.9771	33.9906
280.55	31.7376	27.4297	29.421	31.7625	26.6735	25.6425	28.2503	35.1352	33.4952	41.8167	40.8126	46.5751	47.6643	54.3304	49.4037	47.8507	25.6948	32.5763	46.446	56.4571	23.1193	25.6001	24.9395	34.0021
281	31.6822	27.3926	29.35	31.6975	26.7508	25.6238	28.1815	35.0234	33.5392	41.8463	40.7677	46.5426	47.9425	54.6154	49.6772	47.9234	25.7496	32.3783	46.3331	56.4629	23.0368	25.5888	24.9375	34.0508
281.45	31.6506	27.3676	29.3071	31.6592	26.7484	25.6062	28.1643	34.8809	33.588	41.8502	40.6979	46.4488	48.2093	54.5695	49.8799	48.0047	25.8266	32.3104	46.2586	56.4198	22.973	25.5442	24.921	34.1111
281.9	31.5817	27.3559	29.3094	31.6745	26.705	25.6405	28.1894	34.8723	33.6922	41.9333	40.6768	46.3991	48.3279	54.4432	50.0033	48.0382	25.8703	32.1775	46.2308	56.2735	22.9337	25.5714	24.9141	34.1694
282.35	31.6659	27.3496	29.3411	31.6774	26.6544	25.6878	28.2098	34.856	33.9103	42.0538	40.6998	46.2939	48.4207	54.2816	50.0549	48.0468	25.9448	32.0828	46.0969	56.176	22.9466	25.5724	24.9314	34.2182
282.8	31.7596	27.3493	29.377	31.7099	26.5448	25.6772	28.2434	34.8876	34.1455	42.0242	40.7457	46.227	48.3671	54.2147	50.0549	48.0927	26.0642	32.0599	45.9889	56.0221	22.9344	25.5762	24.9133	34.2115
283.25	31.7653	27.3432	29.401	31.7137	26.4873	25.6249	28.2805	34.9373	34.3329	42.0796	40.8231	46.2213	48.2256	54.2864	50.053	48.1242	26.0586	32.057	45.9458	55.9293	22.8783	25.593	24.9427	34.2077
283.7	31.7501	27.3141	29.4061	31.6908	26.4879	25.5456	28.3127	34.9449	34.4639	42.0911	40.8509	46.206	48.085	54.3801	50.032	48.1233	26.0872	32.0914	45.9611	55.936	22.809	25.6339	24.9945	34.1665
284.15	31.6688	27.3666	29.4058	31.6841	26.4816	25.4712	28.3812	34.9966	34.3645	42.0959	40.8863	46.184	47.9272	54.4662	50.0664	48.1606	26.0087	32.1765	46.1036	55.9083	22.7381	25.6991	25.0759	34.1388
284.6	31.5626	27.4302	29.3872	31.6592	26.4867	25.4736	28.4608	35.0291	34.2211	42.2116	40.8796	46.1295	47.802	54.4777	50.1945	48.2218	25.9074	32.2358	46.2605	55.9475	22.7999	25.7443	25.1811	34.178
285.05	31.5665	27.516	29.3582	31.6611	26.5008	25.5944	28.5019	35.0578	34.112	42.1619	40.87	46.0539	47.8182	54.515	50.3342	48.2935	25.8403	32.2215	46.4039	55.9456	22.8623	25.7692	25.2483	34.2287
285.5	31.6277	27.5882	29.3469	31.6783	26.4887	25.7004	28.5177	35.1152	34.0623	42.1695	40.8891	45.9525	47.8727	54.5427	50.5245	48.393	25.735	32.167	46.3781	56.0842	22.9329	25.7385	25.2923	34.3176
285.95	31.6611	27.5275	29.3201	31.7223	26.5018	25.8049	28.4858	35.141	34.112	42.1351	40.869	45.9745	47.8813	54.5877	50.6851	48.4503	25.6648	32.1727	46.2777	56.2803	22.97	25.7238	25.2793	34.3788
286.4	31.7338	27.428	29.3287	31.7567	26.5528	25.8692	28.4189	35.1783	34.1799	42.0644	40.869	46.0845	47.9741	54.6909	50.6947	48.4455	25.5654	32.145	46.2337	56.4026	22.8686	25.7046	25.2781	34.4506
286.85	31.7175	27.3089	29.4054	31.7854	26.5921	25.8563	28.3718	35.2911	34.2344	42.1103	40.848	46.2184	48.0544	54.7091	50.7721	48.4819	25.4964	32.0752	46.1543	56.5346	22.8093	25.7314	25.2616	34.4783
287.3	31.6669	27.226	29.4419	31.7692	26.6179	25.8542	28.3733	35.4059	34.2459	42.095	40.978	46.4077	48.0152	54.7426	50.7913	48.5287	25.4484	32.0408	46.117	56.4304	22.7747	25.7501	25.2558	34.5366
287.75	31.621	27.1781	29.5015	31.7147	26.5835	25.8236	28.4416	35.5225	34.3004	42.1217	41.1808	46.5875	48.0736	54.7646	50.8286	48.5928	25.4312	31.8954	46.2079	56.3099	22.7861	25.7364	25.2855	34.5969
288.2	31.5492	27.1608	29.5145	31.6659	26.4415	25.8231	28.5379	35.6258	34.3769	42.1562	41.4036	46.6439	48.0563	54.778	51.0112	48.6492	25.4286	31.7501	46.1113	56.1732	22.885	25.7388	25.2751	34.6122
288.65	31.5215	27.1478	29.4488	31.6085	26.2762	25.8382	28.6463	35.5818	34.4716	42.1858	41.591	46.7329	47.9884	54.9243	51.0791	48.6626	25.4436	31.6716	46.139	56.0249	22.9644	25.6957	25.3314	34.6867
289.1	31.5263	27.1227	29.4303	31.6133	26.1183	25.8583	28.7105	35.5321	34.5806	42.2078	41.6159	46.6975	48.0372	55.0294	51.2034	48.6158	25.4597	31.6037	46.2978	55.8767	23.0007	25.7037	25.3771	34.6705
289.55	31.5971	27.1347	29.3783	31.641	26.0816	25.9045	28.7407	35.491	34.6409	42.2193	41.5633	46.5713	48.064	55.1385	51.2885	48.6225	25.4781	31.6506	46.3609	55.718	23.0189	25.7351	25.4145	34.6954
290	31.6802	27.1575	29.3812	31.6783	26.2266	25.9357	28.7726	35.4661	34.7001	42.2499	41.4791	46.4795	48.1233	55.1805	51.3392	48.7382	25.5136	31.7902	46.5579	55.6367	23.028	25.7757	25.4563	34.7527
290.45	31.7615	27.1541	29.4369	31.7491	26.4188	25.9976	28.8107	35.4948	34.7336	42.2547	41.4552	46.2633	48.2151	55.1385	51.4511	48.8711	25.5285	31.8782	46.512	55.63	23.0326	25.8937	25.4378	34.7489
290.9	31.794	27.1568	29.4809	31.7864	26.6286	26.0359	28.8897	35.5407	34.8445	42.3025	41.503	46.2079	48.283	55.1805	51.4855	49.0949	25.4968	31.9117	46.3379	55.7065	23.0289	25.964	25.4924	34.8637
291.35	31.7137	27.1511	29.5873	31.8218	26.7473	26.1327	28.9493	35.5866	35.0167	42.3924	41.5623	46.14	48.4102	55.2274	51.6003	49.2096	25.3905	31.9069	46.1113	55.7916	23.0205	25.9968	25.5707	34.9344
291.8	31.62	27.1327	29.6434	31.8504	26.7577	26.2475	29.0096	35.6258	35.1372	42.4564	41.6388	46.1792	48.4417	55.3775	51.6959	49.2325	25.2808	31.9193	45.899	55.7801	22.9843	26.0041	25.6675	34.9488
292.25	31.5282	27.1779	29.6618	31.8428	26.7485	26.3171	29.0531	35.6765	35.2624	42.5023	41.7105	46.3121	48.5087	55.585	51.8097	49.2105	25.146	32.0102	45.8177	55.7237	22.9462	25.9069	25.7821	34.9813
292.7	31.4718	27.2114	29.6962	31.9413	26.7335	26.4173	29.0548	35.7339	35.2261	42.5243	41.7507	46.4173	48.5804	55.8136	52.0296	49.1283	25.0941	32.0857	45.7651	55.6548	22.9019	25.8701	25.7909	34.9373
293.15	31.4584	27.2244	29.6303	32.036	26.7264	26.3949	29.0982	35.775	35.1152	42.5215	41.7956	46.5913	48.5689	56.046	52.2171	49.0862	25.1525	32.057	45.7919	55.6539	22.8368	25.8764	25.7916	34.9603
293.6	31.467	27.2488	29.6821	32.1459	26.7238	26.3392	29.1378	35.8218	35.0129	42.5396	41.8167	46.6401	48.7334	56.2181	52.4408	49.0614	25.1614	31.8667	45.7202	55.7476	22.7746	25.9004	25.7929	34.9995
294.05	31.4718	27.2576	29.7533	32.2703	26.7326	26.2953	29.2021	35.9194	34.945	42.6697	41.7976	46.6611	48.7028	56.3998	52.6732	49.1034	25.2113	31.6257	45.6112	55.7639	22.7393	25.9845	25.7834	35.0454
294.5	31.4718	27.287	29.7827	32.1899	26.7422	26.2653	29.3009	36.0198	34.966	42.7978	41.7756	46.6564	48.6253	56.417	52.8511	49.1321	25.2242	31.5253	45.6073	55.7935	22.7508	26.0084	25.7825	35.0826
294.95	31.5196	27.3379	29.9004	32.101	26.7546	26.3048	29.3447	36.1355	35.009	43.0092	41.7631	46.6162	48.5804	56.4046	52.9821	49.1551	25.2054	31.5569	45.5299	55.7218	22.774	26.0196	25.7478	35.074
295.4	31.5569	27.3509	29.8441	31.9776	26.8229	26.3623	29.3622	36.2196	35.0894	43.2176	41.7297	46.6363	48.4723	56.3501	52.897	49.1953	25.2535	31.6975	45.571	55.6462	22.8382	25.9934	25.7184	35.1716
295.85	31.5349	27.3307	29.7735	31.8524	26.8549	26.4205	29.3371	36.2742	35.1305	43.3735	41.7134	46.6765	48.5746	56.1598	52.7832	49.2	25.2859	31.8639	45.615	55.7237	22.9224	25.9344	25.7123	35.2557
296.3	31.5311	27.2767	29.7028	31.8199	26.8429	26.4383	29.2895	36.2627	35.1486	43.603	41.6771	46.6927	48.7295	56.1043	52.7086	49.2211	25.2923	31.9327	45.5155	55.7285	22.9831	25.8749	25.7582	35.3762
296.75	31.4871	27.2012	29.5931	31.7692	26.85	26.4476	29.2725	36.2244	35.1974	43.626	41.7019	46.6927	48.8959	56.0747	52.7363	49.2804	25.2627	31.9614	45.5318	55.6854	23.0629	25.8085	25.8483	35.4871
297.2	31.4441	27.1555	29.5304	31.7376	26.7852	26.4451	29.2788	36.234	35.2548	43.6135	41.8301	46.6927	49.0231	56.1301	53.0806	49.3129	25.2056	31.9155	45.4218	55.6003	23.0702	25.7805	25.9529	35.5292
297.65	31.4708	27.0882	29.4929	31.6917	26.7374	26.4437	29.2914	36.2082	35.3427	43.495	41.9764	46.73	49.0767	56.2984	53.3502	49.3569	25.16	31.8868	45.4304	55.4741	22.971	25.7805	26.0467	35.6143
298.1	31.4479	27.05	29.4636	31.6793	26.7493	26.4807	29.3161	36.2311	35.4269	43.3467	42.2011	46.8046	49.0939	56.4399	53.5577	49.3999	25.1298	31.84	45.4811	55.4789	22.9437	25.7907	26.1064	35.6593
298.55	31.4096	27.0442	29.462	31.7156	26.7359	26.4799	29.3332	36.2933	35.5407	43.2941	42.3207	46.9107	49.0499	56.6331	53.749	49.4888	25.0973	31.7778	45.4075	55.6137	22.9132	25.8229	26.149	35.7071
299	31.3503	27.0553	29.4989	31.8007	26.73	26.5105	29.339	36.3114	35.6153	43.3056	42.4039	47.0322	49.0642	56.8597	53.8819	49.6017	25.1004	31.7749	45.4658	55.7113	22.9349	25.8603	26.1378	35.7205
299.45	31.2796	27.1356	29.5022	31.9059	26.7562	26.5322	29.3467	36.3564	35.7186	43.427	42.4861	47.0437	49.0882	57.1476	54.1631	49.8474	25.0975	31.7108	45.3587	55.6835	23.0219	25.8839	26.1851	35.71
299.9	31.2576	27.2032	29.58	31.9738	26.7431	26.546	29.3542	36.4166	35.8764	43.4997	42.4956	47.0829	49.1073	57.4966	54.4595	50.1075	25.1509	31.6802	45.2631	55.5391	22.9936	25.9372	26.2711	35.7578
300.35	31.2643	27.2716	29.6244	32.0245	26.7595	26.6503	29.3906	36.4616	35.9318	43.6116	42.6333	47.167	49.1819	57.73	54.7014	50.2472	25.2321	31.6888	45.2526	55.3335	22.944	25.9649	26.3528	35.8324
300.8	31.4125	27.338	29.6779	31.9872	26.794	26.7086	29.4355	36.5189	35.9835	43.6594	42.7338	47.2177	49.1809	57.8418	54.8726	50.3734	25.265	31.7271	45.1206	55.1279	22.8849	25.9803	26.4742	35.9701
301.25	31.5789	27.3341	29.7495	31.9356	26.7922	26.7816	29.4799	36.5572	35.9815	43.6518	42.8112	47.3219	49.1781	57.7988	54.9558	50.2242	25.1905	31.8265	45.0613	55.0744	22.8255	26.0872	26.4723	36.103
301.7	31.686	27.2996	29.7268	31.9394	26.8216	26.8113	29.4708	36.6041	35.9251	43.6231	42.904	47.4396	49.2297	57.6248	55.0715	50.1448	25.039	31.9107	45.0058	55.0428	22.782	26.173	26.4218	36.1986
302.15	31.794	27.2058	29.7225	31.9394	26.8229	26.7676	29.4259	36.6806	35.9299	43.5867	42.9049	47.5027	49.3148	57.5693	55.1729	50.1247	24.8773	31.9891	44.8911	55.1088	22.7502	26.2563	26.3814	36.2512
302.6	31.6697	27.0643	29.7134	32.0016	26.8076	26.75	29.3835	36.7647	35.9634	43.6078	42.9327	47.6011	49.4401	57.6697	55.2895	50.1439	24.7029	32.0159	44.8605	55.2245	22.6976	26.3024	26.3191	36.2177
303.05	31.5081	26.985	29.6981	32.0934	26.8087	26.7135	29.3879	36.8078	35.9796	43.6661	43.0015	47.7006	49.5979	57.8753	55.4292	50.3131	24.7358	31.9968	44.8261	55.2446	22.6379	26.2025	26.347	36.2005
303.5	31.3771	26.9367	29.7153	32.1345	26.7977	26.7078	29.5046	36.7772	36.0341	43.7665	43.0378	47.7283	49.6925	58.1345	55.4732	50.3896	24.8016	31.9948	44.7878	55.2809	22.6284	26.1025	26.4032	36.1632
303.95	31.2126	26.964	29.7454	32.1775	26.8471	26.7378	29.6557	36.715	36.0848	43.8679	43.0378	47.7924	49.7346	58.3468	55.5477	50.5178	24.8675	32.0293	44.7151	55.1366	22.6432	26.0121	26.4391	36.1871
304.4	31.1591	27.0246	29.7476	32.1861	26.9039	26.788	29.829	36.6748	36.1326	43.9482	42.9986	47.8001	49.7356	58.4319	55.5678	50.601	24.9664	32.036	44.6731	55.1031	22.6596	25.9752	26.5332	36.3
304.85	31.1457	27.0317	29.7873	32.1689	27.0589	26.8709	29.9535	36.758	36.2378	44.0304	43.0091	47.8173	49.6868	58.4979	55.5717	50.6603	24.9626	31.9968	44.6425	55.0792	22.6879	26.0116	26.5891	36.4176
305.3	31.1419	27.0883	29.8299	32.1526	27.2296	26.9673	30.0208	36.9053	36.3688	44.1299	43.1354	47.8469	49.7155	58.6059	55.7189	50.7568	24.9166	31.9776	44.8146	55.0687	22.6926	26.0121	26.6479	36.6089
305.75	31.1639	27.106	29.8599	32.1144	27.3162	27.0633	30.0691	37.065	36.4721	44.1691	43.3458	47.8498	49.7834	58.6604	55.8537	50.7712	24.8876	31.8686	45.1435	55.1308	22.6327	26.0138	26.7536	36.7571
306.2	31.1677	27.1419	29.9228	32.1029	27.418	27.1474	30.1168	37.1893	36.5696	44.1777	43.5609	47.9224	49.944	58.6747	56.024	50.8247	24.8283	31.8304	45.396	55.0122	22.6223	26.0131	26.8025	36.8546
306.65	31.1275	27.2437	29.938	32.1058	27.3357	27.2037	30.1835	37.2677	36.6375	44.1299	43.6212	47.9588	50.1161	58.6757	56.2076	50.9089	24.7644	31.8839	45.6485	54.8841	22.6196	25.9807	26.8742	36.9283
307.1	31.1294	27.296	29.9485	32.1393	27.2444	27.2205	30.2789	37.3433	36.6461	44.0591	43.5724	48.0076	50.1324	58.6872	56.3022	50.995	24.7439	31.926	45.5069	54.7397	22.6453	26.0084	26.9257	36.9187
307.55	31.139	27.3647	29.9592	32.1115	27.2033	27.1297	30.3984	37.4351	36.7332	44.083	43.4835	48.0152	50.0291	58.7971	56.4084	51.1355	24.6927	32.0102	45.2258	54.603	22.7353	26.0767	26.8951	36.934
308	31.1839	27.3837	29.9294	32.0781	27.1662	27.0162	30.4785	37.5575	36.7848	44.1347	43.4576	47.977	49.813	59.0047	56.5289	51.2522	24.6981	32.2263	44.9753	54.5274	22.7793	26.1513	26.9545	36.9617
308.45	31.2518	27.3617	29.8693	32.0379	27.1863	26.9187	30.579	37.6493	36.7236	44.2169	43.5332	48.0822	49.593	59.238	56.6188	51.387	24.7272	32.4883	44.718	54.4758	22.8215	26.2447	27.0121	36.9923
308.9	31.2442	27.3295	29.8177	31.9767	27.1909	26.8856	30.645	37.7306	36.6481	44.28	43.6403	48.1328	49.6906	59.3757	56.723	51.5027	24.7589	32.6652	44.6243	54.448	22.8224	26.3135	27.1152	37.1252
309.35	31.2413	27.3042	29.7393	32.122	27.1828	27.0488	30.6504	37.7803	36.4874	44.2093	43.7742	48.3126	49.9717	59.3862	56.8617	51.5276	24.7961	32.778	44.6444	54.4308	22.7895	26.3025	27.2813	37.2371
309.8	31.1811	27.3327	29.6893	32.2425	27.1743	27.2507	30.6582	37.8061	36.43	44.1462	43.8363	48.5115	50.25	59.3126	56.9535	51.4855	24.753	32.517	44.5956	54.426	22.7459	26.2085	27.2908	37.3347
310.25	31.1094	27.3468	29.7823	32.3678	27.2036	27.461	30.6701	37.8845	36.5725	44.1232	43.8555	48.479	50.5053	59.1892	57.0453	51.4081	24.6874	32.1622	44.5641	54.3897	22.6715	26.1123	27.282	37.4255
310.7	31.0931	27.4094	29.857	32.5065	27.2256	27.6266	30.6752	37.962	36.759	44.1366	43.8918	48.5307	50.3954	59.1777	57.1686	51.3469	24.6131	31.8782	44.586	54.2845	22.6041	26.0442	27.2438	37.4551
311.15	31.0921	27.4442	29.9896	32.5419	27.2397	27.668	30.7257	38.1006	37.0373	44.259	43.8918	48.4503	50.1888	59.2294	57.2518	51.4348	24.5816	31.6831	44.4914	54.2912	22.5063	26.0349	27.2034	37.5259
311.6	31.1686	27.452	30.1093	32.6394	27.2537	27.6752	30.8378	38.2842	37.2362	44.3068	43.9023	48.2696	50.1477	59.3183	57.3886	51.6481	24.6286	31.7634	44.4034	54.3438	22.4383	26.0253	27.2389	37.6196
312.05	31.2815	27.4922	30.102	32.7484	27.2364	27.6707	30.9134	38.3923	37.3844	44.3298	43.9033	48.2505	50.1793	59.4398	57.5712	51.8738	24.6503	31.8945	44.281	54.581	22.3925	26.0335	27.2832	37.744
312.5	31.3771	27.4748	30.1259	32.8479	27.2752	27.6867	31.0111	38.5042	37.5575	44.3011	43.8832	48.1415	50.3303	59.4111	57.6955	52.1023	24.6982	32.0235	44.1442	54.7493	22.3956	25.9774	27.3004	37.8377
312.95	31.4316	27.4516	30.1079	32.9205	27.3286	27.7259	31.1154	38.4965	37.6311	44.2638	43.8803	48.0458	50.4613	59.4665	57.7806	52.241	24.6828	32.1775	44.1117	54.6842	22.505	25.8874	27.3207	37.8989
313.4	31.4536	27.4097	30.1022	32.955	27.4464	27.7717	31.1732	38.4535	37.698	44.2733	43.8736	48.0946	50.4374	59.5689	57.8887	52.3289	24.6591	32.1813	44.1442	54.4662	22.6048	25.9744	27.3496	37.9314
313.85	31.4335	27.3476	30.1188	32.9674	27.6101	27.8209	31.2533	38.4698	37.7153	44.2676	43.9186	48.1252	50.3332	59.632	57.9384	52.3959	24.6734	32.0666	44.1241	54.0091	22.7155	26.0386	27.3786	37.9142
314.3	31.3934	27.294	30.1069	32.9464	27.7004	27.8638	31.3332	38.4851	37.6732	44.3192	43.9559	48.2342	50.2959	59.763	57.9824	52.4284	24.6452	31.9643	44.1576	53.8485	22.748	26.1742	27.4932	37.9543
314.75	31.3551	27.2687	30.0822	32.9062	27.7582	27.9489	31.4073	38.5644	37.676	44.3728	44.1012	48.3317	50.295	59.8194	58.1402	52.4485	24.6818	31.7328	44.106	53.7194	22.7033	26.3447	27.5807	37.9878
315.2	31.314	27.271	30.0913	32.8555	27.674	28.0357	31.469	38.6266	37.7334	44.5153	44.3135	48.3872	50.3275	59.8672	58.2435	52.4695	24.7161	31.6573	44.236	53.706	22.6416	26.3747	27.6634	38.0767
315.65	31.3149	27.2697	30.1174	32.8335	27.5785	28.1713	31.5251	38.6811	37.8319	44.6386	44.4761	48.3604	50.3141	59.9408	58.4127	52.5039	24.7294	31.794	44.5143	53.6849	22.5456	26.4112	27.7607	38.2364
316.1	31.313	27.2965	30.1518	32.911	27.5071	28.3117	31.5822	38.7518	37.9677	44.7199	44.63	48.2763	50.3332	60.0193	58.6346	52.5843	24.7543	31.9021	44.6922	53.553	22.5061	26.4333	27.7537	38.3665
316.55	31.3446	27.337	30.2409	33.0487	27.4843	28.3772	31.6391	38.8389	38.0624	44.7859	44.5794	48.3356	50.3141	60.0929	58.69	52.6942	24.7345	32.0408	44.9006	53.5903	22.5049	26.4285	27.7983	38.5003
317	31.38	27.3699	30.2545	33.1883	27.5189	28.428	31.7145	38.9689	38.1657	44.7591	44.457	48.3891	50.4135	60.135	58.7541	52.8147	24.6837	32.0111	44.7457	53.6333	22.5436	26.4853	27.8825	38.5749
317.45	31.379	27.4265	30.283	33.3078	27.5259	28.3963	31.8028	39.0741	38.2364	44.8452	44.3585	48.5268	50.6478	60.199	58.8019	52.9094	24.6746	31.7759	44.4655	53.8169	22.6104	26.5579	27.9412	38.6457
317.9	31.402	27.4735	30.3234	33.3652	27.5707	28.3563	31.8936	39.164	38.4047	44.9972	44.2829	48.698	50.7425	60.4171	58.8029	52.9926	24.6749	31.555	44.192	53.9087	22.6305	26.5986	28.03	38.7059
318.35	31.4029	27.4676	30.3188	33.3795	27.6026	28.3676	32.0078	39.2472	38.6954	45.1588	44.2915	48.7821	50.8955	60.658	58.932	53.1064	24.7743	31.3752	43.9185	53.8943	22.6254	26.6391	28.0559	38.7738
318.8	31.4058	27.5259	30.3906	33.4035	27.6288	28.444	32.1327	39.2826	38.8905	45.3195	44.3345	48.8673	50.8448	60.9459	59.0285	53.2001	24.8746	31.4077	43.8239	53.9029	22.6035	26.6269	28.0267	38.9068
319.25	31.4335	27.5634	30.4088	33.4178	27.6668	28.5256	32.2271	39.3266	39.098	45.3166	44.3986	48.9858	50.8047	61.2672	59.0649	53.3455	24.9522	31.5588	43.7933	53.7509	22.5713	26.612	28.0276	38.9737
319.7	31.4689	27.5793	30.4027	33.4254	27.6871	28.5899	32.3045	39.3868	39.0942	45.2994	44.4522	49.1274	50.8697	61.4231	59.1577	53.5157	25.0194	31.8132	43.8076	53.5931	22.5277	26.609	28.0663	39.0779
320.15	31.4823	27.6316	30.4182	33.4513	27.7179	28.6547	32.3125	39.4451	38.9909	45.2659	44.5344	49.2096	50.8754	61.5885	59.193	53.6017	24.9317	32.1115	43.7713	53.4526	22.4568	26.6597	28.1167	39.1535
320.6	31.5167	27.5826	30.3851	33.4809	27.7598	28.6634	32.3151	39.5408	38.9393	45.2793	44.6176	49.3119	50.9739	61.6899	59.3097	53.64	24.8483	32.2712	43.6604	53.2604	22.3691	26.7148	28.2037	39.1697
321.05	31.5368	27.5591	30.4107	33.5125	27.8206	28.7068	32.3244	39.668	38.8972	45.3989	44.6826	49.3148	50.9806	61.687	59.4857	53.6649	24.744	32.3477	43.5667	53.2537	22.2775	26.7718	28.2574	39.2529
321.5	31.555	27.5532	30.5025	33.5631	27.8661	28.7763	32.3384	39.7512	38.968	45.4276	44.7735	49.2899	51.0007	61.6411	59.7439	53.619	24.6352	32.2473	43.4443	53.3321	22.167	26.8113	28.2691	39.2826
321.95	31.6181	27.5267	30.5765	33.6148	27.9198	28.8179	32.4089	39.8267	39.0492	45.4371	44.8251	49.3215	51.0791	61.5321	60.025	53.6477	24.5637	32.1058	43.5533	53.4966	22.0883	26.774	28.3016	39.3667
322.4	31.62	27.5136	30.6524	33.6798	27.998	28.8675	32.4787	39.8994	39.1554	45.3903	44.871	49.3253	51.104	61.4259	60.1617	53.815	24.5167	31.9987	43.8048	53.6658	22.0325	26.8561	28.3197	39.4518
322.85	31.62	27.4929	30.691	33.8385	28.0533	28.8697	32.5591	39.9233	39.2328	45.3262	44.9054	49.442	51.1996	61.402	60.288	53.9441	24.487	31.9078	43.9396	53.8322	22.0167	26.9337	28.3847	39.4891
323.3	31.621	27.4693	30.6362	33.9887	28.1013	28.7731	32.6566	39.9673	39.2835	45.4017	44.8758	49.5634	51.1747	61.4211	60.2115	54.0837	24.498	31.992	44.1404	53.8857	22.2139	27.0373	28.4841	39.5733
323.75	31.5875	27.464	30.7029	34.1589	28.071	28.6838	32.736	40.0495	39.3323	45.5347	44.8968	49.6619	51.0619	61.5235	60.1579	54.2319	24.549	32.1134	44.0534	53.8178	22.4141	27.1757	28.569	39.6249
324.2	31.5846	27.4972	30.7969	34.3291	28.0254	28.5912	32.8182	40.1059	39.3246	45.7842	44.9188	49.703	51.1107	61.6382	60.222	54.2616	24.6078	32.2138	43.8516	53.705	22.5897	27.1488	28.6393	39.7072
324.65	31.5731	27.5223	30.8858	34.3597	27.991	28.5672	32.9014	40.1977	39.3313	46.0204	44.9609	49.6332	51.0753	61.7788	60.2249	54.2883	24.6713	32.3735	43.7694	53.5023	22.7448	27.098	28.6627	39.7617
325.1	31.5712	27.4637	30.997	34.4075	27.9806	28.7263	32.9483	40.2981	39.3419	46.0568	45.0068	49.5969	51.0925	61.862	60.3129	54.3562	24.7119	32.3401	43.6192	53.3522	22.727	27.0393	28.6187	39.7904
325.55	31.555	27.405	30.8772	34.4209	28.0508	28.8999	32.9894	40.3479	39.4031	45.9765	44.9886	49.5826	51.1919	61.8362	60.3683	54.3562	24.7479	32.2483	43.5437	53.1619	22.7235	26.9948	28.5916	39.8219
326	31.517	27.3292	30.7209	34.4123	28.1349	29.0706	33.0372	40.4234	39.4891	45.6791	44.9188	49.6466	51.1288	61.7807	60.4429	54.3658	24.7036	32.1622	43.4701	53.0375	22.7678	27.0023	28.5687	39.8257
326.45	31.5116	27.2481	30.6032	34.4486	28.2137	29.2062	33.0774	40.4569	39.536	45.3664	44.8528	49.748	51.0542	61.5818	60.6036	54.4213	24.6321	32.0494	43.3716	52.9027	22.7551	27.0349	28.588	39.9108
326.9	31.4602	27.3666	30.4985	34.4668	28.2957	29.2315	33.2103	40.4463	39.6077	45.2574	44.9207	49.8111	51.0141	61.5799	60.7661	54.427	24.5195	32.0044	43.2702	52.7994	22.762	27.0736	28.7319	40.0017
327.35	31.5179	27.485	30.4901	34.4917	28.3321	29.2364	33.3776	40.3851	39.5953	45.3109	45.0259	49.9029	50.8639	61.5923	60.8837	54.47	24.4329	31.9643	43.1851	52.7583	22.7154	27.0897	28.8603	40.0629
327.8	31.618	27.6124	30.5171	34.5424	28.3383	29.2481	33.5048	40.3115	39.5905	45.5356	45.2153	49.9947	50.8276	61.6038	60.9555	54.5637	24.3817	31.9624	43.1641	52.7669	22.5807	27.1008	28.9832	40.125
328.25	31.6626	27.7369	30.5095	34.6131	28.3341	29.2819	33.6377	40.2455	39.6575	45.7202	45.3664	50.0798	50.8725	61.6927	61.0033	54.6804	24.2494	31.9346	43.0761	52.8358	22.4739	27.114	29.0696	40.1317
328.7	31.7312	27.7539	30.5186	34.6858	28.3292	29.3439	33.6425	40.2503	39.6919	45.8043	45.3759	50.1448	50.9232	61.6392	60.9966	54.8344	24.1555	31.9671	42.925	52.7899	22.3421	27.1373	29.0392	40.1958
329.15	31.6716	27.7379	30.5674	34.7977	28.3171	29.4021	33.6062	40.388	39.7292	45.8158	45.3893	50.1534	51.0533	61.6478	61.0568	54.9855	24.0129	31.9786	42.8074	52.8004	22.244	27.1532	28.9771	40.3087
329.6	31.6009	27.7285	30.5754	34.8799	28.2598	29.4606	33.5928	40.5248	39.7636	45.725	45.3425	50.1611	51.0275	61.7319	61.0951	55.1079	23.9838	31.9604	42.6945	52.6808	22.2337	27.1497	28.9099	40.4435
330.05	31.5645	27.6955	30.6368	34.9583	28.2046	29.47	33.5976	40.7189	39.7655	45.7527	45.3023	50.2558	50.9797	61.7941	61.0721	55.2044	24.155	31.9882	42.6247	52.5001	22.2992	27.1253	28.8413	40.5898
330.5	31.5081	27.6523	30.6921	35.0272	28.0894	29.4956	33.6358	40.8834	39.7607	45.8015	45.3673	50.4068	50.8553	61.84	61.1553	55.2924	24.3405	31.9356	42.6945	52.5374	22.4013	27.0748	28.8544	40.6606
330.95	31.4871	27.6761	30.7092	35.031	28.0221	29.5313	33.675	40.9886	39.8257	45.7651	45.3979	50.5761	50.7473	61.8218	61.2108	55.3431	24.5656	32.013	42.7404	52.5173	22.5156	27.0216	28.9183	40.7438
331.4	31.4326	27.668	30.7639	35.0482	28.0667	29.6521	33.7171	41.1052	39.9108	45.8168	45.439	50.6889	50.7875	61.818	61.3102	55.3756	24.6583	32.0628	42.7089	52.5632	22.5912	27.0293	29.0254	40.8222
331.85	31.4785	27.7861	30.7385	35.0549	28.1373	29.8325	33.7324	41.1702	39.9921	45.8388	45.5002	50.6316	50.7827	61.8505	61.4929	55.477	24.6469	32.0647	42.6199	52.677	22.5918	27.0396	29.1691	40.8843
332.3	31.5846	27.8963	30.7297	35.074	28.2728	29.9563	33.7793	41.2238	40.1097	45.8263	45.4706	50.4929	50.9357	61.9146	61.5789	55.6386	24.6362	32.0685	42.4889	52.6283	22.5737	27.0633	29.2766	40.9494
332.75	31.6898	27.9491	30.7555	35.1391	28.3927	30.0778	33.8538	41.2601	40.1729	45.899	45.4744	50.3762	51.1145	62.014	61.6449	55.8681	24.5776	31.9786	42.3981	52.6149	22.5228	27.1547	29.3873	40.9656
333.2	31.8533	28.0237	30.7603	35.2108	28.4637	30.0425	33.9409	41.2936	40.2245	45.9296	45.505	50.3667	51.2579	61.8754	61.6669	56.1301	24.5661	31.9136	42.4956	52.6369	22.4752	27.2043	29.4632	41.0086
333.65	31.839	27.9177	30.8115	35.3131	28.5019	29.9849	34.0365	41.3682	40.2962	45.877	45.5595	50.5006	51.4855	61.7032	61.6526	56.2305	24.5837	31.8849	42.7423	52.6111	22.4324	27.2667	29.552	41.1071
334.1	31.7701	27.8408	30.8317	35.425	28.5261	29.9735	34.1331	41.483	40.4062	45.8808	45.6437	50.7043	51.5343	61.5579	61.6832	56.2649	24.5699	31.9423	42.8944	52.524	22.4037	27.3361	29.6099	41.241
334.55	31.729	27.7815	30.8434	35.5053	28.5288	29.985	34.2096	41.6551	40.5382	45.9181	45.7077	50.8611	51.5123	61.5292	61.7511	56.2516	24.6052	31.9298	42.9728	52.5346	22.4412	27.3119	29.6516	41.3749
335	31.6563	27.7282	30.852	35.5952	28.5392	30.0543	34.2698	41.8033	40.6089	45.9315	45.7622	50.8563	51.4406	61.774	61.8132	56.2315	24.6446	31.8992	42.7634	52.4428	22.4789	27.3946	29.709	41.4466
335.45	31.6688	27.766	30.8514	35.6717	28.5842	30.071	34.3674	41.9898	40.6261	46.0291	45.7517	50.8047	51.2847	62.0552	61.861	56.2659	24.6474	31.861	42.5033	52.4313	22.564	27.4885	29.6699	41.4657
335.9	31.7042	27.7933	30.8506	35.7186	28.6265	30.0662	34.4898	42.1667	40.5573	46.0711	45.8521	50.7454	51.2044	62.3306	61.9117	56.3089	24.6291	31.8438	42.3694	52.4542	22.6426	27.574	29.6884	41.4342
336.35	31.6869	27.8219	30.8347	35.8008	28.6652	30.0551	34.6246	42.2709	40.4942	45.9889	46.0137	50.666	51.1938	62.4262	61.9318	56.3749	24.5147	31.8744	42.3445	52.2572	22.6257	27.7217	29.6984	41.4323
336.8	31.664	27.8619	30.8026	35.8448	28.7168	30.0707	34.7518	42.3876	40.519	45.9545	46.1486	50.6947	51.1824	62.3889	61.9768	56.4285	24.4414	31.9002	42.4909	52.1109	22.6985	27.7044	29.6984	41.4944
337.25	31.6353	27.8844	30.7714	35.8792	28.7427	30.1544	34.7862	42.3694	40.6108	45.8789	46.3417	50.6909	51.1919	62.2818	61.9949	56.5031	24.4201	31.9126	42.5951	51.8087	22.7052	27.6615	29.7789	41.5633
337.7	31.5808	27.908	30.743	35.8763	28.7587	30.2538	34.769	42.3168	40.7304	45.8636	46.3217	50.6603	51.1613	62.0523	61.992	56.5939	24.4399	31.839	42.6554	51.6701	22.7148	27.6183	29.8212	41.6924
338.15	31.5961	27.9068	30.7245	35.8448	28.8136	30.3278	34.7546	42.2977	40.8308	45.8942	46.2337	50.7511	50.9911	61.8065	62.0303	56.6895	24.5892	31.7338	42.5808	51.5878	22.7764	27.5452	29.8859	41.8138
338.6	31.6171	27.8758	30.7701	35.8457	28.8091	30.3614	34.7393	42.2977	40.8872	45.8885	46.1773	50.8764	50.8601	61.6239	62.0571	56.8043	24.6231	31.6257	42.4029	51.5697	22.643	27.5382	29.948	41.8923
339.05	31.621	27.8661	30.8284	35.862	28.8062	30.2823	34.7986	42.3656	40.9092	45.832	46.1017	51.0275	50.7023	61.4948	62.1622	56.9267	24.5649	31.5607	42.2088	51.6596	22.5487	27.553	29.9915	41.9764
339.5	31.6458	27.8473	30.9073	36.0418	28.8214	30.1555	34.8617	42.4688	40.9302	45.7355	46.117	51.1757	50.5321	61.4632	62.2569	57.0233	24.5102	31.4708	41.9314	51.6223	22.4668	27.5479	30.0508	42.0223
339.95	31.619	27.8855	30.9939	36.234	28.8209	30.0339	34.9249	42.5865	40.956	45.7842	46.1333	51.2321	50.4728	61.4709	62.3516	57.0902	24.4105	31.4498	41.7564	51.6768	22.3679	27.566	30.1058	42.0462
340.4	31.5789	27.9159	31.0454	36.43	28.8327	29.9769	35.0272	42.6984	40.9886	45.8655	46.1352	51.168	50.3447	61.3781	62.4616	57.1179	24.3543	31.5071	41.7019	51.5668	22.3801	27.6003	30.154	42.073
340.85	31.5445	27.9556	31.0591	36.6155	28.8579	30.0943	35.1018	42.8179	41.0039	46.0042	46.1352	51.1087	50.2711	61.2901	62.4482	57.1409	24.3795	31.4737	41.6503	51.4492	22.3815	27.6311	30.1923	42.1304
341.3	31.5225	27.9894	31.0535	36.6978	28.8716	30.2746	35.1916	42.904	41.0545	46.1208	46.1562	51.1087	50.3342	61.2376	62.4051	57.1772	24.4188	31.5177	41.6953	51.3918	22.372	27.6993	30.2251	42.2212
341.75	31.5186	28.0109	31.0376	36.8049	28.8706	30.4836	35.2634	42.97	41.1358	46.0558	46.184	51.0743	50.383	61.2634	62.2579	57.2107	24.4203	31.5875	41.6933	51.3048	22.3816	27.7553	30.2162	42.3207
342.2	31.5445	28.094	31.0294	36.9043	28.9087	30.6475	35.3198	43.013	41.2324	45.9908	46.2021	51.1575	50.5073	61.3361	62.081	57.2939	24.461	31.598	41.6245	51.3927	22.384	27.816	30.3303	42.4077
342.65	31.6123	28.1552	31.0655	36.999	28.9211	30.7339	35.3686	43.0206	41.3759	45.9382	46.1974	51.2235	50.6096	61.3877	62.0054	57.3627	24.4536	31.6946	41.5767	51.4683	22.3679	27.8619	30.4446	42.445
343.1	31.6611	28.2473	31.0958	37.0698	28.9274	30.775	35.3705	43.0589	41.438	45.8942	46.1534	51.2226	50.5752	61.3992	61.9825	57.4345	24.3839	31.7548	41.5719	51.6098	22.3251	27.8695	30.5637	42.4822
343.55	31.7147	28.3195	31.1103	37.1339	28.9462	30.7787	35.3791	43.101	41.4332	45.9458	46.1256	51.3067	50.5226	61.3198	62.0112	57.5875	24.3662	31.7606	41.5011	51.7217	22.2797	27.8366	30.7064	42.552
344	31.7347	28.3242	31.1171	37.2075	28.9628	30.7981	35.3619	43.2731	41.4562	45.9525	46.0797	51.3344	50.4375	61.2471	62.0475	57.684	24.3332	31.7405	41.4371	51.7275	22.2551	27.7764	30.6308	42.6391
344.45	31.7194	28.3232	31.1003	37.2582	29.001	30.8093	35.3619	43.5083	41.4285	45.899	46.0482	51.3956	50.3351	61.1792	62.0771	57.7797	24.3264	31.6582	41.3778	51.7514	22.2831	27.7338	30.5579	42.7271
344.9	31.7319	28.309	31.1089	37.3442	29.0323	30.8371	35.4546	43.6948	41.5145	45.8531	46.1036	51.4444	50.3074	61.1017	62.0886	57.8571	24.3882	31.5674	41.2142	51.5831	22.3335	27.7384	30.4535	42.7404
345.35	31.751	28.2917	31.1047	37.4246	29.0866	30.8921	35.5493	43.8956	41.6819	45.7967	46.1419	51.4224	50.3045	61.096	62.1077	57.8294	24.4446	31.4985	41.1224	51.5917	22.3839	27.8358	30.3565	42.7185
345.8	31.8199	28.3229	31.1093	37.4944	29.1189	30.9226	35.6602	43.9042	41.7545	45.7355	46.1629	51.4272	50.316	61.1151	62.1393	57.8218	24.4922	31.5072	41.0536	51.5945	22.4141	27.9311	30.3837	42.6879
346.25	31.8878	28.3819	31.1315	37.6445	29.2085	30.9877	35.7836	43.8535	41.8473	45.7728	46.0922	51.4071	50.2883	61.1314	62.0886	57.8619	24.5553	31.5865	40.958	51.4989	22.4247	27.9943	30.4177	42.7175
346.7	31.926	28.4159	31.1369	37.7927	29.3221	31.0648	35.8486	43.8277	41.8215	45.8043	45.9229	51.4492	50.2491	61.163	62.0408	57.9126	24.5972	31.6994	40.891	51.4979	22.4324	28.0189	30.4981	42.8179
347.15	31.8734	28.4555	31.2064	37.9247	29.3661	31.0923	35.9194	43.7598	41.7488	45.8034	45.7546	51.5639	50.1879	61.1544	62.0064	57.9987	24.6227	31.7434	40.8795	51.1929	22.4369	27.9556	30.5784	42.903
347.6	31.7673	28.4595	31.2393	38.0595	29.3991	31.1667	35.9815	43.7789	41.7201	45.9009	45.6704	51.6213	50.1735	61.2146	61.9614	58.1287	24.6613	31.5655	40.8662	51.0906	22.4508	27.9612	30.6374	43.0092
348.05	31.643	28.4267	31.2664	38.1188	29.3108	31.1899	36.0322	43.8249	41.6895	45.9745	45.7938	51.6404	50.1707	61.2586	61.9863	58.2081	24.6507	31.3073	40.8767	51.0504	22.44	27.9957	30.7197	43.0675
348.5	31.5158	28.4174	31.2958	38.1599	29.2182	31.1974	36.1173	43.9004	41.7058	46.0061	45.9411	51.5601	50.0703	61.2347	62.0207	58.2626	24.6097	31.0367	40.8748	51.0227	22.4441	28.0644	30.7808	43.1067
348.95	31.5559	28.3996	31.3054	38.2077	29.1613	31.2759	36.1699	43.9817	41.6972	46.052	46.0845	51.4234	49.9182	61.2548	62.0666	58.3286	24.5476	30.8598	40.8432	51.0887	22.4608	28.1968	30.8353	43.1928
349.4	31.619	28.37	31.3459	38.2775	29.1384	31.2767	36.2263	44.0266	41.6962	46.0329	46.184	51.4081	49.703	61.1199	62.102	58.3381	24.4963	31.0262	40.8767	50.8324	22.4058	28.2297	30.8598	43.2578
349.85	31.7003	28.3757	31.372	38.3932	29.1761	31.2877	36.2636	44.0754	41.6895	45.942	46.1333	51.5448	49.6304	61.0635	62.1211	58.3783	24.47	31.2624	40.8891	50.601	22.3094	28.2274	30.8391	43.3171
350.3	31.7883	28.3876	31.396	38.5443	29.1776	31.3076	36.2722	44.1108	41.6799	45.9688	46.1189	51.8068	49.6562	61.0472	62.0532	58.472	24.4715	31.4976	40.8183	50.3581	22.1688	28.1832	30.818	43.3515
350.75	31.8093	28.4188	31.3818	38.7184	29.1921	31.287	36.3067	44.1701	41.7191	45.9478	46.1352	52.0535	49.7489	60.9688	61.9423	58.5724	24.5134	31.7041	40.6443	50.2041	21.985	28.0928	30.8941	43.3783
351.2	31.8504	28.5031	31.3682	38.8561	29.1838	31.33	36.3124	44.259	41.7689	45.9267	46.1256	52.1157	49.8455	60.9832	61.8104	58.6661	24.551	31.7194	40.3048	50.3141	21.903	28.0374	30.9951	43.4194
351.65	31.7988	28.5301	31.3613	38.988	29.172	31.3826	36.2636	44.3996	41.8339	45.9239	46.1706	51.9895	49.8512	60.9354	61.73	58.7359	24.6108	31.7147	40.038	50.4566	21.7707	28.0089	31.1063	43.4443
352.1	31.7271	28.5208	31.3764	39.077	29.1948	31.418	36.2034	44.5162	41.9008	45.8684	46.182	51.8451	49.8073	60.944	61.819	58.8115	24.6603	31.641	40.0418	50.5159	21.6846	28.0108	31.1987	43.5064
352.55	31.6018	28.4723	31.4225	39.1219	29.2149	31.4524	36.1565	44.6778	41.9831	45.9038	46.1467	51.7772	49.7518	60.965	61.9127	58.844	24.6561	31.5798	40.1757	50.5455	21.6458	28.057	31.0971	43.493
353	31.4536	28.3854	31.4709	39.2434	29.2362	31.4651	36.1651	44.8366	41.9955	45.8866	46.1782	51.7858	49.6983	60.9143	62.0552	58.887	24.5996	31.5292	40.4521	50.5178	21.5835	28.1228	31.0105	43.472
353.45	31.51	28.3561	31.5002	39.3428	29.2265	31.4513	36.3095	44.9016	42.0768	45.8665	46.1639	51.8269	49.6199	60.7623	62.0896	58.7876	24.5131	31.4345	40.6405	50.3858	21.7624	28.241	30.9305	43.5217
353.9	31.6104	28.3689	31.4542	39.4671	29.1505	31.4496	36.4903	44.9915	42.1877	45.8043	46.1601	51.8049	49.6036	60.6255	62.0188	58.5982	24.4639	31.3848	40.6816	50.4365	21.9251	28.3475	30.8603	43.5093
354.35	31.751	28.4359	31.4154	39.6173	29.0497	31.4507	36.671	44.9867	42.1858	45.6896	46.1954	51.7112	49.5873	60.5213	61.9825	58.4309	24.46	31.2624	40.673	50.4088	22.0622	28.3633	30.9035	43.5647
354.8	31.8705	28.511	31.3519	39.6526	28.9418	31.4738	36.825	44.959	42.2623	45.6724	46.1916	51.6471	49.573	60.4725	61.9127	58.2961	24.6073	31.204	40.5869	50.2184	22.2042	28.3615	30.9214	43.5772
355.25	31.861	28.5767	31.3275	39.7091	28.8879	31.527	36.9053	44.9676	42.181	45.6561	46.2404	51.7074	49.6686	60.5988	61.9222	58.429	24.7715	31.2031	40.6175	50.1266	22.2162	28.2878	30.9195	43.538
355.7	31.8313	28.6241	31.4201	39.7636	28.9588	31.6047	36.956	44.9858	42.0596	45.6724	46.2337	51.7791	49.7413	60.5854	61.9442	58.6222	24.8784	31.2461	40.6414	49.8694	22.2391	28.184	30.9443	43.5523
356.15	31.7137	28.6263	31.4938	39.8219	29.06	31.7137	36.9942	45.0431	41.9974	45.658	46.2394	51.8307	49.8063	60.4658	61.9394	58.7981	24.9671	31.3905	40.6405	49.7221	22.2845	28.0962	30.9656	43.5533
356.6	31.6401	28.6458	31.5876	39.9147	29.1868	31.7899	37.043	45.1282	41.9027	45.5595	46.2203	51.869	49.8771	60.2947	61.9605	58.9263	24.8423	31.4288	40.542	49.7671	22.2741	28.0168	31.0345	43.6336
357.05	31.6047	28.6371	31.6211	39.9711	29.2847	31.8474	37.0966	45.2124	41.8683	45.4438	46.2566	51.8365	49.7126	59.9887	61.949	58.9043	24.7172	31.3924	40.2886	49.7642	22.2503	27.9488	31.1695	43.7455
357.5	31.554	28.5976	31.5485	40.0285	29.3062	31.8406	37.1492	45.2459	41.8243	45.3032	46.3714	51.8183	49.5079	59.7926	61.9347	58.8555	24.605	31.3188	39.9587	49.8178	22.2138	27.9294	31.2618	43.8622
357.95	31.6611	28.5542	31.4873	40.0964	29.322	31.7835	37.1922	45.2812	41.7928	45.1933	46.4058	51.8279	49.4027	59.718	61.9117	58.8392	24.5279	31.161	39.8411	49.8053	22.1325	27.9672	31.3141	43.9473
358.4	31.7453	28.4864	31.4013	40.1872	29.327	31.7327	37.2132	45.3262	41.745	45.0804	46.4403	51.7705	49.2966	59.6587	61.8792	58.8612	24.5432	31.0807	39.9759	49.725	22.0585	28.0093	31.3226	43.9654
358.85	31.8313	28.4417	31.3689	40.3	29.3275	31.6829	37.24	45.3577	41.7038	45.0737	46.3226	51.6586	49.3148	59.632	61.8687	58.9387	24.5465	31.03	40.1432	49.6409	22.0188	28.0829	31.2598	43.91
359.3	31.9298	28.432	31.3833	40.4196	29.3616	31.6733	37.2553	45.3817	41.6924	45.1015	46.1868	51.5257	49.3664	59.5488	61.8247	58.998	24.5619	30.9592	40.3995	49.5892	21.9807	28.1335	31.2568	43.8172
359.75	31.9719	28.451	31.3844	40.5085	29.3882	31.6783	37.2285	45.4027	41.6991	45.1359	46.0969	51.4846	49.2115	59.4398	61.7731	59.0448	24.5253	30.9133	40.2972	49.5376	21.9625	28.2384	31.2568	43.7703
360.2	31.9939	28.4498	31.4409	40.5611	29.3873	31.6754	37.1271	45.4008	41.7134	45.2009	46.0501	51.6022	49.0489	59.3556	61.6401	59.0926	24.4933	30.8521	40.0744	49.4477	21.9835	28.3407	31.2549	43.7206
360.65	32.0388	28.4196	31.4945	40.6156	29.3854	31.6774	37.0009	45.3797	41.7163	45.2086	46.0816	51.7686	48.9571	59.3403	61.4642	59.1098	24.4569	30.8607	39.9252	49.4009	21.9567	28.3928	31.2499	43.669
361.1	32.0723	28.4035	31.5476	40.628	29.3753	31.6745	36.8852	45.4123	41.7651	45.2162	46.1113	51.9579	48.7955	59.326	61.3131	59.1902	24.4045	30.92	39.7865	49.4028	21.9258	28.4557	31.1498	43.6527
361.55	32.0914	28.3815	31.5911	40.7323	29.3539	31.6745	36.8632	45.4553	41.7746	45.2526	46.1438	52.0468	48.7506	59.2705	61.2213	59.2772	24.3663	30.9831	39.7999	49.4353	21.9225	28.4269	31.0947	43.6097
362	32.1306	28.4098	31.5585	40.8853	29.3258	31.708	37.0057	45.4792	41.7957	45.3185	46.14	52.0296	48.719	59.2017	61.2873	59.3527	24.3341	30.9688	39.7416	49.4764	21.9282	28.3593	31.0702	43.6001
362.45	32.0685	28.487	31.5412	41.0306	29.3266	31.751	37.1673	45.527	41.8368	45.3884	46.0998	52.0239	48.6425	59.0783	61.3657	59.4149	24.3555	30.8999	39.666	49.3033	21.9509	28.313	31.079	43.647
362.9	32.0474	28.5188	31.5323	41.1999	29.2854	31.7575	37.3452	45.549	41.7756	45.3903	46.0491	52.0019	48.8491	59.0381	61.4632	59.4025	24.427	30.8416	39.5522	48.9351	21.9883	28.2571	31.1372	43.6881
363.35	32.0025	28.541	31.5454	41.2133	29.2459	31.6971	37.48	45.5614	41.7411	45.2784	45.9879	51.9837	49.0547	59.0343	61.4957	59.4063	24.6119	30.7947	39.4547	48.5842	22.0045	28.2399	31.1684	43.7617
363.8	31.9757	28.5251	31.6122	41.2085	29.2655	31.6127	37.5288	45.5968	41.7545	45.0517	45.9382	51.9732	49.1914	58.9779	61.4183	59.3977	24.8068	30.8617	39.4346	48.305	22.0175	28.2346	31.1832	43.8067
364.25	32.0178	28.5094	31.6255	41.2238	29.255	31.5198	37.5929	45.6494	41.7746	44.7515	45.9306	51.9273	49.2545	58.9444	61.3886	59.4465	24.9158	30.8464	39.3533	48.3843	22.0407	28.2267	31.1706	43.8411
364.7	32.0465	28.5355	31.617	41.2429	29.266	31.5008	37.6569	45.6934	41.8377	44.5153	45.9516	51.8805	48.9476	58.843	61.3332	59.5708	24.9779	30.7852	39.2701	48.567	22.0778	28.2049	31.1657	43.8325
365.15	32.1029	28.57	31.6095	41.3328	29.2893	31.6196	37.6971	45.7297	41.897	44.4101	45.9965	51.846	48.6578	58.7006	61.2318	59.6234	24.833	30.7374	39.1956	48.6923	22.1139	28.1702	31.1729	43.7942
365.6	32.1383	28.6192	31.5884	41.4256	29.2637	31.7125	37.7535	45.7995	41.8817	44.4875	46.0214	51.826	48.3882	58.5772	61.1764	59.6731	24.6562	30.593	39.1353	48.7936	22.1249	28.1638	31.1502	43.8201
366.05	32.1641	28.6045	31.5798	41.4925	29.2494	31.8007	37.7774	45.8646	41.8578	44.6099	46.0386	51.7734	48.2361	58.4385	61.075	59.6616	24.5391	30.5767	39.1114	48.7324	22.1358	28.17	31.1715	43.8545
366.5	32.146	28.6707	31.5932	41.5642	29.2381	31.8304	37.7898	45.9736	41.8282	44.7314	46.0138	51.7409	48.2294	58.2521	60.9841	59.6033	24.4228	30.5117	39.0636	48.7286	22.1251	28.198	31.1927	43.9004
366.95	32.0886	28.7496	31.5631	41.6465	29.2317	31.7701	37.8147	46.0635	41.7947	44.8165	46.075	51.7122	48.1893	58.1392	61.0587	59.5574	24.418	30.3864	39.077	48.8233	22.1317	28.2197	31.1807	43.9224
367.4	32.035	28.826	31.5569	41.7478	29.2431	31.7663	37.8319	46.1256	41.7937	44.805	46.1974	51.6452	48.1845	58.1517	61.1094	59.5411	24.4625	30.3883	38.9928	48.9046	22.1646	28.2464	31.1852	43.908
367.85	31.9891	28.9458	31.5707	41.8865	29.2537	31.7606	37.8788	46.2002	41.7679	44.8442	46.2729	51.6108	48.0707	58.1287	61.1629	59.5096	24.4911	30.3491	38.9402	48.9323	22.1865	28.2571	31.1923	43.821
368.3	31.9748	28.8929	31.5686	42.029	29.2754	31.7816	37.9036	46.1907	41.7182	44.8653	46.3551	51.5716	47.955	58.123	61.2203	59.4933	24.5191	30.4084	38.7566	48.9065	22.1763	28.2611	31.2122	43.7445
368.75	31.9863	28.8144	31.6784	42.1762	29.2652	31.8457	37.9304	46.1371	41.6369	44.828	46.2672	51.562	47.8823	58.0551	61.1687	59.5287	24.529	30.4744	38.442	48.7267	22.1778	28.216	31.2693	43.7158
369.2	31.9968	28.7329	31.7461	42.269	29.2482	31.8686	37.9361	46.052	41.5298	44.805	46.1084	51.7093	47.8775	57.9365	61.097	59.5249	24.5163	30.4514	38.2613	48.5144	22.124	28.1666	31.3334	43.6307
369.65	32.0092	28.649	31.8117	42.3187	29.27	31.8945	37.9275	45.9372	41.4743	44.6884	45.9851	51.9178	47.9148	57.8265	60.9717	59.5574	24.4647	30.4935	38.0824	48.3423	22.0705	28.1302	31.3412	43.6728
370.1	32.0149	28.619	31.8892	42.3694	29.2735	31.9126	37.9715	45.9372	41.4648	44.5631	45.8684	52.088	47.9617	57.8418	60.7604	59.5803	24.4363	30.482	38.2555	48.1204	22.0429	28.0803	31.3256	43.7464
370.55	32.0235	28.6011	31.8304	42.4029	29.3652	31.9212	38.0146	46.1017	41.4457	44.478	45.7957	52.174	47.9617	57.8504	60.5586	59.5746	24.3947	30.5002	38.4506	48.0362	21.9698	28.083	31.2888	43.7684
371	32.0178	28.5999	31.8892	42.4679	29.4767	31.9337	38.0662	46.2958	41.3213	44.3556	45.7536	52.0249	47.8699	57.8285	60.3712	59.5822	24.341	30.5031	38.5386	48.0123	21.9486	28.0678	31.2379	43.8602
371.45	31.9719	28.5924	31.956	42.5597	29.5114	32.0207	38.0978	46.4852	41.1502	44.3116	45.7106	51.8078	47.7809	57.8418	60.288	59.566	24.3581	30.4285	38.5472	47.9301	21.9245	28.0342	31.2061	43.8593
371.9	31.9748	28.6161	32.0117	42.6467	29.5305	32.1268	38.0949	46.6172	40.9503	44.2303	45.6771	51.6232	47.5916	57.7453	60.3645	59.5755	24.2943	30.3921	38.3617	47.9024	21.9051	27.9972	31.1834	43.8191
372.35	31.9958	28.6564	32.1524	42.7443	29.4346	32.2138	38.1054	46.664	40.8442	44.1997	45.6705	51.5037	47.4424	57.6994	60.4056	59.5918	24.1679	30.3893	38.2641	47.8498	21.9237	28.0184	31.1605	43.8134
372.8	32.0398	28.6215	32.1115	42.8504	29.3245	32.3047	38.1006	46.6918	40.9866	44.1901	45.6762	51.4807	47.3191	57.5712	60.462	59.5956	24.0056	30.4486	38.2268	47.6652	21.9218	28.0584	31.1539	43.7761
373.25	32.1154	28.5843	32.0513	42.9432	29.2453	32.2559	38.115	46.7434	41.1387	44.1108	45.7011	51.4693	47.2751	57.4851	60.4725	59.6262	23.7747	30.4256	38.2173	47.5706	21.9795	28.1127	31.1349	43.7981
373.7	32.1182	28.5376	31.9968	43.0158	29.2206	32.1928	38.1303	46.7874	41.3166	44.1242	45.6963	51.4492	47.3726	57.4182	60.3989	59.5937	23.6816	30.3214	38.1848	47.5055	22.0307	28.1954	31.1294	43.8124
374.15	32.1201	28.4639	31.9107	43.0656	29.227	32.1249	38.1427	46.8084	41.4208	44.0304	45.6848	51.4253	47.3822	57.3455	60.352	59.5402	23.7747	30.2057	38.0672	47.4481	22.0429	28.1825	31.1596	43.8392
374.6	32.1239	28.5147	31.9002	43.078	29.2198	32.0714	38.1934	46.861	41.4103	43.9329	45.6542	51.3832	47.4252	57.358	60.2899	59.3843	23.9372	30.0479	38.0165	47.5447	22.0441	28.1713	31.1854	43.8602
375.05	32.1239	28.5704	31.8897	43.0866	29.2224	32.0838	38.2431	46.8916	41.4151	43.844	45.5729	51.3526	47.3889	57.2212	60.2239	59.2017	24.1558	30.0412	38.048	47.6767	21.9339	28.1882	31.2334	43.7952
375.5	32.1249	28.6289	31.8234	43.1229	29.1842	32.0752	38.2852	46.9232	41.4055	43.7034	45.4792	51.3096	47.3028	57.0586	60.1493	59.0601	24.2864	30.1693	38.1724	47.7494	21.9683	28.2001	31.2025	43.7751
375.95	32.0895	28.7053	31.7476	43.1698	29.1736	32.0694	38.3368	46.9891	41.4198	43.5992	45.3329	51.234	47.2951	56.8473	60.0958	58.9875	24.3242	30.2372	38.5539	47.7322	22.0506	28.2435	31.1352	43.6977
376.4	31.993	28.73	31.6593	43.2616	29.1896	32.0207	38.376	47.0131	41.3978	43.5026	45.1521	51.1958	47.2263	56.6627	60.0594	59.1376	24.3282	30.2784	38.8044	47.6279	22.1518	28.2435	31.0409	43.6126
376.85	31.9136	28.7673	31.5816	43.3677	29.1962	31.9556	38.3932	46.9911	41.3309	43.4586	45.0106	51.1566	47.1278	56.6312	60.0097	59.2868	24.3002	30.2669	38.9603	47.4003	22.2975	28.1964	30.9618	43.5829
377.3	31.8495	28.8154	31.6287	43.4309	29.2072	31.882	38.4105	46.9777	41.2458	43.428	44.9466	51.1336	47.0981	56.6255	59.9533	59.4159	24.2969	30.1435	38.9077	47.232	22.2066	28.1096	30.9529	43.4988
377.75	31.7787	28.8382	31.6844	43.5207	29.176	31.8208	38.3894	46.9203	41.1626	43.4414	44.9934	51.1193	47.0752	56.6255	59.8873	59.4799	24.2713	30.0489	38.4248	47.0972	22.0724	28.0422	30.9403	43.4739
378.2	31.7893	28.8451	31.7612	43.5657	29.1216	31.8151	38.3607	46.8811	41.1263	43.4663	45.0986	51.1279	47.0848	56.5595	59.8175	59.4474	24.2396	29.9857	37.9591	47.0025	21.9447	28.0035	30.9227	43.4471
378.65	31.7663	28.8237	31.8371	43.5753	29.0771	31.8093	38.3694	46.9518	41.1569	43.4701	45.2153	51.1241	47.1268	56.3835	59.7792	59.434	24.2258	29.892	37.5135	46.9413	21.8055	27.9593	30.8604	43.4309
379.1	31.7826	28.758	31.7931	43.6279	29.029	31.8113	38.3827	47.0006	41.1674	43.4892	45.2698	51.1575	47.0379	56.1932	59.7601	59.4522	24.2201	29.8079	37.2763	46.9241	21.7605	27.8737	30.7918	43.4557
379.55	31.8275	28.7496	31.7424	43.6623	29.0438	31.7883	38.4114	47.057	41.1731	43.4672	45.2497	51.1193	46.8773	56.0058	59.7027	59.4685	24.2382	29.7591	37.3022	46.8887	21.7327	27.7594	30.7159	43.4538
380	31.839	28.7683	31.6927	43.7158	29.0404	31.7386	38.4525	47.1488	41.1196	43.363	45.22	50.9949	46.7625	55.8805	59.5727	59.4837	24.2782	29.7342	37.3538	46.9882	21.6573	27.641	30.7353	43.4729
380.45	31.883	28.8145	31.6468	43.7818	29.0281	31.729	38.4755	47.1727	41.0153	43.2788	45.1521	50.8716	46.62	55.7428	59.435	59.4713	24.2621	29.7381	37.4599	47.168	21.6405	27.5653	30.7713	43.3811
380.9	31.86	28.8859	31.663	43.8248	29.0175	31.7644	38.4994	47.1928	41.002	43.1851	45.1234	50.687	46.5665	55.7007	59.4159	59.457	24.2199	29.7094	37.525	47.1622	21.6034	27.6473	30.8019	43.2817
381.35	31.8677	28.8752	31.7041	43.8554	28.9621	31.8294	38.5195	47.2416	40.9589	43.0751	45.1158	50.667	46.6219	55.6912	59.479	59.4627	24.1652	29.6453	37.4752	47.1986	21.5599	27.7363	30.8669	43.1727
381.8	31.8782	28.8162	31.7347	43.9176	28.9514	31.8878	38.5156	47.2492	40.9589	43.0971	45.0651	50.6803	46.5473	55.718	59.653	59.4474	24.1267	29.5066	37.4532	46.9471	21.5631	27.858	30.8623	43.0751
382.25	31.8744	28.7461	31.7539	43.9989	28.9381	31.9251	38.4908	47.276	40.9761	43.0464	45.0345	50.6985	46.5186	55.8882	59.8012	59.4503	24.1928	29.389	37.4131	46.5732	21.5503	27.9595	30.8596	43.1392
382.7	31.9298	28.6916	31.7606	44.0601	28.9279	31.9165	38.4583	47.3286	40.9235	43.0063	44.9705	50.7215	46.4201	55.9274	59.7362	59.3986	24.2939	29.3785	37.3834	46.3475	21.5537	27.9651	30.8552	43.1564
383.15	31.9241	28.6596	31.7558	44.0955	28.9283	31.8849	38.4468	47.3506	40.891	42.9919	44.9265	50.6603	46.2126	55.9781	59.5803	59.3336	24.385	29.3555	37.4494	46.1476	21.5693	27.9959	30.8263	43.208
383.6	31.9116	28.6632	31.7501	44.1031	28.9279	31.8801	38.4305	47.3678	40.8499	42.9116	44.9188	50.6469	46.0845	55.8585	59.3585	59.2762	24.4371	29.4234	37.4704	46.0577	21.601	27.98	30.7899	43.2348
384.05	31.8868	28.642	31.7029	44.0993	28.9349	31.8705	38.4267	47.3831	40.8097	42.9135	44.892	50.6153	45.9688	55.6262	59.1433	59.2007	24.4137	29.4177	37.4704	46.0797	21.5727	27.9559	30.7625	43.1143
384.5	31.8313	28.5863	31.672	44.1375	28.9478	31.8983	38.4545	47.4061	40.7868	42.8944	44.9121	50.5981	45.9267	55.4196	59.0171	59.1969	24.3617	29.3661	37.4035	46.0568	21.5396	27.9784	30.7401	43.0216
384.95	31.7998	28.5729	31.645	44.1136	28.9485	31.9346	38.4497	47.429	40.7858	42.9556	44.8911	50.6	45.9516	55.1547	58.9473	59.1749	24.3296	29.3106	37.3375	45.9621	21.5009	27.9679	30.6859	42.8801
385.4	31.7673	28.5331	31.6294	44.0658	28.9339	31.9384	38.4851	47.4329	40.7744	42.991	44.8442	50.5445	46.0042	55.0094	58.8985	59.2236	24.2995	29.1729	37.2295	45.8827	21.4837	27.9745	30.6657	42.7777
385.85	31.7462	28.565	31.5962	44.0209	28.9075	31.9117	38.5663	47.4271	40.7495	43.0675	44.8318	50.5092	46.0233	54.8554	58.845	59.3671	24.2972	29.1547	37.0592	45.7651	21.5304	27.9588	30.6317	42.7969
386.3	31.7166	28.642	31.5133	43.9415	28.8425	31.8868	38.6132	47.3564	40.7399	43.0809	44.7304	50.4585	46.0157	54.7655	58.7809	59.4694	24.2831	29.1576	36.846	45.7163	21.5836	27.8594	30.5984	42.8523
386.75	31.7041	28.6757	31.4084	44.04	28.8128	31.861	38.6744	47.2827	40.7026	42.9795	44.6405	50.3753	46.0482	54.7215	58.69	59.5956	24.2449	29.216	36.5916	45.7766	21.6402	27.8111	30.6114	42.9432
387.2	31.6152	28.7353	31.2796	44.1643	28.7534	31.9193	38.6935	47.2569	40.6883	42.9604	44.6071	50.2873	45.9353	54.6192	58.5982	59.5545	24.2251	29.3489	36.5084	45.8598	21.6333	27.7875	30.5873	42.9547
387.65	31.5244	28.721	31.2958	44.3049	28.7009	32.0379	38.639	47.2062	40.6778	42.8475	44.5229	50.1812	45.811	54.6355	58.5198	59.3575	24.2012	29.3288	36.5715	45.9497	21.5969	27.8393	30.5816	42.9355
388.1	31.4613	28.6932	31.3427	44.4684	28.7139	32.0887	38.5874	47.2148	40.6644	42.8504	44.4675	50.1104	45.6972	54.6163	58.4452	59.1376	24.1708	29.302	36.846	45.9487	21.5859	27.9515	30.5692	42.8762
388.55	31.3513	28.6909	31.4058	44.5641	28.6862	32.1434	38.5396	47.2445	40.6386	42.8858	44.4263	50.0645	45.4974	54.5752	58.3936	58.9004	24.1673	29.3546	37.1051	45.8148	21.5961	28.0139	30.5536	42.7711
389	31.4106	28.6862	31.4804	44.6453	28.678	32.0595	38.4994	47.2569	40.5822	42.7108	44.3212	50.0454	45.5308	54.5666	58.3238	58.7398	24.1268	29.3211	37.1855	45.7565	21.6139	28.0352	30.5227	42.7366
389.45	31.4794	28.7092	31.4718	44.6951	28.6697	31.9315	38.5252	47.2971	40.5516	42.5243	44.2466	50.0626	45.5748	54.5331	58.2282	58.6604	24.146	29.4005	37.1243	45.6523	21.6459	28.0018	30.4867	42.6525
389.9	31.533	28.7106	31.4756	44.7362	28.6395	31.8587	38.5654	47.3258	40.4693	42.2489	44.2121	50.0224	45.6418	54.4633	58.1354	58.6403	24.213	29.3699	36.8489	45.6092	21.6748	27.9384	30.4633	42.6037
390.35	31.6583	28.7208	31.4976	44.7295	28.6295	31.7877	38.5902	47.3257	40.389	42.0089	44.1815	50.0903	45.7317	54.404	58.0388	58.6547	24.2378	29.0763	36.6213	45.7039	21.6724	27.8586	30.4351	42.5702
390.8	31.7128	28.7165	31.5311	44.7008	28.6324	31.7674	38.6113	47.2894	40.3431	42.0395	44.1882	50.1965	45.6924	54.2367	58.0073	58.691	24.3104	28.8334	36.4998	45.6274	21.6679	27.7947	30.4469	42.5004
391.25	31.7481	28.6948	31.5559	44.6386	28.6294	31.751	38.5625	47.2473	40.2694	42.1227	44.2179	50.2481	45.6666	53.9364	58.0474	58.712	24.25	28.58	36.4855	45.6274	21.6502	27.7034	30.434	42.5176
391.7	31.8428	28.6664	31.5473	44.5277	28.6038	31.7137	38.4879	47.1833	40.1987	42.2307	44.2035	50.3256	45.6045	53.6716	58.0866	58.6958	24.1646	28.493	36.5945	45.5815	21.6099	27.639	30.3846	42.4755
392.15	31.861	28.5916	31.5024	44.4512	28.5829	31.6554	38.4487	47.1431	40.1547	42.2747	44.1634	50.1257	45.4955	53.4258	58.122	58.6566	24.129	28.646	36.6184	45.4276	21.5599	27.6124	30.3258	42.4947
392.6	31.8648	28.4957	31.423	44.413	28.5468	31.619	38.3952	47.1288	40.0638	42.1782	44.1117	49.8752	45.4256	53.4153	58.0513	58.5992	24.0638	28.8975	36.5935	45.3597	21.5148	27.5659	30.2703	42.5253
393.05	31.8648	28.4232	31.3628	44.4197	28.5257	31.5932	38.3712	47.1345	39.9816	42.0261	44.0525	49.66	45.3453	53.4698	57.9069	58.5648	24.0502	29.1414	36.5142	45.1646	21.4782	27.5705	30.2259	42.4956
393.5	31.7539	28.3712	31.3121	44.5	28.5032	31.5636	38.3741	47.1546	39.9606	41.8597	44.0285	49.4879	45.2048	53.5147	57.7615	58.5189	24.0449	29.3039	36.3478	44.9676	21.4473	27.5613	30.1897	42.5234
393.95	31.6611	28.343	31.2719	44.586	28.5154	31.5521	38.3416	47.254	39.9051	41.7354	43.9578	49.485	45.1426	53.5099	57.5942	58.4615	23.9992	29.3728	36.2474	44.8041	21.4171	27.5271	30.1562	42.4784
394.4	31.5492	28.3867	31.3015	44.63	28.5196	31.5234	38.3617	47.3764	39.8888	41.6513	43.843	49.4821	45.0833	53.3904	57.4957	58.4366	23.9537	29.2976	36.1298	44.6501	21.4316	27.5004	30.0987	42.4306
394.85	31.4536	28.4104	31.3092	44.6501	28.5854	31.445	38.3856	47.4472	39.8755	41.6293	43.7024	49.4697	45.0001	53.3263	57.4526	58.3955	23.9293	29.2588	36.0657	44.6147	21.4466	27.4523	30.0493	42.3694
395.3	31.4316	28.4457	31.3056	44.6329	28.6834	31.3713	38.3789	47.4941	39.8391	41.6235	43.5513	49.3922	45.0087	53.2661	57.4259	58.3171	23.8894	29.2371	36.0609	44.5822	21.4515	27.3784	29.9881	42.292
395.75	31.4565	28.5009	31.3134	44.5736	28.6959	31.2889	38.3961	47.3831	39.8554	41.6589	43.5102	49.3071	44.806	53.114	57.4192	58.1612	23.8977	29.248	36.0638	44.5487	21.4644	27.3316	29.9366	42.2527
396.2	31.5378	28.5005	31.2916	44.5468	28.7457	31.2229	38.3808	47.254	39.8745	41.6637	43.5293	49.2335	44.5593	52.9515	57.4029	57.9614	23.9393	29.3041	36.1279	44.4713	21.4263	27.3121	29.8973	42.2116
396.65	31.6047	28.5036	31.2841	44.5325	28.6646	31.2572	38.3607	47.1345	39.8755	41.6943	43.5265	49.1656	44.3565	52.7354	57.3188	57.7539	23.9773	29.2222	36.1259	44.237	21.3987	27.2854	29.8648	42.2088
397.1	31.6343	28.4791	31.3213	44.5296	28.5415	31.3061	38.3617	47.059	39.8707	41.7641	43.5504	49.1302	44.1356	52.5929	57.2279	57.6238	24.006	29.1605	36.1135	43.9941	21.3619	27.2987	29.8742	42.182
397.55	31.6057	28.4506	31.3402	44.5669	28.4505	31.3654	38.3407	47.0293	39.7951	41.7555	43.5236	49.0805	44.2781	52.6655	57.138	57.663	23.995	29.0566	36.06	43.7713	21.3295	27.3062	29.8672	42.1294
398	31.5033	28.417	31.3266	44.6128	28.3414	31.4086	38.311	46.9844	39.6517	41.7536	43.4968	49.0164	44.4235	52.6952	57.0376	57.7414	23.9604	28.9645	35.9978	43.7694	21.2799	27.2977	29.848	42.0692
398.45	31.4259	28.3963	31.2901	44.6683	28.2902	31.373	38.3014	46.9643	39.5274	41.636	43.5055	48.9218	44.5727	52.6818	56.9898	57.8447	23.9473	28.9768	35.9108	43.9769	21.2165	27.3237	29.8121	41.9745
398.9	31.3828	28.4275	31.2671	44.7037	28.2614	31.3431	38.2814	46.9002	39.4193	41.4696	43.4605	48.8156	44.7371	52.4953	56.9133	57.9155	23.8936	28.9536	35.8649	44.2265	21.1957	27.3328	29.7883	41.9018
399.35	31.3972	28.4214	31.2471	44.7084	28.26	31.2883	38.2527	46.8754	39.4002	41.3395	43.4089	48.7219	44.6826	52.1865	56.7785	57.9059	23.7017	28.9888	35.8869	44.435	21.2191	27.3261	29.7796	41.8492
399.8	31.4488	28.4274	31.2432	44.6874	28.2555	31.2574	38.2326	46.8744	39.4805	41.2534	43.3295	48.6263	44.6683	51.9254	56.6704	57.8581	23.4795	29.0156	35.8611	44.2839	21.2884	27.3411	29.7744	41.8282
400.25	31.5024	28.427	31.2729	44.6214	28.2575	31.2873	38.1991	46.8868	39.5503	41.2104	43.2463	48.5307	44.5526	51.7552	56.5318	57.7921	23.1898	28.9961	35.8525	44.0419	21.3659	27.3239	29.7666	41.7966
400.7	31.5464	28.3218	31.2192	44.5459	28.2818	31.2915	38.1704	46.9126	39.5934	41.1693	43.2119	48.3671	44.3202	51.6806	56.5404	57.7414	23.0226	28.943	35.7922	43.7426	21.4316	27.3312	29.72	41.7402
401.15	31.5502	28.2625	31.1705	44.4828	28.2868	31.3263	38.1245	46.8553	39.5761	41.1081	43.1784	48.1797	44.0467	51.6443	56.5968	57.6783	23.1634	28.7878	35.6861	43.4682	21.4461	27.3297	29.6851	41.6905
401.6	31.5356	28.2256	31.128	44.4388	28.2944	31.316	38.0299	46.7969	39.5312	40.9895	43.1449	48.0841	43.7283	51.5276	56.5958	57.6276	23.3336	28.6094	35.5579	43.3706	21.4399	27.3093	29.6568	41.6178
402.05	31.4941	28.1876	31.0739	44.4598	28.2596	31.1906	37.9228	46.7128	39.5044	40.9149	43.1124	48.087	43.5705	51.4224	56.6188	57.5722	23.5734	28.4782	35.5034	43.3372	21.4052	27.31	29.6241	41.6111
402.5	31.4346	28.2318	31.0746	44.4933	28.1977	31.0718	37.8109	46.6162	39.4633	40.8537	43.0034	48.2533	43.5762	51.3277	56.396	57.5023	23.7546	28.3674	35.4929	43.3792	21.3588	27.289	29.6387	41.6187
402.95	31.4046	28.2351	31.0775	44.5172	28.1252	30.9355	37.7554	46.6353	39.4279	40.803	42.9298	48.4264	43.8249	51.2503	56.1808	57.4373	23.7635	28.3038	35.4814	43.3764	21.3335	27.2767	29.618	41.613
403.4	31.4135	28.2386	31.07	44.5057	28.0464	30.8627	37.7985	46.6105	39.3457	40.76	42.8504	48.436	44.0744	51.3564	55.9742	57.379	23.768	28.2849	35.5493	43.3611	21.2994	27.2512	29.5994	41.6187
403.85	31.4521	28.2333	31.0473	44.4627	28.0333	30.9199	37.8386	46.5799	39.252	40.694	42.8619	48.3212	44.2102	51.3813	55.7438	57.3379	23.7596	28.2688	35.5292	43.2626	21.27	27.2061	29.5846	41.5231
404.3	31.4973	28.2212	31.0053	44.4292	28.0165	30.9954	37.8989	46.5808	39.1822	40.6424	42.9432	48.107	44.2752	51.3717	55.6481	57.3073	23.7377	28.2507	35.4604	43.2033	21.2114	27.1429	29.5055	41.4466
404.75	31.489	28.23	30.9535	44.3977	27.9958	31.072	37.9457	46.5072	39.1238	40.6022	42.9546	47.9358	44.0821	51.3669	55.5755	57.2767	23.7453	28.2545	35.4307	43.21	21.1442	27.0679	29.4426	41.3759
405.2	31.4574	28.19	30.9054	44.3814	27.9794	31.0909	37.9419	46.4747	39.1181	40.5449	42.9757	47.8479	43.8727	51.2225	55.5344	57.247	23.7573	28.2364	35.5723	43.254	21.1141	26.9906	29.3828	41.2841
405.65	31.3857	28.1175	30.8742	44.3766	27.9414	31.08	37.9438	46.4565	39.1018	40.4961	42.7921	47.8287	43.6919	51.0887	55.5143	57.2356	23.7436	28.178	35.7454	43.3152	21.1094	26.9098	29.3831	41.2764
406.1	31.3169	28.03	30.8597	44.3747	27.913	31.0566	37.9113	46.4508	39.076	40.4282	42.5807	47.8412	43.5064	50.8974	55.4483	57.2078	23.7365	28.1462	35.8429	43.3008	21.1531	26.8564	29.4224	41.2391
406.55	31.291	27.9535	30.8882	44.3709	27.9346	31.0367	37.8443	46.4747	39.0894	40.4158	42.3943	47.8278	43.4203	50.6115	55.3517	57.1447	23.7039	28.1021	35.8897	43.2645	21.2052	26.8708	29.4728	41.2123
407	31.2423	27.9164	30.923	44.3661	27.9419	31.0416	37.7755	46.4795	39.0569	40.4865	42.2145	47.8058	43.3601	50.3858	55.2494	57.0883	23.7081	28.0754	35.5875	43.1822	21.2329	26.9089	29.5026	41.1922
407.45	31.162	27.9644	30.8709	44.3575	27.9371	31.0127	37.7191	46.4603	39.1248	40.5391	42.1389	47.7618	43.3113	50.2041	55.1375	56.9391	23.7022	28.0638	35.3533	43.0876	21.259	26.9673	29.4566	41.1272
407.9	31.0914	28.0207	30.7972	44.3451	27.943	30.9699	37.6933	46.3982	39.2214	40.5822	42.0749	47.6671	43.3066	50.2462	55.0811	56.8014	23.7695	28.0932	35.2605	42.8973	21.3261	27.0084	29.3871	41.1377
408.35	31.0073	28.0601	30.6662	44.3212	27.8955	30.932	37.6971	46.3217	39.2529	40.4999	42.0261	47.5447	43.3754	50.359	55.0371	56.7851	23.8447	28.1527	35.1993	42.6926	21.3665	26.9979	29.3082	41.0995
408.8	30.9615	28.0792	30.5074	44.28	27.8724	30.8997	37.7114	46.2691	39.2979	40.3632	41.9668	47.4539	43.4691	50.4346	55.0017	56.7498	23.9183	28.2235	35.271	42.509	21.3933	26.9834	29.2613	41.0813
409.25	31.0446	28.0687	30.4955	44.1978	27.8335	30.9124	37.7162	46.2203	39.1573	40.2408	41.9066	47.3755	43.4825	50.4709	54.952	56.7794	24.0503	28.1705	35.2768	42.3704	21.4225	26.9679	29.2491	41.0995
409.7	31.1268	28.0461	30.4944	44.1098	27.793	30.9251	37.6799	46.1409	38.9708	40.1442	41.8569	47.3372	43.4481	50.3485	54.8889	56.8091	24.0524	28.0539	35.2347	42.3818	21.3278	26.9589	29.2636	41.0096
410.15	31.2108	28.0192	30.5233	44.0372	27.7724	30.9855	37.6416	46.0176	38.7911	40.0954	41.7928	47.3085	43.3075	50.1678	54.7856	56.7039	24.0705	27.8636	35.1974	42.4344	21.2501	26.9486	29.2637	40.9675
410.6	31.2624	27.9888	30.6038	44.0046	27.7131	31.0328	37.5814	45.8474	38.6295	40.0438	41.7402	47.2607	43.2004	50.0396	54.6192	56.5987	24.0116	27.6137	35.1171	42.5033	21.2282	26.942	29.21	40.891
411.05	31.2002	27.9358	30.6169	44.0066	27.6239	30.9959	37.5011	45.6867	38.5769	39.974	41.7096	47.2081	43.2693	49.9459	54.3725	56.503	23.9374	27.6377	35.0406	42.5033	21.193	26.9083	29.1543	40.782
411.5	31.117	27.9009	30.6321	43.9979	27.5175	30.9647	37.4743	45.6236	38.5663	39.8927	41.6618	47.101	43.2903	49.8723	54.0655	56.4026	23.9292	27.6636	34.9038	42.4306	21.2432	26.852	29.0765	40.7763
411.95	30.9984	27.9116	30.6438	44.0008	27.4153	30.8315	37.4265	45.6618	38.5673	39.8439	41.6312	47.0312	43.3151	49.8991	53.7997	56.3625	23.9008	27.7821	34.7671	42.4038	21.2779	26.8092	29.0219	40.7084
412.4	30.8971	27.967	30.6104	43.9664	27.3631	30.7171	37.3997	45.7259	38.5606	39.82	41.5709	46.9299	43.2635	49.8254	53.6457	56.3424	23.9026	27.9402	34.681	42.3006	21.2812	26.7498	29.0599	40.6625
412.85	30.8626	28.0133	30.5863	43.9205	27.4402	30.6631	37.4064	45.7833	38.5147	39.7741	41.439	46.9394	43.0359	49.7451	53.6974	56.2716	23.8748	27.9474	34.5797	42.1839	21.2576	26.7312	29.0736	40.6252
413.3	30.8464	28.0353	30.5623	43.8631	27.5146	30.6277	37.3758	45.768	38.4554	39.71	41.2831	47.058	42.8514	49.6763	53.8112	56.1827	23.8294	27.9668	34.4926	42.0299	21.1933	26.6788	29.0931	40.4904
413.75	30.9343	27.9678	30.5092	43.7885	27.5868	30.6475	37.3805	45.6991	38.3952	39.6096	41.1062	47.1192	42.6869	49.5567	53.903	56.0967	23.799	27.9062	34.3654	41.7727	21.1442	26.5895	29.0938	40.4282
414.2	31.029	27.8539	30.4367	43.7455	27.6247	30.6417	37.3844	45.6427	38.3321	39.4901	41.001	47.2253	42.5415	49.4649	53.9355	55.9752	23.7868	27.8263	34.2545	41.5881	21.0743	26.508	28.9961	40.3603
414.65	31.0816	27.7651	30.3382	43.712	27.5837	30.6214	37.3586	45.5873	38.2957	39.4289	40.9914	47.1049	42.5329	49.2985	53.859	55.8949	23.7795	27.7743	34.1742	41.4447	21.0304	26.3895	28.9999	40.3268
415.1	31.138	27.6954	30.2397	43.7139	27.5686	30.5868	37.3337	45.55	38.2737	39.3591	41.0316	46.8974	42.5253	49.1054	53.7672	55.8308	23.7893	27.7189	34.2124	41.3998	21.0107	26.4004	29.0121	40.3335
415.55	31.1008	27.7026	30.1918	43.7111	27.5467	30.5202	37.2859	45.5079	38.2642	39.2424	41.0937	46.7319	42.5195	48.8797	53.7146	55.76	23.7731	27.7305	34.3128	41.3424	20.9908	26.4398	29.0296	40.3393
416	31.0625	27.7316	30.2264	43.6757	27.548	30.4679	37.2218	45.4534	38.2431	39.1057	41.0832	46.5292	42.5396	48.7066	53.6457	55.7122	23.7202	27.8047	34.4046	41.351	20.9845	26.4696	29.0906	40.3603
416.45	31.0405	27.7567	30.2931	43.6202	27.5511	30.436	37.1817	45.4266	38.0978	38.9575	41.0373	46.4221	42.5348	48.5861	53.5664	55.6548	23.6864	27.8391	34.4936	41.2582	20.9521	26.5227	28.9995	40.3335
416.9	30.9994	27.7893	30.3385	43.5514	27.5264	30.383	37.1367	45.3788	37.9094	38.8943	40.979	46.3169	42.6343	48.4886	53.4908	55.6233	23.6155	27.8606	34.464	41.1358	20.8942	26.5213	28.8995	40.2972
417.35	30.9803	27.795	30.3467	43.4529	27.5161	30.4335	37.0956	45.3491	37.7028	38.9565	40.9245	46.2146	42.7146	48.4207	53.3722	55.543	23.5036	27.8387	34.3511	41.0392	20.8451	26.5321	28.8194	40.2207
417.8	30.9497	27.7869	30.2975	43.3869	27.4889	30.4913	37.0411	45.3271	37.5183	39.0215	40.8901	46.1314	42.7433	48.3327	53.2632	55.4779	23.3213	27.7618	34.2899	40.8231	20.7811	26.554	28.7181	40.1222
418.25	30.9114	27.7753	30.2169	43.3496	27.4766	30.5135	36.9617	45.2354	37.567	39.0636	40.8614	46.0788	42.6496	48.2839	53.1619	55.4177	23.097	27.7082	34.2325	40.8939	20.8251	26.5562	28.6782	40.0533
418.7	30.8875	27.7255	30.1634	43.2932	27.4724	30.5684	36.8795	45.178	37.6082	39.0311	40.7992	46.074	42.3378	48.1969	53.0662	55.2848	22.8866	27.6242	34.2526	40.957	20.9006	26.5532	28.6396	39.9424
419.15	30.8751	27.6779	30.1195	43.2979	27.4558	30.4739	36.7705	45.0871	37.6684	38.9766	40.7294	46.0568	42.0988	48.1414	52.984	55.1901	22.8236	27.4004	34.3377	41.1396	20.9573	26.5349	28.5641	39.8477
419.6	30.833	27.6348	30.0836	43.2836	27.4552	30.3563	36.6777	44.9781	37.722	38.9508	40.6845	46.0663	41.8578	48.0774	52.9295	55.0782	22.96	27.1535	34.3148	41.3443	21.0333	26.4936	28.5138	39.7473
420.05	30.7813	27.5896	30.0747	43.2463	27.4235	30.253	36.628	44.9542	37.6665	38.9316	40.6166	46.0606	41.7163	48.0162	52.8807	54.9558	23.139	26.902	34.2909	41.3519	21.0082	26.4254	28.4542	39.6402
420.5	30.695	27.5072	30.0699	43.2167	27.3694	30.1422	36.6289	44.9035	37.6952	38.946	40.5735	46.0137	41.7096	48.0315	52.8033	54.8831	23.3523	26.7912	34.244	41.3605	20.9849	26.3346	28.3848	39.6125
420.95	30.6144	27.4152	30.0674	43.1535	27.3273	30.087	36.6509	44.8605	37.7086	38.8915	40.5028	45.9525	41.6445	47.9722	52.7497	54.8229	23.4418	26.9865	34.2182	41.2611	20.9673	26.257	28.3625	39.5895
421.4	30.5921	27.3198	30.0597	43.0751	27.2693	30.0332	36.694	44.8299	37.7143	38.8245	40.433	45.8588	41.6226	47.9645	52.6388	54.7531	23.4445	27.1677	34.2822	41.1397	20.9442	26.2121	28.3577	39.602
421.85	30.562	27.2018	30.0251	43.0072	27.2255	29.9801	36.6815	44.74	37.742	38.7719	40.3584	45.7728	41.5595	47.8842	52.635	54.668	23.4245	27.3509	34.3243	41.1043	20.9186	26.2899	28.3827	39.5733
422.3	30.5936	27.2187	29.9707	42.9279	27.2299	29.9139	36.627	44.6367	37.7105	38.6801	40.2522	45.7058	41.4954	47.7618	52.6914	54.5953	23.3781	27.4216	34.3262	41.0402	20.9018	26.361	28.423	39.5255
422.75	30.6103	27.2351	29.8921	42.8561	27.2049	29.8744	36.5677	44.5239	37.6741	38.618	40.1796	45.6379	41.4906	47.7035	52.7105	54.5064	23.3745	27.3166	34.2153	40.9149	20.8812	26.4265	28.4022	39.4566
423.2	30.6097	27.2559	29.8169	42.815	27.1821	29.8472	36.4664	44.3938	37.6435	38.552	40.0313	45.6427	41.4667	47.5849	52.787	54.3926	23.3604	27.3021	34.0049	40.8403	20.9787	26.4876	28.3546	39.3447
423.65	30.6525	27.3278	29.7651	42.7768	27.1624	29.8377	36.3841	44.2925	37.5718	38.4458	39.9147	45.636	41.5652	47.5447	52.6436	54.3218	23.3543	27.2758	33.632	40.6682	21.1234	26.4189	28.2863	39.2931
424.1	30.6683	27.3352	29.7101	42.7576	27.1212	29.8361	36.3095	44.2188	37.5106	38.4047	39.8668	45.6494	41.6675	47.5218	52.438	54.2262	23.3709	27.2823	33.26	40.519	21.2215	26.4533	28.2088	39.2396
424.55	30.6759	27.3724	29.7111	42.7223	27.1111	29.8772	36.2474	44.1576	37.4494	38.3751	39.797	45.6131	41.6991	47.4893	52.2419	54.1497	23.3963	27.3521	33.1013	40.4789	21.3638	26.4665	28.1985	39.2415
425	30.6517	27.4188	29.7326	42.6439	27.0837	29.9164	36.212	44.1108	37.4188	38.4324	39.7789	45.462	41.7947	47.4807	52.0354	54.1449	23.42	27.3292	33.0544	40.4377	21.2398	26.4614	28.194	39.2702
425.45	30.6235	27.4265	29.7378	42.5339	27.0514	29.9258	36.1661	44.0591	37.4035	38.5673	39.776	45.2975	41.7297	47.4462	51.9493	54.1344	23.4429	27.3246	33.3728	40.4492	21.096	26.4951	28.1918	39.2596
425.9	30.5805	27.3949	29.755	42.4488	27.0257	29.9357	36.1259	44.0352	37.459	38.6218	39.7234	45.0843	41.6034	47.3353	51.8871	54.1497	23.4231	27.297	33.762	40.41	20.9781	26.3726	28.1773	39.2357
426.35	30.5438	27.3293	29.7287	42.3723	26.9813	29.8451	36.0667	44.0142	37.5508	38.662	39.6737	45.0068	41.5202	47.1957	51.8479	54.1267	23.433	27.2149	33.895	40.367	20.8092	26.2679	28.1021	39.1305
426.8	30.5602	27.2431	29.6704	42.3283	26.9422	29.7566	36.0781	44.0066	37.5479	38.531	39.6469	44.9628	41.3692	47.0704	51.8011	54.0493	23.4614	27.1932	34.0518	40.3077	20.7948	26.1983	28.01	39.0464
427.25	30.5939	27.1773	29.608	42.314	26.9117	29.6829	36.1336	43.9673	37.5317	38.312	39.557	44.9399	41.3252	46.9146	51.737	53.9355	23.5301	27.1526	34.003	40.4043	20.7669	26.1393	27.9369	39.0005
427.7	30.6194	27.1385	29.5414	42.2566	26.9213	29.6147	36.1814	43.8755	37.3614	38.1245	39.4614	44.9313	41.3472	46.8514	51.6758	53.8054	23.6317	27.1271	33.8567	40.6338	20.7397	26.1271	27.8833	38.9498
428.15	30.6453	27.1246	29.479	42.2241	26.9533	29.5747	36.2321	43.7923	37.1673	37.9428	39.3734	44.8538	41.2602	46.817	51.5773	53.6295	23.5955	27.1242	33.8481	40.8145	20.7443	26.1212	27.8673	38.9766
428.6	30.6114	27.1335	29.4358	42.1801	27.0056	29.5353	36.1355	43.6805	37.044	37.8721	39.2711	44.7974	41.153	46.7635	51.4645	53.4765	23.511	27.0722	33.7257	41.0125	20.783	26.0773	27.8627	38.9584
429.05	30.501	27.1139	29.4389	42.1275	27.0609	29.5048	36.0035	43.6059	36.9636	37.873	39.2022	44.7601	40.9981	46.7501	51.365	53.3368	23.3736	27.0218	33.6712	40.87	20.8477	26.0629	27.8517	38.9278
429.5	30.4212	27.1159	29.4617	42.0845	27.0133	29.4809	35.84	43.5562	36.9493	37.8683	39.1583	44.7037	40.8499	46.6678	51.2627	53.1991	23.2074	26.9763	33.6664	40.6395	20.8212	26.0928	27.8923	38.8953
429.95	30.3688	27.102	29.4831	42.008	26.9563	29.4686	35.6956	43.5016	36.9168	37.8797	39.1382	44.6444	40.8537	46.5875	51.168	53.2183	23.1742	27.0589	33.6406	40.3899	20.7493	26.1107	27.9296	38.7824
430.4	30.3645	27.0663	29.4705	41.9324	26.9086	29.4583	35.6134	43.45	36.8756	37.8587	39.1038	44.5841	40.9207	46.4603	51.1097	53.2202	23.1909	27.1749	33.675	40.1356	20.6444	26.1523	27.9551	38.705
430.85	30.3744	27.0358	29.3928	41.8416	26.8507	29.4472	35.535	43.3917	36.7762	37.8023	39.0512	44.4895	40.9733	46.3723	51.0648	53.2374	23.2077	27.3275	33.631	40.0294	20.5443	26.1155	27.9519	38.5998
431.3	30.3857	26.9593	29.3121	41.7469	26.8229	29.4062	35.4986	43.3104	36.6959	37.7583	39.0234	44.4502	40.9628	46.3895	51.0131	53.2364	23.2605	27.4702	33.589	39.9348	20.6384	26.0661	27.8619	38.5281
431.75	30.3688	26.8684	29.2422	41.6819	26.7776	29.3353	35.4393	43.2128	36.6366	37.6684	38.9594	44.391	40.9216	46.3255	50.9529	53.1504	23.2579	27.3562	33.5488	39.8812	20.7626	26.017	27.7579	38.5367
432.2	30.3198	26.7965	29.2345	41.5958	26.7332	29.2456	35.3953	43.1344	36.5849	37.5986	38.9441	44.3278	40.8786	46.3102	50.754	53.0767	23.2047	27.2754	33.4828	39.8764	20.845	25.9175	27.676	38.5051
432.65	30.3003	26.7435	29.2581	41.5413	26.6802	29.1278	35.3513	43.0512	36.5763	37.5384	38.9651	44.2963	40.8709	46.1773	50.5073	52.9888	23.1488	27.1359	33.4809	39.8678	20.9142	25.9733	27.6114	38.4917
433.1	30.2492	26.7448	29.2356	41.4868	26.6635	29.0214	35.2921	42.9795	36.5639	37.4867	38.9192	44.2399	40.8681	45.9535	50.2787	52.8931	23.0947	27.026	33.4885	39.9692	20.8569	26.0192	27.5686	38.4525
433.55	30.2085	26.802	29.2008	41.4007	26.6482	28.9835	35.2586	42.9336	36.5543	37.4255	38.8733	44.215	40.7686	45.8579	50.1066	52.7966	23.0482	27.0163	33.4178	40.0342	20.8085	26.085	27.5402	38.377
434	30.1435	26.8389	29.1106	41.3758	26.6306	28.9612	35.2156	42.8667	36.5381	37.2524	38.7471	44.1729	40.5649	45.7775	50.14	52.7067	23.0405	26.9561	33.3403	39.9654	20.8047	26.1998	27.4934	38.3387
434.45	30.1009	26.8924	29.0104	41.3414	26.6288	28.9556	35.2089	42.8198	36.4625	37.0679	38.6094	44.128	40.3039	45.6924	50.1936	52.6216	23.0302	26.964	33.216	39.9233	20.7864	26.1131	27.4483	38.3034
434.9	30.0979	26.9023	28.9522	41.3099	26.5659	28.9672	35.2098	42.7806	36.2866	36.9101	38.5099	44.0802	40.1145	45.5825	50.2318	52.5671	23.0139	26.921	33.1003	39.6517	20.8299	26.0478	27.4138	38.3206
435.35	30.0712	26.8459	28.9013	41.2754	26.4381	28.9411	35.1897	42.8036	36.0839	36.8718	38.4458	43.975	40.0199	45.4113	50.2146	52.5106	23.016	26.9107	33.1127	39.4356	20.8594	25.9391	27.3626	38.3014
435.8	30.1523	26.8022	28.8784	41.2095	26.2713	28.9194	35.1869	42.8571	35.8706	37.0287	38.4277	43.843	40.0246	45.242	50.1018	52.4188	22.9641	26.9429	33.1185	39.3715	20.861	25.829	27.3184	38.2584
436.25	30.1993	26.723	28.8752	41.133	26.09	28.9046	35.141	42.86	35.7654	37.1931	38.4162	43.6604	40.0801	45.1589	49.988	52.3557	23.0175	26.9216	33.1166	39.3161	20.86	25.7833	27.2535	38.2068
436.7	30.2021	26.6723	28.8576	41.0698	26.005	28.8679	35.0807	42.8638	35.8257	37.2964	38.3952	43.4701	40.0916	45.0288	49.8704	52.3003	23.0343	26.9292	33.1644	39.3763	20.7895	25.7058	27.2246	38.0614
437.15	30.2382	26.6615	28.8584	41.0488	26.071	28.8504	35.0224	42.7232	35.8725	37.2916	38.3407	43.385	40.0313	44.8634	49.7805	52.2152	23.0861	26.9299	33.1625	39.405	20.7362	25.6675	27.2191	37.9935
437.6	30.1718	26.6618	28.8991	41.0297	26.1569	28.8168	34.943	42.5769	35.9299	37.1903	38.2842	43.4098	39.972	44.6186	49.6963	52.1387	23.2397	26.891	33.2504	39.3266	20.7221	25.6212	27.2388	37.9409
438.05	30.1288	26.6926	28.9087	41.0115	26.2596	28.795	34.8512	42.4813	35.9003	37.0879	38.2087	43.4701	39.8936	44.4044	49.6256	52.0373	23.218	26.8817	33.392	39.2596	20.7399	25.5982	27.3383	37.8979
438.5	30.0883	26.6902	28.9161	40.9742	26.3159	28.792	34.7805	42.3866	35.8266	37.0095	38.1341	43.5466	39.7942	44.3709	49.5606	51.9111	23.2234	26.8165	33.4101	39.2319	20.7981	25.5834	27.3696	37.9084
438.95	30.0263	26.6745	28.9018	40.9025	26.2986	28.7296	34.726	42.3474	35.8228	36.9541	38.0595	43.5676	39.7225	44.4034	49.5013	51.9589	23.1361	26.7968	33.4599	39.2673	20.8275	25.5527	27.3853	37.8338
439.4	30.0057	26.6397	28.7828	40.7973	26.291	28.6575	34.6705	42.2671	35.8027	36.9168	37.9763	43.538	39.6383	44.5239	49.4276	52.0631	22.9874	26.8077	33.3834	39.3333	20.8156	25.5452	27.3674	37.7583
439.85	29.9657	26.5615	28.7733	40.6988	26.2735	28.5404	34.6466	42.161	35.8104	36.8747	37.8855	43.5179	39.5322	44.6281	49.354	52.1272	22.935	26.9443	33.2543	39.3629	20.758	25.5673	27.2598	37.6789
440.3	29.992	26.4938	28.7784	40.6118	26.2798	28.3939	34.6083	42.0653	35.8171	36.8374	37.7994	43.4997	39.4949	44.6176	49.2832	52.2075	22.8732	27.1768	33.1653	39.3811	20.6602	25.5835	27.2487	37.6024
440.75	30.0125	26.4289	28.7849	40.5334	26.2713	28.3328	34.5309	41.9793	35.7549	36.8221	37.7229	43.4739	39.4949	44.5593	49.1857	52.0229	22.842	27.2872	33.0018	39.252	20.5851	25.6152	27.2506	37.5594
441.2	30.0361	26.3703	28.8587	40.4932	26.2579	28.3083	34.4716	41.9219	35.709	36.7896	37.6646	43.4137	39.4394	44.4617	49.113	51.7743	22.8112	27.3619	32.9043	39.1716	20.5449	25.7125	27.2585	37.5096
441.65	30.0556	26.3504	28.7662	40.454	26.2544	28.3213	34.3999	41.8655	35.666	36.7628	37.6053	43.3611	39.4604	44.2915	48.9887	51.5639	22.7838	27.162	32.8058	39.1286	20.5578	25.7777	27.2773	37.4771
442.1	30.0209	26.3556	28.6447	40.4272	26.1936	28.3634	34.3406	41.7957	35.5962	36.7332	37.6301	43.2855	39.4088	44.1682	48.8634	51.3478	22.769	26.932	32.712	39.0875	20.6461	25.8393	27.1841	37.4523
442.55	30.003	26.3511	28.5383	40.3957	26.2032	28.351	34.3272	41.7373	35.5675	36.7026	37.6588	43.2253	39.3323	44.0381	48.7506	51.2742	22.7778	26.7764	32.6145	39.2099	20.8051	25.8949	27.0728	37.4743
443	29.9384	26.3489	28.4316	40.3469	26.2241	28.3266	34.3081	41.6933	35.5331	36.6653	37.6378	43.1794	39.3686	43.9205	48.6253	51.2283	22.8103	26.6634	32.5533	39.3027	20.9349	25.7784	26.9694	37.5077
443.45	29.8788	26.3299	28.3816	40.2981	26.2176	28.2973	34.2756	41.6618	35.5197	36.7045	37.6388	43.1	39.3113	43.8277	48.5842	51.1805	22.8207	26.6783	32.4864	39.3313	21.0353	25.6503	26.9072	37.4943
443.9	29.8183	26.302	28.3557	40.2264	26.2719	28.277	34.2	41.6694	35.5082	36.7552	37.4858	43.0378	39.295	43.7283	48.5507	51.1212	22.8342	26.6536	32.6097	39.2166	21.0803	25.5332	26.8714	37.4274
444.35	29.7613	26.2799	28.3006	40.1528	26.2297	28.2653	34.1063	41.6857	35.5981	36.7504	37.3299	42.9604	39.3036	43.7254	48.502	51.016	22.8561	26.6305	32.7188	39.0665	20.9892	25.3975	26.8398	37.2983
444.8	29.6882	26.2408	28.2353	40.1021	26.1626	28.2395	33.9973	41.6771	35.7157	36.7303	37.195	42.8896	39.1736	43.7063	48.4455	50.9271	22.8741	26.5618	32.7828	38.8743	20.9102	25.3364	26.8132	37.1606
445.25	29.6064	26.2168	28.197	40.0533	26.1301	28.2105	33.9074	41.6302	35.7559	36.5811	37.0583	42.8265	39.142	43.7503	48.3604	50.8467	22.9423	26.5262	32.8871	38.8427	20.8308	25.3095	26.7793	37.0832
445.7	29.5305	26.1861	28.1698	40.016	26.0508	28.1524	33.8844	41.4935	35.7989	36.4185	36.9741	42.7816	39.1563	43.799	48.2753	50.7827	22.9588	26.5162	32.6461	39.0148	20.7475	25.2994	26.7817	37.0841
446.15	29.4396	26.1691	28.1912	39.9912	26.0119	28.0864	33.851	41.3242	35.6526	36.2904	36.9043	42.7491	39.1449	43.8689	48.2371	50.753	23.0066	26.4847	32.6184	39.1085	20.7006	25.3116	26.7845	37.153
446.6	29.4676	26.1815	28.2136	39.929	25.9878	27.9628	33.829	41.1674	35.4852	36.2206	36.8871	42.6898	39.2616	43.998	48.2151	50.6899	23.0054	26.4874	32.516	39.2482	20.6339	25.3358	26.8251	37.2113
447.05	29.5319	26.1749	28.2307	39.8296	25.9397	27.8357	33.8165	41.0603	35.3819	36.1747	36.8546	42.5626	39.2749	44.0917	48.1826	50.6105	22.9614	26.4849	32.3802	39.1822	20.5707	25.3474	26.8344	37.2247
447.5	29.6095	26.1793	28.2315	39.6976	25.9162	27.7154	33.7572	40.9981	35.3045	36.1269	36.8441	42.3952	39.2874	44.1567	48.1414	50.5101	23.0349	26.4807	32.4022	39.0081	20.5198	25.3958	26.8322	37.1616
447.95	29.6949	26.1868	28.1727	39.5752	25.8958	27.6279	33.7114	40.9656	35.2787	36.0858	36.8336	42.2996	39.3027	44.0171	48.0688	50.4212	22.9779	26.5128	32.2511	38.8656	20.4873	25.4352	26.8305	37.0191
448.4	29.7311	26.1751	28.1119	39.4777	25.8663	27.6894	33.6635	40.9235	35.2519	36.0112	36.7762	42.2623	39.274	43.8124	48.0037	50.3533	22.9485	26.5168	32.2397	38.6591	20.4865	25.4439	26.7315	36.8948
448.85	29.7512	26.2349	28.0516	39.4356	25.8688	27.7517	33.609	40.8709	35.2098	35.9834	36.7312	42.4038	39.3381	43.5772	47.9416	50.2586	22.912	26.5219	32.2626	38.4908	20.4677	25.4594	26.7521	36.7638
449.3	29.7167	26.2957	27.9848	39.4117	25.8601	27.8191	33.566	40.8136	35.119	35.9787	36.6796	42.5588	39.296	43.3907	47.8823	50.118	22.7792	26.5259	32.3114	38.3502	20.4159	25.3953	26.7814	36.6834
449.75	29.684	26.3296	27.9388	39.36	25.8552	27.8362	33.5163	40.7352	35.053	35.9777	36.6127	42.5521	39.2415	43.3381	47.8154	49.9268	22.762	26.5868	32.3611	38.2527	20.3688	25.3102	26.8133	36.6615
450.2	29.6146	26.3537	27.8973	39.2979	25.8617	27.7682	33.479	40.6634	34.987	35.9672	36.5476	42.5205	39.1784	43.2932	47.7293	49.7183	22.7692	26.6409	32.341	38.2278	20.3196	25.2616	26.909	36.5955
450.65	29.5289	26.2585	27.8595	39.1831	25.8046	27.7062	33.4446	40.5697	34.923	35.928	36.475	42.3799	39.0856	43.2807	47.6509	49.5883	22.7825	26.6103	32.364	38.2986	20.2897	25.1846	26.8027	36.5601
451.1	29.5403	26.1189	27.8351	39.1047	25.7363	27.6537	33.4015	40.5066	34.879	35.839	36.4434	42.2623	39.0416	43.2109	47.5648	49.5787	22.8213	26.5627	32.3917	38.3426	20.3246	25.1342	26.6828	36.5056
451.55	29.5389	26.0104	27.8156	39.0473	25.6536	27.6644	33.369	40.4884	34.8369	35.753	36.3956	42.2183	39.0167	43.1497	47.4616	49.5892	22.8082	26.3743	32.473	38.3186	20.3693	25.1261	26.558	36.4453
452	29.561	25.928	27.7929	39.011	25.5682	27.6718	33.2982	40.476	34.7642	35.6382	36.4482	42.1676	38.9259	43.0522	47.3984	49.6265	22.783	26.247	32.605	38.2775	20.4203	25.1072	26.3983	36.4568
452.45	29.5839	25.8892	27.7401	39.0311	25.5415	27.6727	33.1854	40.475	34.7011	35.5436	36.5132	42.1351	38.8131	42.9154	47.3143	49.6218	22.7661	26.184	32.6422	38.1685	20.4698	25.0986	26.3468	36.4568
452.9	29.5435	25.9043	27.6593	39.0244	25.5575	27.649	33.0429	40.4578	34.6026	35.4938	36.497	42.0749	38.683	42.7471	47.3535	49.572	22.7518	26.2465	32.7522	38.1867	20.4957	25.0955	26.2902	36.4635
453.35	29.5329	25.8848	27.5799	38.9919	25.5665	27.546	32.8813	40.3698	34.5596	35.4202	36.5075	42.0491	38.4841	42.6314	47.452	49.5424	22.7584	26.3505	32.7627	38.245	20.5077	25.065	26.2288	36.408
453.8	29.5425	25.8538	27.5005	38.945	25.5853	27.409	32.7522	40.2713	34.5605	35.4546	36.3602	42.0252	38.3932	42.6161	47.472	49.506	22.7498	26.4254	32.713	38.465	20.5181	25.0393	26.1975	36.2981
454.25	29.545	25.8403	27.4531	38.8637	25.6072	27.26	32.6681	40.1795	34.5892	35.491	36.1938	41.9926	38.3512	42.6104	47.5352	49.4659	22.7363	26.505	32.7053	38.7203	20.5442	25.0263	26.1441	36.2177
454.7	29.5485	25.7994	27.3792	38.8016	25.6014	27.134	32.6748	40.0552	34.7068	35.5206	36.081	41.9869	38.3971	42.7165	47.3869	49.3989	22.7437	26.4025	32.4739	38.8226	20.5761	25.0047	26.0905	36.1049
455.15	29.5198	25.8213	27.3142	38.7528	25.6087	27.1025	32.6987	39.9692	34.7126	35.5895	35.9634	41.9668	38.5271	42.6295	47.1976	49.3186	22.7311	26.3528	32.3114	38.9498	20.5962	25.0087	26.0874	36.0906
455.6	29.4502	25.8574	27.2575	38.684	25.5988	27.1361	32.7197	39.8869	34.6963	35.5703	35.8878	41.9314	38.6811	42.5406	47.0465	49.1981	22.6944	26.3069	32.145	38.6811	20.6694	25.0216	26.081	36.1049
456.05	29.4027	25.889	27.1995	38.6227	25.5567	27.1851	32.7369	39.8057	34.5825	35.5407	35.8429	41.8855	38.77	42.4612	46.8534	49.1082	22.6382	26.2638	31.9509	38.4392	20.7065	25.036	26.1056	36.0638
456.5	29.3777	25.9309	27.2509	38.5434	25.5233	27.2322	32.6939	39.7569	34.4094	35.513	35.775	41.8014	38.748	42.3426	46.7338	49.0308	22.5193	26.2948	31.903	38.2202	20.7396	25.0439	26.1414	36.0676
456.95	29.3692	25.8876	27.2894	38.4726	25.4924	27.2218	32.6403	39.7014	34.2784	35.4384	35.7042	41.7201	38.7059	42.3579	46.6554	48.9591	22.4561	26.2749	31.9059	37.9792	20.8134	25.0075	26.1034	35.9806
457.4	29.3797	25.8273	27.3163	38.4172	25.4779	27.1955	32.5858	39.6632	34.1493	35.3858	35.6688	41.6895	38.5348	42.312	46.6076	48.9275	22.4557	26.2451	31.9279	38.0203	20.729	24.9754	26.1745	35.8955
457.85	29.3849	25.7604	27.3259	38.3043	25.4687	27.1839	32.5304	39.6182	34.0795	35.3361	35.6172	41.6426	38.4391	42.27	46.5598	48.872	22.4889	26.2343	31.9958	38.0404	20.6892	24.9298	26.2283	35.8362
458.3	29.3695	25.6966	27.2917	38.202	25.4397	27.1574	32.4969	39.5742	34.0059	35.2663	35.5656	41.5365	38.4095	42.1973	46.5483	48.8319	22.5592	26.1973	32.0015	38.0318	20.6691	24.8681	26.2737	35.7692
458.75	29.3327	25.677	27.2661	38.1073	25.4163	27.1269	32.4558	39.5369	33.9676	35.2203	35.5005	41.373	38.3454	42.1026	46.4929	48.764	22.5842	26.2291	31.9633	37.9897	20.6178	24.8277	26.3516	35.7406
459.2	29.2676	25.6503	27.2538	38.0327	25.45	27.0817	32.4166	39.4834	33.9284	35.1811	35.4441	41.1502	38.3282	42.0108	46.4163	48.7228	22.5822	26.2553	31.9461	37.8893	20.6703	24.7544	26.2193	35.6803
459.65	29.1947	25.6371	27.2414	38.0834	25.508	27.0047	32.3621	39.4365	33.8864	35.1238	35.3992	40.978	38.2565	41.9639	46.358	48.6683	22.5744	26.2518	31.9413	37.7114	20.6822	24.6886	26.0843	35.6736
460.1	29.1225	25.6056	27.1953	38.114	25.5812	26.9272	32.3037	39.4031	33.8806	35.0769	35.381	40.9694	38.1322	41.9343	46.2825	48.6894	22.5571	26.2727	32.0188	37.6808	20.6503	24.6773	25.973	35.6344
460.55	29.1642	25.5597	27.1688	38.1245	25.6377	26.8529	32.276	39.3667	33.8472	35.0186	35.3638	40.9981	38.0987	41.9152	46.227	48.785	22.5296	26.1927	32.0934	37.6455	20.6316	24.6737	25.8581	35.5943
461	29.2541	25.5282	27.1312	38.1083	25.5589	26.7527	32.2129	39.4059	33.8376	34.9908	35.3007	41.0679	38.0643	41.962	46.1687	48.8061	22.5143	26.1294	32.1536	37.6904	20.6125	24.6966	25.8437	35.5847
461.45	29.3542	25.4876	27.0827	38.0184	25.4447	26.683	32.1708	39.4528	33.8357	34.9841	35.2251	41.1282	38.1092	41.9429	46.1075	48.8061	22.4967	26.0846	32.1096	37.8004	20.615	24.7175	25.8385	35.4805
461.9	29.4619	25.4267	27.0687	37.961	25.3147	26.6194	32.1259	39.4748	33.8175	34.9813	35.1974	41.1167	38.2508	41.9094	46.0338	48.6148	22.4883	26.0796	32.079	37.7153	20.6184	24.7063	25.7817	35.4087
462.35	29.3891	25.372	27.0076	37.9333	25.2047	26.577	32.0628	39.4958	33.8003	34.9755	35.2146	41.109	38.3349	41.8674	45.9535	48.3595	22.5146	26.1499	32.102	37.4877	20.5544	24.7096	25.7453	35.3227
462.8	29.2829	25.3197	26.9507	37.9142	25.1585	26.5989	32.0628	39.3744	33.696	34.855	35.2643	41.0631	38.4516	41.7297	45.9745	48.151	22.513	26.2216	32.1087	37.1683	20.4849	24.7001	25.7009	35.2462
463.25	29.1908	25.2685	26.974	37.8969	25.1392	26.5935	32.0369	39.2319	33.5975	34.7107	35.3217	40.9847	38.3856	41.6197	46.0051	47.9951	22.5069	26.2554	32.1603	36.8948	20.3959	24.6883	25.6475	35.2242
463.7	29.0856	25.2106	26.9713	37.8463	25.1399	26.6162	31.991	39.0913	33.4809	34.5576	35.2567	40.8834	38.1542	41.5203	46.0711	47.9244	22.5184	26.2451	31.9958	36.8412	20.3269	24.6803	25.6568	35.1897
464.15	29.0446	25.1601	26.9952	37.7669	25.1207	26.6174	31.948	38.9661	33.414	34.4477	35.1611	40.8097	37.9256	41.417	46.1199	47.8632	22.5075	26.1892	31.664	37.1606	20.3868	24.652	25.6415	35.2127
464.6	29.0072	25.0959	27.021	37.6875	25.0884	26.5875	31.8782	38.8934	33.479	34.4505	35.0664	40.7638	37.6722	41.3242	45.9736	47.7867	22.5131	26.1064	31.3981	37.4743	20.4192	24.6189	25.6246	35.185
465.05	28.9146	25.0483	26.9764	37.6234	25.0517	26.5835	31.8141	38.8178	33.5383	34.4926	34.9622	40.7428	37.5613	41.2334	45.8177	47.6805	22.5192	26.0424	31.205	37.7516	20.4584	24.5931	25.5971	35.1448
465.5	28.8506	25.0977	26.9289	37.5699	25.0481	26.5272	31.7701	38.7566	33.6033	34.55	34.9182	40.7552	37.6196	41.1511	45.6131	47.6203	22.5187	25.9762	31.3073	37.8922	20.4775	24.5915	25.5189	35.1238
465.95	28.8095	25.1579	26.8811	37.5297	25.044	26.498	31.7348	38.6572	33.5889	34.594	34.8876	40.7504	37.6531	41.0784	45.4438	47.5696	22.5611	25.9201	31.4833	37.8759	20.4108	24.5766	25.5277	35.1238
466.4	28.7785	25.237	26.8296	37.4427	25.1532	26.4844	31.6946	38.5855	33.5077	34.6112	34.8445	40.7256	37.7181	41.0804	45.3444	47.5419	22.5958	25.8818	31.6277	37.8711	20.3864	24.5656	25.5565	35.1754
466.85	28.8232	25.2784	26.7858	37.3337	25.2618	26.4435	31.6707	38.5214	33.412	34.5988	34.7833	40.7218	37.7736	41.0823	45.2392	47.5505	22.7512	25.8571	31.7472	37.8128	20.3777	24.5428	25.5882	35.2184
467.3	28.8479	25.2828	26.7802	37.2438	25.3006	26.4534	31.6315	38.4478	33.3126	34.571	34.7174	40.6806	37.7229	41.0679	45.1875	47.5094	22.9119	25.8449	31.7261	37.7172	20.3793	24.4939	25.6579	35.25
467.75	28.8895	25.2525	26.7711	37.1405	25.3607	26.4387	31.5722	38.399	33.2476	34.5424	34.6313	40.5898	37.7114	41.0794	45.1091	47.4721	22.9995	25.8743	31.794	37.6015	20.3848	24.4551	25.5723	35.1745
468.2	28.9284	25.207	26.7549	37.1491	25.255	26.345	31.5148	38.3292	33.1931	34.5012	34.5538	40.5793	37.6818	41.0383	45.0546	47.4204	23.0869	25.8641	31.7434	37.4886	20.3973	24.4286	25.461	35.0693
468.65	28.9033	25.2077	26.7485	37.174	25.1336	26.2681	31.4785	38.2928	33.1386	34.4486	34.5031	40.5362	37.6387	40.9924	45.025	47.3229	22.9291	25.9211	31.6123	37.4284	20.4743	24.4172	25.3826	34.9889
469.1	28.8989	25.181	26.7157	37.1711	25.0163	26.1599	31.4574	38.2479	33.0879	34.4133	34.4553	40.6166	37.6158	40.9627	44.9561	47.254	22.7258	25.9907	31.4938	37.5087	20.5829	24.4094	25.2865	34.8771
469.55	28.8562	25.1968	26.6975	37.1759	24.8775	26.0584	31.4214	38.2747	33.0276	34.3741	34.4276	40.7944	37.5689	40.9455	44.8672	47.1833	22.5434	26.0005	31.2958	37.5919	20.7015	24.4074	25.2685	34.7709
470	28.8207	25.1947	26.685	37.1233	24.8103	26.0579	31.3203	38.3206	32.9607	34.3368	34.4037	40.8403	37.4791	40.9369	44.7792	47.0876	22.3773	26.0688	31.2403	37.7095	20.7615	24.3993	25.2493	34.6695
470.45	28.8298	25.1057	26.6571	37.0784	24.7618	26.0669	31.1781	38.3225	32.9129	34.3282	34.3425	40.8862	37.4628	40.9886	44.6817	46.9337	22.3367	25.969	31.2738	37.8453	20.6861	24.3746	25.1962	34.5309
470.9	28.8091	25.0241	26.6282	37.0459	24.7569	26.0846	31.0399	38.3483	32.887	34.3224	34.2488	40.7399	37.4772	41.0641	44.6272	46.7692	22.3388	25.8477	31.3714	37.853	20.5765	24.3579	25.1432	34.4419
471.35	28.7278	24.9238	26.5851	37.0143	24.7622	26.1117	30.9566	38.2412	32.8784	34.2832	34.1168	40.5028	37.394	41.0603	44.5746	46.5827	22.3781	25.7917	31.6009	37.7889	20.4792	24.3754	25.0911	34.3817
471.8	28.6265	24.8463	26.557	36.9856	24.7672	26.0921	31.0032	38.1255	32.8976	34.3253	33.9686	40.3345	37.3787	41.0698	44.4206	46.4469	22.3945	25.7192	31.751	37.7057	20.4041	24.3937	25.0436	34.3109
472.25	28.5036	24.8824	26.5241	36.9273	24.7648	26.0635	31.0533	38.0213	32.9062	34.4075	33.8997	40.1662	37.1893	40.9867	44.2418	46.4661	22.4066	25.7389	31.948	37.6349	20.4054	24.4264	25.022	34.2756
472.7	28.3919	24.9271	26.4956	36.8661	24.7646	26.038	31.0971	37.8941	32.8612	34.4601	33.9303	40.0945	37.044	40.8489	44.0161	46.4862	22.3955	25.7775	32.0188	37.5986	20.4136	24.4285	25.0009	34.1962
473.15	28.4645	24.9682	26.4707	36.802	24.7601	25.9938	31.1108	37.8415	32.7981	34.5481	33.9915	40.0868	37.1291	40.7399	43.8794	46.5569	22.3468	25.7958	31.8906	37.6091	20.4134	24.3698	24.9839	34.1216
473.6	28.5534	25.0303	26.4285	36.7246	24.7358	25.9704	31.0646	37.7975	32.6738	34.4859	34.069	40.0849	37.1855	40.6414	43.9501	46.6019	22.3189	25.7996	31.774	37.6187	20.4279	24.3112	24.9931	34.0738
474.05	28.625	25.0235	26.408	36.6662	24.7006	25.9264	31.0336	37.7478	32.5505	34.3626	34.0872	40.0839	37.372	40.5821	44.0324	46.5885	22.3048	25.8417	31.51	37.5068	20.4161	24.2534	24.9616	34.0202
474.5	28.705	24.9846	26.3807	36.6184	24.6432	25.8945	31.0045	37.7296	32.4959	34.2603	34.0183	40.0648	37.4064	40.5515	44.1557	46.5904	22.3167	25.8499	31.3197	37.4006	20.4117	24.219	24.8981	34.0279
474.95	28.6598	24.9398	26.3637	36.5037	24.5971	25.8525	30.9746	37.6933	32.4519	34.1484	33.9533	40.0246	37.304	40.5143	44.2227	46.5407	22.3455	25.8287	31.2222	37.2735	20.3962	24.2311	24.8274	34.0939
475.4	28.6165	24.8726	26.3525	36.3927	24.5835	25.7316	30.9389	37.6397	32.4711	34.0872	33.8997	39.9921	37.1998	40.4483	44.1988	46.4957	22.3359	25.8369	31.1945	37.1071	20.2918	24.3026	24.7491	34.1465
475.85	28.6582	24.8488	26.3519	36.2904	24.5852	25.6303	30.8953	37.6206	32.4778	34.0499	33.8577	39.9634	37.0679	40.3498	44.1806	46.4355	22.3673	25.7945	31.2308	37.0306	20.1942	24.3614	24.7142	34.1665
476.3	28.7021	24.8645	26.3677	36.1833	24.5718	25.4872	30.8425	37.5594	32.4701	34.0279	33.8682	39.9443	37.0267	40.2331	44.1347	46.3236	22.3684	25.7747	31.2853	36.9904	20.1061	24.426	24.6361	34.1522
476.75	28.7835	24.9191	26.3559	36.2321	24.5625	25.406	30.7999	37.4953	32.4472	33.9992	33.8682	39.9271	36.8661	40.1384	44.0945	46.2136	22.4598	25.7786	31.3733	36.9789	20.0489	24.4523	24.5372	34.0547
477.2	28.8663	24.9634	26.3458	36.2789	24.5571	25.4533	30.7661	37.4724	32.385	34.0097	33.8558	39.8238	36.6414	40.0361	44.0352	46.0941	22.6357	25.747	31.4383	37.0411	20.1565	24.345	24.4288	33.9791
477.65	28.828	24.9815	26.3113	36.3191	24.5425	25.4924	30.7463	37.4217	32.3487	33.9973	33.8586	39.7607	36.3669	39.9749	43.9482	45.9688	22.7187	25.7382	31.4976	37.109	20.2694	24.2502	24.2872	33.9877
478.1	28.7763	24.9603	26.2489	36.3545	24.5376	25.5703	30.7167	37.4054	32.2856	33.9772	33.8022	39.7378	36.1785	39.994	43.8755	45.9124	22.8096	25.7515	31.5311	37.1281	20.3421	24.172	24.3118	33.9676
478.55	28.6977	24.8732	26.1739	36.299	24.5118	25.5988	30.6649	37.4112	32.2636	33.9705	33.7458	39.7024	36.2512	40.0342	43.7866	45.8818	22.7284	25.8018	31.5282	37.1252	20.3972	24.1092	24.3636	33.9734
479	28.6127	24.8593	26.1025	36.2684	24.4573	25.5778	30.5958	37.3605	32.233	33.9265	33.6731	39.7999	36.4071	40.1776	43.6805	45.8674	22.562	25.872	31.4727	37.0545	20.359	24.0978	24.4314	33.9485
479.45	28.5789	24.8583	26.0477	36.234	24.4073	25.5747	30.5022	37.3021	32.1861	33.9303	33.6109	39.8525	36.6184	40.3144	43.6393	45.8292	22.4293	25.9603	31.4364	36.9981	20.3399	24.0982	24.531	33.8433
479.9	28.5443	24.9062	26.0208	36.2024	24.3848	25.5591	30.462	37.2199	32.1641	33.9179	33.5966	39.8267	36.7408	40.3249	43.5724	45.7412	22.3146	25.9337	31.3551	36.9521	20.3365	24.054	24.5313	33.7659
480.35	28.5534	24.9952	26.0604	36.1757	24.3771	25.5444	30.4589	37.13	32.1115	33.8548	33.5478	39.8018	36.7303	40.3077	43.5284	45.5997	22.247	25.8002	31.2222	36.9598	20.3342	24.0065	24.5263	33.6941
480.8	28.5478	24.9723	26.095	36.1039	24.3451	25.5127	30.4617	37.065	32.0895	33.7161	33.4771	39.7205	36.716	40.1231	43.5188	45.4524	22.2148	25.6421	31.1715	37.0564	20.3627	23.9859	24.5143	33.6348
481.25	28.5674	24.9304	26.1042	36.0255	24.2503	25.467	30.4907	37.0363	32.0685	33.5067	33.3652	39.6192	36.738	39.9367	43.5628	45.3463	22.1937	25.4368	31.0969	37.086	20.3552	23.9244	24.5017	33.5794
481.7	28.5855	24.866	26.0835	35.9385	24.1311	25.4122	30.4556	37.0067	32.0714	33.2696	33.2198	39.5637	36.7886	39.8066	43.6518	45.2937	22.1733	25.4123	31.1524	37.0459	20.3984	23.9123	24.5021	33.5201
482.15	28.5244	24.7986	26.0164	35.8544	23.9905	25.3403	30.3874	36.9732	32.0876	33.1146	33.1519	39.5197	36.8259	39.6775	43.69	45.353	22.2212	25.4672	31.3293	36.824	20.4363	23.9141	24.5086	33.5134
482.6	28.4888	24.7762	25.9488	35.8094	23.9416	25.2085	30.3378	36.9474	32.1086	33.1644	33.1682	39.4652	36.824	39.6354	43.7311	45.3864	22.2569	25.578	31.5311	36.475	20.4366	23.9276	24.4875	33.4943
483.05	28.4163	24.7615	25.887	35.7836	24.0136	25.092	30.2851	36.8757	32.1459	33.2485	33.1739	39.4566	36.6825	39.5848	43.581	45.418	22.2993	25.6874	31.7529	36.1623	20.4601	23.9717	24.4155	33.501
483.5	28.3728	24.7336	25.8538	35.7893	24.0742	24.9854	30.2715	36.8259	32.0886	33.4006	33.2112	39.448	36.5123	39.5207	43.3945	45.4132	22.3185	25.6865	31.8208	36.0456	20.4031	23.9666	24.3397	33.4885
483.95	28.3786	24.6927	25.8312	35.8113	24.1585	24.9306	30.2689	36.7772	32.0063	33.5211	33.1997	39.4251	36.3669	39.4432	43.2434	45.3291	22.2952	25.6794	31.7979	36.2483	20.325	24.0175	24.2567	33.3575
484.4	28.3824	24.6409	25.8102	35.8171	24.1648	25.0028	30.243	36.736	31.9021	33.5239	33.129	39.3878	36.2904	39.3706	43.0885	45.2698	22.2813	25.6182	31.5789	36.5237	20.2664	24.0542	24.2028	33.259
484.85	28.4154	24.5889	25.8521	35.8056	24.1293	25.051	30.1824	36.7226	31.7606	33.5431	33.1003	39.3333	36.3507	39.3285	43.0388	45.1856	22.2445	25.6081	31.4115	36.8173	20.1838	24.0877	24.2164	33.1233
485.3	28.4135	24.5973	25.8892	35.7377	24.1356	25.1036	30.1021	36.6691	31.6659	33.522	33.064	39.2568	36.3545	39.3266	43.0034	45.0862	22.2233	25.6581	31.292	36.9674	20.1424	24.1352	24.2317	33.0276
485.75	28.3951	24.6094	25.9174	35.6468	24.1397	25.1295	30.0334	36.5802	31.6276	33.4752	33.0295	39.1889	36.3774	39.361	42.99	44.9925	22.2353	25.6782	31.2499	36.9091	20.1292	24.058	24.2445	33.0381
486.2	28.3565	24.6465	25.9333	35.5541	24.1617	25.0944	29.9772	36.4654	31.5827	33.4513	33.0066	39.1726	36.4109	39.3763	42.9537	44.9131	22.2221	25.7264	31.2824	36.8403	20.1245	23.971	24.2363	33.0152
486.65	28.2979	24.6824	25.8656	35.4795	24.1727	25.0868	30.03	36.3411	31.5597	33.39	32.9578	39.1525	36.4444	39.3916	42.925	44.8481	22.2015	25.702	31.1992	36.736	20.1593	23.8749	24.193	33.0468
487.1	28.2962	24.5977	25.8495	35.4565	24.1504	25.0751	30.0943	36.2675	31.5626	33.3308	32.8861	39.1707	36.6242	39.3878	42.9202	44.8175	22.0416	25.6113	31.2165	36.6643	20.2006	23.7815	24.1625	33.0429
487.55	28.3344	24.5214	25.8376	35.4365	24.1151	25.0496	30.1287	36.2474	31.4899	33.304	32.8459	39.1879	36.7609	39.4346	42.8963	44.7964	21.8271	25.5425	31.1132	36.6615	20.2309	23.7518	24.1352	33.0085
488	28.3936	24.4354	25.8441	35.425	24.0874	25.0247	30.1579	36.2493	31.4364	33.2447	32.8115	39.1764	36.8135	39.4298	42.881	44.741	21.6293	25.4211	31.0644	36.6959	20.2721	23.7275	24.1033	32.9836
488.45	28.4585	24.3454	25.8792	35.3953	24.0578	24.9909	30.0553	36.2866	31.4153	33.1959	32.7981	39.163	36.824	39.3887	42.8475	44.6903	21.4713	25.3819	31.0692	36.76	20.2498	23.7061	24.0646	32.911
488.9	28.4339	24.3382	25.8049	35.3399	24.0424	24.9656	29.9604	36.3191	31.3714	33.1433	32.8125	39.0655	36.6672	39.3419	42.7777	44.6224	21.5851	25.364	30.9382	36.8537	20.2264	23.6872	24.0252	32.8804
489.35	28.3832	24.337	25.7521	35.293	24.0665	24.9349	29.8858	36.3487	31.3628	33.1156	32.823	38.9517	36.5352	39.1621	42.685	44.5688	21.7347	25.4577	30.92	36.9512	20.2323	23.677	23.9899	32.8316
489.8	28.2985	24.3396	25.6868	35.249	24.09	24.9038	29.7994	36.3612	31.336	33.1041	32.8182	38.8178	36.4339	39.1076	42.5836	44.5373	21.8856	25.5505	30.9401	36.9684	20.2118	23.6804	23.9933	32.7953
490.25	28.2073	24.3425	25.6157	35.2175	24.1072	24.8665	29.7576	36.3239	31.2815	33.1911	32.7952	38.6983	36.3057	39.0301	42.4985	44.4187	22.0274	25.5734	31.0548	36.9656	20.291	23.7155	24.0111	32.8249
490.7	28.1614	24.3359	25.584	35.2012	24.1056	24.8239	29.7115	36.256	31.2547	33.3068	32.6642	38.6935	36.3057	38.9632	42.423	44.2848	22.0145	25.6063	31.2279	36.9407	20.3377	23.7736	24.0157	32.8182
491.15	28.1139	24.3276	25.5135	35.1687	24.048	24.8344	29.6638	36.1671	31.2279	33.3365	32.4663	38.7318	36.3057	38.9747	42.4143	44.1548	21.9948	25.4386	31.3188	36.8546	20.3435	23.8172	24.017	32.8278
491.6	28.0738	24.3155	25.453	35.1285	23.9853	24.831	29.6373	36.0877	31.1122	33.3661	32.2664	38.7958	36.3172	38.8972	42.4421	44.0362	22.0039	25.3651	31.1906	36.9665	20.3674	23.808	23.9729	32.8019
492.05	28.0462	24.2857	25.4099	35.0817	23.9145	24.8141	29.6129	36.0361	30.9831	33.2772	32.0895	38.8513	36.3908	38.8771	42.4392	44.0907	21.9795	25.3062	30.8875	37.1291	20.2905	23.7701	23.9337	32.7312
492.5	28.0278	24.2628	25.3921	35.0329	23.8775	24.7906	29.5783	36.0179	30.8186	33.1605	32.1106	38.8475	36.4071	38.8628	42.4268	44.1815	21.995	25.2738	30.6245	37.2237	20.2409	23.7754	23.8775	32.6518
492.95	28.0069	24.2249	25.4115	34.9861	23.8677	24.7241	29.5547	36.0341	30.6752	33.0907	32.1985	38.8236	36.4023	38.8274	42.3493	44.2533	22.0077	25.3037	30.4897	37.2448	20.218	23.7763	23.8287	32.5466
493.4	28.0339	24.1924	25.4557	34.9363	23.8612	24.68	29.5224	36.0485	30.7393	33.02	32.3181	38.7882	36.3296	38.8542	42.2546	44.2972	22.0174	25.2987	30.6743	37.0133	20.1633	23.8348	23.8508	32.4759
493.85	28.0385	24.1842	25.4832	34.8876	23.8754	24.6441	29.4718	36.1116	30.8177	32.9607	32.429	38.7566	36.213	38.8513	42.1877	44.2475	22.0587	25.3179	30.9688	36.7619	20.2082	23.8702	23.8652	32.3477
494.3	28.0278	24.1466	25.5123	34.7967	23.8389	24.6144	29.4458	36.1623	30.92	32.9091	32.4319	38.7289	36.147	38.8054	42.1284	44.1844	22.0791	25.3095	31.1151	36.5926	20.2533	23.7858	23.8895	32.2683
494.75	28.013	24.1094	25.5197	34.7384	23.7968	24.607	29.4179	36.147	30.9803	32.8937	32.4108	38.7165	36.0619	38.7557	42.0883	44.0859	22.1102	25.3443	31.074	36.5849	20.3557	23.7122	23.8852	32.2052
495.2	27.9808	24.0476	25.4762	34.6906	23.7488	24.606	29.3954	36.1317	30.9401	32.8928	32.3525	38.7002	36.0322	38.6935	42.028	43.9903	22.1068	25.3613	30.9057	36.6758	20.4488	23.6422	23.8056	32.1565
495.65	27.9884	24.0269	25.4395	34.6437	23.7195	24.6366	29.3978	35.9959	30.8856	32.9148	32.2789	38.6591	35.9586	38.6677	41.9735	43.8985	22.0887	25.3781	30.7402	36.7485	20.4438	23.6059	23.7835	32.2282
496.1	27.9955	24.0312	25.3798	34.6724	23.7428	24.6759	29.3573	35.8448	30.8167	32.9406	32.2244	38.618	35.8448	38.6438	41.9152	43.8029	22.0527	25.3882	30.723	36.7724	20.4598	23.6245	23.7566	32.2617
496.55	28.0046	24.0614	25.3389	34.6619	23.7912	24.6771	29.3005	35.7291	30.7861	32.9129	32.1785	38.5424	35.7654	38.5902	41.8597	43.7761	21.9811	25.389	30.8502	36.7666	20.3396	23.6231	23.7694	32.3238
497	27.9781	24.1333	25.3348	34.6447	23.8694	24.6494	29.2493	35.6201	30.746	32.8632	32.1765	38.4697	35.7224	38.4764	41.8396	43.7837	21.9483	25.4069	30.9755	36.8125	20.268	23.5845	23.8165	32.3248
497.45	27.9176	24.1481	25.3545	34.6275	23.8745	24.5711	29.2083	35.5885	30.7221	32.8278	32.2062	38.4181	35.7855	38.2909	41.7937	43.7847	21.9534	25.4245	31.0921	36.8183	20.2331	23.5257	23.765	32.2387
497.9	27.8673	24.1682	25.3879	34.5691	23.8557	24.4634	29.1806	35.5617	30.7249	32.8048	32.2215	38.4085	35.8247	38.1781	41.7536	43.7885	22.0785	25.4067	31.161	36.8957	20.1768	23.4454	23.732	32.1851
498.35	27.8321	24.1625	25.3888	34.5414	23.8074	24.4195	29.1613	35.5579	30.7163	32.7953	32.2196	38.3894	35.8582	38.1743	41.7019	43.7397	22.2674	25.4255	31.1734	36.9082	20.1906	23.3979	23.6766	32.0886
498.8	27.8326	24.1226	25.3528	34.5299	23.7176	24.3847	29.1464	35.5426	30.7211	32.756	32.1699	38.3187	35.8639	38.2096	41.6446	43.6747	22.4078	25.4215	31.0864	36.8049	20.1952	23.4073	23.6166	32.0379
499.25	27.8472	24.1191	25.2739	34.5223	23.6842	24.3855	29.1131	35.49	30.7335	32.6528	32.1163	38.2192	35.8228	38.3254	41.5948	43.6164	22.4965	25.5144	30.9085	36.7159	20.1993	23.4328	23.5844	32.0159
499.7	27.8505	24.0933	25.203	34.5251	23.6335	24.4161	29.1024	35.4594	30.6751	32.5265	32.0484	38.0528	35.8486	38.3913	41.5155	43.5131	22.3868	25.6972	30.7756	36.5352	20.1926	23.4972	23.554	31.969
500.15	27.8345	24.0532	25.133	34.506	23.568	24.3924	29.0901	35.3973	30.5191	32.4022	31.9547	37.8998	35.8993	38.3598	41.3366	43.4165	22.2062	25.7741	30.6523	36.3994	20.1534	23.569	23.5336	31.9556
500.6	27.8063	24.0062	25.0826	34.4716	23.526	24.3753	29.0374	35.3475	30.3488	32.3774	31.8332	37.8482	35.8199	38.3407	41.1253	43.3228	22.0555	25.845	30.7651	36.4463	20.116	23.5546	23.4786	31.9652
501.05	27.7985	23.9095	25.0808	34.4362	23.4868	24.3526	29.0024	35.3055	30.1565	32.4127	31.6583	37.8644	35.6975	38.2775	40.9207	43.2253	21.9396	25.7187	31.0099	36.4893	20.1045	23.5143	23.4352	31.9872
501.5	27.8193	23.8345	25.0549	34.3961	23.4828	24.3272	28.9558	35.2663	30.0562	32.4338	31.5033	37.9046	35.5072	38.2402	40.8107	43.1899	21.9261	25.5308	31.2384	36.6213	20.0415	23.469	23.3854	31.9824
501.95	27.8496	23.8007	24.985	34.3664	23.5022	24.3186	28.909	35.2318	30.1481	32.4759	31.4479	37.9639	35.2873	38.2594	40.9187	43.1841	21.9645	25.3943	31.4679	36.7398	20.0548	23.3752	23.3151	31.9451
502.4	27.9003	23.7425	24.9176	34.3262	23.5201	24.3048	28.8763	35.1764	30.2209	32.4663	31.488	37.9916	35.3093	38.2594	41.0306	43.1373	21.9925	25.3151	31.4373	36.7006	20.0488	23.351	23.278	31.8983
502.85	27.919	23.7321	24.8143	34.2612	23.5317	24.3063	28.772	35.1467	30.33	32.4673	31.5559	37.9773	35.338	38.2938	41.1597	43.099	21.9869	25.3068	31.3694	36.7265	20.0532	23.3552	23.2494	31.8352
503.3	27.9187	23.6969	24.7249	34.1771	23.5176	24.2944	28.6604	35.0779	30.3835	32.494	31.6334	37.9859	35.4642	38.3043	41.2114	43.0378	21.9789	25.3111	31.2164	36.6815	20.1538	23.325	23.2232	31.8074
503.75	27.9115	23.6411	24.7788	34.1149	23.4653	24.3563	28.5566	35.0186	30.3405	32.4768	31.6324	38.004	35.6602	38.2938	41.1435	42.947	21.9577	25.3384	31.0692	36.6031	20.1907	23.3252	23.2042	31.7988
504.2	27.8514	23.6957	24.8319	34.0661	23.4079	24.4395	28.5027	34.9918	30.3482	32.4137	31.5808	37.9945	35.7377	38.2995	41.0976	42.903	21.9268	25.2878	31.0443	36.5295	20.2318	23.2877	23.1684	31.7453
504.65	27.8057	23.7277	24.9146	34.0375	23.3413	24.4745	28.5642	34.9784	30.308	32.342	31.5712	38.005	35.8553	38.2259	41.0297	42.8561	21.9189	25.272	30.9477	36.4329	20.2054	23.2454	23.1329	31.686
505.1	27.7508	23.8023	25.0175	34.0499	23.2958	24.5233	28.631	34.9669	30.2908	32.2664	31.5483	38.0002	35.8515	38.0624	40.9819	42.8198	21.8983	25.2738	30.9554	36.3048	20.1691	23.2481	23.1058	31.6028
505.55	27.7152	23.8828	25.0565	34.0135	23.3302	24.4343	28.6971	34.9574	30.2717	32.254	31.532	37.9773	35.7396	37.8549	40.9742	42.8064	21.8786	25.2741	30.9458	36.2436	20.1404	23.2436	23.1049	31.5397
506	27.7142	23.8929	25.1045	33.9743	23.3589	24.312	28.7144	34.9191	30.2286	32.3009	31.5378	37.9945	35.7109	37.6244	40.957	42.7491	21.8798	25.2979	30.8904	36.235	20.1222	23.2476	23.1191	31.4488
506.45	27.6999	23.8936	25.1108	33.9514	23.3847	24.2199	28.6677	34.8503	30.2166	32.3171	31.489	37.983	35.7377	37.4857	40.935	42.6926	21.8678	25.3218	30.8942	36.2111	20.1557	23.2426	23.0928	31.357
506.9	27.7391	23.8615	25.0889	33.9036	23.3954	24.1107	28.6218	34.8235	30.1959	32.342	31.4393	37.9515	35.8572	37.525	40.9178	42.641	21.9245	25.3206	30.8167	36.256	20.1577	23.2231	23.0419	31.2659
507.35	27.7601	23.8199	25.0517	33.8864	23.3577	24.0485	28.5571	34.7929	30.1973	32.3248	31.4211	37.9342	35.9299	37.6206	40.8738	42.5903	21.9696	25.3032	30.7479	36.2665	20.1842	23.2301	22.9727	31.1403
507.8	27.779	23.79	25.0135	33.8644	23.3284	24.0284	28.4973	34.7757	30.1918	32.3219	31.3819	37.875	35.8132	37.7344	40.8461	42.5836	22.0107	25.2985	30.7201	36.2675	20.145	23.2209	22.9205	31.119
508.25	27.8086	23.7797	24.9863	33.8338	23.3042	24.0163	28.4577	34.7805	30.1536	32.363	31.3637	37.8042	35.5225	37.8109	40.8489	42.575	22.1025	25.3188	30.6303	36.2359	20.0942	23.2077	22.9101	31.1149
508.7	27.7678	23.7645	24.9348	33.7926	23.2798	24.0065	28.4102	34.7613	30.1016	32.3429	31.3341	37.7162	35.1697	37.7946	40.8566	42.5521	22.0953	25.3438	30.5968	36.3143	20.0424	23.18	22.9098	31.1525
509.15	27.7624	23.7543	24.89	33.7525	23.259	24.0159	28.3728	34.7403	30.0134	32.2244	31.3207	37.6301	34.9985	37.7822	40.8652	42.5205	22.0942	25.4806	30.5595	36.4233	19.9687	23.1083	22.9066	31.1996
509.6	27.7612	23.7394	24.8417	33.7324	23.2479	23.979	28.3599	34.703	29.9578	32.035	31.3255	37.5623	34.943	37.7363	40.8231	42.4536	22.0888	25.6297	30.5624	36.5276	20.0134	23.0728	22.8951	31.1682
510.05	27.7554	23.7263	24.7894	33.7391	23.2433	23.9575	28.3405	34.5624	29.9791	31.8266	31.3656	37.545	35.0415	37.7076	40.65	42.4277	22.0368	25.7044	30.6714	36.7255	20.0388	23.0571	22.8942	31.1549
510.5	27.7672	23.7317	24.799	33.7659	23.2652	23.9696	28.338	34.4247	30.0363	31.7386	31.4479	37.6034	35.1677	37.7363	40.4454	42.3943	22.0195	25.769	30.6857	36.6882	20.074	23.0537	22.9073	31.1365
510.95	27.7222	23.781	24.7921	33.7764	23.298	23.9734	28.312	34.2899	30.114	31.8619	31.4536	37.6302	35.2156	37.7172	40.1929	42.3618	22.0287	25.6279	30.7001	36.5935	20.133	23.1099	22.9188	31.0851
511.4	27.6934	23.8231	24.7906	33.7687	23.3624	23.9858	28.2209	34.1828	30.1534	32.0207	31.4316	37.6521	35.25	37.7325	40.0113	42.3828	22.0503	25.4893	30.6226	36.4931	20.1152	23.181	22.9249	31.0847
511.85	27.6683	23.8513	24.8266	33.7161	23.4149	23.9409	28.128	34.2603	30.1321	32.1689	31.3494	37.6569	35.2595	37.7153	40.0476	42.3245	22.0697	25.359	30.5451	36.3095	20.1308	23.2578	22.902	31.0339
512.3	27.633	23.8522	24.8325	33.6588	23.5331	23.8498	28.0256	34.3301	30.0797	32.2597	31.2308	37.59	35.2691	37.6321	40.0887	42.2862	22.103	25.256	30.6188	36.2569	20.1418	23.2966	22.8438	30.96
512.75	27.6184	23.7839	24.8227	33.6119	23.6718	23.7784	27.9998	34.3999	30.0226	32.2244	31.16	37.5288	35.2423	37.6024	40.2025	42.2413	22.08	25.2341	30.6943	36.2369	20.1482	23.2665	22.7856	30.957
513.2	27.5485	23.7216	24.8001	33.5067	23.7203	23.7428	28.0471	34.462	29.9564	32.1928	31.1036	37.4724	35.293	37.5307	40.2809	42.1676	22.0407	25.1823	30.8081	36.2302	20.1622	23.2029	22.7355	30.9163
513.65	27.562	23.6891	24.7521	33.4254	23.7756	23.7426	28.0759	34.4438	29.8739	32.1613	31.0635	37.4083	35.3236	37.523	40.2446	42.1332	21.9953	25.1872	30.8167	36.2397	20.1434	23.123	22.7037	30.9467
514.1	27.5961	23.6802	24.7015	33.326	23.6456	23.7705	28.1231	34.4295	29.8223	32.0981	31.0229	37.392	35.2796	37.5087	40.2245	42.0796	21.9298	25.1615	30.7297	36.2464	20.1063	23.0675	22.7115	30.9832
514.55	27.6471	23.6851	24.6814	33.2256	23.4629	23.7821	28.1268	34.4047	29.7713	32.0647	30.9709	37.3758	35.3686	37.481	40.1796	42.0204	21.9172	25.1595	30.6943	36.2598	20.1703	23.0525	22.6784	30.9933
515	27.7529	23.6969	24.6789	33.2495	23.3447	23.7564	28.1291	34.376	29.7636	32.0149	30.9208	37.3681	35.38	37.5642	40.1298	41.9333	21.9325	25.1495	30.6523	36.2483	20.2467	23.0383	22.6486	31.0063
515.45	27.6865	23.6793	24.6601	33.2523	23.209	23.7233	28.1581	34.3109	29.7839	31.9585	30.8936	37.3347	35.4317	37.5508	40.1021	41.8549	21.9758	25.1049	30.6647	36.2741	20.3485	23.0482	22.6142	30.9451
515.9	27.6295	23.6623	24.6333	33.2782	23.1689	23.6872	28.1547	34.2593	29.7659	31.9662	30.8914	37.2888	35.6545	37.5709	40.0811	41.787	22	25.0933	30.7986	36.2799	20.4714	23.0731	22.5568	30.8898
516.35	27.5487	23.667	24.6078	33.3145	23.1506	23.6448	28.1303	34.2306	29.7214	31.9719	30.8914	37.2687	35.6947	37.5642	40.0505	41.7335	21.9706	25.0533	30.7967	36.2483	20.3416	23.04	22.5968	30.8116
516.8	27.4383	23.6549	24.5472	33.3002	23.096	23.6049	28.0783	34.2086	29.6108	32.0101	30.8827	37.24	35.7501	37.4609	40.0304	41.7316	21.9259	25.0484	30.7986	36.2646	20.232	22.9945	22.6231	30.745
517.25	27.4276	23.6397	24.5858	33.2906	23.0482	23.567	28.0134	34.2067	29.5411	32.0455	30.859	37.2562	35.8591	37.392	39.9969	41.7038	21.8626	25.0551	30.7861	36.2311	20.1051	22.9139	22.6357	30.6976
517.7	27.3947	23.6172	24.6567	33.2667	22.986	23.5146	27.9627	34.1885	29.5081	32.0503	30.8232	37.284	35.8783	37.3194	39.9376	41.6723	21.9598	25.0098	30.6589	36.2072	19.9842	22.8352	22.6555	30.6309
518.15	27.4357	23.5779	24.715	33.2351	22.9265	23.4884	27.931	34.1321	29.5654	32.0283	30.7846	37.2754	35.9863	37.2562	39.8831	41.6436	22.1206	25.0644	30.6398	36.2244	20.0232	22.8315	22.6448	30.6167
518.6	27.4951	23.542	24.7997	33.2074	22.9254	23.4951	27.9128	34.0394	29.7068	31.9776	30.7157	37.2524	36.103	37.2218	39.8583	41.5738	22.2284	25.1159	30.7048	36.2933	20.0165	22.832	22.6168	30.6125
519.05	27.5234	23.5209	24.7524	33.1797	22.9521	23.5199	27.8951	33.9523	29.7763	31.8734	30.6721	37.2505	35.9557	37.2333	39.8363	41.5327	22.334	25.2277	30.6589	36.3669	20.0159	22.8334	22.6029	30.6173
519.5	27.5567	23.5475	24.6828	33.1605	22.9599	23.547	27.8985	33.8577	29.8171	31.7309	30.6252	37.2199	35.7845	37.2343	39.8716	41.481	22.1933	25.4157	30.5738	36.3918	20.021	22.8449	22.5823	30.6393
519.95	27.4849	23.5709	24.6166	33.1261	22.9754	23.549	27.9082	33.7993	29.7605	31.6114	30.5838	37.2649	35.621	37.2582	39.8362	41.4514	22.0142	25.449	30.5298	36.2675	20.0055	22.8318	22.5333	30.5774
520.4	27.3959	23.6097	24.5424	33.0668	22.9285	23.5123	27.9021	33.806	29.6459	31.5272	30.641	37.328	35.3858	37.2868	39.7349	41.4284	21.8916	25.473	30.3587	35.949	20.0099	22.8669	22.5166	30.5416
520.85	27.3324	23.6393	24.5174	33.0209	22.8669	23.4659	27.9148	33.8194	29.5474	31.5894	30.6606	37.2811	35.3762	37.261	39.6278	41.4906	21.7809	25.3651	30.4562	35.6736	19.9854	22.9087	22.4988	30.5161
521.3	27.2931	23.5951	24.4819	32.9875	22.8836	23.4485	27.8978	33.8644	29.4555	31.6525	30.6799	37.2237	35.4499	37.2543	39.4528	41.5967	21.8023	25.2145	30.6226	35.4881	19.9384	22.9336	22.4791	30.4713
521.75	27.2997	23.5777	24.445	32.9913	22.8817	23.4369	27.859	33.8997	29.3809	31.7414	30.7185	37.0918	35.4929	37.2008	39.449	41.6417	21.8242	25.1432	30.7106	35.5952	19.9287	22.9675	22.4615	30.4759
522.2	27.2923	23.532	24.4161	33.0104	22.9012	23.4395	27.8215	33.8864	29.3252	31.8026	30.6773	36.9464	35.5971	37.1597	39.4977	41.7029	21.8281	25.0733	30.8234	35.8649	19.9276	22.9208	22.4051	30.4349
522.65	27.2476	23.4839	24.3662	33.0238	22.9288	23.4308	27.7409	33.8758	29.29	31.795	30.6372	36.8804	35.622	37.1644	39.5704	41.5881	21.808	25.0675	30.8158	36.0724	20.0145	22.9663	22.3622	30.3766
523.1	27.1941	23.4409	24.3308	33.0075	22.9312	23.3853	27.6588	33.8519	29.2501	31.8141	30.6038	36.8833	35.5263	37.3002	39.6746	41.4189	21.7786	25.0643	30.7804	36.2101	20.1096	23.0218	22.3796	30.3485
523.55	27.1455	23.3883	24.3456	32.9549	22.9459	23.3488	27.5788	33.8223	29.2542	31.7892	30.5378	36.8871	35.3839	37.4886	39.6727	41.286	21.7689	25.0921	30.7613	36.1651	20.1751	23.0768	22.4009	30.3303
524	27.1363	23.3641	24.3629	32.8794	22.9636	23.3102	27.5131	33.8089	29.2744	31.7481	30.4828	36.9082	35.3131	37.5862	39.6574	41.1597	21.7861	25.1193	30.7307	36.0198	20.2122	23.187	22.45	30.3332
524.45	27.2044	23.3579	24.4131	32.8125	22.9609	23.2019	27.4871	33.7754	29.2697	31.7166	30.4502	36.9091	35.2988	37.655	39.5981	41.1052	21.8369	25.1468	30.657	35.9155	20.1683	23.1125	22.4719	30.352
524.9	27.242	23.3964	24.4634	32.7685	22.9413	23.1071	27.4747	33.719	29.2679	31.6793	30.4082	36.8231	35.3475	37.4456	39.5417	41.089	21.896	25.1945	30.6331	35.839	20.1025	23.0232	22.4063	30.362
525.35	27.255	23.4243	24.4286	32.7331	22.9248	23.0022	27.4939	33.6808	29.2017	31.6678	30.376	36.7781	35.5187	37.2113	39.5054	41.0746	21.9455	25.1996	30.6169	35.8276	20.0217	22.9178	22.3906	30.3533
525.8	27.2503	23.4459	24.4682	32.7226	22.9058	22.8982	27.5015	33.6224	29.156	31.6898	30.3605	36.7255	35.5665	37.0736	39.4604	41.0373	21.9676	25.2211	30.6666	35.8993	19.9746	22.8187	22.3798	30.3108
526.25	27.2032	23.4432	24.5204	32.6958	22.8942	22.9367	27.5009	33.5641	29.1389	31.664	30.3466	36.6882	35.6287	36.9436	39.4585	40.9952	21.9781	25.237	30.745	35.9653	19.9562	22.8085	22.3915	30.2706
526.7	27.195	23.4126	24.5623	32.6709	22.8505	22.9835	27.4905	33.5067	29.13	31.6592	30.3422	36.6978	35.6698	36.9646	39.4729	40.9417	22.0045	25.226	30.7115	36.0379	19.9785	22.7955	22.4465	30.1795
527.15	27.2146	23.3863	24.6277	32.6451	22.8017	23.0243	27.4805	33.3413	29.17	31.6229	30.3321	36.6672	35.6621	36.9933	39.4834	40.8786	22.0402	25.2153	30.6188	36.0035	19.983	22.7893	22.4177	30.1124
527.6	27.242	23.3502	24.5374	32.6011	22.7631	23.0866	27.4774	33.2055	29.1268	31.6057	30.3293	36.6299	35.6755	36.9636	39.4872	40.8011	22.1819	25.1366	30.5547	35.949	20.0741	22.7599	22.3813	30.075
528.05	27.2568	23.3393	24.4121	32.561	22.7183	23.0825	27.4516	33.0707	29.0555	31.6334	30.2924	36.583	35.5942	36.9197	39.4566	40.7552	22.3188	25.1398	30.4715	35.9089	20.1585	22.7431	22.345	30.009
528.5	27.2408	23.3276	24.3027	32.4979	22.7211	23.0711	27.4507	32.9922	28.9804	31.6764	30.2055	36.5266	35.5464	36.8527	39.4145	40.7017	22.3828	25.1283	30.4734	35.8601	20.2317	22.7273	22.2846	30.016
528.95	27.1447	23.3117	24.2296	32.4577	22.7355	23.0807	27.3986	33.0907	28.9003	31.6735	30.0855	36.518	35.4919	36.7753	39.3476	40.6673	22.419	25.1161	30.593	35.9213	20.3538	22.7229	22.2566	29.9855
529.4	27.0313	23.3175	24.2188	32.4443	22.7366	23.0601	27.3281	33.1739	28.8549	31.5942	29.9263	36.5199	35.4097	36.7246	39.3285	40.6529	22.2594	25.1967	30.5614	35.927	20.307	22.7319	22.2276	29.9201
529.85	26.9334	23.3042	24.2078	32.45	22.7613	23.0391	27.2817	33.2772	28.8282	31.5005	29.7925	36.4855	35.3801	36.7274	39.3352	40.6204	22.1057	25.131	30.6857	35.8018	20.2485	22.761	22.1487	29.8827
530.3	26.8342	23.3097	24.1768	32.4845	22.7737	23.0304	27.2099	33.3403	28.8037	31.3503	29.7474	36.366	35.3093	36.7418	39.2998	40.586	21.9725	25.1011	30.8062	35.6574	20.1682	22.7885	22.089	29.8183
530.75	26.876	23.3208	24.1268	32.4988	22.7847	23.0149	27.1658	33.3384	28.7599	31.3417	29.8076	36.1852	35.2567	36.7838	39.296	40.4961	21.835	25.1014	30.8014	35.4728	20.0472	22.7703	22.0565	29.7934
531.2	26.9148	23.3094	24.1051	32.5074	22.7902	22.99	27.1466	33.3336	28.7296	31.3867	29.8842	36.0073	35.3198	36.8584	39.2501	40.4081	21.7906	25.0625	30.9353	35.3829	19.9893	22.7364	22.0247	29.8204
531.65	26.9179	23.2953	24.1022	32.494	22.7798	22.911	27.1184	33.325	28.6965	31.4526	29.9674	35.9155	35.3762	36.8269	39.1869	40.2981	21.7412	25.1206	30.8158	35.5464	19.9751	22.6824	22.0344	29.8378
532.1	26.9519	23.2765	24.1445	32.4605	22.7639	22.8015	27.1123	33.3107	28.6769	31.5473	29.9914	36.0093	35.4068	36.7867	39.163	40.2121	21.7136	25.1648	30.7268	35.7281	19.9921	22.6362	22.0819	29.8539
532.55	26.9166	23.2609	24.1768	32.4366	22.7243	22.6816	27.1172	33.2648	28.6962	31.577	29.9537	36.1326	35.4642	36.7131	39.0961	40.2283	21.7248	25.1481	30.7278	35.905	20.0437	22.6488	22.0705	29.844
533	26.9093	23.2346	24.1996	32.407	22.6946	22.6234	27.1021	33.2284	28.7126	31.5923	29.9409	36.2445	35.4575	36.6165	39.0244	40.2551	21.717	25.1074	30.6532	36.014	20.0883	22.6661	22.0682	29.8585
533.45	26.9814	23.225	24.2246	32.3793	22.6736	22.6709	27.089	33.1739	28.7349	31.5712	29.9199	36.3296	35.4661	36.6175	38.9517	40.3087	21.709	25.0369	30.6857	35.9662	20.1066	22.6713	22.0612	29.8675
533.9	27.0376	23.1972	24.1902	32.3601	22.643	22.7385	27.0549	33.1376	28.71	31.5263	29.9154	36.321	35.5302	36.6222	38.8637	40.3517	21.6982	24.9714	30.6714	35.9404	20.0468	22.6763	21.9488	29.8803
534.35	27.119	23.1552	24.2057	32.3362	22.6435	22.8244	27.0161	33.1319	28.6467	31.4756	29.9121	36.3239	35.4221	36.6318	38.8245	40.2962	21.664	24.9752	30.636	35.928	19.9547	22.6611	21.8749	29.8985
534.8	27.1964	23.1161	24.2144	32.3123	22.6574	22.8641	27.0121	33.1338	28.597	31.4192	29.8564	36.3306	35.3064	36.6184	38.7872	40.2321	21.648	25.0312	30.6571	35.9596	19.8869	22.6469	21.7848	29.8328
535.25	27.2081	23.0687	24.2131	32.2999	22.7606	22.8616	26.983	33.0907	28.5617	31.3618	29.8137	36.3287	35.183	36.5926	38.7863	40.1623	21.6552	25.107	30.7116	36.0102	19.8036	22.6412	21.7295	29.7708
535.7	27.2209	23.0336	24.2405	32.277	22.8916	22.8838	26.9542	32.9521	28.5861	31.3589	29.7808	36.3373	35.0865	36.5735	38.7863	40.0495	21.6888	25.1634	30.7737	36.0179	19.8664	22.5897	21.7781	29.694
536.15	27.179	23.0123	24.1933	32.2368	22.9979	22.8936	26.9156	32.78	28.6285	31.3656	29.7558	36.322	35.1419	36.5314	38.7834	39.995	21.693	25.2251	30.8406	36.0341	19.9578	22.5125	21.8501	29.652
536.6	27.118	22.9485	24.1322	32.1737	23.0823	22.9066	26.8491	32.5897	28.6363	31.4048	29.7851	36.3124	35.1582	36.5304	38.8016	39.9376	21.7768	25.2331	30.8378	36.0294	20.063	22.4328	21.9123	29.6293
537.05	27.0787	22.898	24.0675	32.0867	22.9594	22.9033	26.8514	32.5112	28.5972	31.4469	29.7828	36.2904	35.2366	36.4979	38.7863	39.8889	21.8209	25.1958	30.7488	36.0255	20.1799	22.3497	21.926	29.6141
537.5	27.0442	22.8581	24.0126	32.0073	22.8024	22.8727	26.8563	32.5839	28.4881	31.4842	29.7718	36.2598	35.2825	36.4654	38.7748	39.9223	21.88	25.1278	30.6714	36.0141	20.1751	22.3822	21.9014	29.627
537.95	27.064	22.8146	23.9902	31.9633	22.6438	22.8249	26.8688	32.6824	28.3542	31.4813	29.7349	36.2713	35.447	36.4989	38.7279	39.9462	22.0112	24.9166	30.6848	35.9548	20.1665	22.4203	21.8326	29.5702
538.4	27.0808	22.9047	23.9984	31.9384	22.499	22.8029	26.8779	32.801	28.265	31.5052	29.7556	36.2694	35.73	36.4912	38.6859	39.974	22.0182	24.7339	30.7641	35.9576	20.1437	22.466	21.8019	29.5747
538.85	27.0778	22.9663	24.0237	31.948	22.4817	22.8201	26.858	32.8603	28.2278	31.5884	29.8206	36.2675	35.819	36.497	38.6553	39.9835	22.0641	24.5691	30.901	35.9739	20.1215	22.5002	21.7909	29.5741
539.3	27.0735	23.0289	24.0373	31.9662	22.485	22.8204	26.8579	32.8641	28.2903	31.6085	29.871	36.2608	35.9108	36.5429	38.6887	39.9319	22.0341	24.5261	31.122	36.0695	20.1464	22.4576	21.7776	29.5337
539.75	27.0104	23.0928	24.0314	31.9537	22.5013	22.8473	26.8543	32.8507	28.3902	31.6487	29.9296	36.2311	35.7224	36.5304	38.7605	39.8927	21.9438	24.6558	31.1794	36.1977	20.143	22.4411	21.7759	29.5395
540.2	27.002	23.0769	23.9906	31.949	22.5201	22.8244	26.8555	32.8182	28.4611	31.5817	29.8331	36.233	35.4604	36.4931	38.7844	39.8802	21.8964	24.7732	31.2656	36.212	20.0993	22.4026	21.7659	29.4774
540.65	27.0346	23.0845	23.9371	31.9375	22.5087	22.7541	26.8294	32.7895	28.4952	31.4622	29.7033	36.2244	35.3571	36.4788	38.7978	39.8477	21.8229	24.9402	31.32	36.147	20.0403	22.3738	21.7668	29.4414
541.1	27.0308	23.0581	23.8737	31.9164	22.4929	22.7063	26.7943	32.7618	28.4702	31.3781	29.5971	36.2158	35.2108	36.3908	38.7098	39.7301	21.7679	25.0112	31.1526	36.0179	19.9547	22.3665	21.7754	29.438
541.55	27.0794	23.0472	23.8556	31.9164	22.4836	22.6662	26.7744	32.7551	28.4285	31.3207	29.5208	36.1489	35.2414	36.3296	38.6122	39.5513	21.785	25.0341	31.0109	35.9012	19.9061	22.3694	21.7775	29.4125
542	27.0439	23.0457	23.8709	31.9002	22.4664	22.6473	26.7616	32.7627	28.3956	31.3178	29.5393	36.0456	35.2873	36.3449	38.5309	39.317	21.8188	25.0762	30.701	35.797	19.9118	22.4208	21.7407	29.4284
542.45	26.9575	23.0384	23.8823	31.8705	22.4523	22.6374	26.7515	32.7627	28.3572	31.3159	29.543	35.9519	35.3934	36.3382	38.443	39.1745	21.8522	25.063	30.4314	35.8362	19.9507	22.4759	21.6608	29.3922
542.9	26.9307	23.066	23.9625	31.8696	22.4373	22.6355	26.7436	32.7599	28.2294	31.313	29.5432	35.8543	35.5923	36.3201	38.3779	39.2462	21.9083	25.0958	30.3042	35.8878	20.0294	22.5163	21.5731	29.3575
543.35	26.9032	23.0386	24.0045	31.86	22.4048	22.6107	26.7101	32.7513	28.097	31.2891	29.5146	35.8582	35.687	36.3	38.3024	39.3476	21.8791	25.1263	30.1607	35.9471	20.0777	22.5368	21.5086	29.3436
543.8	26.9104	23.0161	24.0254	31.8686	22.3665	22.6089	26.6959	32.713	27.9698	31.2767	29.463	35.863	35.7759	36.255	38.2642	39.4777	21.8157	25.1355	30.2009	36.0676	20.0706	22.5071	21.4857	29.2809
544.25	26.9301	22.9909	24.0474	31.8763	22.3718	22.6136	26.7026	32.6939	27.8802	31.2662	29.4555	35.8907	35.7195	36.2082	38.2622	39.5255	21.7505	25.1924	30.2544	36.1087	20.0514	22.5657	21.5386	29.2557
544.7	26.9054	22.9403	23.9351	31.838	22.3915	22.6213	26.6848	32.6411	27.9416	31.2327	29.4312	35.9509	35.5675	36.2292	38.2785	39.4624	21.7082	25.2177	30.3051	36.1518	20.0005	22.6303	21.5915	29.1839
545.15	26.838	22.8933	23.8396	31.7787	22.4108	22.6314	26.6859	32.5797	28.0138	31.2031	29.4206	35.9538	35.4441	36.2397	38.2928	39.4212	21.7191	25.1983	30.4725	36.1345	19.9492	22.6862	21.6385	29.1228
545.6	26.7745	22.8193	23.7584	31.7099	22.4588	22.6425	26.6402	32.5642	28.1079	31.1763	29.4141	35.9739	35.3198	36.2302	38.2785	39.3648	21.7818	25.1892	30.5566	36.0724	19.9582	22.7793	21.6637	29.0968
546.05	26.7249	22.7348	23.6889	31.643	22.4639	22.6758	26.5809	32.5401	28.2021	31.1466	29.4238	35.9528	35.2309	36.2416	38.2202	39.3189	21.863	25.1204	30.614	36.0026	19.9553	22.7251	21.6219	29.0728
546.5	26.696	22.6574	23.7261	31.5971	22.4793	22.6748	26.5426	32.5642	28.2693	31.1371	29.4439	35.8735	35.1764	36.2024	38.1704	39.2625	21.9622	25.0823	30.657	35.9471	19.9723	22.6447	21.6747	29.1137
546.95	26.7149	22.6773	23.7558	31.5932	22.5135	22.6843	26.4976	32.6026	28.3277	31.1103	29.4498	35.8276	35.1878	36.2024	38.136	39.1793	22.0337	25.0673	30.6943	35.949	20.008	22.578	21.7347	29.0984
547.4	26.7444	22.7433	23.7732	31.5416	22.4974	22.656	26.4621	32.6038	28.3241	31.0749	29.4302	35.7932	35.184	36.2254	38.114	39.1152	22.1233	24.9668	30.7574	36.0007	19.986	22.4805	21.8033	29.0845
547.85	26.7848	22.8367	23.78	31.5033	22.4861	22.5995	26.4327	32.5925	28.3009	31.0529	29.3385	35.7759	35.2137	36.2359	38.1169	39.098	22.2083	24.8333	30.767	36.0447	19.9872	22.435	21.8825	29.0185
548.3	26.8118	22.9432	23.7328	31.4651	22.4462	22.5573	26.4012	32.5428	28.2705	31.1323	29.2381	35.796	35.2997	36.3009	38.136	39.0846	22.1778	24.6171	30.6408	36.1212	19.9877	22.4049	21.7935	28.9251
548.75	26.7986	22.9885	23.6864	31.401	22.377	22.4977	26.3595	32.4577	28.2522	31.2557	29.1489	35.7654	35.3561	36.3105	38.1504	39.0856	22.1533	24.4102	30.3874	36.1948	20.0214	22.3565	21.6795	28.9192
549.2	26.7299	22.9844	23.6686	31.4392	22.3382	22.4719	26.3402	32.386	28.2811	31.3582	29.1171	35.7013	35.3638	36.2579	38.2393	39.0789	22.0699	24.385	30.1053	36.3947	20.0712	22.3378	21.5716	28.9051
549.65	26.6403	22.9901	23.6578	31.466	22.2925	22.4479	26.3287	32.3391	28.3037	31.4616	29.1253	35.6583	35.3906	36.1661	38.333	39.0148	21.9725	24.4897	29.9312	36.6031	20.1058	22.3154	21.4821	29.0392
550.1	26.5583	22.9927	23.6697	31.4976	22.2595	22.4518	26.3132	32.3075	28.2939	31.4006	29.1517	35.6153	35.3399	36.0284	38.3703	38.9727	21.9702	24.656	30.0651	36.7188	20.1078	22.3021	21.4451	29.1631
550.55	26.4953	22.9726	23.7041	31.5282	22.2622	22.4667	26.3171	32.3104	28.2605	31.2956	29.1773	35.6153	35.2806	35.9309	38.3923	38.9316	21.9865	24.8221	30.3004	36.7619	20.0649	22.3535	21.4206	29.2168
551	26.5316	22.9745	23.699	31.5081	22.2521	22.4408	26.2822	32.2913	28.1648	31.2132	29.1747	35.6306	35.3284	35.9261	38.2661	38.9297	22.0012	24.8912	30.5509	36.4836	20.0787	22.3998	21.4236	29.3111
551.45	26.5783	22.9218	23.6881	31.4852	22.2159	22.4174	26.1718	32.2626	27.9626	31.1155	29.1713	35.6478	35.3083	35.9605	38.1092	38.9632	22.0152	24.9063	30.6714	36.2417	20.0745	22.4716	21.4144	29.2021
551.9	26.6329	22.8057	23.6731	31.4479	22.15	22.3896	26.0577	32.2301	27.7668	31.0866	29.145	35.6717	35.3102	36.0284	37.9907	38.9737	21.9707	24.9123	30.6551	36.0102	20.0926	22.5229	21.4396	29.1292
552.35	26.6657	22.7359	23.6107	31.4201	22.0806	22.3602	25.9318	32.2674	27.6069	31.0692	29.1102	35.6784	35.3112	36.0944	37.8807	39.0263	21.8987	24.9299	30.5232	35.8687	20.1165	22.4774	21.4696	29.0831
552.8	26.637	22.6488	23.5621	31.4067	22.0674	22.3794	25.8746	32.3468	27.5236	31.0453	29.0668	35.6048	35.2624	36.1479	37.8252	39.01	21.822	24.928	30.4323	35.8735	20.0572	22.4923	21.4502	28.9803
553.25	26.6008	22.6032	23.5253	31.4	22.124	22.4015	25.9362	32.3898	27.6711	31.0185	29.0051	35.5024	35.2586	36.1957	37.7985	38.9833	21.7576	24.9294	30.482	35.8438	20.0064	22.4721	21.4339	29.0129
553.7	26.5446	22.663	23.4871	31.401	22.2048	22.3729	26.0047	32.4386	27.8172	30.9793	28.9752	35.3705	35.2624	36.2187	37.7745	38.9594	21.7336	24.9395	30.5117	35.8907	19.9861	22.5092	21.4077	28.9869
554.15	26.5026	22.6814	23.4598	31.402	22.2673	22.3484	26.0981	32.3353	27.9397	30.9678	28.9594	35.2299	35.2796	36.2397	37.7439	38.858	21.7248	24.9668	30.6685	35.8773	20.0252	22.5999	21.3956	28.9712
554.6	26.4683	22.7267	23.4343	31.3857	22.2684	22.2948	26.1418	32.2291	28.0646	30.9621	28.9549	35.2471	35.2873	36.2369	37.7478	38.7901	21.7617	25.0288	30.7574	35.9223	20.1303	22.5524	21.3862	28.949
555.05	26.4426	22.7568	23.4045	31.3637	22.249	22.2478	26.1283	32.1651	28.0571	30.9726	28.9792	35.2643	35.2758	36.2139	37.7621	38.7117	21.8116	25.0978	30.7307	35.9605	20.2466	22.5404	21.4096	28.8523
555.5	26.3414	22.7521	23.3907	31.34	22.2181	22.2358	26.122	32.1039	28.0719	30.9956	28.9528	35.3198	35.316	36.1843	37.7516	38.639	21.8592	25.1999	30.6264	35.9576	20.2958	22.4853	21.4594	28.8171
555.95	26.2632	22.764	23.4096	31.2407	22.1955	22.2349	26.0711	32.1029	28.0658	30.9994	28.9519	35.3915	35.337	36.1269	37.7487	38.5816	21.891	25.2589	30.4447	35.9921	20.2042	22.3968	21.4822	28.748
556.4	26.1844	22.749	23.4373	31.1357	22.1718	22.2313	26.0436	32.0608	28.0225	30.9917	28.9583	35.3848	35.36	36.0571	37.7267	38.5434	21.9493	25.3307	30.3166	35.9672	20.1106	22.357	21.5131	28.7431
556.85	26.096	22.7071	23.4606	31.0451	22.1581	22.2108	26.0337	31.9958	28.0016	30.9357	28.9605	35.3839	35.3839	36.016	37.6885	38.5214	21.9752	25.3402	30.3233	35.9777	20.0162	22.3086	21.4985	28.7209
557.3	26.1976	22.6639	23.4767	30.9579	22.176	22.193	26.021	31.9298	27.9417	30.8557	29.0191	35.3571	35.2318	35.9538	37.676	38.5185	22.1192	25.2453	30.3969	35.9978	19.9686	22.239	21.4397	28.6605
557.75	26.3098	22.6422	23.497	31.0084	22.1729	22.163	26.0241	31.8677	27.9241	30.7519	29.0042	35.3265	35.0874	35.9203	37.6598	38.574	22.2816	25.0235	30.5203	35.9758	20.0217	22.2031	21.3776	28.6458
558.2	26.412	22.6762	23.5146	31.0678	22.2065	22.163	25.9924	31.8409	27.8918	30.6528	28.9757	35.3198	34.9794	35.8687	37.6483	38.595	22.3327	24.7095	30.6073	36.0284	20.0177	22.1866	21.3284	28.559
558.65	26.5223	22.7531	23.5203	31.1176	22.2194	22.1902	25.9717	31.8438	27.8829	30.6563	28.9288	35.3322	34.9392	35.8218	37.6292	38.5864	22.4068	24.4515	30.6025	36.0571	19.9965	22.1532	21.284	28.6047
559.1	26.509	22.8033	23.5189	31.1714	22.2178	22.2436	25.9375	31.8371	27.9082	30.7093	28.8528	35.3523	35.0654	35.8764	37.5642	38.5319	22.2642	24.315	30.6245	36.0714	19.9832	22.1981	21.2539	28.6386
559.55	26.4609	22.8252	23.4983	31.1583	22.1998	22.2884	25.9728	31.8285	27.917	30.7747	28.8106	35.3973	35.2022	35.8984	37.5001	38.4401	22.1197	24.4742	30.6073	36.1805	19.9503	22.235	21.263	28.6129
560	26.4862	22.7781	23.4251	31.1473	22.1456	22.334	26.0535	31.8285	27.904	30.8563	28.7877	35.4183	35.2825	35.9663	37.4064	38.354	22.011	24.7343	30.636	36.1852	19.9636	22.2727	21.2591	28.6611
560.45	26.5187	22.7931	23.3664	31.1487	22.0775	22.3479	26.0829	31.8007	27.8354	30.8514	28.7738	35.4126	35.2615	36.0552	37.3394	38.3005	21.8738	24.9541	30.636	36.1651	20.0044	22.3277	21.2662	28.5745
560.9	26.5983	22.8376	23.3338	31.1394	22.0087	22.2919	26.1219	31.7838	27.7472	30.8267	28.7719	35.38	35.1257	36.0466	37.3538	38.3368	21.8025	25.1014	30.6283	36.146	20.0159	22.3076	21.2763	28.5403
561.35	26.6532	22.8913	23.2925	31.1271	22.0202	22.2422	26.0541	31.7879	27.6703	30.825	28.8046	35.3217	34.9813	36.0533	37.3873	38.355	21.744	25.0985	30.6895	36.0561	20.0437	22.28	21.2588	28.5444
561.8	26.6015	22.9772	23.3216	31.1068	22.0471	22.136	25.978	31.749	27.7037	30.8175	28.7983	35.2595	34.922	36.0361	37.4466	38.4917	21.7282	25.0523	30.6953	36.014	20.0597	22.2465	21.2493	28.4808
562.25	26.5442	22.9372	23.3391	31.0539	22.0947	22.0549	25.9255	31.7034	27.7786	30.8607	28.7911	35.1926	34.9191	35.9404	37.4705	38.6409	21.7529	25.0357	30.7689	36.0217	20.0751	22.1855	21.2425	28.5147
562.7	26.48	22.8683	23.3119	30.9964	22.1246	22.0264	25.8912	31.6639	27.8539	30.8971	28.7808	35.2127	35.0779	35.8897	37.4437	38.6677	21.8383	25.0364	30.7957	35.9854	20.0999	22.1285	21.2237	28.4945
563.15	26.4594	22.7838	23.2957	30.9485	22.1166	22.0093	25.9058	31.6253	27.9011	30.9028	28.7377	35.228	35.2567	35.8716	37.4112	38.7031	21.8983	25.0282	30.7479	35.9509	20.1084	22.0987	21.1929	28.4918
563.6	26.4968	22.6989	23.27	30.912	22.1338	22.0341	25.8846	31.6136	27.8783	30.9095	28.7105	35.2567	35.3887	35.862	37.3787	38.5262	21.9234	25.0213	30.7603	35.9165	20.1268	22.0883	21.1314	28.5089
564.05	26.5254	22.6457	23.2548	30.8904	22.1483	22.0449	25.8682	31.6238	27.8441	30.8999	28.6948	35.2873	35.4575	35.9127	37.3614	38.289	21.9161	25.0118	30.7374	35.862	20.1384	22.1312	21.0719	28.4929
564.5	26.5443	22.6073	23.2777	30.8395	22.1833	22.0448	25.8255	31.6258	27.8208	30.8818	28.7067	35.2003	35.4231	35.9548	37.3557	38.1131	21.8784	25.0065	30.706	35.884	20.2101	22.1923	21.0519	28.5164
564.95	26.5634	22.594	23.2989	30.786	22.218	22.0363	25.7687	31.6259	27.8115	30.8961	28.7258	35.1056	35.3466	35.9701	37.3461	37.9438	21.8503	24.9675	30.7942	35.9337	20.2669	22.2347	21.074	28.4625
565.4	26.5684	22.5743	23.3037	30.7159	22.2354	22.0312	25.7313	31.6203	27.8229	30.9018	28.7462	35.0167	35.2223	35.9442	37.3328	37.874	21.8612	24.9195	30.8843	35.9978	20.3164	22.2589	21.1692	28.4525
565.85	26.5979	22.5787	23.3108	30.6524	22.2343	22.0128	25.6964	31.6023	27.8169	30.9028	28.6966	34.988	35.185	35.8821	37.2993	37.8635	21.8617	24.8728	31.1359	36.0504	20.3638	22.2272	21.2284	28.416
566.3	26.5884	22.6117	23.2829	30.7016	22.2178	22.0167	25.6707	31.5734	27.8207	30.9143	28.5876	35.0377	35.2175	35.884	37.2496	37.8539	21.8767	24.8528	31.4905	36.1058	20.3061	22.1748	21.2477	28.3578
566.75	26.6633	22.6626	23.2646	30.7389	22.1907	22.0151	25.6532	31.5288	27.8269	30.8913	28.4594	35.0999	35.2529	35.8878	37.1817	37.8788	21.8858	24.893	31.6062	36.1097	20.2997	22.1226	21.2324	28.3994
567.2	26.7382	22.7212	23.249	30.7988	22.1695	22.0034	25.6675	31.5011	27.8451	30.7823	28.3706	35.1515	35.3064	36.0313	37.1281	37.8931	21.9742	24.8979	31.6359	36.0877	20.2929	22.0884	21.1254	28.3782
567.65	26.7666	22.7775	23.2256	30.8566	22.1752	22.0275	25.6798	31.4889	27.8805	30.679	28.4028	35.1525	35.3227	36.1996	37.1128	37.8749	22.127	24.911	31.3423	36.014	20.2746	22.0064	21.0772	28.3896
568.1	26.8281	22.7931	23.2313	30.8264	22.1751	21.9938	25.683	31.4718	27.9378	30.5844	28.4819	35.1037	35.3189	36.2359	37.1176	37.8654	22.212	24.8621	30.9791	35.9548	20.3206	21.961	21.0614	28.401
568.55	26.7165	22.7404	23.1867	30.8292	22.1173	21.9652	25.701	31.402	28	30.5126	28.5991	35.0597	35.3294	36.2646	37.1491	37.8051	22.3026	24.7631	30.8221	35.9529	20.3235	21.9152	21.0379	28.3824
569	26.6236	22.6649	23.1463	30.8272	22.0403	21.9496	25.6713	31.3155	27.983	30.6188	28.687	34.9975	35.316	36.1068	37.1453	37.7784	22.187	24.7854	30.667	36.0035	20.3118	21.8463	21.0936	28.4102
569.45	26.5693	22.6011	23.1159	30.8375	21.9521	21.9069	25.6337	31.2185	27.9591	30.7058	28.7153	34.9583	35.3112	35.9605	37.1625	37.7698	22.0391	24.7483	30.6639	36.1957	20.3067	21.9515	21.1099	28.4027
569.9	26.5368	22.5477	23.0676	30.8545	21.8987	21.8947	25.6101	31.1641	27.8658	30.7861	28.7041	34.9669	35.2156	35.8725	37.1654	37.7277	21.9727	24.7386	30.6083	36.2636	20.2585	22.0448	21.0988	28.4225
570.35	26.5552	22.5363	23.0951	30.8108	21.9671	21.8906	25.5627	31.2248	27.785	30.8559	28.6627	34.9937	35.1046	35.7673	37.2362	37.7066	21.9111	24.7972	30.4922	36.2742	20.1991	22.1355	21.1181	28.3927
570.8	26.531	22.5449	23.126	30.755	22.0424	21.8641	25.5341	31.2871	27.7804	30.8244	28.6053	35.0453	35.1553	35.7645	37.3691	37.7028	21.938	24.7751	30.4335	36.2292	20.1273	22.2426	21.0877	28.3617
571.25	26.4723	22.5243	23.1473	30.6834	22.1353	21.8671	25.5164	31.3482	27.7871	30.7842	28.5545	35.0635	35.2003	35.752	37.4207	37.6904	21.9554	24.8248	30.3767	36.0762	20.0038	22.249	21.0846	28.3796
571.7	26.3859	22.5235	23.1785	30.6222	22.2265	21.8879	25.4917	31.3644	27.8256	30.7201	28.5298	35.0492	35.2978	35.73	37.4743	37.6684	21.9191	24.9044	30.448	35.9691	19.9064	22.2696	21.0962	28.3478
572.15	26.3456	22.5132	23.1715	30.6282	22.2673	21.895	25.4826	31.3026	27.8234	30.6857	28.5319	35.0071	35.4651	35.7444	37.3815	37.6646	21.8612	24.935	30.5497	35.8936	19.8525	22.289	21.045	28.3783
572.6	26.3416	22.509	23.1607	30.633	22.303	21.9099	25.477	31.2459	27.8005	30.6771	28.537	34.9574	35.4661	35.7109	37.239	37.612	21.8298	24.9664	30.6859	35.8295	19.8583	22.2913	21.0134	28.3431
573.05	26.3844	22.5267	23.1384	30.5869	22.3051	21.8853	25.472	31.2061	27.7676	30.7039	28.538	34.9392	35.4862	35.6784	37.1434	37.545	21.7959	24.9963	30.912	35.797	19.984	22.2965	20.9612	28.265
573.5	26.4299	22.5011	23.1184	30.5433	22.2651	21.8636	25.4569	31.2021	27.7396	30.7622	28.5342	34.921	35.5015	35.6803	37.0564	37.5565	21.7923	24.971	30.9994	35.8467	20.1215	22.2531	20.9203	28.2427
573.95	26.4503	22.5082	23.0818	30.475	22.2085	21.8422	25.4363	31.2576	27.7429	30.8072	28.4853	34.9239	35.4804	35.6899	37.0114	37.5297	21.8113	24.9583	31.0606	35.8907	20.2412	22.1986	20.896	28.1857
574.4	26.4298	22.5118	23.0422	30.4132	22.1675	21.8504	25.4181	31.3076	27.7193	30.8464	28.4597	34.9287	35.5397	35.7406	36.9837	37.4944	21.8242	24.9696	31.0223	35.9471	20.3	22.121	20.8948	28.2139
574.85	26.3877	22.5168	23.0523	30.4688	22.1493	21.9008	25.389	31.3396	27.69	30.8617	28.4285	34.8904	35.5713	35.7941	36.978	37.5087	21.8481	24.9329	30.9114	35.9978	20.2845	22.0385	20.8977	28.2337
575.3	26.321	22.4908	23.0663	30.5178	22.1565	21.9095	25.3743	31.3318	27.6641	30.8588	28.4869	34.8292	35.6124	35.8218	36.9952	37.4762	21.8599	24.962	30.876	35.927	20.2542	22.0366	20.8754	28.2252
575.75	26.2471	22.4152	23.1079	30.5629	22.1945	21.9286	25.3087	31.2911	27.6736	30.8655	28.6062	34.7403	35.6459	35.7539	37.043	37.4685	21.8395	25.0016	30.788	35.8917	20.2148	22.0662	20.9445	28.2466
576.2	26.2264	22.3355	23.1461	30.6021	22.2206	21.9093	25.214	31.2545	27.7125	30.8569	28.6976	34.6275	35.5617	35.6411	37.0669	37.4695	21.8685	25.0192	30.7479	35.8544	20.2238	22.1472	20.9518	28.2162
576.65	26.1986	22.2314	23.1337	30.5575	22.2017	21.8521	25.1356	31.3067	27.7306	30.8514	28.7801	34.5701	35.5206	35.5063	37.0459	37.4245	21.8873	25.0618	30.6924	35.8362	20.2319	22.2034	20.9624	28.2485
577.1	26.2153	22.274	23.1913	30.5208	22.1831	21.8193	25.0716	31.391	27.7423	30.7829	28.6816	34.5911	35.4652	35.3896	36.9961	37.3614	21.9968	25.0347	30.5977	35.9366	20.249	22.1911	20.9849	28.272
577.55	26.1607	22.3378	23.2541	30.4743	22.1165	21.779	25.1193	31.4336	27.6756	30.6608	28.5497	34.6179	35.404	35.424	36.9359	37.2964	22.1795	25.0253	30.5786	35.9538	20.3256	22.1592	20.9697	28.2455
578	26.0743	22.4123	23.3027	30.4502	22.0546	21.7441	25.2045	31.4672	27.6104	30.531	28.4505	34.6896	35.4977	35.5015	36.889	37.2524	22.239	25.0019	30.5461	36.014	20.3722	22.1331	21.0129	28.2451
578.45	25.9783	22.5079	23.3903	30.4605	22.0666	21.7339	25.2799	31.345	27.6168	30.4338	28.3828	34.7307	35.4546	35.5531	36.846	37.2199	22.3014	25.0921	30.4849	36.0609	20.4546	22.1516	21.0452	28.1808
578.9	25.8724	22.4946	23.3178	30.4646	22.0855	21.731	25.3349	31.2143	27.6239	30.4887	28.4104	34.725	35.4269	35.5952	36.7886	37.2103	22.2318	25.2325	30.4505	36.2378	20.5328	22.1844	21.0566	28.1625
579.35	25.9486	22.5023	23.2276	30.4665	22.1242	21.7328	25.3247	31.1247	27.6521	30.5574	28.4358	34.7326	35.3982	35.5331	36.7619	37.1817	22.0878	25.2889	30.4161	36.5056	20.483	22.2183	21.0266	28.1771
579.8	26.0498	22.4739	23.1671	30.4314	22.1651	21.736	25.3093	31.028	27.6722	30.6528	28.4453	34.7183	35.294	35.4699	36.7485	37.1405	21.9943	25.3861	30.4247	36.6614	20.4349	22.2136	20.9698	28.2027
580.25	26.1657	22.4564	23.0614	30.3903	22.1634	21.723	25.2952	30.998	27.6525	30.7185	28.4407	34.7087	35.3188	35.4776	36.7293	37.0898	21.8823	25.2718	30.4945	36.8068	20.3425	22.1859	20.9423	28.2831
580.7	26.2638	22.4671	23.0322	30.3599	22.1445	21.7205	25.2821	30.9667	27.6149	30.679	28.4242	34.7193	35.3351	35.4871	36.6892	37.0793	21.7909	25.1627	30.6255	36.6347	20.2385	22.1558	20.9205	28.2854
581.15	26.2564	22.4387	22.9879	30.3489	22.1199	21.7177	25.2904	30.9425	27.6052	30.6741	28.4193	34.7078	35.3418	35.5369	36.5945	37.086	21.7647	25.1234	30.6666	36.43	20.2188	22.118	20.9297	28.3183
581.6	26.2282	22.435	22.9348	30.3178	22.0739	21.7631	25.2796	30.935	27.5874	30.6501	28.4089	34.6781	35.381	35.5962	36.4807	37.0516	21.7852	25.0788	30.7058	36.3076	20.179	22.1132	20.9422	28.3023
582.05	26.256	22.3931	22.9022	30.2679	22.0266	21.8041	25.2749	30.9203	27.5756	30.6263	28.387	34.6485	35.4422	35.6124	36.41	36.9483	21.8172	25.1363	30.6953	36.1948	20.1529	22.1259	20.931	28.255
582.5	26.3046	22.3411	22.876	30.2062	22.0006	21.8042	25.2814	30.9136	27.5985	30.6369	28.3792	34.594	35.5292	35.6191	36.4071	36.7705	21.8823	25.1507	30.5943	36.2349	20.1481	22.1262	20.8626	28.238
582.95	26.3786	22.3101	22.8822	30.1367	22.0004	21.8089	25.2715	30.8921	27.5916	30.6164	28.382	34.5577	35.5923	35.6248	36.4434	36.6003	21.8824	25.1212	30.5239	36.2531	20.1398	22.0866	20.7839	28.1399
583.4	26.4538	22.2965	22.8961	30.1488	22.0292	21.7366	25.2705	30.8786	27.5958	30.6178	28.3737	34.5691	35.5789	35.6124	36.5218	36.5257	21.8446	25.075	30.3904	36.2407	20.1906	22.0214	20.7139	28.0937
583.85	26.4289	22.2957	22.9202	30.1731	22.0581	21.6723	25.2211	30.8866	27.5679	30.6173	28.3465	34.5624	35.5063	35.6162	36.584	36.6289	21.8084	25.0221	30.2627	36.2158	20.2369	21.9163	20.6192	28.0773
584.3	26.3774	22.2836	22.9344	30.2058	22.0997	21.637	25.1032	30.8869	27.5503	30.6264	28.2222	34.5701	35.4986	35.5732	36.606	36.7456	21.7766	24.9901	30.1982	36.1604	20.2294	21.8339	20.6766	28.1087
584.75	26.3089	22.2671	22.9298	30.2276	22.1311	21.5762	24.9865	30.9212	27.5636	30.6465	28.0684	34.5605	35.5244	35.4604	36.6022	36.8517	21.7871	24.986	30.259	36.1211	20.2302	21.7803	20.7177	28.2041
585.2	26.2485	22.2192	22.901	30.2172	22.1193	21.5437	24.8751	30.982	27.5617	30.636	27.927	34.5318	35.6229	35.3542	36.5735	36.9063	21.821	24.9679	30.3696	36.0705	20.2099	21.7693	20.7571	28.2728
585.65	26.2269	22.2128	22.9321	30.2138	22.144	21.5232	24.8374	31.0315	27.5786	30.6585	27.846	34.5318	35.7377	35.2414	36.5486	36.8575	21.8669	24.9681	30.5748	36.0341	20.2235	21.8094	20.8445	28.2752
586.1	26.2139	22.2365	22.9809	30.21	22.1126	21.4929	24.9119	31.0666	27.533	30.636	27.9409	34.4745	35.688	35.2357	36.539	36.8412	21.948	24.962	30.7316	35.9834	20.319	21.8502	20.8357	28.2181
586.55	26.2174	22.2762	23.0385	30.2337	22.0754	21.4925	24.9827	31.0547	27.4463	30.5833	28.011	34.3262	35.6612	35.3552	36.5419	36.8106	22.017	24.9726	30.7928	35.9777	20.3698	21.9795	20.859	28.1699
587	26.2142	22.347	23.1133	30.2189	22.1008	21.499	25.0528	30.9705	27.3824	30.5392	28.0737	34.1426	35.6392	35.4575	36.5266	36.7791	22.0628	24.9987	30.8636	36.0217	20.3971	22.056	20.8605	28.0824
587.45	26.2308	22.3758	23.0571	30.187	22.0732	21.5096	25.085	30.8796	27.3494	30.4339	28.0767	33.9648	35.6602	35.5388	36.4893	36.7552	22.1205	25.0364	30.8559	36.0121	20.3895	22.0998	20.8342	28.0436
587.9	26.2577	22.3856	22.9859	30.1468	22.0624	21.5445	25.0693	30.7963	27.3805	30.365	28.0037	33.8663	35.7425	35.5589	36.4444	36.6959	22.0765	25.1109	30.9009	35.9108	20.332	22.1615	20.8425	28.0414
588.35	26.239	22.3811	22.921	30.0701	22.0541	21.5651	25.0664	30.7246	27.456	30.3785	27.9971	33.9801	35.7932	35.4986	36.3975	36.6614	22.0284	25.1	30.9525	35.7377	20.2995	22.1619	20.8298	27.9757
588.8	26.3047	22.353	22.8544	30.0549	22.038	21.6222	25.0515	30.6733	27.5208	30.4053	28.0056	34.1111	35.8496	35.4489	36.3583	36.6395	21.9993	25.0039	30.9745	35.5512	20.2585	22.1822	20.8269	27.9988
589.25	26.3786	22.3483	22.855	30.0557	22.0559	21.6592	25.0491	30.6391	27.5352	30.4652	28.0416	34.2182	35.796	35.4374	36.366	36.5993	21.9425	24.8507	30.9908	35.4804	20.2217	22.2404	20.816	28.0147
589.7	26.4745	22.3451	22.8764	30.0462	22.0932	21.6605	25.0368	30.6353	27.5027	30.521	28.0934	34.3081	35.7683	35.4365	36.3956	36.5897	21.9476	24.6424	30.7416	35.6727	20.2117	22.2587	20.7827	28.0052
590.15	26.5967	22.3282	22.8659	30.0731	22.1216	21.6807	24.9943	30.6384	27.4431	30.5438	28.1036	34.3176	35.7788	35.4604	36.3918	36.5716	21.9451	24.5658	30.5239	35.8869	20.2505	22.2708	20.7458	28.0871
590.6	26.5615	22.2898	22.8467	30.0811	22.1138	21.6424	24.9686	30.6791	27.3844	30.5627	28.1274	34.3358	35.7425	35.4709	36.431	36.5582	21.9321	24.6576	30.3216	36.0905	20.3547	22.2717	20.7256	28.0846
591.05	26.5081	22.2343	22.8147	30.0924	22.0908	21.6027	24.9321	30.7056	27.3672	30.5929	28.1713	34.3607	35.7234	35.4929	36.43	36.5639	21.9382	24.7622	30.1556	36.2235	20.4415	22.2262	20.7614	28.0954
591.5	26.4022	22.1696	22.7612	30.13	22.0583	21.579	24.9205	30.7136	27.3593	30.6014	28.1807	34.3693	35.6851	35.5063	36.4616	36.5161	21.9409	24.9112	30.4287	36.2397	20.4956	22.1648	20.7817	28.1171
591.95	26.3044	22.1267	22.7759	30.1508	22.0183	21.5153	24.9426	30.7194	27.3642	30.5738	28.1949	34.3415	35.6373	35.4785	36.584	36.3994	21.9486	25.0021	30.6358	36.2493	20.4954	22.0914	20.8025	28.0631
592.4	26.2759	22.1408	22.7935	30.1569	21.9969	21.4642	25.0015	30.6795	27.3883	30.5586	28.1448	34.31	35.6267	35.4719	36.6136	36.255	21.9451	25.012	30.8181	36.2531	20.4153	22.0428	20.8291	28.0931
592.85	26.2163	22.1562	22.8343	30.1517	21.9985	21.4287	25.0769	30.6606	27.4024	30.508	28.0804	34.265	35.818	35.4106	36.6452	36.1231	21.9285	25.0493	30.9391	36.2875	20.423	22.0085	20.7933	28.0489
593.3	26.1541	22.2025	22.903	30.1272	22.0269	21.3903	25.1086	30.6171	27.4393	30.4716	28.0261	34.2488	36.0131	35.4001	36.5735	36.0781	21.9204	25.0696	30.8263	36.2866	20.4511	22.0306	20.8277	28.0268
593.75	26.0745	22.2652	22.8884	30.0904	22.0505	21.3804	25.1218	30.5701	27.4342	30.4714	28.053	34.2373	36.1661	35.4355	36.4425	36.1518	21.9184	25.0552	30.7125	36.3248	20.4565	22.0661	20.8798	28.0095
594.2	25.9796	22.2937	22.968	30.0712	21.9986	21.3865	25.0428	30.5669	27.4121	30.449	28.1703	34.2392	36.2722	35.5837	36.3793	36.2149	21.9198	25.0405	30.6169	36.3564	20.5005	22.0612	20.9061	27.9437
594.65	25.9116	22.3145	23.0369	30.0588	21.9321	21.3984	24.9369	30.5458	27.3628	30.4799	28.2547	34.2526	36.08	35.754	36.3114	36.2589	21.9223	25.0078	30.548	36.3507	20.4234	22.0615	20.9675	27.9953
595.1	25.9103	22.3108	23.0616	30.0508	21.8311	21.4181	24.8594	30.545	27.3021	30.4944	28.3296	34.2344	35.9289	35.8343	36.2847	36.234	21.9053	24.9805	30.5815	36.3822	20.3531	22.048	20.9535	28.0058
595.55	25.9537	22.2679	23.1385	30.0612	21.7854	21.4462	24.7997	30.5622	27.314	30.548	28.279	34.2363	35.7999	35.9012	36.2569	36.1556	21.8829	25.006	30.6494	36.3698	20.349	22.0356	20.9321	28.0547
596	26.0346	22.2266	23.0437	30.0276	21.8748	21.4315	24.7838	30.5437	27.3077	30.6124	28.17	34.2029	35.708	35.7291	36.2187	36.1011	21.9592	25.0264	30.6953	36.3736	20.3414	22.0687	20.9154	28.0972
596.45	26.1254	22.19	22.9505	29.9686	21.9571	21.3425	24.7974	30.5112	27.3248	30.7181	28.0916	34.1818	35.775	35.556	36.1957	36.0523	22.0452	25.0732	30.8081	36.4262	20.3754	22.1039	20.8688	28.0554
596.9	26.1831	22.1801	22.8919	29.9031	22.0538	21.2588	24.806	30.492	27.3401	30.8797	28.0383	34.157	35.7884	35.4193	36.1833	36.0532	22.2276	25.1098	30.7479	36.4338	20.3731	22.1579	20.8194	28.0451
597.35	26.2061	22.196	22.8124	29.8167	22.115	21.1584	24.7916	30.4573	27.3039	30.9387	28.0181	34.0604	35.7998	35.2873	36.189	36.0705	22.4197	25.1198	30.7096	36.388	20.3039	22.186	20.7684	28
597.8	26.211	22.2451	22.8135	29.7766	22.105	21.1283	24.7804	30.4444	27.2799	30.9852	28.0141	33.9896	35.7865	35.2634	36.1804	36.0896	22.4419	25.136	30.7001	36.1613	20.2368	22.1787	20.7331	27.9883
598.25	26.2109	22.3123	22.7933	29.7747	22.0846	21.2064	24.7394	30.468	27.2648	30.8935	27.9986	33.9313	35.7578	35.2691	36.1623	36.0982	22.4353	25.0972	30.6542	35.8391	20.201	22.1627	20.7308	27.9937
598.7	26.2284	22.3364	22.7579	29.7713	22.0411	21.2578	24.7137	30.4588	27.2436	30.7395	27.9757	33.8988	35.7272	35.3083	36.1489	36.0972	22.2589	25.1202	30.7202	35.4996	20.2252	22.1126	20.74	27.9973
599.15	26.2304	22.3756	22.7409	29.7973	22.011	21.3331	24.708	30.4499	27.2659	30.626	27.9625	33.9734	35.754	35.3208	36.1173	36.081	22.0792	25.1311	30.7661	35.271	20.2762	22.0961	20.7542	28.0219
599.6	26.2184	22.3769	22.7229	29.8076	21.9832	21.3734	24.7039	30.4372	27.318	30.5523	27.9476	34.0642	35.819	35.3456	36.1097	36.0733	21.9848	25.2875	30.7823	35.382	20.3333	22.0945	20.7587	27.9864
600.05	26.1904	22.3661	22.7132	29.7881	21.9896	21.3637	24.7229	30.4012	27.3722	30.5406	27.9429	34.1092	36.015	35.3265	36.0858	36.0456	21.9154	25.517	30.7182	35.5541	20.388	22.0423	20.7346	27.9826
600.5	26.1199	22.3684	22.7284	29.7985	22.0223	21.3858	24.7231	30.3981	27.4412	30.5572	27.9161	34.1283	36.2713	35.2576	36.081	36.014	21.9287	25.6245	30.6197	35.819	20.3957	21.9844	20.7312	27.9622
600.95	26.0615	22.3287	22.7371	29.7862	22.0445	21.3788	24.717	30.38	27.4806	30.5934	27.9065	34.1034	36.432	35.227	36.0848	35.9901	21.9398	25.7666	30.5098	36.0772	20.4518	21.9464	20.7418	27.8975
601.4	26.0583	22.303	22.7556	29.7637	22.0911	21.3747	24.7354	30.3687	27.4945	30.5871	27.9089	34.0633	36.562	35.1611	36.1671	35.928	21.9626	25.6285	30.4705	36.1977	20.5022	21.9209	20.7363	27.9128
601.85	26.062	22.2716	22.7863	29.7643	22.1089	21.3951	24.74	30.352	27.483	30.591	27.9098	34.0384	36.4013	35.1305	36.2809	35.8362	21.9964	25.4528	30.5031	36.3296	20.5253	21.9992	20.7175	27.8939
602.3	26.0999	22.2542	22.7718	29.7384	22.0929	21.4035	24.7381	30.3123	27.4461	30.6162	27.8929	34.0327	36.1948	35.1266	36.3382	35.7185	22.0113	25.3135	30.6035	36.3841	20.5551	22.0783	20.7118	27.8787
602.75	26.1665	22.2596	22.7623	29.7295	21.9921	21.4185	24.746	30.3194	27.4603	30.6109	27.7998	34.0135	36.0083	35.0434	36.3946	35.5933	22.0431	25.1537	30.6771	36.4033	20.5275	22.1003	20.6733	27.9254
603.2	26.1815	22.2391	22.7462	29.7265	21.8728	21.4301	24.7267	30.3041	27.4703	30.6196	27.6679	33.9982	35.84	34.9612	36.2751	35.5139	22.0392	25.1137	30.6789	36.3813	20.4841	22.1033	20.6714	27.9018
603.65	26.2071	22.233	22.7399	29.7187	21.7494	21.4419	24.7276	30.2958	27.5789	30.6374	27.5205	34.0097	35.8505	34.8608	36.1498	35.555	22.0245	25.0819	30.7333	36.3287	20.4524	22.074	20.6554	27.9
604.1	26.2453	22.2275	22.7708	29.7292	21.7026	21.4412	24.7537	30.3093	27.7375	30.6389	27.4482	34.0088	35.8113	34.7613	36.0456	35.5828	22.0358	25.0989	30.6893	36.2665	20.4264	22.0586	20.6019	27.931
604.55	26.257	22.2074	22.7624	29.7317	21.8113	21.475	24.7627	30.2993	27.7971	30.6852	27.4886	34.0269	35.8027	34.7958	35.9366	35.6296	22.0138	25.093	30.6911	36.1211	20.3943	22.0679	20.5464	27.9536
605	26.2879	22.2276	22.7492	29.7466	21.9083	21.5173	24.7664	30.2955	27.8497	30.6919	27.5486	34.025	35.774	34.9325	35.9251	35.6736	22.0199	25.1243	30.7378	36.0274	20.3725	22.0812	20.4705	28.0026
605.45	26.3094	22.2673	22.7039	29.754	22.0305	21.5038	24.7501	30.3092	27.7278	30.6869	27.6384	34.0088	35.6698	35.0769	35.9137	35.6822	22.0077	25.128	30.6995	35.9653	20.3737	22.0632	20.521	28.022
605.9	26.2666	22.2957	22.6305	29.752	22.0909	21.4962	24.7312	30.3065	27.5526	30.6623	27.6853	34.0059	35.6736	35.2299	35.9223	35.7262	22.0253	25.1266	30.7768	36.0686	20.3188	22.0714	20.6046	27.9814
606.35	26.2172	22.3309	22.6007	29.7458	22.0757	21.4269	24.7169	30.2907	27.4233	30.5826	27.7133	33.9868	35.6488	35.3112	35.9395	35.7425	22.0655	25.1866	30.836	36.2866	20.3017	22.0858	20.7252	27.9259
606.8	26.1441	22.3312	22.5698	29.723	22.0768	21.3583	24.7251	30.2923	27.3076	30.593	27.7483	33.9829	35.6134	35.3169	35.9289	35.732	22.2008	25.1929	30.8601	36.4798	20.293	22.0947	20.8512	27.8845
607.25	26.0903	22.2795	22.5662	29.6333	22.0788	21.3254	24.7334	30.2752	27.2952	30.582	27.7565	33.9686	35.5397	35.3236	35.9232	35.6985	22.3641	25.2163	30.8976	36.6643	20.2571	22.1301	20.877	27.8484
607.7	26.0911	22.2953	22.5861	29.5405	22.1166	21.298	24.7165	30.2718	27.2947	30.5678	27.7602	33.9581	35.4556	35.2873	35.9165	35.6497	22.4557	25.2103	30.8481	36.6911	20.319	22.1249	20.8753	27.8672
608.15	26.1076	22.3142	22.577	29.4552	22.1617	21.297	24.6939	30.2738	27.3017	30.6239	27.7205	33.9303	35.4403	35.2356	35.9022	35.5952	22.5322	25.1627	30.8674	36.7131	20.3578	22.1152	20.8442	27.8763
608.6	26.1459	22.3722	22.582	29.3889	22.1915	21.2928	24.5735	30.2811	27.3186	30.6005	27.6834	33.8577	35.4919	35.2165	35.9031	35.5541	22.4116	25.157	30.9102	36.6806	20.3865	22.1253	20.7841	27.8451
609.05	26.1714	22.4568	22.6252	29.4429	22.2039	21.2835	24.4601	30.2942	27.3145	30.5921	27.6553	33.719	35.7616	35.163	35.8993	35.512	22.2767	25.1577	31.0074	36.6232	20.4317	22.1225	20.7389	27.8561
609.5	26.1827	22.4224	22.6595	29.4886	22.1804	21.2763	24.3583	30.2579	27.3411	30.5927	27.6541	33.5679	35.9089	35.1477	35.8878	35.4795	22.1846	25.1415	31.1133	36.5591	20.4419	22.1205	20.7074	27.824
609.95	26.1874	22.3869	22.7115	29.5308	22.1624	21.2793	24.2804	30.1897	27.3799	30.5339	27.6849	33.4656	36.0054	35.1658	35.8831	35.4766	22.1169	25.0591	31.1264	36.4358	20.4382	22.1221	20.6676	27.8034
610.4	26.1864	22.3057	22.7485	29.5479	22.1713	21.2651	24.3525	30.0895	27.4074	30.4964	27.7159	33.4493	36.015	35.1601	35.9117	35.5015	22.1231	24.9441	31.1467	36.3669	20.4529	22.1176	20.6406	27.8222
610.85	26.1626	22.2064	22.6911	29.5259	22.1512	21.2836	24.4111	29.9795	27.4317	30.495	27.7502	33.567	35.8945	35.2098	35.9117	35.4977	22.1541	24.8535	31.0715	36.2675	20.4475	22.1005	20.6249	27.7806
611.3	26.1199	22.1716	22.6287	29.5187	22.1411	21.3016	24.4744	29.9455	27.4667	30.4867	27.7769	33.6731	35.9184	35.229	35.9519	35.4747	22.1781	24.8551	31.0239	36.1881	20.4542	22.1026	20.6215	27.7416
611.75	26.0773	22.1199	22.5579	29.5202	22.1148	21.2895	24.5025	29.9819	27.4897	30.4948	27.7956	33.7487	35.9614	35.0951	36.0016	35.3667	22.1634	24.9928	30.9984	36.2216	20.5044	22.0911	20.6405	27.6943
612.2	26.0222	22.0954	22.4972	29.5424	22.0556	21.2935	24.4617	30.0393	27.5971	30.522	27.7866	33.7917	36.0552	34.9239	35.9748	35.2051	22.1614	25.1573	30.921	36.2225	20.5786	22.0757	20.7089	27.6572
612.65	26.0033	22.112	22.4727	29.5568	22.0605	21.2524	24.4535	30.0837	27.7127	30.5023	27.7608	33.7793	36.1374	34.7145	35.9844	35.0798	22.098	25.2923	30.8722	36.2818	20.6336	22.0949	20.7469	27.6638
613.1	26.0322	22.0932	22.4619	29.5672	22.0756	21.2086	24.4628	30.0815	27.7415	30.4964	27.6826	33.7859	36.1374	34.572	35.9328	34.9966	22.045	25.3462	30.7998	36.3191	20.6686	22.1	20.763	27.7048
613.55	26.0632	22.1157	22.4627	29.557	22.0916	21.2156	24.4999	30.0444	27.7899	30.4848	27.573	33.7917	36.0924	34.682	35.8563	35.0606	22.0318	25.3287	30.8106	36.2799	20.6792	22.1137	20.7758	27.7595
614	26.1335	22.1722	22.4532	29.5196	22.1459	21.2232	24.5276	30.0122	27.682	30.4964	27.5153	33.7859	36.0293	34.8292	35.8295	35.1534	22.0322	25.3263	30.9237	36.2646	20.5759	22.1367	20.7149	27.7724
614.45	26.1763	22.182	22.473	29.461	22.1631	21.2556	24.522	30.0421	27.566	30.519	27.4821	33.7773	35.9949	34.9851	35.7865	35.2299	22.1047	25.3275	30.9957	36.2464	20.5544	22.1207	20.6348	27.777
614.9	26.1604	22.2319	22.4831	29.4109	22.165	21.3096	24.4946	30.0754	27.5199	30.6359	27.4948	33.7572	35.9729	35.1066	35.7272	35.2949	22.1462	25.3415	31.1704	36.2502	20.5432	22.1285	20.545	27.7326
615.35	26.2242	22.2555	22.49	29.3729	22.178	21.3341	24.4571	30.1014	27.4299	30.788	27.5499	33.7439	35.9165	35.1018	35.6861	35.2557	22.1642	25.3562	31.2333	36.2569	20.5368	22.1478	20.4627	27.6626
615.8	26.2713	22.2024	22.4954	29.324	22.1504	21.3579	24.4546	30.1204	27.3972	30.8678	27.5857	33.72	35.9089	35.0922	35.644	35.1955	22.2197	25.3254	31.3582	36.2426	20.6069	22.1502	20.4341	27.6092
616.25	26.3502	22.1744	22.4799	29.3075	22.1309	21.3721	24.475	30.0849	27.3837	30.9534	27.6022	33.6951	35.9203	35.1066	35.6009	35.1429	22.2173	25.2807	31.6056	36.2885	20.5975	22.1728	20.4886	27.5489
616.7	26.4564	22.1527	22.4626	29.2807	22.1321	21.3292	24.4681	30.066	27.3536	30.8552	27.6003	33.6626	36.0294	35.0903	35.6076	35.0645	22.1774	25.2576	31.6993	36.3946	20.5557	22.1607	20.5676	27.5805
617.15	26.4234	22.1293	22.4512	29.2589	22.1223	21.2881	24.4132	30.0631	27.3422	30.7102	27.5837	33.6205	36.2302	35.1046	35.6105	35.0214	22.1151	25.2408	31.7768	36.4501	20.4751	22.1999	20.6271	27.6518
617.6	26.3559	22.1538	22.3906	29.3088	22.1288	21.2472	24.3194	30.0417	27.3618	30.6141	27.561	33.609	36.2981	35.1362	35.5885	35.0071	21.9703	25.2552	31.5722	36.5792	20.4065	22.2296	20.6681	27.7365
618.05	26.2499	22.1692	22.3278	29.3425	22.1343	21.2006	24.2055	30.0011	27.3669	30.5277	27.5595	33.5842	36.3248	35.1285	35.5751	34.9889	21.8407	25.2656	31.3283	36.605	20.3512	22.2431	20.6759	27.8401
618.5	26.1632	22.1546	22.2718	29.3854	22.1254	21.2008	24.1382	29.9645	27.3677	30.5086	27.5773	33.5765	36.213	35.1697	35.5541	34.9851	21.8138	25.2645	31.1428	36.5486	20.3374	22.2748	20.6779	27.8425
618.95	26.1236	22.1482	22.1982	29.4293	22.1237	21.2068	24.1729	29.9176	27.3634	30.5104	27.578	33.589	36.0848	35.161	35.5206	34.9698	21.8412	25.2617	31.074	36.561	20.3718	22.1875	20.691	27.7863
619.4	26.1237	22.1385	22.2637	29.4377	22.0975	21.2474	24.2208	29.8855	27.3259	30.4863	27.5808	33.5756	36.1058	35.1046	35.5397	34.9516	21.9227	25.2104	31.183	36.4979	20.4085	22.1258	20.6975	27.7247
619.85	26.1085	22.1394	22.3374	29.4383	22.0755	21.2881	24.2702	29.906	27.3306	30.4331	27.5812	33.5593	36.1059	35.0138	35.5531	34.9296	22.0239	25.2257	31.2528	36.4778	20.4614	22.106	20.6874	27.6648
620.3	26.0586	22.1449	22.4086	29.4253	22.0529	21.3169	24.3034	29.9008	27.3361	30.411	27.573	33.5488	36.0915	34.7814	35.5943	34.9201	22.0753	25.2117	31.2968	36.5161	20.5355	22.1148	20.6957	27.6655
620.75	26.0107	22.1344	22.4872	29.4076	22.0257	21.3527	24.2845	29.8908	27.4491	30.3984	27.5883	33.5058	36.0886	34.6007	35.6392	34.9354	22.0986	25.271	31.2193	36.5123	20.5996	22.1869	20.6996	27.7173
621.2	25.9505	22.1193	22.4709	29.3778	22.0547	21.3168	24.2836	29.8911	27.5979	30.4012	27.6093	33.565	36.0026	34.484	35.6421	34.9038	22.0842	25.4106	31.095	36.4855	20.6542	22.2549	20.7049	27.7751
621.65	25.9609	22.0939	22.4495	29.3477	22.0632	21.2924	24.3	29.8616	27.6923	30.4495	27.611	33.6616	35.9318	34.4879	35.6478	34.9105	22.0559	25.4795	31.0462	36.4157	20.7083	22.2898	20.7037	27.7907
622.1	25.993	22.0826	22.4222	29.3227	22.0735	21.2657	24.3148	29.8428	27.7971	30.493	27.6347	33.74	35.9462	34.6982	35.5818	34.8952	22.0444	25.5643	31.0109	36.2904	20.673	22.2716	20.6759	27.8034
622.55	26.0414	22.0707	22.3969	29.2836	22.0859	21.2293	24.3388	29.8413	27.6995	30.5527	27.6157	33.8366	35.9337	34.8723	35.5168	34.8532	22.0524	25.5075	31.0367	36.1403	20.6643	22.2284	20.6517	27.7938
623	26.076	22.0417	22.3908	29.2563	22.0692	21.2247	24.3391	29.8487	27.5541	30.6289	27.5534	33.7582	36.0102	35.0224	35.4718	34.8799	22.0772	25.4128	31.0855	36.0695	20.6294	22.1733	20.6303	27.7428
623.45	26.0698	22.0225	22.3969	29.2419	22.0793	21.216	24.3301	29.8833	27.4118	30.6278	27.4991	33.6731	36.1173	35.0951	35.4212	34.834	22.1056	25.3235	31.0195	36.0886	20.5985	22.1297	20.6319	27.6948
623.9	26.0583	21.9815	22.3965	29.2226	22.0888	21.2078	24.3266	29.923	27.2706	30.5836	27.424	33.5899	36.1824	35.0673	35.3992	34.7824	22.1451	25.2465	30.9506	36.1651	20.6256	22.1081	20.649	27.6335
624.35	26.0084	21.9814	22.3688	29.2264	22.1007	21.1789	24.3029	29.9359	27.2399	30.4917	27.4148	33.5105	36.1747	35.0568	35.3992	34.7422	22.1685	25.2358	30.9066	36.3287	20.6143	22.1121	20.6568	27.6014
624.8	25.9811	21.9892	22.3365	29.2219	22.1327	21.1515	24.2799	29.9185	27.2334	30.3483	27.4329	33.4885	36.0686	35.01	35.3657	34.6619	22.2139	25.2321	30.8688	36.4606	20.6495	22.1041	20.688	27.6028
625.25	25.9636	21.9822	22.295	29.2087	22.1591	21.1225	24.2375	29.8719	27.2396	30.302	27.4549	33.4235	35.9404	34.987	35.3332	34.6361	22.2534	25.2417	30.9418	36.5314	20.6643	22.0893	20.6956	27.6769
625.7	25.9526	21.9943	22.2782	29.2016	22.1813	21.0969	24.1454	29.8404	27.2461	30.3316	27.4569	33.3843	35.84	34.9755	35.3322	34.6217	22.2764	25.2568	31.1612	36.6108	20.6893	22.0407	20.6901	27.742
626.15	25.9901	21.9864	22.3363	29.1734	22.1838	21.0864	24.0505	29.8192	27.2525	30.3809	27.4263	33.3623	35.9137	34.9641	35.3074	34.615	22.2975	25.2939	31.3547	36.6337	20.7372	21.9798	20.7071	27.7678
626.6	26.007	22.0039	22.3899	29.1476	22.1443	21.0826	23.9661	29.8204	27.2845	30.4892	27.4137	33.3757	36.0045	35.0138	35.3112	34.6217	22.2774	25.3199	31.5421	36.6318	20.7325	21.9602	20.6777	27.8297
627.05	26.0232	22.0497	22.4413	29.1302	22.1328	21.0838	23.9332	29.8446	27.3217	30.5342	27.4051	33.4034	36.1336	35.0329	35.3351	34.6074	22.1354	25.3557	31.6186	36.6117	20.7411	21.931	20.6754	27.8103
627.5	26.0412	22.0904	22.4861	29.1149	22.1368	21.0819	23.9907	29.8241	27.3502	30.5187	27.4134	33.4006	36.2627	35.0597	35.3303	34.6016	21.9566	25.393	31.457	36.518	20.6275	21.9881	20.6669	27.7062
627.95	26.0499	22.1281	22.4654	29.1179	22.152	21.0578	24.0601	29.8146	27.387	30.5015	27.4262	33.3642	36.2684	35.0922	35.3284	34.5682	21.7368	25.4151	31.2811	36.4224	20.506	22.0551	20.6307	27.6487
628.4	26.0645	22.1473	22.4521	29.1321	22.2184	21.0208	24.1348	29.7725	27.4046	30.4543	27.4208	33.3241	36.3038	35.0214	35.3064	34.5328	21.5643	25.4488	31.1105	36.3679	20.4125	22.0858	20.6395	27.5021
628.85	26.0499	22.1334	22.4497	29.1544	22.238	20.9761	24.1727	29.7241	27.4272	30.4365	27.414	33.3231	36.2837	34.9956	35.2653	34.5261	21.6729	25.485	30.9661	36.3392	20.3316	22.1101	20.5501	27.3806
629.3	26.0186	22.1007	22.4502	29.1649	22.2427	20.9464	24.1721	29.7025	27.4553	30.4627	27.4202	33.3279	36.2493	34.9564	35.228	34.5041	21.8204	25.4947	31.012	36.3841	20.4112	22.0515	20.4562	27.4185
629.75	25.9923	22.051	22.4724	29.1648	22.2664	20.9832	24.1842	29.6667	27.3939	30.497	27.42	33.3489	36.2426	34.8799	35.1869	34.5031	22.0599	25.5465	31.1047	36.4654	20.4666	21.9837	20.3768	27.4234
630.2	25.9762	21.9953	22.5069	29.1571	22.2323	21.0326	24.1838	29.6676	27.3162	30.5467	27.4232	33.3604	36.2321	34.9306	35.1888	34.5108	22.2508	25.5703	31.1813	36.5467	20.5212	21.9395	20.276	27.5182
630.65	26.0035	21.9681	22.5304	29.1432	22.209	21.0961	24.1908	29.6565	27.2334	30.5785	27.4106	33.3365	36.256	34.9497	35.1993	34.4945	22.2804	25.5761	31.3538	36.6385	20.5678	21.9323	20.3435	27.6213
631.1	26.0406	21.9801	22.5304	29.211	22.1966	21.1505	24.1963	29.6525	27.1452	30.5832	27.3974	33.325	36.2952	34.9708	35.1936	34.483	22.3031	25.6115	31.3779	36.6184	20.585	21.9458	20.4466	27.651
631.55	26.0749	22.0051	22.5217	29.2803	22.1522	21.1544	24.1891	29.654	27.2077	30.5743	27.3952	33.3394	36.3411	35.0368	35.1477	34.5012	22.253	25.5306	31.3543	36.6433	20.5943	21.9613	20.5458	27.6725
632	26.0941	22.04	22.4859	29.3441	22.1343	21.164	24.186	29.621	27.2936	30.5087	27.4593	33.3461	36.3765	35.0444	35.0453	34.4878	22.2462	25.4838	31.3743	36.6299	20.6202	21.9886	20.6456	27.6482
632.45	26.0978	22.0482	22.4528	29.3879	22.1081	21.1638	24.189	29.6028	27.3689	30.4791	27.5227	33.3441	36.3191	35.0693	34.9086	34.484	22.2509	25.438	31.476	36.6366	20.6109	21.9891	20.6533	27.6236
632.9	26.1205	22.029	22.4403	29.3078	22.0832	21.1459	24.191	29.5795	27.4282	30.4536	27.5667	33.2227	36.2885	35.1276	34.8091	34.4993	22.2418	25.3812	31.6475	36.8039	20.5759	22.0264	20.6214	27.5992
633.35	26.1418	22	22.4264	29.2332	22.1073	21.1588	24.1979	29.5583	27.3916	30.5228	27.5917	33.0496	36.2082	35.1639	34.8235	34.442	22.2428	25.3983	31.8246	36.847	20.5836	22.0827	20.6079	27.5944
633.8	26.1844	21.9804	22.4245	29.1654	22.1356	21.1525	24.1852	29.5518	27.3487	30.6608	27.4966	32.8976	36.0361	35.205	34.877	34.4075	22.2387	25.3843	31.9404	36.8852	20.5914	22.0902	20.6042	27.5839
634.25	26.2006	21.9842	22.4224	29.1161	22.1744	21.1415	24.1316	29.5385	27.3064	30.7399	27.415	32.7847	35.9576	35.2117	34.9975	34.3578	22.218	25.3835	31.6879	36.8623	20.6589	22.0664	20.6024	27.5817
634.7	26.1691	21.9962	22.4212	29.1059	22.1959	21.1351	24.0677	29.5266	27.2824	30.8159	27.328	32.8794	35.8362	35.1611	35.1142	34.31	22.1979	25.3736	31.3829	36.7341	20.7599	22.048	20.6342	27.6326
635.15	26.0563	22.0126	22.4281	29.0784	22.1654	21.0308	23.9918	29.5154	27.2784	30.7305	27.2672	32.998	35.8199	35.1209	35.1525	34.2956	22.2348	25.3644	31.1074	36.6251	20.8185	22.0265	20.643	27.6867
635.6	25.936	22.0275	22.4296	29.0505	22.1461	20.9375	23.9622	29.5513	27.2756	30.6406	27.273	33.0965	35.9968	35.0654	35.1898	34.288	22.2798	25.3729	30.8999	36.5515	20.8122	22.0432	20.6453	27.7688
636.05	25.8412	22.0383	22.4114	29.0199	22.1332	20.8446	24.0039	29.5894	27.2767	30.579	27.2862	33.1797	36.1575	35.0234	35.1754	34.2928	22.3411	25.3781	30.9592	36.4941	20.8526	22.1456	20.673	27.8168
636.5	25.7803	22.05	22.3879	29.009	22.2106	20.7817	24.0538	29.6278	27.2841	30.5311	27.3062	33.1749	36.2885	34.9975	35.1419	34.267	22.4041	25.3997	31.0864	36.4358	20.838	22.2028	20.6869	27.8045
636.95	25.8552	22.069	22.3588	29.0304	22.3238	20.866	24.1141	29.6859	27.3202	30.5452	27.2953	33.1797	36.3306	34.9249	35.1458	34.244	22.4383	25.4081	31.1792	36.4243	20.8751	22.2282	20.7173	27.7725
637.4	25.9255	22.0511	22.3294	29.0551	22.4231	20.9584	24.1396	29.6874	27.3426	30.5458	27.2677	33.1825	36.2809	34.7728	35.1199	34.1962	22.4176	25.4151	31.2824	36.3803	20.9671	22.2238	20.7441	27.7111
637.85	26.0112	22.0956	22.3235	29.0693	22.5067	21.0551	24.1189	29.6651	27.3497	30.5473	27.2396	33.1711	36.2933	34.6303	35.1018	34.1417	22.3674	25.4325	31.3379	36.3516	20.9072	22.1749	20.7366	27.691
638.3	26.1002	22.1546	22.3211	29.0694	22.4419	21.1284	24.1014	29.6406	27.3624	30.5316	27.2363	33.1529	36.3707	34.4898	35.0989	34.0958	22.3547	25.4049	31.4077	36.364	20.8495	22.1355	20.7428	27.691
638.75	26.1236	22.2213	22.3318	29.0488	22.3746	21.1358	24.0785	29.592	27.3246	30.5514	27.2494	33.1089	36.4348	34.4257	35.0635	34.0327	22.2877	25.394	31.4938	36.3908	20.7801	22.1367	20.7385	27.7138
639.2	26.1403	22.3243	22.3478	29.0144	22.3108	21.1147	24.0738	29.5611	27.3023	30.5598	27.2658	33.0764	36.4597	34.5347	35.0616	33.9868	22.2577	25.3454	31.4536	36.4769	20.74	22.1653	20.717	27.7493
639.65	26.1616	22.2929	22.3559	28.9874	22.2621	21.0963	24.078	29.5702	27.3289	30.5743	27.2815	33.0477	36.4578	34.6313	35.052	33.9399	22.2817	25.3351	31.3582	36.5706	20.7843	22.1925	20.7494	27.7599
640.1	26.1489	22.2274	22.3562	28.9712	22.2604	21.0771	24.0692	29.5632	27.3201	30.6064	27.2783	33.0056	36.3784	34.7508	35.0348	33.8997	22.2664	25.3834	31.3048	36.6729	20.8492	22.2123	20.7776	27.7588
640.55	26.145	22.1367	22.3498	28.9462	22.2222	21.0505	24.0828	29.5508	27.3196	30.6252	27.2664	32.975	36.2656	34.8283	35.0186	33.9064	22.2939	25.496	31.2457	36.7294	20.8938	22.2007	20.7919	27.7146
641	26.1413	22.0312	22.3398	28.9319	22.1842	21.0515	24.074	29.5254	27.3172	30.6632	27.2882	32.933	36.1518	34.8273	35.0912	33.9036	22.331	25.6804	31.2202	36.6815	20.8712	22.1773	20.8308	27.6837
641.45	26.0851	22.0034	22.3256	28.9294	22.1522	21.0567	24.0728	29.4782	27.2847	30.69	27.2909	32.8995	35.9643	34.8398	35.2031	33.9217	22.3285	25.7511	31.3033	36.4817	20.8409	22.1567	20.7961	27.6638
641.9	26.0638	21.9961	22.3023	28.9211	22.1575	21.07	24.0936	29.4503	27.282	30.6815	27.3775	32.8861	35.8343	34.8283	35.2921	33.9313	22.3474	25.8138	31.241	36.2302	20.8283	22.1702	20.7348	27.6332
642.35	26.021	21.9989	22.2601	28.9394	22.2131	21.1054	24.0593	29.4124	27.3076	30.5724	27.4811	32.888	35.8544	34.813	35.3791	33.9714	22.3663	25.7214	31.1635	36.0093	20.8937	22.1968	20.7004	27.6416
642.8	25.9821	21.9978	22.2308	28.955	22.2462	21.1264	24.0503	29.3443	27.3034	30.435	27.5248	32.8985	35.9299	34.8235	35.2586	34.0432	22.3413	25.5797	31.1574	35.907	21.0117	22.1917	20.6723	27.6078
643.25	25.9743	21.9641	22.2417	28.9591	22.2712	21.1835	24.0103	29.2652	27.2916	30.2947	27.5905	32.9043	36.0839	34.8302	35.1075	34.069	22.3474	25.4943	31.1086	36.1116	21.1243	22.1849	20.6555	27.5797
643.7	25.9665	21.9365	22.2661	28.9687	22.2703	21.2437	23.9406	29.1639	27.2873	30.2166	27.4939	32.8842	36.2206	34.8541	34.9612	34.1139	22.3413	25.3898	31.1267	36.3574	21.231	22.1436	20.6671	27.5617
644.15	25.9926	21.9594	22.3121	28.9597	22.2642	21.2603	23.9377	29.113	27.2586	30.2958	27.3829	32.8899	36.2531	34.901	34.8331	34.0384	22.322	25.3783	31.1801	36.6242	21.1741	22.0968	20.6668	27.5372
644.6	26.0266	21.9859	22.3505	28.9517	22.2797	21.2819	23.9279	29.1565	27.2689	30.3996	27.2878	32.9119	36.2474	34.9277	34.8053	33.9169	22.3645	25.3774	31.2365	36.8307	21.1196	22.1281	20.6412	27.5566
645.05	26.0592	22.0299	22.3429	28.9314	22.3277	21.2234	23.943	29.2102	27.2934	30.5159	27.1676	32.953	36.1183	34.9507	34.7852	33.8338	22.3728	25.3794	31.27	36.8843	21.0769	22.1541	20.6461	27.588
645.5	26.0663	22.0613	22.3462	28.9069	22.4117	21.1482	23.976	29.2927	27.2959	30.5727	27.1331	33.0382	36.0217	34.9086	34.8082	33.7324	22.3954	25.3584	31.2958	36.9722	20.9879	22.189	20.6142	27.6318
645.95	26.0631	22.0306	22.3339	28.8797	22.4546	21.1123	23.9532	29.3241	27.322	30.5657	27.1126	33.0493	36.0007	34.7527	34.8178	33.6817	22.4383	25.3483	31.3006	37.0755	21.0078	22.2366	20.5801	27.6479
646.4	26.1376	22.0678	22.2954	28.8454	22.4915	21.0874	23.9103	29.2984	27.3312	30.5465	27.1191	33.051	36.0198	34.5557	34.8216	33.6731	22.3923	25.3577	31.2509	37.1759	20.9585	22.2703	20.5694	27.6561
646.85	26.2069	22.1264	22.2713	28.8335	22.4575	21.0964	23.8836	29.2921	27.3539	30.5103	27.1465	33.0143	36.1393	34.3654	34.7996	33.6463	22.4426	25.3527	31.2107	37.2218	20.8948	22.316	20.5576	27.6233
647.3	26.3113	22.1913	22.2481	28.8095	22.3809	21.1339	23.8658	29.2847	27.369	30.4744	27.1603	32.9548	36.2455	34.2861	34.7422	33.6253	22.4647	25.3706	31.1648	37.1434	20.8866	22.3531	20.5843	27.5647
647.75	26.3994	22.2556	22.2763	28.7962	22.3062	21.1501	23.8779	29.3131	27.3368	30.4522	27.1602	32.9417	36.3009	34.3922	34.7021	33.6263	22.4534	25.3445	31.138	36.9378	20.8595	22.3633	20.5956	27.5626
648.2	26.3288	22.2169	22.3341	28.7925	22.2482	21.1542	23.9185	29.3511	27.309	30.4337	27.144	32.8913	36.3918	34.5424	34.6781	33.6081	22.5482	25.3284	31.1323	36.714	20.9019	22.307	20.5723	27.5778
648.65	26.2823	22.1494	22.3936	28.7815	22.2126	21.1562	23.9241	29.3739	27.2358	30.4148	27.1227	32.8246	36.5171	34.7021	34.6992	33.6024	22.4959	25.3323	31.2203	36.6088	20.9421	22.2403	20.5476	27.6119
649.1	26.2067	22.0704	22.4383	28.8056	22.1989	21.1052	23.9102	29.3818	27.2052	30.442	27.1234	32.7436	36.5821	34.7881	34.7585	33.5918	22.4796	25.3535	31.3197	36.5371	20.908	22.2211	20.5148	27.6788
649.55	26.1383	22.0228	22.4029	28.8076	22.219	21.0884	23.8909	29.3561	27.2609	30.4774	27.1298	32.6422	36.5457	34.7824	34.7785	33.5641	22.4956	25.2821	31.5263	36.7934	20.8748	22.2054	20.5078	27.7186
650	26.1536	22.0068	22.3308	28.8045	22.2243	21.0561	23.8663	29.342	27.3153	30.5217	27.1345	32.5896	36.4492	34.7575	34.7766	33.5373	22.479	25.1551	31.7701	37.1357	20.8216	22.2217	20.5756	27.7373
650.45	26.1451	21.9803	22.2437	28.809	22.2643	21.0783	23.8631	29.3275	27.3764	30.5608	27.1337	32.6021	36.2856	34.7011	34.7307	33.5153	22.5268	25.0201	31.8658	37.3624	20.782	22.2246	20.6414	27.7526
650.9	26.1453	21.9567	22.1508	28.7828	22.3085	21.1656	23.8511	29.289	27.4024	30.5052	27.1099	32.6375	36.1766	34.6714	34.6628	33.5019	22.5542	24.8772	31.9786	37.6598	20.7406	22.1702	20.7021	27.7583
651.35	26.1405	21.9174	22.1037	28.7945	22.3298	21.2089	23.8486	29.2856	27.3598	30.3968	27.0957	32.6901	36.2397	34.6724	34.6514	33.5096	22.5873	24.9813	31.8705	37.5221	20.7093	22.2293	20.7619	27.7409
651.8	26.1216	21.888	22.1438	28.8038	22.3442	21.2707	23.819	29.2457	27.3275	30.2563	27.1908	32.7283	36.2302	34.6848	34.6705	33.5211	22.5818	25.1313	31.7271	37.2964	20.6678	22.3043	20.7411	27.6986
652.25	26.1014	21.8921	22.1745	28.7912	22.3124	21.2346	23.7777	29.1939	27.3417	30.1696	27.3003	32.7369	36.2273	34.7288	34.7116	33.6052	22.567	25.3139	31.6611	37.0803	20.6275	22.4061	20.7652	27.6808
652.7	26.087	21.9245	22.2106	28.7836	22.2303	21.1547	23.7892	29.1957	27.3456	30.227	27.4209	32.7102	36.256	34.7613	34.724	33.6989	22.5403	25.4836	31.5645	36.8364	20.7173	22.5354	20.7811	27.6481
653.15	26.0952	21.9595	22.2516	28.7484	22.1656	21.092	23.7896	29.1772	27.3737	30.3083	27.5226	32.6853	36.2034	34.7786	34.7231	33.7597	22.5132	25.5211	31.4871	36.7762	20.7842	22.4839	20.8014	27.6452
653.6	26.0965	21.9704	22.2261	28.7119	22.1353	21.0338	23.8099	29.1773	27.4067	30.4551	27.43	32.669	36.2359	34.7786	34.7059	33.7967	22.5278	25.5386	31.4297	36.7188	20.8399	22.4193	20.8562	27.6763
654.05	26.0894	21.9679	22.2409	28.6784	22.1379	21.034	23.8446	29.1867	27.4013	30.5555	27.3177	32.6528	36.2646	34.747	34.702	33.6624	22.5486	25.5343	31.3417	36.6949	20.893	22.3417	20.8192	27.6574
654.5	26.0775	21.9193	22.2485	28.6792	22.2207	21.0556	23.8387	29.1752	27.4121	30.5599	27.2029	32.6671	36.2445	34.6801	34.6963	33.5157	22.5646	25.5415	31.2748	36.6442	20.8774	22.2659	20.7918	27.6582
654.95	26.0508	21.8589	22.2532	28.6896	22.2961	21.0791	23.8316	29.1627	27.4136	30.582	27.0991	32.6356	36.2512	34.6169	34.6447	33.3851	22.5542	25.5511	31.3073	36.6184	20.8951	22.2735	20.7515	27.728
655.4	26.0325	21.8449	22.2806	28.7076	22.3137	21.0921	23.8309	29.1541	27.407	30.5317	27.0842	32.6021	36.2541	34.571	34.5978	33.2726	22.52	25.5479	31.2738	36.6614	20.9659	22.2885	20.7212	27.7685
655.85	26.0284	21.8411	22.298	28.7421	22.3389	21.0979	23.8343	29.1562	27.4033	30.5	27.0903	32.5629	36.2847	34.5691	34.5366	33.2319	22.4876	25.5203	31.2623	36.7265	21.0351	22.3021	20.7371	27.8398
656.3	26.0244	21.8839	22.3374	28.7331	22.3213	21.0818	23.8433	29.1586	27.3795	30.5212	27.0989	32.5868	36.2837	34.6475	34.5127	33.1723	22.461	25.5025	31.2375	36.8718	21.0789	22.3063	20.7677	27.8769
656.75	26.0151	21.9402	22.3499	28.721	22.2939	21.0621	23.8535	29.1857	27.3399	30.4987	27.0997	32.6709	36.3095	34.6772	34.5309	33.1334	22.4657	25.4572	31.183	36.9846	21.0847	22.3159	20.7918	27.7732
657.2	26.0379	21.9684	22.3337	28.7088	22.3084	21.0621	23.8401	29.222	27.2732	30.5063	27.0889	32.7157	36.3325	34.6896	34.5357	33.0964	22.4636	25.4569	31.1619	37.0631	21.0494	22.3133	20.7925	27.6879
657.65	26.0748	21.9868	22.299	28.6942	22.3062	21.1231	23.8068	29.2531	27.1952	30.5166	27.0757	32.7595	36.3478	34.6676	34.549	33.0775	22.5164	25.4664	31.1199	37.0525	20.9955	22.3334	20.7862	27.606
658.1	26.1163	21.9768	22.2468	28.691	22.3251	21.2028	23.7642	29.2716	27.1716	30.4742	27.0557	32.6694	36.4865	34.5997	34.5433	33.083	22.6026	25.4802	31.1792	36.8967	20.9652	22.3629	20.7572	27.5925
658.55	26.1728	21.9619	22.1944	28.6921	22.3459	21.2786	23.7332	29.2655	27.1751	30.4795	27.0422	32.5459	36.5438	34.594	34.529	33.0722	22.6455	25.5315	31.2738	36.6614	20.9794	22.3772	20.7418	27.599
659	26.2064	21.9583	22.1648	28.6833	22.357	21.3347	23.7384	29.2374	27.2034	30.4739	27.0685	32.4552	36.5754	34.6256	34.528	33.0681	22.7067	25.6309	31.3762	36.3956	20.9846	22.3914	20.7179	27.6087
659.45	26.2364	21.9301	22.1545	28.6717	22.3599	21.26	23.7638	29.2705	27.266	30.436	27.0875	32.3732	36.5964	34.6781	34.484	33.0907	22.6779	25.7632	31.4861	36.2627	21.0218	22.3663	20.7009	27.6117
659.9	26.2333	21.9185	22.1599	28.661	22.3533	21.179	23.8042	29.3157	27.2944	30.4276	27.1214	32.3753	36.5075	34.7355	34.3769	33.1137	22.6514	25.8531	31.4785	36.3048	21.0692	22.338	20.7144	27.5574
660.35	26.195	21.9056	22.1968	28.6354	22.3556	21.1004	23.8381	29.3508	27.3153	30.4775	27.1138	32.4175	36.4291	34.7499	34.2583	33.1328	22.6733	25.9108	31.5215	36.5103	21.0795	22.3337	20.7005	27.5976
660.8	26.1445	21.8833	22.2328	28.6249	22.3388	21.0357	23.8587	29.3991	27.3247	30.5626	27.057	32.4711	36.3908	34.7594	34.1512	33.1226	22.6864	25.8074	31.5989	36.7446	21.0774	22.3595	20.6835	27.6332
661.25	26.0826	21.8369	22.2581	28.6049	22.351	21.0262	23.8544	29.3259	27.325	30.679	26.98	32.5342	36.3497	34.7441	34.1149	33.1095	22.7436	25.665	31.6439	36.89	21.0658	22.4031	20.6564	27.6732
661.7	26.0616	21.7702	22.2826	28.5828	22.3314	21.0244	23.843	29.2368	27.3345	30.7842	26.8951	32.5686	36.3468	34.7441	34.2364	33.0868	22.7551	25.579	31.6611	36.9541	21.0424	22.4303	20.5662	27.7121
662.15	26.0729	21.7143	22.2917	28.5808	22.3103	21.0221	23.8178	29.1743	27.32	30.7398	26.9044	32.5591	36.3803	34.7489	34.3616	33.154	22.7112	25.5268	31.5712	36.9751	21.0279	22.4273	20.5006	27.6675
662.6	26.0746	21.6604	22.2946	28.5766	22.3327	21.0033	23.7807	29.1105	27.3187	30.6762	26.9413	32.5151	36.3669	34.7977	34.463	33.2566	22.6702	25.5655	31.4651	36.955	21.038	22.3852	20.4728	27.6467
663.05	26.0708	21.7274	22.3115	28.602	22.3064	21.0092	23.7473	29.0893	27.3123	30.5967	26.9948	32.451	36.3688	34.8551	34.5261	33.304	22.6432	25.6522	31.4048	36.9483	21.0592	22.3392	20.4572	27.6332
663.5	26.0552	21.8075	22.3073	28.6222	22.3109	20.9985	23.7257	29.0929	27.3164	30.53	27.0444	32.4099	36.3784	34.8924	34.4812	33.3485	22.6626	25.69	31.4452	36.9397	21.0777	22.3081	20.4941	27.6507
663.95	26.031	21.8848	22.3083	28.6379	22.325	21.0112	23.7144	29.0717	27.3715	30.5342	27.0415	32.3774	36.3841	34.9507	34.4343	33.2097	22.7164	25.7109	31.4989	36.9263	21.1607	22.2956	20.5372	27.6831
664.4	26.024	21.9649	22.3164	28.6441	22.3022	21.0253	23.7074	29.0451	27.4196	30.5121	27.0257	32.3621	36.4396	34.8532	34.3922	33.0551	22.7833	25.7395	31.5047	36.9866	21.2684	22.2927	20.5793	27.6877
664.85	26.0277	21.9773	22.3019	28.6146	22.3086	21.0158	23.7314	29.0316	27.46	30.5007	27.0217	32.3726	36.4377	34.7766	34.3616	32.9153	22.8019	25.7197	31.5611	37.0258	21.3415	22.3162	20.6467	27.6943
665.3	26.0536	21.9761	22.2974	28.5935	22.3129	21.0271	23.7459	28.9967	27.4649	30.474	27.0217	32.3659	36.4492	34.6848	34.3521	32.805	22.7699	25.6969	31.6133	37.1291	21.4156	22.3418	20.6952	27.6795
665.75	26.0976	21.9694	22.3	28.5644	22.3058	21.0072	23.7556	28.9876	27.4336	30.4773	27.0124	32.3764	36.4702	34.593	34.3511	32.7718	22.7418	25.716	31.678	37.195	21.3582	22.3418	20.7289	27.6849
666.2	26.1618	21.9448	22.2846	28.5563	22.3205	20.9877	23.7631	28.9722	27.3704	30.5432	27.0256	32.3645	36.4329	34.6131	34.3549	32.7851	22.6767	25.725	31.7937	37.2888	21.2734	22.3632	20.7477	27.6751
666.65	26.2042	21.9142	22.2698	28.5646	22.3606	20.9933	23.755	28.9584	27.2632	30.6199	27.0194	32.2265	36.4951	34.6208	34.3549	32.8298	22.5487	25.7874	31.7277	37.4905	21.2277	22.3533	20.7064	27.6344
667.1	26.2048	21.9067	22.2413	28.5863	22.407	20.9871	23.7584	28.9846	27.1724	30.7135	27.0046	32.0692	36.4979	34.6523	34.3415	32.8285	22.4515	25.8918	31.5223	37.5412	21.1746	22.3232	20.676	27.5798
667.55	26.1729	21.895	22.2052	28.615	22.4428	20.9851	23.7841	28.9861	27.08	30.7592	26.9968	31.9025	36.4855	34.6753	34.3291	32.8725	22.346	25.8785	31.3283	37.5584	21.2152	22.3398	20.6557	27.5358
668	26.1165	21.8716	22.1811	28.6193	22.4727	20.9837	23.8685	29.0132	27.0659	30.7859	26.9516	31.7841	36.5649	34.6418	34.3081	32.8319	22.2725	25.8539	31.1084	37.4446	21.3043	22.3406	20.6272	27.5585
668.45	26.0806	21.8571	22.172	28.6234	22.4571	20.9616	23.9283	29.06	27.1587	30.7653	26.9222	31.8697	36.5926	34.6198	34.2947	32.7752	22.388	25.7577	31.094	37.2304	21.3749	22.3317	20.6379	27.5944
668.9	26.067	21.8447	22.1237	28.6088	22.4234	20.9483	23.9608	29.0511	27.2518	30.8272	26.8848	31.9887	36.6376	34.6064	34.2985	32.7554	22.5079	25.634	31.2346	37.1004	21.4459	22.3451	20.6544	27.6765
669.35	26.0865	21.8386	22.0684	28.5843	22.3901	20.9475	23.9648	29.0412	27.3747	30.9076	26.8652	32.125	36.6787	34.572	34.3817	32.6904	22.6271	25.6565	31.3237	37.0449	21.475	22.316	20.6671	27.7333
669.8	26.0859	21.8915	22.0285	28.5569	22.3815	20.9663	23.8627	29.0065	27.4541	30.9429	26.8734	32.2395	36.6404	34.5882	34.4831	32.6717	22.738	25.6795	31.4827	37.0401	21.4286	22.2944	20.6913	27.7057
670.25	26.0816	21.927	21.9807	28.5383	22.4094	20.9918	23.793	28.9482	27.458	31.0116	26.8572	32.2541	36.584	34.6236	34.5309	32.6389	22.7633	25.738	31.5708	37.0573	21.3653	22.2994	20.6942	27.7064
670.7	26.1145	21.9204	22.0605	28.5247	22.4515	21.0031	23.745	28.9038	27.4658	30.8844	26.7945	32.2431	36.5496	34.6294	34.5644	32.5699	22.7907	25.7901	31.5768	37.0717	21.2696	22.3085	20.6665	27.6617
671.15	26.121	21.9038	22.1359	28.5205	22.5208	21.0184	23.7298	28.888	27.4424	30.7796	26.6979	32.1891	36.4989	34.7814	34.4324	32.5499	22.8245	25.7534	31.6665	37.0439	21.192	22.342	20.6407	27.6293
671.6	26.1769	21.8772	22.1908	28.535	22.5377	21.0273	23.758	28.8802	27.4119	30.6971	26.5963	32.1361	36.4453	34.9277	34.2937	32.5182	22.8707	25.723	31.6921	37.0392	21.1556	22.3483	20.61	27.6516
672.05	26.2322	21.8743	22.2567	28.5292	22.5196	20.9982	23.7578	28.8645	27.4031	30.6078	26.5198	32.1006	36.4272	34.9966	34.2105	32.5838	22.8733	25.6787	31.7015	37.0516	21.1495	22.3755	20.6032	27.6208
672.5	26.2066	21.8868	22.2516	28.5371	22.4947	20.9794	23.7453	28.8562	27.4022	30.6101	26.5658	32.0933	36.4186	35.0922	34.1579	32.6761	22.8584	25.6492	31.7424	37.0459	21.0868	22.3838	20.6325	27.6294
672.95	26.194	21.9164	22.2616	28.5401	22.4668	20.956	23.6934	28.8302	27.402	30.5741	26.6211	32.1155	36.4434	34.9698	34.1857	32.6999	22.8118	25.663	31.8696	37.0889	21.0195	22.3871	20.6609	27.6412
673.4	26.147	21.9045	22.2825	28.5245	22.4574	20.9108	23.6465	28.8001	27.4273	30.5244	26.6791	32.1256	36.4626	34.8321	34.221	32.7314	22.7394	25.6618	31.9642	37.1147	20.9268	22.4094	20.6901	27.6169
673.85	26.1028	21.8805	22.2811	28.5083	22.4709	20.9446	23.6213	28.7846	27.4624	30.4753	26.7379	32.1423	36.3927	34.7422	34.244	32.6027	22.6886	25.6871	32.1	37.153	20.8008	22.383	20.7054	27.6235
674.3	26.1085	21.9139	22.2659	28.4802	22.4893	20.9763	23.6049	28.7855	27.4776	30.4382	26.7477	32.1371	36.2579	34.6313	34.222	32.4753	22.6325	25.7089	32.2445	37.2342	20.9155	22.3531	20.6969	27.5923
674.75	26.1123	21.9407	22.2339	28.4444	22.4913	20.9925	23.6055	28.7804	27.4768	30.4306	26.7873	32.1237	36.0504	34.5835	34.2143	32.3952	22.6176	25.6924	32.1825	37.2696	21.0342	22.3076	20.6915	27.5296
675.2	26.1379	21.9844	22.1944	28.4341	22.5077	21.0354	23.604	28.7844	27.4516	30.444	26.826	32.1479	35.9442	34.5596	34.2019	32.3028	22.6458	25.7172	32.1749	37.1558	21.166	22.2903	20.7036	27.4819
675.65	26.1588	22.0262	22.1697	28.4459	22.5095	21.0258	23.6026	28.7319	27.4229	30.4831	26.8642	32.1444	35.9863	34.5309	34.1847	32.301	22.7146	25.723	32.0736	36.9808	21.3147	22.2957	20.7273	27.4617
676.1	26.1637	22.0045	22.1649	28.4609	22.4971	20.9914	23.6011	28.6626	27.3701	30.5108	26.8832	32.1452	36.1039	34.5108	34.2086	32.2771	22.7483	25.7111	31.9655	36.8001	21.3077	22.3271	20.7665	27.458
676.55	26.1519	21.9875	22.1765	28.4942	22.4835	20.9637	23.633	28.5979	27.3334	30.5429	26.8642	32.1486	36.3507	34.5328	34.1904	32.247	22.6842	25.7759	31.9013	36.649	21.336	22.3709	20.8024	27.5121
677	26.1201	21.982	22.1839	28.5081	22.4547	20.9152	23.6774	28.5345	27.2832	30.5715	26.83	32.1206	36.5228	34.5357	34.1503	32.2521	22.5817	25.782	31.8343	36.8125	21.3666	22.3213	20.8088	27.6023
677.45	26.1432	21.9758	22.2217	28.4936	22.4508	20.8925	23.6977	28.5845	27.2179	30.6135	26.7875	32.054	36.6519	34.5548	34.1216	32.244	22.4226	25.8731	31.8839	36.9923	21.4233	22.2948	20.7987	27.6652
677.9	26.1742	21.9858	22.2503	28.4543	22.4491	20.9085	23.7102	28.6372	27.2346	30.6656	26.7711	31.9162	36.7437	34.571	34.0527	32.2836	22.3344	26.0119	31.926	37.1692	21.4868	22.2383	20.7889	27.7472
678.35	26.2326	21.9917	22.2762	28.4103	22.4665	20.9311	23.6592	28.6919	27.3027	30.6896	26.7541	31.7824	36.7466	34.5605	33.9542	32.325	22.4022	26.0445	32.0264	37.3299	21.4956	22.2005	20.7677	27.7086
678.8	26.3049	21.9767	22.3059	28.3692	22.5111	20.9544	23.5947	28.7517	27.3886	30.682	26.737	31.6566	36.7513	34.5882	33.8644	32.3219	22.4742	26.1056	32.1172	37.3471	21.4962	22.2895	20.7688	27.6303
679.25	26.3074	21.9603	22.2754	28.3383	22.567	20.9211	23.551	28.7455	27.479	30.5849	26.7538	31.6105	36.7007	34.5672	33.763	32.3156	22.5984	26.0189	32.1631	37.3844	21.4388	22.3352	20.7677	27.5465
679.7	26.305	21.9322	22.255	28.3369	22.6443	20.8096	23.5189	28.7371	27.4968	30.5031	26.7516	31.7212	36.6433	34.6389	33.6865	32.2652	22.7202	25.9218	32.1316	37.3748	21.39	22.4194	20.7429	27.427
680.15	26.2918	21.8884	22.2355	28.3474	22.6788	20.697	23.5194	28.7327	27.4451	30.4263	26.8432	31.8257	36.6222	34.7326	33.7458	32.1935	22.789	25.8725	32.102	37.3528	21.3576	22.4608	20.731	27.4962
680.6	26.2766	21.8499	22.2167	28.3699	22.6772	20.6015	23.5364	28.7183	27.3895	30.401	26.9711	31.9183	36.5974	34.769	33.8089	32.1351	22.8648	25.8571	32.0656	37.3289	21.3433	22.4447	20.6978	27.5537
681.05	26.2692	21.8191	22.2336	28.4171	22.6379	20.5946	23.5539	28.7077	27.3262	30.4372	27.0484	31.9821	36.5907	34.8608	33.8644	32.1093	22.8772	25.9033	31.9375	37.284	21.4102	22.4469	20.674	27.608
681.5	26.2631	21.8182	22.2411	28.4644	22.589	20.7156	23.5599	28.7037	27.3008	30.472	27.1105	31.9533	36.6203	34.7843	33.9294	32.1052	22.8946	25.9263	31.9126	37.2744	21.4675	22.4113	20.6725	27.6833
681.95	26.2175	21.847	22.2357	28.4791	22.58	20.8398	23.5675	28.7034	27.3305	30.5231	27.0365	31.9177	36.5639	34.7135	33.9256	32.1826	22.8977	25.9465	31.6573	37.3194	21.5426	22.4127	20.6742	27.5674
682.4	26.1683	21.891	22.2215	28.5388	22.5938	20.9423	23.5653	28.6947	27.3576	30.5489	26.9288	31.8758	36.3679	34.6667	33.9284	32.2854	22.8903	25.9076	31.4134	37.3566	21.6017	22.3964	20.6948	27.4962
682.85	26.1238	21.851	22.2086	28.5741	22.6032	20.9925	23.571	28.6929	27.3935	30.5664	26.8292	31.8292	36.1623	34.594	33.9466	32.336	22.9625	25.869	31.2643	37.4159	21.5797	22.3972	20.7264	27.4478
683.3	26.0749	21.7965	22.1853	28.6026	22.6058	20.9826	23.5801	28.6861	27.4096	30.5672	26.7518	31.7952	35.9567	34.6102	33.9495	32.374	22.9898	25.8233	31.1792	37.4092	21.5296	22.4388	20.744	27.3998
683.75	26.0946	21.7146	22.1675	28.6459	22.5873	20.9611	23.5616	28.651	27.3931	30.5723	26.7464	31.7531	35.8869	34.6102	33.9504	32.2959	22.9773	25.7609	31.4957	37.2381	21.4524	22.4845	20.7557	27.4991
684.2	26.1091	21.6301	22.164	28.577	22.552	20.955	23.5467	28.628	27.395	30.5776	26.7601	31.731	36.0953	34.5978	33.9466	32.1756	22.9837	25.7654	31.7548	37.0382	21.387	22.548	20.7614	27.5502
684.65	26.1124	21.697	22.1551	28.5248	22.5307	20.9442	23.4969	28.5997	27.378	30.5878	26.7717	31.7112	36.3421	34.6026	33.9456	32.0915	22.9561	25.7585	32.0427	36.8125	21.3566	22.5841	20.751	27.5662
685.1	26.1411	21.7451	22.1626	28.4511	22.5283	20.9298	23.451	28.5647	27.4162	30.6337	26.7809	31.6767	36.5582	34.6026	33.9495	32.0072	22.9513	25.7571	32.1459	36.7322	21.3769	22.5733	20.7366	27.5787
685.55	26.14	21.8154	22.1886	28.3688	22.5444	20.9259	23.4495	28.5801	27.4575	30.6565	26.7791	31.6817	36.6911	34.6217	33.9456	31.9637	22.9982	25.7993	32.0647	36.8546	21.4402	22.5017	20.7248	27.586
686	26.1377	21.8951	22.2284	28.3405	22.5677	20.9166	23.4424	28.5894	27.5483	30.659	26.7797	31.6772	36.7131	34.6619	33.9428	31.9491	22.994	25.7362	32.0408	36.9923	21.5041	22.4302	20.7007	27.6251
686.45	26.14	21.9039	22.24	28.3027	22.5817	20.9113	23.4708	28.5992	27.6742	30.6218	26.7932	31.6693	36.7312	34.6887	33.9141	31.9045	22.8531	25.75	31.926	37.1654	21.5875	22.3631	20.702	27.6862
686.9	26.0999	21.9423	22.2454	28.2965	22.5458	20.9192	23.506	28.6314	27.693	30.5096	26.794	31.6782	36.7245	34.6695	33.9083	31.8639	22.704	25.7865	31.9107	37.2572	21.6492	22.3306	20.7158	27.77
687.35	26.0606	21.9606	22.227	28.314	22.4947	20.9208	23.5178	28.6322	27.7047	30.4113	26.7793	31.6763	36.7446	34.6542	33.9141	31.8383	22.5313	25.7869	31.8552	37.2677	21.6491	22.3126	20.7138	27.7663
687.8	26.0267	21.9553	22.1928	28.3402	22.4737	20.9229	23.5197	28.62	27.5939	30.3598	26.7606	31.6872	36.7485	34.5863	34.0164	31.7915	22.4219	25.9331	31.7854	37.3127	21.6462	22.2773	20.7832	27.7813
688.25	25.9275	21.9554	22.1794	28.3564	22.4877	20.9456	23.5111	28.5986	27.4757	30.3903	26.7587	31.696	36.6901	34.5863	34.1579	31.7595	22.5529	25.9757	31.7579	37.3624	21.6407	22.242	20.8296	27.8255
688.7	25.8608	21.9269	22.1736	28.3682	22.5461	20.9429	23.5002	28.5652	27.4243	30.4629	26.7446	31.6708	36.6758	34.6877	34.2335	31.738	22.6922	25.9753	31.8202	37.3987	21.6571	22.1737	20.8967	27.827
689.15	25.7888	21.9224	22.1842	28.3733	22.6006	20.9473	23.4986	28.5259	27.3934	30.5441	26.6823	31.6385	36.6433	34.7231	34.2851	31.7167	22.8593	26.0247	31.8998	37.4379	21.7129	22.1873	20.9865	27.8745
689.6	25.7268	21.9011	22.1895	28.3694	22.6026	20.9699	23.523	28.5078	27.4384	30.5938	26.5922	31.6001	36.5878	34.8139	34.1512	31.7317	23.0213	25.9933	32.0233	37.4179	21.7659	22.2132	20.9723	27.87
690.05	25.8438	21.8775	22.2256	28.368	22.5688	20.9727	23.5261	28.5094	27.4567	30.5944	26.4916	31.5557	36.5859	34.7632	33.9877	31.7468	23.0538	26.0244	32.2039	37.3557	21.7894	22.2615	20.9523	27.8087
690.5	25.9614	21.8832	22.241	28.3609	22.5345	20.9815	23.5141	28.5017	27.4834	30.608	26.444	31.5647	36.5735	34.6399	33.8691	31.7409	23.0722	26.0747	32.2467	37.3108	21.8096	22.347	20.8958	27.7554
690.95	26.0789	21.8573	22.2506	28.3249	22.5237	20.9862	23.4927	28.5123	27.499	30.6013	26.5177	31.5529	36.6423	34.5529	33.7592	31.7452	23.0583	26.0569	32.3709	37.2515	21.809	22.3873	20.8268	27.7053
691.4	26.1757	21.8837	22.279	28.2881	22.5358	20.9739	23.4472	28.5294	27.5104	30.6298	26.6044	31.5328	36.7207	34.484	33.7391	31.7357	23.0308	26.0193	32.4013	37.2534	21.7988	22.4375	20.7945	27.7171
691.85	26.1777	21.9039	22.2806	28.255	22.5899	20.9767	23.4235	28.5303	27.5617	30.6437	26.6803	31.5301	36.8365	34.4716	33.7219	31.8159	23.0381	25.957	32.3238	37.2763	21.7852	22.4721	20.7826	27.7318
692.3	26.1726	21.9297	22.2965	28.215	22.6338	20.987	23.3862	28.519	27.5851	30.6395	26.7206	31.5134	36.9655	34.4678	33.698	31.9013	23.0365	25.9289	32.2205	37.3519	21.7089	22.4728	20.7899	27.7587
692.75	26.2309	21.9758	22.2869	28.2259	22.649	21.0108	23.3279	28.4841	27.5876	30.6426	26.6986	31.512	36.9378	34.4898	33.6941	31.9402	23.0522	25.9141	31.97	37.4647	21.6531	22.4687	20.8067	27.7589
693.2	26.3066	22.0035	22.2406	28.2402	22.6605	21.0131	23.2827	28.4317	27.5507	30.6032	26.6937	31.5136	36.9034	34.44	33.6903	31.9611	23.0596	25.9295	31.8313	37.545	21.6101	22.4793	20.8228	27.6959
693.65	26.3817	22.0428	22.1818	28.258	22.6196	21.0038	23.2429	28.3842	27.4907	30.6208	26.6949	31.5242	36.8097	34.4104	33.7066	31.8274	23.0581	25.9525	31.7807	37.6454	21.597	22.4683	20.813	27.6858
694.1	26.4568	22.0449	22.1389	28.2802	22.5808	21.0219	23.2549	28.3952	27.439	30.6498	26.6964	31.5326	36.6911	34.3779	33.7152	31.7215	23.1031	25.9351	31.838	37.6311	21.5837	22.46	20.8206	27.6587
694.55	26.4261	22.0491	22.0728	28.2734	22.5631	21.0135	23.3034	28.4333	27.3949	30.6431	26.7004	31.5529	36.649	34.3157	33.7018	31.6715	23.1303	25.9518	31.9929	37.5948	21.5671	22.4453	20.8126	27.6385
695	26.3727	22.0328	22.0418	28.2693	22.5449	21.1082	23.3412	28.4699	27.3418	30.5575	26.6821	31.5738	36.6595	34.3119	33.6941	31.627	23.2033	26.0162	32.0685	37.5823	21.5375	22.3879	20.8341	27.6407
695.45	26.3119	21.9969	22.0256	28.2705	22.5559	21.2063	23.3838	28.5175	27.2913	30.4004	26.6456	31.5699	36.6586	34.2822	33.6827	31.6252	23.2511	26.0853	32.079	37.5575	21.4711	22.3916	20.8686	27.6179
695.9	26.2394	21.9913	21.9955	28.2686	22.5624	21.2381	23.3879	28.5105	27.2445	30.2242	26.61	31.5574	36.6672	34.2822	33.6865	31.5845	23.2294	26.1107	32.1039	37.5919	21.51	22.3598	20.8665	27.632
696.35	26.2105	21.9852	22.0618	28.2614	22.5798	21.2817	23.3892	28.4808	27.2463	30.1119	26.5933	31.5336	36.7007	34.3234	33.6702	31.5086	23.1094	26.036	32.1221	37.5929	21.5452	22.3408	20.8891	27.6611
696.8	26.1987	21.9903	22.1041	28.2544	22.6136	21.1771	23.405	28.4794	27.3438	30.1817	26.602	31.5122	36.6729	34.4678	33.5593	31.4514	22.9247	25.8428	32.1651	37.5642	21.5923	22.3713	20.8762	27.707
697.25	26.1881	22.0141	22.1501	28.2544	22.6303	21.0717	23.4005	28.463	27.4211	30.2729	26.616	31.4985	36.6385	34.6829	33.4197	31.4245	22.7654	25.6362	32.1985	37.4791	21.6947	22.3534	20.8698	27.736
697.7	26.1955	22.0114	22.1783	28.2535	22.6424	21.0182	23.3971	28.4627	27.52	30.3872	26.6628	31.4767	36.6108	34.8465	33.2982	31.4265	22.677	25.5718	32.1326	37.4026	21.7696	22.4584	20.8694	27.7565
698.15	26.2127	22.0568	22.1641	28.2532	22.6281	20.9678	23.3844	28.4801	27.5746	30.4794	26.684	31.4543	36.541	34.9641	33.2217	31.4449	22.8021	25.6837	32.0369	37.3825	21.825	22.5408	20.8373	27.7719
698.6	26.2401	22.1078	22.1728	28.2626	22.6035	20.9915	23.3739	28.4596	27.5597	30.494	26.68	31.4243	36.4979	34.8426	33.3107	31.4351	22.9416	25.8672	31.9929	37.3413	21.9146	22.5662	20.7725	27.7738
699.05	26.2592	22.1515	22.1843	28.2467	22.593	21.0226	23.3775	28.4442	27.5793	30.5485	26.683	31.3881	36.5008	34.6495	33.4207	31.4235	23.086	26.0678	32.0369	37.4016	21.9624	22.5969	20.7176	27.8095
699.5	26.3495	22.2052	22.2376	28.2998	22.614	21.0279	23.4045	28.4249	27.5693	30.5834	26.6327	31.3592	36.539	34.4955	33.5	31.4071	23.2135	26.1614	32.1192	37.4771	21.9461	22.5681	20.6755	27.8139
699.95	26.4258	22.1524	22.2773	28.3693	22.6472	21.0366	23.4406	28.4127	27.5674	30.6156	26.5858	31.3095	36.6155	34.3607	33.5651	31.3768	23.248	26.1324	32.2464	37.5383	21.9396	22.5814	20.6624	27.8171
700.4	26.4937	22.0977	22.2928	28.4132	22.6887	21.0343	23.448	28.4159	27.5984	30.6289	26.5652	31.2752	36.8164	34.3358	33.5545	31.3499	23.2923	26.1259	32.2769	37.654	21.8439	22.6542	20.7139	27.8107
700.85	26.5771	22.036	22.2926	28.4893	22.727	21.0051	23.4086	28.4719	27.6147	30.6043	26.5561	31.2386	36.9856	34.331	33.5344	31.2491	23.311	26.0925	32.2808	37.6885	21.8686	22.7226	20.7523	27.7834
701.3	26.5178	21.9788	22.2364	28.4412	22.7337	20.9953	23.3268	28.5336	27.6377	30.5895	26.5593	31.2626	37.0831	34.3138	33.5191	31.1206	23.2967	26.0935	32.2942	37.6856	21.9328	22.7703	20.7938	27.7913
701.75	26.4673	21.9746	22.1945	28.3778	22.7384	20.978	23.2434	28.5526	27.6712	30.5917	26.5756	31.3552	37.1501	34.2861	33.5086	30.978	23.2865	26.1271	32.254	37.5948	22.0483	22.7712	20.7999	27.7784
702.2	26.4238	21.9606	22.1796	28.3367	22.733	20.9428	23.1841	28.5706	27.6733	30.6295	26.5757	31.4379	36.9569	34.2679	33.501	30.8683	23.2937	26.1057	32.2789	37.437	22.2316	22.7312	20.8184	27.7881
702.65	26.385	21.9521	22.1802	28.2726	22.74	20.9424	23.2027	28.4815	27.6693	30.6692	26.5805	31.5281	36.7953	34.2727	33.5038	30.8906	23.3047	26.1137	32.275	37.3327	22.1914	22.7029	20.82	27.7785
703.1	26.3875	21.9464	22.1433	28.2797	22.7523	20.9293	23.2785	28.376	27.6417	30.6972	26.6061	31.5027	36.6356	34.2698	33.5067	30.9387	23.3665	26.0882	32.2674	37.2237	22.1425	22.663	20.8066	27.7299
703.55	26.383	21.9388	22.1024	28.2976	22.7453	20.9067	23.3365	28.3021	27.6213	30.7288	26.6222	31.404	36.5075	34.3014	33.5211	31.0093	23.3998	26.0759	32.3142	37.2572	22.0352	22.6537	20.8348	27.7158
704	26.3531	21.9381	22.0394	28.2979	22.7736	20.9211	23.389	28.2233	27.6074	30.7059	26.6329	31.3105	36.539	34.3358	33.5306	31.0418	23.3886	26.0775	32.3573	37.3949	21.9141	22.6482	20.8276	27.6706
704.45	26.3012	21.9583	21.964	28.2835	22.8006	20.9231	23.3972	28.2049	27.6483	30.7633	26.6252	31.23	36.54	34.3827	33.5488	31.0153	23.392	26.0349	32.4137	37.4877	21.9253	22.5792	20.8274	27.6545
704.9	26.2813	21.9743	22.0441	28.2482	22.8278	20.9323	23.376	28.2207	27.6986	30.8739	26.5977	31.2077	36.5869	34.44	33.5584	30.9994	23.3765	26.1207	32.4797	37.6254	21.9357	22.5546	20.8403	27.6829
705.35	26.2703	21.9934	22.1276	28.1956	22.8858	20.9766	23.3618	28.2417	27.7148	30.9234	26.5566	31.2248	36.6414	34.5012	33.5565	30.9961	23.3668	26.1797	32.5026	37.7133	21.9355	22.4951	20.8259	27.6713
705.8	26.2842	22.0101	22.2059	28.17	22.8683	21.0125	23.3408	28.2821	27.7511	31.0117	26.526	31.2262	36.6796	34.5653	33.5517	31.0006	23.3538	26.2446	32.5007	37.7229	21.9291	22.4424	20.8244	27.6712
706.25	26.2969	21.9798	22.2794	28.1624	22.8132	21.0334	23.3174	28.3121	27.6903	30.9568	26.5024	31.1913	36.7332	34.5529	33.5	31.0114	23.28	26.3779	32.4672	37.7401	21.8916	22.4984	20.8473	27.6671
706.7	26.2984	21.969	22.2525	28.1668	22.7727	21.0455	23.2931	28.3207	27.6669	30.8255	26.4879	31.1566	36.7819	34.5462	33.4522	30.9927	23.1781	26.3027	32.5734	37.6933	21.8861	22.5131	20.8527	27.6371
707.15	26.3072	21.9537	22.2318	28.1895	22.7311	21.0226	23.2809	28.3042	27.6645	30.7401	26.4851	31.1083	36.7934	34.4764	33.3901	30.975	23.0902	26.2742	32.7388	37.6167	21.9836	22.5617	20.8751	27.6173
707.6	26.3032	21.9424	22.2425	28.176	22.7313	20.9851	23.2881	28.2686	27.6448	30.6535	26.5136	31.0925	36.7724	34.3788	33.3269	30.9912	23.0706	26.278	32.915	37.5584	22.0756	22.595	20.893	27.639
708.05	26.3177	21.9733	22.2693	28.2059	22.7736	20.9585	23.3165	28.2432	27.6614	30.65	26.5531	31.1088	36.7915	34.3167	33.3269	30.9917	23.1646	26.2572	33.2355	37.5374	22.181	22.5899	20.8814	27.6714
708.5	26.3244	21.9782	22.314	28.2366	22.7895	20.943	23.3561	28.2528	27.666	30.7141	26.5826	31.1397	36.8125	34.2698	33.3575	31.0106	23.2618	26.3301	33.2692	37.5747	22.2516	22.625	20.8902	27.7011
708.95	26.3119	21.9857	22.3217	28.2539	22.7999	20.9451	23.3886	28.2942	27.6602	30.7804	26.6391	31.1499	36.8087	34.2526	33.3872	31.007	23.3797	26.3249	33.2455	37.6359	22.1735	22.6609	20.899	27.7712
709.4	26.3098	21.9909	22.29	28.2817	22.8264	20.9333	23.4356	28.3689	27.6479	30.7987	26.6318	31.122	36.7762	34.265	33.4484	30.9899	23.4585	26.3148	33.1841	37.7047	22.1526	22.724	20.902	27.7753
709.85	26.3013	21.975	22.2321	28.2426	22.8302	20.8799	23.472	28.4236	27.6423	30.7926	26.609	31.0922	36.65	34.2966	33.4771	30.9627	23.4821	26.2769	32.9219	37.7506	22.1456	22.7767	20.9106	27.7241
710.3	26.3168	21.9468	22.1763	28.201	22.8498	20.8051	23.4819	28.4033	27.6029	30.7332	26.6032	31.045	36.4817	34.2861	33.4876	30.9368	23.5294	26.2707	32.7734	37.6722	22.1221	22.743	20.9105	27.6904
710.75	26.3419	21.9304	22.1455	28.1559	22.8528	20.72	23.4881	28.3715	27.5567	30.638	26.573	31.04	36.3784	34.289	33.5134	30.8606	23.5481	26.3116	32.604	37.5795	22.1995	22.6772	20.8956	27.6263
711.2	26.381	21.9111	22.1505	28.1307	22.8272	20.6976	23.4536	28.2929	27.5208	30.6002	26.5661	31.023	36.3698	34.2976	33.4713	30.7469	23.5573	26.3178	32.5275	37.4599	22.2058	22.5819	20.8694	27.6266
711.65	26.4267	21.9007	22.1915	28.1216	22.7881	20.7604	23.4081	28.2371	27.5188	30.5692	26.5623	30.9331	36.4099	34.31	33.4484	30.657	23.5527	26.3681	32.4692	37.3442	22.1541	22.494	20.8747	27.6686
712.1	26.4448	21.9312	22.2134	28.1059	22.7409	20.8354	23.3736	28.2129	27.5488	30.5695	26.5455	30.8238	36.4778	34.3502	33.4197	30.5571	23.518	26.3873	32.4711	37.4494	22.1313	22.508	20.8605	27.6788
712.55	26.4565	21.9435	22.2331	28.1162	22.7472	20.907	23.3327	28.1821	27.5887	30.5944	26.5013	30.6887	36.517	34.3769	33.369	30.5731	23.455	26.4066	32.4931	37.5632	22.0756	22.5414	20.8448	27.7066
713	26.4408	21.9557	22.2379	28.1139	22.7757	20.9286	23.3017	28.1685	27.5973	30.5704	26.4756	30.6281	36.5151	34.4152	33.3738	30.6256	23.4095	26.4131	32.385	37.6961	22.048	22.5391	20.7777	27.6746
713.45	26.4202	21.966	22.232	28.116	22.9235	20.9193	23.2901	28.1502	27.5609	30.5056	26.4478	30.719	36.5257	34.4085	33.3614	30.6748	23.3794	26.3587	32.3841	37.8118	22.0831	22.5431	20.6794	27.6608
713.9	26.4243	21.939	22.2376	28.1258	23.0863	20.908	23.2796	28.1568	27.5173	30.4156	26.429	30.8384	36.5448	34.353	33.3346	30.7108	23.3933	26.3116	32.3755	37.7439	22.1099	22.5196	20.6035	27.6738
714.35	26.4494	21.9289	22.2322	28.1313	23.1519	20.9124	23.2804	28.1435	27.5341	30.3194	26.4556	30.9538	36.5735	34.3148	33.326	30.6807	23.4428	26.2452	32.4128	37.6235	22.1478	22.5026	20.5387	27.6554
714.8	26.4646	21.9425	22.2245	28.1393	23.1991	20.9177	23.2754	28.1337	27.6176	30.2892	26.4561	30.9951	36.5888	34.2163	33.2657	30.6339	23.5238	26.2671	32.5428	37.5221	22.1684	22.6224	20.6187	27.6935
715.25	26.4738	21.9464	22.2173	28.1479	23.0697	20.908	23.2468	28.1166	27.7226	30.3517	26.4696	30.9456	36.6222	34.1522	33.2313	30.584	23.5932	26.3382	32.6805	37.3624	22.1831	22.7215	20.7086	27.6734
715.7	26.4583	21.979	22.2181	28.153	22.9323	20.9218	23.228	28.0784	27.8256	30.429	26.47	30.9019	36.6586	34.1752	33.2285	30.5538	23.6448	26.467	32.7933	37.3289	22.0659	22.8174	20.8237	27.6602
716.15	26.4172	21.993	22.2485	28.135	22.8635	20.9095	23.214	28.0668	27.8231	30.5489	26.4793	30.8778	36.6911	34.1713	33.217	30.5291	23.6503	26.606	32.8603	37.3366	21.9311	22.9264	20.9386	27.6957
716.6	26.392	21.9721	22.2763	28.1648	22.8089	20.8908	23.198	28.0398	27.7678	30.6005	26.4971	30.8832	36.7858	34.201	33.2973	30.5146	23.576	26.6154	32.8584	37.3222	21.8197	22.9488	20.9718	27.6932
717.05	26.339	21.9658	22.3014	28.1818	22.8365	20.8316	23.1845	27.9588	27.6959	30.6025	26.4547	30.8945	36.846	34.2526	33.3212	30.5069	23.5196	26.5845	32.7513	37.436	21.6755	22.973	20.9953	27.7237
717.5	26.3106	21.9432	22.3225	28.1947	22.8729	20.7492	23.1538	27.8832	27.6342	30.6125	26.3606	30.8794	36.8297	34.2345	33.3126	30.4975	23.4534	26.4664	32.6336	37.4781	21.815	22.9712	20.9934	27.7507
717.95	26.2865	21.9488	22.3117	28.2285	22.8992	20.7001	23.1092	27.8028	27.6134	30.5768	26.2099	30.8533	36.6595	34.2191	33.325	30.5207	23.4679	26.3603	32.6078	37.5575	21.968	22.9286	20.9846	27.7342
718.4	26.2896	21.9856	22.3135	28.1772	22.9121	20.6858	23.0937	27.7502	27.6284	30.5794	26.0742	30.8344	36.3602	34.1924	33.2552	30.5308	23.516	26.3294	32.6442	37.6416	22.1095	22.8658	20.97	27.7024
718.85	26.3745	22.0055	22.298	28.1554	22.9244	20.7723	23.1235	27.7987	27.6565	30.5828	26.0259	30.8201	36.0513	34.1273	33.2198	30.5378	23.5561	26.3347	32.7168	37.7076	22.2605	22.806	20.9743	27.7048
719.3	26.4459	22.0318	22.2739	28.1488	22.9263	20.8654	23.1857	27.8461	27.6585	30.5708	26.1133	30.8185	35.8859	34.1044	33.1978	30.5681	23.5973	26.3259	32.7666	37.7832	22.2836	22.7712	20.9529	27.6987
719.75	26.5203	22.004	22.2756	28.1268	22.9136	20.9331	23.2593	27.91	27.6867	30.5748	26.2379	30.8513	36.0236	34.092	33.1539	30.5498	23.6076	26.3281	32.7264	37.7918	22.3318	22.7522	20.9294	27.6773
720.2	26.547	21.9554	22.2655	28.13	22.9064	20.974	23.3114	27.9628	27.6724	30.586	26.3465	30.878	36.256	34.0853	33.1395	30.5882	23.64	26.3252	32.6786	37.7985	22.4094	22.7498	20.9133	27.7131
720.65	26.5273	21.9282	22.2715	28.1296	22.8857	20.9492	23.3151	27.9862	27.6793	30.6027	26.4045	30.8922	36.5123	34.092	33.1118	30.6268	23.6493	26.3157	32.6518	37.5967	22.5324	22.7303	20.8762	27.7083
721.1	26.4994	21.8928	22.2893	28.1112	22.8848	20.9204	23.2917	28.0008	27.7119	30.6107	26.369	30.8914	36.6901	34.0776	33.084	30.617	23.6939	26.3753	32.5399	37.3854	22.5987	22.717	20.8932	27.6888
721.55	26.475	21.8727	22.2948	28.0852	22.8967	20.9208	23.2635	27.9867	27.7192	30.5882	26.3185	30.8651	36.738	34.068	33.0601	30.6157	23.7511	26.4186	32.4309	37.1922	22.6227	22.7055	20.9279	27.7299
722	26.4739	21.8675	22.3077	28.0616	23.0014	20.9342	23.2346	27.967	27.7826	30.5926	26.2743	30.8311	36.7781	34.0747	33.0401	30.5296	23.7966	26.4674	32.3678	37.0612	22.6167	22.7232	20.9502	27.7041
722.45	26.4508	21.8584	22.3182	28.0165	23.1262	20.9681	23.2171	27.9262	27.7982	30.5796	26.2451	30.8554	36.8116	34.0317	33.041	30.4258	23.857	26.501	32.341	37.2782	22.5595	22.7774	20.9992	27.6999
722.9	26.4358	21.8508	22.3107	27.9948	23.2065	21.0186	23.2043	27.9258	27.7664	30.6171	26.2558	30.9176	36.8479	33.8816	33.042	30.3554	23.8674	26.499	32.5198	37.5383	22.5365	22.7931	20.9963	27.7086
723.35	26.3157	21.9141	22.2849	27.988	23.3092	21.0481	23.1955	27.9365	27.7317	30.6948	26.2632	30.9389	36.8508	33.7257	33.0257	30.3096	23.8108	26.4497	32.6528	37.8644	22.5145	22.8425	20.978	27.6797
723.8	26.2006	21.9639	22.2543	27.9906	23.2587	21.0585	23.2026	27.9425	27.6374	30.6955	26.27	30.9515	36.8412	33.5574	33.0276	30.2935	23.7613	26.41	32.7474	38.0433	22.4962	22.8554	20.9822	27.7078
724.25	26.0862	22.0132	22.225	28.0001	23.2009	21.0307	23.2172	27.9758	27.5618	30.7351	26.2769	30.8708	36.8049	33.4838	33.0286	30.2916	23.734	26.3584	32.8125	37.9668	22.4937	22.8398	20.9726	27.7099
724.7	25.9856	22.0728	22.2289	27.9927	23.1641	20.9754	23.2368	27.9612	27.5515	30.7194	26.2595	30.745	36.7446	33.631	33.0697	30.2689	23.7658	26.3633	32.8096	37.8109	22.5025	22.864	20.9828	27.7309
725.15	26.1062	22.0575	22.2671	27.987	23.0792	20.9235	23.2461	27.925	27.5552	30.7028	26.2531	30.6608	36.6863	33.7831	33.1347	30.2135	23.8697	26.4279	32.8651	37.6244	22.5404	22.8565	20.9841	27.7171
725.6	26.2061	22.0487	22.3124	27.9756	23.0439	20.9202	23.2104	27.8367	27.5863	30.7189	26.2445	30.6125	36.6395	33.937	33.1565	30.1665	24.0246	26.5176	32.8679	37.5297	22.5533	22.8891	20.9956	27.7163
726.05	26.3402	22.0182	22.3664	27.9745	22.9924	20.9618	23.1657	27.71	27.6363	30.6772	26.2617	30.585	36.5935	34.0336	33.1554	30.1146	24.1837	26.5716	32.8517	37.5498	22.5566	22.946	21.0097	27.7525
726.5	26.4541	21.9977	22.3914	27.9835	22.9523	21.0259	23.1047	27.5879	27.676	30.66	26.2641	30.5969	36.4664	34.0365	33.0921	30.0806	24.2575	26.552	32.8717	37.6263	22.5512	22.9796	21.0307	27.7585
726.95	26.4393	22.0139	22.3975	27.987	22.9433	21.0903	23.0516	27.5119	27.7156	30.6087	26.3151	30.5862	36.3593	34.046	33.0335	30.0754	24.3208	26.5166	32.9243	37.6971	22.5374	23.0024	21.0676	27.853
727.4	26.4589	22.0148	22.3874	28.0139	22.943	21.0906	23.0697	27.5714	27.7633	30.5621	26.3829	30.5514	36.2158	34.0556	32.9869	30.079	24.2638	26.3789	32.975	37.7612	22.5598	23.0038	21.0566	27.8811
727.85	26.4891	22.0352	22.3509	28.0353	22.9654	21.0704	23.0874	27.6458	27.7855	30.5613	26.4146	30.5576	36.1546	34.0967	32.9546	30.0932	24.1684	26.381	33.0104	37.8051	22.5671	22.9591	21.021	27.8755
728.3	26.5186	22.0393	22.3099	28.0385	22.9905	21.0412	23.1262	27.7483	27.7706	30.5507	26.4882	30.5497	36.3258	34.1187	32.949	30.0882	24.1016	26.4027	32.8832	37.8931	22.5738	22.8853	20.9773	27.8955
728.75	26.5626	22.0323	22.2761	28.0568	23.0034	21.0064	23.1424	27.8451	27.7499	30.561	26.45	30.5541	36.4664	34.112	32.9301	30.0948	24.0114	26.423	32.7226	37.9534	22.6248	22.8561	20.943	27.8438
729.2	26.5788	22.0445	22.2611	28.0415	23.0081	21.0159	23.1074	27.855	27.7145	30.5684	26.3727	30.5592	36.6767	34.1034	32.9129	30.1267	23.9849	26.5084	32.648	38.0155	22.6406	22.8067	20.9533	27.8492
729.65	26.561	22.0584	22.2823	28.0119	23.0255	21.034	23.0824	27.8658	27.6781	30.5737	26.2945	30.5484	36.845	34.068	32.9148	30.1564	23.9553	26.5182	32.625	38.0222	22.6989	22.8237	20.9789	27.8532
730.1	26.555	22.0668	22.3219	28.0034	23.0243	21.0518	23.0365	27.862	27.6779	30.5936	26.1967	30.5194	36.8823	34.0164	32.9023	30.3002	23.9534	26.509	32.779	37.9543	22.756	22.8435	21.0147	27.8324
730.55	26.5463	22.07	22.3568	27.9739	23.0796	21.0613	23.0309	27.8237	27.6699	30.6086	26.1787	30.5033	36.9378	34.0021	32.8912	30.427	23.9397	26.5278	32.9071	37.8883	22.7001	22.8309	21.0424	27.8444
731	26.5365	22.0501	22.3856	27.9717	23.1572	21.0428	23.0607	27.8027	27.6798	30.6223	26.1864	30.4903	36.9168	33.9676	32.8907	30.4724	23.9281	26.552	32.997	37.8319	22.6757	22.8468	21.0661	27.7991
731.45	26.5095	22.0246	22.3722	27.9763	23.1789	21.0395	23.0892	27.7925	27.707	30.587	26.2106	30.4792	36.869	33.9935	32.8585	30.5009	23.9541	26.594	33.0821	37.8252	22.6658	22.824	21.1083	27.8024
731.9	26.4737	22.0013	22.3323	27.9575	23.2267	21.0413	23.1406	27.7706	27.7241	30.5328	26.2098	30.4926	36.7972	34.0566	32.8532	30.3307	23.9583	26.663	33.0946	37.8185	22.6569	22.9044	21.1374	27.8114
732.35	26.4486	22.005	22.2919	27.9443	23.1612	21.0937	23.1539	27.7599	27.739	30.4965	26.1971	30.4414	36.694	34.0996	32.8758	30.143	23.9864	26.6817	33.1519	37.8377	22.7198	22.9701	21.1598	27.8098
732.8	26.4438	22.0197	22.2402	27.9136	23.0894	21.1602	23.1441	27.7397	27.7106	30.5796	26.2048	30.3391	36.6375	34.1952	32.8888	29.9958	24.0115	26.683	33.1739	37.8243	22.7916	23.009	21.163	27.8574
733.25	26.4548	22.043	22.1524	27.9138	23.052	21.183	23.1349	27.7025	27.7091	30.7275	26.1958	30.2366	36.5849	34.1732	32.8766	29.8693	24.0256	26.638	33.172	37.8042	22.8165	23.073	21.1593	27.8517
733.7	26.4806	22.0648	22.0874	27.9427	22.9886	21.2057	23.1633	27.678	27.6925	30.8872	26.2081	30.1271	36.584	34.1187	32.7756	29.8438	24.0656	26.5935	33.1911	37.8023	22.8566	23.068	21.1492	27.8492
734.15	26.4888	22.0516	22.0244	27.9822	23.0038	21.1743	23.2255	27.6392	27.6941	31.0271	26.2121	30.1008	36.6452	34.0575	32.6318	29.822	24.1145	26.5747	33.1691	37.7927	22.8741	23.0923	21.1629	27.845
734.6	26.4574	22.1019	21.9852	28.0271	23.018	21.1384	23.2855	27.6146	27.7327	30.9486	26.1873	30.1592	36.6165	33.9715	32.4919	29.8158	24.1663	26.6143	33.194	37.8262	22.8596	23.1278	21.1796	27.7914
735.05	26.4486	22.1381	22.0819	28.05	23.036	21.129	23.3364	27.6049	27.7134	30.8603	26.1659	30.1988	36.6136	33.9619	32.4358	29.8098	24.2088	26.6951	33.1978	37.8443	22.8513	23.1442	21.1689	27.7428
735.5	26.4156	22.2003	22.1956	28.0437	23.0519	21.1175	23.3024	27.6094	27.6971	30.7798	26.1179	30.2295	36.5735	33.9571	32.5153	29.801	24.2998	26.7746	33.1596	37.8539	22.764	23.1899	21.1845	27.6974
735.95	26.3921	22.2659	22.3077	28.0288	23.0535	21.105	23.2613	27.651	27.6867	30.7209	26.018	30.2344	36.5075	33.9361	32.5963	29.801	24.3666	26.8696	33.1634	37.8568	22.7	23.2199	21.1661	27.6747
736.4	26.4297	22.2391	22.3727	28.0184	23.0713	21.102	23.2165	27.6639	27.6806	30.7562	25.9214	30.2014	36.6022	33.8921	32.6822	29.7879	24.4073	26.8526	33.1156	37.8377	22.6495	23.2228	21.1415	27.702
736.85	26.4516	22.1979	22.3688	28.0113	23.091	21.0939	23.1724	27.6705	27.7019	30.7431	25.8418	30.1946	36.6395	33.8577	32.7114	29.7655	24.4328	26.8013	33.1357	37.7965	22.6289	23.1699	21.1671	27.7406
737.3	26.4918	22.1296	22.3262	28.0107	23.1298	21.0811	23.1535	27.6449	27.7132	30.712	25.819	30.1886	36.6968	33.8538	32.6828	29.7437	24.3596	26.7715	33.1778	37.8491	22.6859	23.073	21.1726	27.7982
737.75	26.5103	22.0694	22.2907	27.9998	23.1308	21.0939	23.127	27.6095	27.7014	30.6453	25.9137	30.1879	36.7485	33.8864	32.6997	29.7188	24.3083	26.7173	33.2351	37.9295	22.7344	22.962	21.1793	27.824
738.2	26.4694	22.0513	22.3053	27.969	23.1312	21.0955	23.1144	27.6019	27.6703	30.572	26.0034	30.1995	36.694	33.9456	32.6955	29.6968	24.278	26.6931	33.3547	38.1695	22.799	22.9088	21.2308	27.8363
738.65	26.444	22.0764	22.2987	27.9245	23.1188	21.1073	23.1048	27.5963	27.6399	30.5355	26.0821	30.1871	36.672	33.9667	32.6993	29.6609	24.2859	26.6763	33.4216	38.4669	22.8461	22.8487	21.2373	27.9109
739.1	26.3912	22.0936	22.3189	27.8946	23.0936	21.114	23.1295	27.6058	27.6359	30.5055	26.1392	30.1881	36.6242	33.9571	32.6942	29.6517	24.3139	26.6283	33.4818	38.6122	22.9037	22.8173	21.2382	27.9359
739.55	26.3781	22.1174	22.3227	27.8748	23.1338	21.1671	23.1492	27.6079	27.6512	30.524	26.1284	30.1833	36.5821	33.9514	32.657	29.6543	24.3267	26.5852	33.4331	38.6868	22.9288	22.8255	21.2516	27.9665
740	26.4093	22.1269	22.2799	27.8866	23.1449	21.2336	23.1595	27.6012	27.665	30.5709	26.1477	30.1835	36.5773	33.9504	32.6515	29.6711	24.3512	26.5948	33.3748	38.4391	22.9391	22.7743	21.1957	28.0054
740.45	26.4142	22.1	22.2569	27.8915	23.1568	21.2725	23.169	27.6016	27.676	30.6096	26.1546	30.1931	36.6509	33.9629	32.644	29.72	24.3564	26.6463	33.3069	38.1475	22.9296	22.8784	21.2365	27.9283
740.9	26.4884	22.0911	22.2084	27.8825	23.1864	21.3242	23.131	27.6106	27.6716	30.6621	26.1511	30.1904	36.7236	34.026	32.6466	29.7102	24.3479	26.6989	33.2743	37.9218	22.8885	22.9357	21.279	27.9096
741.35	26.5237	22.0564	22.1753	27.8727	23.1877	21.268	23.0422	27.639	27.7591	30.6301	26.1545	30.2009	36.7905	34.0604	32.6322	29.6818	24.3551	26.7824	33.3834	37.7764	22.9158	22.986	21.323	27.9226
741.8	26.543	22.0341	22.2025	27.8283	23.1777	21.1967	22.9684	27.6509	27.8776	30.5663	26.1278	30.1963	36.8355	34.0623	32.5811	29.6328	24.3442	26.8316	33.4771	37.8004	22.9778	23.1109	21.4024	27.9046
742.25	26.5743	22.0355	22.2186	27.8084	23.1834	21.1383	22.9028	27.6277	27.996	30.4952	26.1223	30.1864	36.7905	34.0728	32.583	29.5561	24.3083	26.8238	33.5966	37.8367	23.0302	23.1527	21.321	27.9536
742.7	26.5407	22.0315	22.2736	27.8038	23.1776	21.0702	22.8695	27.6033	28.1227	30.3871	26.1	30.1949	36.8001	33.9992	32.5674	29.5194	24.3178	26.8514	33.653	37.874	23.1234	23.2367	21.2646	27.9721
743.15	26.5428	22.0175	22.3287	27.8099	23.1652	21.0598	22.939	27.5356	28.0459	30.3744	26.0763	30.1631	36.716	33.938	32.6658	29.5129	24.3144	26.8339	33.6272	37.8558	23.1911	23.2916	21.2055	27.9308
743.6	26.514	21.9786	22.3547	27.8369	23.1859	21.0434	22.9741	27.4889	27.925	30.3916	26.0507	30.1972	36.4931	33.872	32.8344	29.5016	24.3219	26.846	33.6071	37.8357	23.1954	23.2936	21.1528	27.913
744.05	26.4886	21.9175	22.3846	27.8459	23.1712	21.0354	23.0065	27.4877	27.8023	30.4186	26.0202	30.2617	36.2474	33.7936	32.8937	29.5204	24.3806	26.8647	33.5564	37.8262	23.3435	23.2623	21.1844	27.8937
744.5	26.498	21.8625	22.3754	27.8347	23.1536	21.04	23.0355	27.4789	27.6964	30.4986	26.0314	30.2803	35.9548	33.7448	32.9439	29.532	24.4549	26.8757	33.5172	37.8109	23.4603	23.2275	21.2038	27.8871
744.95	26.4908	21.89	22.361	27.8331	23.15	21.0214	23.023	27.498	27.685	30.535	26.0295	30.3254	35.8534	33.7324	32.8064	29.5231	24.5248	26.896	33.3681	37.8147	23.5449	23.1876	21.2209	27.9341
745.4	26.4999	21.9416	22.3515	27.8389	23.1466	21.03	23.0488	27.515	27.7052	30.5623	26.107	30.244	36.0676	33.7649	32.6026	29.5457	24.6958	26.9984	33.1816	37.7937	23.6338	23.1493	21.2162	27.9852
745.85	26.486	22.0165	22.3456	27.866	23.1877	21.0476	23.0484	27.5023	27.7505	30.5945	26.183	30.1517	36.3411	33.7879	32.4781	29.5211	24.8156	27.1464	33.0094	37.7707	23.5068	23.1455	21.2114	27.9802
746.3	26.4534	22.097	22.3874	27.8999	23.1979	21.043	23.0342	27.4934	27.7391	30.5881	26.2028	30.099	36.6241	33.8414	32.4018	29.4726	24.8703	27.2373	32.9435	37.7612	23.3775	23.1114	21.2099	27.9684
746.75	26.4134	22.1107	22.4327	27.8842	23.1173	21.1149	23.0283	27.4861	27.7234	30.57	26.2346	30.0346	36.7867	33.8433	32.4168	29.424	24.9257	27.3346	33.151	37.7086	23.2757	23.107	21.2085	27.9326
747.2	26.4441	22.1278	22.465	27.8575	23.0043	21.169	23.0141	27.4847	27.6928	30.5597	26.1271	30.0287	36.7504	33.8156	32.4356	29.336	24.7727	27.2283	33.3661	37.7592	23.2281	23.0734	21.2443	27.8641
747.65	26.4982	22.1224	22.4969	27.8153	22.8651	21.1967	23.0401	27.4958	27.6217	30.539	26.0313	30.0029	36.6882	33.8146	32.4486	29.2951	24.6579	27.0879	33.6339	37.8319	23.2594	23.0295	21.2491	27.8683
748.1	26.5286	22.091	22.4662	27.7962	22.7932	21.2328	23.0761	27.5063	27.6004	30.5281	25.9907	29.9857	36.6299	33.7745	32.4365	29.2881	24.5537	26.9776	33.7601	37.9132	23.2871	23.0224	21.2522	27.8719
748.55	26.566	22.0759	22.4189	27.823	22.869	21.1539	23.0968	27.5152	27.5993	30.5514	25.9459	29.9941	36.6213	33.7783	32.4157	29.2652	24.4654	26.8929	33.7334	38.093	23.2822	23.0074	21.2504	27.8833
749	26.5329	22.049	22.3686	27.8466	22.9877	21.0894	23.0876	27.5172	27.6166	30.5526	25.9694	29.9852	36.6643	33.7888	32.419	29.3016	24.4843	26.9105	33.7391	38.1178	23.236	23.0769	21.2068	27.9371
749.45	26.5136	22.0393	22.3196	27.8798	23.1124	21.0505	23.0356	27.5042	27.6466	30.5627	25.9507	29.9885	36.7169	33.7726	32.3947	29.3053	24.4875	26.9236	33.698	38.0968	23.2315	23.1447	21.209	27.9698
749.9	26.5727	22.0215	22.3111	27.8799	23.1917	21.0253	22.9309	27.4931	27.6499	30.5647	25.9221	29.9739	36.7523	33.7984	32.3653	29.2903	24.5241	26.9496	33.7888	38.0624	23.2045	23.2065	21.2104	27.9785
750.35	26.6394	22.0104	22.3105	27.8674	23.216	21.0508	22.8226	27.4662	27.5666	30.5757	25.9176	29.9361	36.7685	33.741	32.3696	29.3119	24.5462	26.9278	33.8175	37.9926	23.2752	23.267	21.2286	27.9914
750.8	26.7085	22.0116	22.3233	27.8642	23.2124	21.0537	22.7384	27.416	27.4588	30.6006	25.9166	29.9257	36.7963	33.6626	32.3648	29.2622	24.5574	26.9184	33.764	37.9773	23.3636	23.2768	21.2735	27.9802
751.25	26.7663	22.0037	22.3327	27.8447	23.2186	21.0456	22.7021	27.4099	27.354	30.6701	25.9524	29.8976	36.8278	33.6463	32.3822	29.2365	24.5994	26.9251	33.7334	37.9973	23.4204	23.3011	21.2796	27.959
751.7	26.7273	22.0605	22.3342	27.8476	23.2422	21.0352	22.7758	27.391	27.2982	30.7186	25.9524	29.8559	36.8212	33.6014	32.3936	29.2314	24.6276	26.9297	33.5765	37.9983	23.5391	23.3393	21.27	27.9626
752.15	26.6633	22.1192	22.3562	27.8463	23.2502	21.0392	22.845	27.381	27.4018	30.7103	25.9331	29.8109	36.7829	33.6062	32.4064	29.1873	24.66	26.9607	33.5325	37.9763	23.5465	23.3796	21.2529	27.9383
752.6	26.6277	22.1627	22.3662	27.8409	23.2736	21.0541	22.9244	27.4103	27.5161	30.6936	25.9212	29.776	36.6787	33.6836	32.4112	29.1539	24.7143	26.9752	33.6014	37.9849	23.5425	23.4247	21.2309	27.9165
753.05	26.6003	22.2164	22.3529	27.8671	23.2776	21.0704	22.9773	27.3926	27.6526	30.5723	25.9055	29.7624	36.562	33.7171	32.3992	29.1193	24.724	26.9677	33.5507	37.9505	23.5361	23.4705	21.2145	27.8778
753.5	26.6315	22.2269	22.3267	27.8875	23.278	21.0796	22.9696	27.3793	27.7522	30.5348	25.9199	29.7465	36.5677	33.741	32.4274	29.0749	24.7292	26.9483	33.6119	37.9514	23.465	23.4925	21.213	27.8332
753.95	26.6987	22.2232	22.2702	27.9104	23.2914	21.0474	22.9684	27.3761	27.7789	30.5228	25.8997	29.6871	36.6156	33.8003	32.3945	29.054	24.7186	26.8709	33.6626	37.9381	23.4492	23.4553	21.1985	27.8262
754.4	26.7363	22.2338	22.2287	27.9336	23.2959	21.021	22.9391	27.3529	27.8058	30.5099	25.7824	29.5832	36.6787	33.7697	32.3702	29.0781	24.7125	26.7848	33.762	37.8998	23.4519	23.4247	21.1786	27.8264
754.85	26.7403	22.2271	22.2005	27.9086	23.2735	20.9904	22.921	27.3574	27.8049	30.5559	25.6485	29.4543	36.78	33.7075	32.376	29.0784	24.7316	26.7211	34.0365	37.9113	23.4885	23.3544	21.2046	27.8671
755.3	26.7223	22.2254	22.2037	27.8659	23.2455	20.9785	22.9135	27.38	27.7851	30.5461	25.4914	29.3727	36.8011	33.6741	32.3355	29.0679	24.8112	26.6993	34.2229	37.8969	23.5393	23.2813	21.227	27.9207
755.75	26.6647	22.2188	22.2392	27.8239	23.1811	21.0445	22.9139	27.3962	27.7634	30.5669	25.3963	29.4102	36.8164	33.6186	32.3392	29.0617	24.9225	26.8156	34.3377	37.9314	23.5892	23.2765	21.2625	27.9423
756.2	26.6061	22.2204	22.2549	27.7728	23.0984	21.0808	22.9388	27.3966	27.7407	30.608	25.4865	29.4693	36.8393	33.6023	32.3315	29.0345	24.9812	26.9787	34.266	37.9447	23.6382	23.2614	21.3055	27.9683
756.65	26.6627	22.2475	22.3047	27.7557	23.1049	21.1153	22.9427	27.3746	27.7401	30.6436	25.5957	29.5567	36.8097	33.6234	32.2858	29.0265	25.0339	27.1167	34.0919	37.8405	23.6532	23.2941	21.3139	27.9612
757.1	26.7477	22.2793	22.3207	27.7676	23.1327	21.1418	22.9312	27.3324	27.767	30.6951	25.7428	29.6128	36.7781	33.6597	32.2532	29.0252	25.0172	27.2143	33.9743	37.6005	23.6511	23.3433	21.3206	27.9341
757.55	26.8765	22.3119	22.3295	27.7796	23.1878	21.1178	22.9245	27.2921	27.7608	30.6984	25.8638	29.6047	36.7255	33.6454	32.2104	29.0052	24.975	27.2084	33.8921	37.2754	23.618	23.4047	21.3365	27.9327
758	27.0215	22.2946	22.3644	27.8023	23.2723	21.1301	22.9254	27.2668	27.769	30.6809	25.8642	29.6074	36.6873	33.5909	32.1727	28.9666	24.9744	27.1634	33.9342	37.0191	23.5729	23.4603	21.3421	27.9045
758.45	26.9744	22.2446	22.3705	27.8287	23.2819	21.143	22.928	27.28	27.7656	30.6671	25.866	29.609	36.6701	33.4656	32.1387	28.9021	24.9549	27.1585	33.9944	36.9397	23.532	23.4756	21.3453	27.8378
758.9	26.919	22.1666	22.3949	27.8244	23.2652	21.1216	22.9439	27.3034	27.7808	30.6276	25.833	29.6005	36.6634	33.3183	32.106	28.876	24.9192	27.1539	34.0049	37.1654	23.5753	23.4607	21.3536	27.796
759.35	26.8394	22.1078	22.4167	27.8166	23.2755	21.1075	22.9385	27.3062	27.8531	30.6106	25.7968	29.6028	36.716	33.2285	32.0822	28.8695	24.9159	27.1539	34.0432	37.4599	23.5927	23.442	21.338	27.7302
759.8	26.7679	22.1071	22.4264	27.7867	23.2855	21.0983	22.8974	27.3253	27.899	30.5925	25.7802	29.6199	36.7571	33.2246	32.0797	28.9679	24.9139	27.1487	34.0116	37.7047	23.6009	23.4416	21.3288	27.6704
760.25	26.7802	22.1317	22.4441	27.7365	23.3208	21.0912	22.8831	27.2934	27.9228	30.563	25.7519	29.6418	36.8077	33.3403	32.102	29.1244	24.9429	27.1098	33.9237	37.874	23.6379	23.4655	21.3276	27.7206
760.7	26.7545	22.1797	22.468	27.7255	23.357	21.1109	22.866	27.2511	27.9001	30.5418	25.7282	29.6801	36.8909	33.435	32.1187	29.2165	25.0262	27.0923	33.8376	37.8606	23.607	23.5107	21.3258	27.7499
761.15	26.6907	22.2146	22.4775	27.7151	23.3641	21.1163	22.8725	27.2354	27.8417	30.5381	25.7129	29.6842	36.8814	33.5144	32.1125	29.3083	25.0869	27.0919	33.6454	37.8376	23.6239	23.5348	21.3481	27.7999
761.6	26.6269	22.2268	22.5401	27.7519	23.3508	21.0851	22.9001	27.1982	27.8024	30.5626	25.7107	29.6484	36.8718	33.5555	32.0527	29.2349	25.1337	27.105	33.5326	37.8386	23.6463	23.5384	21.3743	27.8775
762.05	26.5793	22.2346	22.6031	27.7993	23.3433	21.064	22.9165	27.1824	27.7866	30.6044	25.7077	29.5866	36.8594	33.5249	31.9363	29.1013	25.1485	27.1634	33.588	37.8396	23.6208	23.5344	21.3754	27.9218
762.5	26.5607	22.2479	22.6483	27.8073	23.3641	21.0339	22.9212	27.1837	27.7772	30.6532	25.7185	29.5274	36.7867	33.4933	31.8254	28.9712	25.1304	27.2034	33.6463	37.8797	23.6323	23.4971	21.3564	27.9862
762.95	26.6137	22.2377	22.6929	27.82	23.3941	21.0172	22.9123	27.1734	27.7773	30.6611	25.7547	29.5032	36.7466	33.4838	31.7264	28.8362	25.129	27.2652	33.8634	37.8893	23.6741	23.452	21.3603	28.0529
763.4	26.6457	22.2147	22.6245	27.7958	23.5065	21.0428	22.9065	27.1848	27.7701	30.6464	25.7935	29.4929	36.7246	33.4551	31.6981	28.759	25.125	27.3344	34.0422	37.874	23.7377	23.4374	21.3953	28.1026
763.85	26.685	22.1859	22.5574	27.7548	23.6187	21.0465	22.8948	27.1964	27.7744	30.6232	25.8278	29.533	36.6672	33.4608	31.7628	28.7059	25.1091	27.2879	34.1015	37.8539	23.8275	23.4247	21.4748	28.1353
764.3	26.7295	22.1353	22.476	27.7335	23.6908	21.0716	22.8881	27.2027	27.7859	30.5885	25.8608	29.563	36.6452	33.5048	31.836	28.6969	25.0976	27.1902	34.1761	37.7937	23.8886	23.4853	21.5904	28.1399
764.75	26.7253	22.1171	22.3926	27.702	23.7328	21.1043	22.8863	27.2174	27.7709	30.5644	25.8374	29.634	36.6395	33.5163	31.9187	28.6612	25.0553	27.0776	34.1197	37.7679	23.8889	23.5511	21.6388	28.1016
765.2	26.7304	22.0917	22.3602	27.6745	23.6572	21.112	22.8716	27.2172	27.7526	30.5428	25.7953	29.7333	36.6117	33.5497	31.9623	28.6528	25.0386	26.9709	34.0996	37.7812	23.8324	23.5739	21.6215	28.0638
765.65	26.7044	22.0636	22.3099	27.6718	23.5632	21.1464	22.8766	27.2088	27.7101	30.523	25.7736	29.7604	36.6079	33.566	31.9598	28.6375	25.0964	27.0217	34.1063	37.8482	23.7634	23.6033	21.6619	27.9967
766.1	26.6678	22.0626	22.284	27.6719	23.5155	21.1444	22.8848	27.176	27.6834	30.5223	25.7405	29.7801	36.6175	33.5488	31.9568	28.5926	25.1643	27.1721	34.1837	37.9658	23.7111	23.5815	21.6763	27.9589
766.55	26.6552	22.0815	22.2607	27.6931	23.4955	21.1329	22.9205	27.1415	27.6737	30.5444	25.7307	29.6876	36.6079	33.5249	31.937	28.5772	25.2356	27.3096	34.3186	38.0423	23.6934	23.5538	21.7243	27.9981
767	26.6473	22.1256	22.2442	27.7142	23.5096	21.097	22.9811	27.1192	27.6865	30.5719	25.7177	29.556	36.6098	33.5344	31.9186	28.5677	25.2785	27.4135	34.4037	38.1111	23.7346	23.5629	21.7777	28.0105
767.45	26.6672	22.1663	22.2549	27.7218	23.5495	21.0577	23.0067	27.1045	27.7086	30.6012	25.6821	29.4617	36.6155	33.5287	31.9073	28.5675	25.2786	27.4251	34.4878	38.0547	23.8357	23.5642	21.6683	28.0412
767.9	26.6875	22.1943	22.2905	27.7109	23.5473	21.0595	23.0351	27.1774	27.7268	30.6025	25.6653	29.3842	36.6299	33.6348	31.9005	28.5777	25.2644	27.3871	34.4505	37.939	23.9209	23.5895	21.5597	28.0376
768.35	26.6934	22.2036	22.3418	27.6781	23.537	21.0302	22.9992	27.2512	27.7419	30.5799	25.6448	29.3553	36.6882	33.7783	31.9317	28.5771	25.2617	27.3439	34.4438	37.9208	23.998	23.6391	21.4566	27.9989
768.8	26.6877	22.212	22.3831	27.6675	23.5367	20.9968	22.9408	27.298	27.7518	30.5713	25.6418	29.3527	36.8776	33.828	31.9774	28.5822	25.2633	27.3323	34.4515	37.8539	24.0414	23.6627	21.3817	28.0222
769.25	26.6876	22.2279	22.3975	27.6635	23.5137	20.9441	22.8989	27.3401	27.7718	30.5578	25.6531	29.334	37.0898	33.9055	31.996	28.591	25.2401	27.3552	34.4333	37.8702	24.0141	23.6987	21.3736	28.0275
769.7	26.6929	22.2368	22.3635	27.6744	23.4905	20.861	22.853	27.2549	27.7799	30.5442	25.6519	29.3001	37.2256	33.7965	31.9884	28.6401	25.2611	27.4053	34.4831	37.9132	23.988	23.7146	21.3782	28.0602
770.15	26.6959	22.2228	22.3077	27.7071	23.4747	20.8415	22.8458	27.1571	27.829	30.5272	25.6511	29.2946	37.3088	33.6511	31.9512	28.7178	25.3008	27.4518	34.506	37.8759	23.9551	23.7107	21.3673	28.0128
770.6	26.7197	22.2108	22.2589	27.7161	23.4396	20.9063	22.8402	27.0827	27.8501	30.4716	25.6418	29.283	37.1338	33.5536	31.9269	28.7545	25.3475	27.4646	34.4945	37.8836	23.9493	23.727	21.3589	27.9075
771.05	26.7065	22.1882	22.2192	27.7296	23.4325	20.9824	22.8367	27.0457	27.8394	30.4037	25.6312	29.2969	36.913	33.4465	31.9307	28.7846	25.4367	27.4658	34.4974	37.8797	23.9641	23.7089	21.3708	27.8734
771.5	26.6891	22.1491	22.2088	27.7455	23.449	21.0982	22.8423	27.0664	27.8542	30.3856	25.6211	29.3261	36.7523	33.4149	31.9149	28.7204	25.4541	27.4615	34.5041	37.8855	23.9868	23.7001	21.3864	27.8361
771.95	26.7191	22.1184	22.2211	27.737	23.4666	21.1774	22.841	27.0694	27.8288	30.4173	25.6246	29.3323	36.6117	33.4053	31.8598	28.6211	25.4292	27.4803	34.5003	37.8864	23.9154	23.6872	21.4044	27.9349
772.4	26.6987	22.0709	22.2459	27.7335	23.5282	21.181	22.8546	27.0589	27.8116	30.4454	25.5989	29.32	36.5764	33.4073	31.7354	28.5182	25.4017	27.5227	34.5271	37.8749	23.8249	23.6614	21.4172	28.0698
772.85	26.7045	22.0373	22.2758	27.724	23.5492	21.1845	22.8672	27.011	27.8351	30.5048	25.58	29.2829	36.5572	33.4063	31.6086	28.4374	25.385	27.5638	34.5299	37.8472	23.7421	23.7023	21.4302	28.1249
773.3	26.7275	22.0711	22.3034	27.6997	23.5543	21.1447	22.8692	26.9796	27.8393	30.5207	25.5576	29.2204	36.5161	33.4178	31.5473	28.4101	25.4248	27.5698	34.464	37.8376	23.6317	23.7383	21.4135	28.1729
773.75	26.6914	22.1095	22.3175	27.6797	23.5615	21.1129	22.8651	26.992	27.8433	30.4947	25.523	29.1949	36.4998	33.4283	31.5718	28.3871	25.4392	27.5173	34.3377	37.8348	23.7196	23.7786	21.4244	28.1303
774.2	26.7034	22.1789	22.3279	27.6647	23.5602	21.1185	22.8596	27.0019	27.8447	30.511	25.5505	29.1848	36.5017	33.412	31.6433	28.3841	25.415	27.4431	34.2258	37.8587	23.8288	23.8285	21.4305	28.0965
774.65	26.7238	22.2598	22.3074	27.6458	23.5783	21.1209	22.8577	27.0028	27.7984	30.504	25.5687	29.2648	36.5486	33.392	31.7095	28.3442	25.3595	27.3534	34.1933	37.8979	23.9294	23.7966	21.4316	28.0806
775.1	26.7235	22.2663	22.2851	27.6583	23.6152	21.1345	22.889	26.9856	27.7422	30.5013	25.5931	29.383	36.6165	33.3795	31.7607	28.3106	25.3056	27.2882	34.245	37.9811	24.0585	23.7552	21.459	28.0476
775.55	26.746	22.2841	22.2762	27.6837	23.6448	21.1343	22.9382	26.9597	27.7137	30.529	25.63	29.4377	36.6414	33.3757	31.7671	28.287	25.3605	27.3331	34.4592	38.202	24.0961	23.7368	21.4587	28.0232
776	26.7829	22.2769	22.2529	27.6977	23.6384	21.1291	22.9662	26.9448	27.7147	30.5429	25.629	29.4955	36.6825	33.3805	31.7906	28.2749	25.4956	27.4382	34.6734	38.3588	24.1141	23.7116	21.5138	27.9563
776.45	26.8331	22.261	22.2651	27.7074	23.6493	21.1199	22.9863	26.952	27.7561	30.5437	25.6131	29.417	36.7341	33.3623	31.8016	28.2647	25.6059	27.5542	34.8321	38.5032	24.1436	23.7394	21.5668	27.9342
776.9	26.873	22.28	22.2587	27.6779	23.6534	21.1141	22.9539	26.9613	27.7891	30.5453	25.5914	29.3016	36.7523	33.3681	31.7848	28.2342	25.699	27.658	34.9201	38.5482	24.1917	23.7835	21.6047	27.954
777.35	26.9129	22.2825	22.238	27.6381	23.6419	21.1423	22.9066	26.9591	27.7841	30.5085	25.5436	29.1991	36.9129	33.3614	31.7692	28.1865	25.7462	27.7045	34.8493	38.4353	24.2478	23.7922	21.6462	28.0146
777.8	26.92	22.301	22.2322	27.6177	23.6543	21.1347	22.8737	26.9563	27.7544	30.4681	25.487	29.0965	37.0822	33.4427	31.7102	28.1386	25.7642	27.7039	34.7833	38.2986	24.301	23.8112	21.5977	28.0766
778.25	26.876	22.2919	22.2517	27.6128	23.6411	21.1141	22.8494	26.9392	27.7894	30.4353	25.4484	29.0312	37.13	33.5842	31.6552	28.1171	25.8186	27.6994	34.7221	38.1341	24.3288	23.8037	21.5879	28.0916
778.7	26.8574	22.2834	22.2926	27.6295	23.6148	21.1005	22.8512	26.9249	27.8583	30.4595	25.3992	28.99	37.2295	33.6549	31.6022	28.1438	25.8674	27.7165	34.7183	37.9438	24.4005	23.7955	21.6052	28.1044
779.15	26.8366	22.2857	22.3315	27.6605	23.5845	21.0432	22.8638	26.9016	27.9387	30.5066	25.3797	28.9814	37.0851	33.7238	31.5502	28.1877	25.8979	27.7223	34.7785	37.7899	24.4366	23.7989	21.6139	28.0819
779.6	26.8154	22.2502	22.3665	27.6704	23.5606	21.0169	22.8579	26.8681	28.0287	30.6001	25.3839	28.974	36.9139	33.632	31.5544	28.2874	25.9112	27.7574	34.8063	37.7573	24.4744	23.7834	21.6538	28.0958
780.05	26.817	22.2745	22.3564	27.6581	23.5273	21.0292	22.8316	26.845	27.9701	30.7354	25.3858	28.9796	36.8106	33.5048	31.5702	28.3711	25.9024	27.8039	34.8426	37.8205	24.539	23.7714	21.6099	28.1182
780.5	26.8284	22.2901	22.3387	27.6577	23.5032	21.0164	22.7959	26.8086	27.8916	30.8149	25.4085	29.0004	36.6729	33.4149	31.617	28.3939	25.8941	27.8366	34.8923	37.9161	24.4542	23.7484	21.5428	28.0865
780.95	26.8538	22.2918	22.329	27.6287	23.5412	21.0334	22.7623	26.7871	27.8236	30.8879	25.4213	29.0031	36.6557	33.3116	31.647	28.4259	25.9021	27.8791	34.9201	37.9352	24.4111	23.7463	21.5028	28.0912
781.4	26.8895	22.313	22.3	27.6044	23.5669	21.0506	22.7666	26.7844	27.7412	30.873	25.4362	28.9962	36.6136	33.3088	31.6554	28.333	25.924	27.8672	34.9622	37.917	24.3893	23.7768	21.4622	28.0764
781.85	26.9218	22.2773	22.2858	27.5921	23.603	21.0495	22.7967	26.78	27.7235	30.8184	25.4624	29.0215	36.5782	33.2992	31.678	28.2447	25.9466	27.8435	34.9918	37.8683	24.3555	23.8018	21.4823	28.0628
782.3	26.9234	22.2601	22.2582	27.5677	23.6354	21.0831	22.8167	26.7927	27.7108	30.7419	25.4467	28.9971	36.5409	33.2782	31.6573	28.1616	25.9624	27.8273	35.0004	37.9008	24.4388	23.8435	21.4932	28.0973
782.75	26.8922	22.2569	22.2273	27.5664	23.612	21.0913	22.8318	26.7927	27.7147	30.6518	25.3754	28.9894	36.5142	33.2686	31.6596	28.0631	25.931	27.8477	35.0367	38.0471	24.498	23.8616	21.4933	28.0795
783.2	26.9455	22.2528	22.2151	27.5815	23.5909	21.1044	22.8229	26.7798	27.7357	30.5929	25.2767	28.9795	36.5419	33.2074	31.6308	28.0483	25.8761	27.9083	35.0884	38.1264	24.5142	23.8594	21.5011	28.0652
783.65	27.0013	22.2623	22.1926	27.5991	23.5853	21.1148	22.7895	26.764	27.7565	30.56	25.1538	28.9607	36.5926	33.1558	31.5724	28.0156	25.9029	27.923	35.1362	38.1178	24.5519	23.9624	21.4891	28.0411
784.1	27.0823	22.2535	22.1804	27.5987	23.5834	21.0878	22.7943	26.76	27.7729	30.5506	25.1161	28.9834	36.6519	33.1319	31.5625	28.0134	25.9638	27.9225	35.1783	37.9926	24.523	24.0631	21.5262	27.9798
784.55	27.186	22.2383	22.1791	27.5953	23.5961	21.0896	22.7818	26.7736	27.7582	30.5566	25.1676	28.9479	36.67	33.1271	31.5403	28.0125	26.0786	27.8477	35.207	37.8377	24.5014	24.1825	21.571	27.9451
785	27.1182	22.244	22.1778	27.5679	23.6119	21.0703	22.7689	26.7784	27.7436	30.5662	25.232	28.9191	36.715	33.1797	31.5466	27.9542	26.2101	27.7854	35.2213	37.7133	24.5444	24.2841	21.624	27.8869
785.45	27.0569	22.2462	22.1838	27.5381	23.6315	21.0523	22.7763	26.7716	27.7486	30.5419	25.316	28.8616	36.7504	33.237	31.5692	27.9228	26.2279	27.8373	35.2137	37.6847	24.5412	24.2331	21.69	27.8905
785.9	26.9721	22.2375	22.2174	27.5315	23.6603	21.0741	22.76	26.7289	27.7684	30.5184	25.3417	28.7844	36.7475	33.2667	31.5531	27.8846	26.1945	27.885	35.1878	37.764	24.5808	24.1854	21.6873	27.8922
786.35	26.8821	22.2543	22.2359	27.514	23.6716	21.0878	22.7648	26.6808	27.8101	30.4902	25.3407	28.7661	36.8326	33.2294	31.5323	27.8375	26.1888	27.9478	35.1869	37.8233	24.5794	24.1254	21.6686	27.8991
786.8	26.8779	22.2517	22.2492	27.5141	23.7205	21.11	22.7774	26.6623	27.8156	30.439	25.3409	28.7295	36.7829	33.0754	31.4936	27.8495	26.2129	27.98	35.1792	37.8769	24.5193	24.0651	21.6189	27.9379
787.25	26.8704	22.2681	22.2594	27.5199	23.7585	21.1337	22.7955	26.6605	27.703	30.3978	25.3166	28.6877	36.692	32.887	31.4269	27.8548	26.2826	27.9546	35.2414	37.9438	24.4868	24.0523	21.5577	27.9055
787.7	26.8251	22.3029	22.2213	27.5109	23.8528	21.1417	22.8106	26.6838	27.5706	30.3707	25.2873	28.6581	36.6949	32.7675	31.3706	27.8615	26.4075	27.9545	35.3284	38.005	24.4327	24.0071	21.5622	27.9586
788.15	26.7785	22.3046	22.1808	27.5068	23.9835	21.14	22.7978	26.707	27.4126	30.3432	25.2555	28.6283	36.627	32.757	31.3462	27.8811	26.4873	27.9981	35.3666	38.0662	24.4405	23.958	21.5526	27.9987
788.6	26.7059	22.3149	22.154	27.4964	24.0379	21.1419	22.7808	26.7079	27.3025	30.3994	25.2245	28.6334	36.6433	32.9234	31.3363	27.9011	26.5191	28.0522	35.4202	38.1819	24.4825	23.9362	21.6047	28.0168
789.05	26.6558	22.3146	22.1438	27.4867	24.1071	21.1323	22.7518	26.719	27.3985	30.4695	25.2092	28.6634	36.6844	33.1481	31.3682	27.9187	26.5494	28.0965	35.3982	38.2202	24.5374	23.9165	21.673	28.0367
789.5	26.7081	22.3218	22.1903	27.4833	24.0419	21.1221	22.7288	26.7303	27.5149	30.514	25.212	28.6845	36.6557	33.2791	31.3938	27.9885	26.5543	28.1115	35.3294	38.2699	24.6109	23.9212	21.6686	27.9407
789.95	26.7646	22.3299	22.2518	27.4904	23.9521	21.1232	22.7483	26.7182	27.6568	30.5657	25.1965	28.7135	36.6328	33.325	31.3953	28.0717	26.5469	28.0938	35.3322	38.3177	24.6474	23.9641	21.7084	27.89
790.4	26.8616	22.3335	22.3077	27.5047	23.9142	21.1246	22.7602	26.7024	27.7806	30.53	25.1766	28.7276	36.6098	33.2686	31.4118	28.1052	26.5676	28.0715	35.3016	38.442	24.6733	23.9801	21.6804	27.865
790.85	26.9404	22.3414	22.3491	27.5099	23.8415	21.1421	22.7554	26.6785	27.8126	30.4906	25.1595	28.7266	36.5964	33.1711	31.3917	28.1385	26.598	28.0629	35.3647	38.6228	24.6734	24.0183	21.6126	27.8878
791.3	26.9575	22.3411	22.3397	27.5116	23.8394	21.1484	22.7584	26.6423	27.8333	30.4895	25.1503	28.7181	36.5878	33.0907	31.4488	28.0518	26.6465	28.0781	35.4805	38.6811	24.648	24.047	21.5943	28.0081
791.75	26.9804	22.3447	22.3248	27.5186	23.8254	21.1076	22.7204	26.6361	27.8217	30.4883	25.1386	28.6879	36.5916	33.0295	31.5067	27.9418	26.7018	28.0956	35.5617	38.7519	24.5863	24.0194	21.539	28.0685
792.2	26.9857	22.3496	22.2953	27.5164	23.7939	21.0641	22.6879	26.6309	27.8119	30.531	25.1071	28.6429	36.584	33.0171	31.5157	27.8395	26.7526	28.1263	35.73	38.6467	24.5099	24.0066	21.5326	28.108
792.65	26.9735	22.3371	22.2711	27.5027	23.7778	21.0091	22.687	26.6274	27.7875	30.568	25.0355	28.611	36.5534	33.02	31.5471	27.741	26.7963	28.1627	35.8276	38.5176	24.4669	23.993	21.5682	28.1035
793.1	26.9632	22.2846	22.2637	27.4973	23.7574	20.9822	22.6682	26.6269	27.7623	30.562	24.9354	28.6072	36.519	33.0468	31.4496	27.7081	26.8124	28.2174	35.8716	38.442	24.457	23.9769	21.6009	28.0278
793.55	26.9483	22.2474	22.2492	27.4742	23.7763	21.043	22.6713	26.5937	27.7763	30.5583	24.8635	28.5978	36.5505	33.1032	31.3541	27.6798	26.8301	28.2494	35.8687	38.3971	24.5456	23.9762	21.6489	27.975
794	26.9436	22.2198	22.2404	27.4814	23.7878	21.0866	22.6613	26.5425	27.8041	30.5244	24.866	28.6199	36.6031	33.1242	31.3003	27.6817	26.8514	28.252	35.7511	38.3846	24.6234	24.009	21.6705	27.9201
794.45	26.9652	22.23	22.218	27.5263	23.8161	21.1394	22.629	26.4694	27.8202	30.4827	24.9498	28.6183	36.8154	33.1185	31.2327	27.6912	26.8763	28.2093	35.6029	38.3512	24.6583	24.025	21.67	27.9068
794.9	27.0091	22.2443	22.1943	27.5791	23.8368	21.1538	22.6082	26.3965	27.8253	30.4717	25.0405	28.572	37.0526	33.1299	31.2122	27.6925	26.928	28.1269	35.4814	38.311	24.6783	24.0789	21.6597	27.9327
795.35	27.0513	22.2397	22.1785	27.6329	23.8128	21.1195	22.5905	26.381	27.8181	30.4574	25.115	28.527	37.1358	33.128	31.1877	27.704	27.0117	28.1092	35.3303	38.2326	24.6537	24.1281	21.6573	27.991
795.8	27.0955	22.2223	22.175	27.6386	23.7949	21.1102	22.5981	26.4184	27.8012	30.4654	25.1223	28.5309	37.2228	33.1099	31.1493	27.6889	27.0679	28.1337	35.2423	38.2297	24.658	24.1231	21.6531	28.0517
796.25	27.1112	22.1619	22.1786	27.619	23.7494	21.0818	22.6069	26.4693	27.8097	30.5028	25.0938	28.585	37.0134	33.0621	31.1149	27.6347	27.1089	28.1916	35.2854	38.2508	24.6878	24.1299	21.6726	28.0509
796.7	27.0876	22.1824	22.1942	27.5837	23.7242	21.0841	22.6121	26.5233	27.807	30.5294	25.072	28.6643	36.7762	32.8727	31.0992	27.5796	27.109	28.2523	35.3743	38.3301	24.7069	24.1066	21.6957	28.0341
797.15	27.0575	22.2169	22.2115	27.5538	23.737	21.1003	22.6057	26.5411	27.8032	30.5778	25.0689	28.7542	36.6356	32.6614	31.1038	27.5105	27.0764	28.3143	35.5981	38.4133	24.7165	24.1195	21.7078	27.9211
797.6	27.0085	22.2453	22.2192	27.5454	23.772	21.1224	22.5945	26.5278	27.7643	30.6231	25.0868	28.7045	36.4798	32.4711	31.1252	27.4678	27.0751	28.3738	35.8085	38.4611	24.7153	24.1642	21.7237	27.8299
798.05	26.9826	22.3063	22.222	27.5432	23.8249	21.1698	22.5987	26.5088	27.7129	30.6546	25.1007	28.6334	36.4931	32.3735	31.1551	27.4574	27.0947	28.4411	35.8572	38.5701	24.727	24.2034	21.7283	27.7901
798.5	27.0286	22.3215	22.201	27.5501	23.8665	21.1871	22.5967	26.4962	27.7289	30.6815	25.1243	28.577	36.5467	32.4979	31.1805	27.4899	27.1381	28.5344	35.905	38.6858	24.7623	24.2427	21.7337	27.7744
798.95	27.0761	22.3456	22.1719	27.5597	23.9029	21.1883	22.6032	26.4829	27.7199	30.6506	25.1108	28.51	36.605	32.6231	31.1685	27.5432	27.1869	28.5573	35.8907	38.8025	24.7985	24.2378	21.7113	27.8651
799.4	27.1258	22.3854	22.1367	27.5591	23.9208	21.1815	22.5911	26.4771	27.7495	30.6278	25.0944	28.5296	36.6748	32.7541	31.1348	27.6493	27.2139	28.5411	35.8764	38.793	24.8736	24.2169	21.6769	27.9161
799.85	27.1726	22.4004	22.1264	27.5492	23.9336	21.1609	22.5723	26.4792	27.7697	30.6003	25.0685	28.5404	36.7188	32.8545	31.1077	27.7478	27.214	28.5112	35.9481	38.6457	24.8981	24.1835	21.6378	27.968
800.3	27.1312	22.4111	22.1309	27.5321	23.9556	21.1774	22.561	26.4555	27.7385	30.5674	25.0299	28.5457	36.7408	32.8555	31.106	27.7789	27.2003	28.4552	35.9653	38.3971	24.9022	24.1443	21.6092	27.994
800.75	27.0921	22.3903	22.1535	27.5132	23.9636	21.1867	22.5366	26.4196	27.7283	30.5595	25.0169	28.5476	36.7332	32.8727	31.1317	27.7953	27.1486	28.4691	35.9624	38.1743	24.8965	24.1107	21.6095	27.9673
801.2	27.0573	22.3744	22.1897	27.512	23.9726	21.1734	22.543	26.3833	27.7051	30.5262	25.0206	28.5285	36.6758	32.8765	31.1488	27.6881	27.0892	28.4963	35.9605	38.137	24.8222	24.0922	21.5932	27.9782
801.65	27.0348	22.3532	22.2014	27.5207	23.9903	21.1727	22.5442	26.3483	27.7293	30.4805	25.0385	28.4862	36.6155	32.8622	31.1721	27.5875	27.055	28.5211	35.9232	38.1848	24.7818	24.0782	21.5718	27.9468
802.1	27.0588	22.3447	22.2089	27.5244	23.9746	21.1492	22.5409	26.3312	27.7526	30.4616	25.0311	28.4476	36.5859	32.8546	31.1429	27.5149	27.0329	28.5897	35.8448	38.312	24.7594	24.0693	21.5177	27.948
802.55	27.0867	22.3554	22.1839	27.5224	23.9543	21.1391	22.5628	26.3489	27.7608	30.4548	24.9909	28.4191	36.561	32.8546	31.0997	27.4367	27.1067	28.5963	35.7549	38.3827	24.7686	24.0996	21.4523	27.966
803	27.1302	22.3311	22.14	27.4978	23.9365	21.1493	22.5475	26.3593	27.7908	30.4679	24.9224	28.4015	36.7418	32.889	31.0865	27.4141	27.2315	28.6253	35.6727	38.3521	24.8174	24.1093	21.4718	27.9809
803.45	27.1477	22.3383	22.1088	27.4592	23.9087	21.1467	22.5329	26.3728	27.7931	30.4959	24.8317	28.4091	36.9914	32.9301	31.0401	27.3804	27.3543	28.6335	35.6841	38.3148	24.8675	24.1288	21.5018	28.0459
803.9	27.1333	22.335	22.0886	27.4221	23.8984	21.1488	22.5246	26.4097	27.8083	30.4899	24.8109	28.3831	37.1501	32.9569	31.0275	27.3677	27.4689	28.6445	35.8295	38.267	24.9267	24.1625	21.5577	28.0607
804.35	27.1216	22.3386	22.0806	27.3905	23.9013	21.1416	22.4989	26.401	27.8568	30.4714	24.8527	28.3424	37.3251	32.9683	31.0274	27.3527	27.4948	28.6939	36.0332	38.3024	24.9679	24.1602	21.636	28.0671
804.8	27.082	22.3748	22.0625	27.388	23.9039	21.1197	22.5042	26.3919	27.8854	30.4355	24.9053	28.3037	37.1893	32.9186	31.0069	27.362	27.4775	28.7799	36.2684	38.4143	24.9705	24.1688	21.661	28.0564
805.25	27.0525	22.4052	22.0486	27.4031	23.9259	21.0877	22.5203	26.3754	27.869	30.4046	24.9879	28.2729	36.9531	32.8947	30.9944	27.3743	27.4766	28.9674	36.4128	38.5214	24.9686	24.1985	21.6686	28.0161
805.7	27.0575	22.4167	22.0417	27.4208	23.9825	21.0632	22.5395	26.333	27.8523	30.4065	25.0168	28.2542	36.7915	32.8737	30.9687	27.364	27.5358	29.0587	36.5103	38.5482	24.9146	24.1918	21.6532	27.998
806.15	27.0519	22.4085	22.0527	27.4238	24.0095	21.0674	22.5655	26.3259	27.7972	30.4306	24.99	28.2015	36.6117	32.9416	30.9454	27.3667	27.6474	29.1034	36.5821	38.486	24.8419	24.2117	21.6292	27.9808
806.6	27.0614	22.3952	22.1289	27.4015	24.0125	21.0792	22.5722	26.3237	27.7407	30.4588	24.9638	28.1169	36.5773	33.0678	30.9108	27.3492	27.8034	29.0456	36.6031	38.3732	24.7686	24.2251	21.6179	27.9826
807.05	27.0678	22.3804	22.1807	27.3716	23.9816	21.1549	22.5581	26.3249	27.7408	30.4376	24.928	28.0175	36.5993	33.148	30.903	27.3582	27.9083	28.8591	36.5926	38.2584	24.7012	24.22	21.6093	27.9818
807.5	27.0621	22.3934	22.2144	27.3441	23.9196	21.2226	22.5382	26.3133	27.7469	30.3963	24.904	27.9622	36.606	33.2168	30.9043	27.3406	27.9333	28.7348	36.5256	38.2278	24.6793	24.2458	21.6384	27.962
807.95	27.0667	22.4243	22.2354	27.3365	23.895	21.2435	22.5065	26.2929	27.7725	30.3772	24.9173	28.0093	36.6203	33.1143	30.8923	27.3297	27.971	28.672	36.4415	38.2651	24.669	24.2587	21.652	27.9685
808.4	27.0877	22.4452	22.1893	27.3434	23.8899	21.2664	22.4496	26.2617	27.7892	30.4075	24.9198	28.0866	36.6299	32.9823	30.9217	27.319	27.9832	28.6694	36.3726	38.3005	24.7894	24.2864	21.6394	27.9567
808.85	27.1371	22.446	22.1656	27.3238	23.8958	21.2133	22.4162	26.2261	27.7704	30.5175	24.8895	28.1761	36.6127	32.8648	30.9251	27.2862	28.0171	28.7247	36.3631	38.3225	24.9087	24.2711	21.6663	27.9729
809.3	27.1903	22.4342	22.1524	27.3237	23.915	21.1587	22.383	26.2158	27.735	30.6182	24.8787	28.2061	36.5945	32.7654	30.912	27.3061	28.0755	28.8019	36.4023	38.4066	25.0036	24.2048	21.6746	28.0136
809.75	27.205	22.412	22.1344	27.3039	23.927	21.1388	22.354	26.1978	27.7061	30.6482	24.8505	28.1775	36.5955	32.7569	30.9098	27.3083	28.1393	28.8553	36.43	38.4248	25.1302	24.1371	21.7165	27.9903
810.2	27.2078	22.398	22.1508	27.2826	23.9628	21.1259	22.3788	26.1883	27.6832	30.6304	24.8303	28.1391	36.5888	32.7245	30.895	27.2945	28.1761	28.8801	36.4386	38.4487	25.1461	24.0591	21.7795	27.9719
810.65	27.1611	22.3919	22.1494	27.3217	24.0068	21.1379	22.3881	26.1758	27.6906	30.5454	24.8455	28.0773	36.6519	32.6901	30.8923	27.256	28.3079	28.9272	36.4922	38.4975	25.1772	24.0288	21.7922	27.9212
811.1	27.1127	22.3902	22.1513	27.3319	24.0631	21.1426	22.403	26.1827	27.6989	30.4702	24.8454	28.0656	36.6844	32.6681	30.8792	27.1968	28.4892	28.951	36.5189	38.4181	25.2493	24.0629	21.7888	27.8879
811.55	27.1406	22.4017	22.1786	27.3735	24.131	21.1238	22.4257	26.1983	27.7165	30.4299	24.8357	28.0641	36.7972	32.6289	30.8831	27.1422	28.5865	28.9832	36.5849	38.4277	25.2849	24.0686	21.7393	27.8902
812	27.1436	22.4315	22.1999	27.4046	24.1688	21.1075	22.4448	26.2678	27.7577	30.3995	24.8209	28.066	36.9273	32.626	30.8624	27.0856	28.6801	29.0355	36.6729	38.4497	25.3416	24.0896	21.7334	27.8874
812.45	27.1758	22.4859	22.23	27.3998	24.206	21.0881	22.4736	26.3469	27.8007	30.4231	24.7377	28.0893	36.9579	32.6576	30.8328	27.0604	28.6427	29.0363	36.7226	38.4755	25.3671	24.1396	21.7482	27.9244
812.9	27.2185	22.5367	22.227	27.4067	24.1959	21.085	22.4886	26.3792	27.8377	30.4477	24.6256	28.071	37.0382	32.6662	30.8508	27.0302	28.5428	29.0397	36.7896	38.5424	25.3296	24.1923	21.792	27.8958
813.35	27.2247	22.5664	22.2022	27.3891	24.1593	21.1329	22.4847	26.4095	27.8327	30.4554	24.5313	28.0386	36.9282	32.7054	30.8126	27.0026	28.4943	29.0145	36.8642	38.5778	25.3493	24.2799	21.8777	27.9068
813.8	27.2613	22.5503	22.1779	27.3904	24.1339	21.1762	22.4667	26.3356	27.7938	30.4553	24.4605	28.0124	36.8192	32.7675	30.7686	26.9989	28.5162	29.0391	36.9522	38.5979	25.3506	24.3452	21.8411	27.9374
814.25	27.2787	22.5012	22.1628	27.3875	24.1134	21.1928	22.4472	26.2284	27.7506	30.4423	24.5424	27.9869	36.7465	32.7799	30.7411	26.9914	28.587	29.0994	36.9799	38.7088	25.3555	24.3487	21.8098	27.9126
814.7	27.2803	22.4629	22.182	27.4006	24.1136	21.2021	22.439	26.1393	27.7297	30.4411	24.6636	27.9855	36.6978	32.7723	30.6723	27.0115	28.6691	29.2707	36.9809	38.8857	25.4218	24.3319	21.7725	27.9782
815.15	27.2563	22.4349	22.2021	27.4165	24.124	21.1504	22.467	26.0522	27.818	30.4561	24.7727	27.9832	36.7599	32.6508	30.6417	27.0425	28.7421	29.4738	36.9493	39.0158	25.393	24.3189	21.7003	27.9584
815.6	27.2215	22.4261	22.2138	27.4049	24.1336	21.0931	22.4948	26.0149	27.9258	30.4998	24.8564	27.9592	36.8154	32.473	30.6376	27.0736	28.7544	29.5709	36.9024	39.1659	25.3787	24.3297	21.7157	27.9284
816.05	27.2259	22.4329	22.2219	27.4069	24.1377	21.0776	22.491	26.0176	27.9951	30.5217	24.833	27.9407	36.8862	32.3133	30.6045	27.0997	28.7516	29.6527	36.8699	39.0722	25.3939	24.3626	21.7248	27.9515
816.5	27.2422	22.4533	22.2107	27.3627	24.1515	21.061	22.4792	26.0292	28.0261	30.5778	24.7962	27.9039	36.8938	32.233	30.6004	27.0854	28.759	29.495	36.8718	38.9374	25.3421	24.3988	21.7157	27.9602
816.95	27.2853	22.4824	22.2005	27.3423	24.1589	21.0599	22.3901	26.0395	27.9096	30.654	24.7599	27.8923	36.8546	32.3382	30.5757	27.0474	28.7797	29.3277	36.867	38.8102	25.3697	24.4141	21.7415	28.0589
817.4	27.3252	22.5341	22.2029	27.3532	24.1694	21.0597	22.2875	26.0457	27.7945	30.6975	24.7431	27.9321	36.8173	32.4873	30.5589	27.0058	28.8162	29.2303	36.8575	38.6581	25.4018	24.3921	21.7386	28.1216
817.85	27.3509	22.5773	22.1936	27.347	24.1824	21.0599	22.2292	26.0595	27.7081	30.7537	24.7345	27.9419	36.7705	32.6604	30.552	26.9476	28.8861	29.1562	36.9139	38.7079	25.4181	24.3468	21.7442	28.1483
818.3	27.3445	22.59	22.1876	27.379	24.2323	21.071	22.1919	26.0505	27.674	30.7073	24.7215	27.9623	36.7246	32.7723	30.5332	26.9345	29.0283	29.2097	36.9445	38.7595	25.456	24.2993	21.7635	28.1104
818.75	27.3256	22.595	22.1709	27.3813	24.2811	21.0981	22.2629	26.0343	27.6888	30.6612	24.7207	27.9572	36.7274	32.7914	30.5539	26.9241	29.1656	29.2586	36.9789	38.7939	25.4368	24.2772	21.7608	28.0302
819.2	27.3099	22.5785	22.1409	27.3704	24.2832	21.1247	22.3505	26.0321	27.691	30.6118	24.6938	27.9145	36.7867	32.7886	30.5475	26.9924	29.2749	29.3009	37.0344	38.8408	25.4072	24.2787	21.7737	28.004
819.65	27.2703	22.5705	22.1526	27.3781	24.2755	21.1457	22.4173	26.0187	27.72	30.5591	24.6745	27.9006	36.8374	32.757	30.5382	27.1104	29.355	29.3112	37.0583	38.7519	25.4197	24.2653	21.7753	27.9835
820.1	27.2797	22.5633	22.1702	27.3666	24.1893	21.1593	22.4517	26.0115	27.7275	30.5862	24.6574	27.8988	36.9675	32.735	30.5591	27.1634	29.3097	29.307	37.108	38.6122	25.4736	24.2471	21.7781	28.0395
820.55	27.2343	22.5589	22.1958	27.3581	24.1007	21.1791	22.4335	25.9943	27.7465	30.5763	24.6298	27.9022	37.0908	32.7159	30.5488	27.2391	29.2641	29.295	37.174	38.5157	25.5392	24.2081	21.7664	28.0921
821	27.1974	22.5695	22.22	27.3453	24.0959	21.1992	22.3993	25.9727	27.7761	30.5957	24.6291	27.9138	37.1004	32.6815	30.5544	27.1475	29.289	29.2655	37.217	38.4315	25.6013	24.163	21.7531	28.1406
821.45	27.1757	22.5811	22.1722	27.3378	24.1095	21.2125	22.3673	25.9374	27.7668	30.6135	24.629	27.9021	37.1329	32.6556	30.5731	27.0061	29.3092	29.272	37.2314	38.4611	25.5777	24.2139	21.7345	28.2186
821.9	27.0993	22.5821	22.1184	27.3594	24.1603	21.1665	22.3575	25.9111	27.753	30.5966	24.6079	27.8746	37.0679	32.6107	30.5281	26.9047	29.3733	29.3188	37.2113	38.5788	25.6265	24.2367	21.6981	28.1981
822.35	27.1653	22.5764	22.0781	27.3821	24.2456	21.0864	22.3438	25.9111	27.7582	30.5967	24.6031	27.851	36.9617	32.5657	30.4948	26.7918	29.4627	29.3866	37.0373	38.6945	25.7069	24.2728	21.6518	28.1751
822.8	27.2219	22.5607	22.052	27.4147	24.2892	21.0129	22.3414	25.8998	27.7587	30.5663	24.5834	27.8018	36.9187	32.5418	30.4647	26.7676	29.505	29.4534	36.8345	38.7155	25.8165	24.3219	21.6179	28.1044
823.25	27.2737	22.5379	22.0719	27.4232	24.3171	20.9445	22.3613	25.8908	27.7727	30.5451	24.5443	27.7611	36.8756	32.5112	30.4468	26.7742	29.5617	29.4776	36.6672	38.6973	25.9382	24.3175	21.606	28.0045
823.7	27.3813	22.5497	22.1151	27.3893	24.3509	20.9764	22.3738	25.887	27.7504	30.548	24.5594	27.725	36.8661	32.5313	30.4752	26.7813	29.6169	29.4601	36.5448	38.6036	25.8987	24.3605	21.5967	27.9862
824.15	27.4002	22.5731	22.1348	27.3809	24.3385	21.0392	22.4092	25.8873	27.6043	30.5514	24.5516	27.6852	36.8871	32.5552	30.5055	26.7729	29.6289	29.4284	36.716	38.5376	25.8203	24.3799	21.6536	27.9945
824.6	27.4165	22.5925	22.1391	27.3617	24.3264	21.1064	22.4467	25.8932	27.4552	30.567	24.551	27.6805	36.8909	32.6662	30.5159	26.7525	29.6712	29.5632	36.9407	38.5807	25.6904	24.3927	21.6833	28.0476
825.05	27.4863	22.6227	22.1324	27.351	24.3148	21.1613	22.4711	25.8938	27.2731	30.5447	24.5832	27.6944	36.845	32.8106	30.5096	26.7278	29.7261	29.7291	37.1864	38.5807	25.5822	24.4275	21.7127	28.0784
825.5	27.5309	22.6382	22.1049	27.369	24.3018	21.184	22.5063	25.8909	27.1695	30.4262	24.5774	27.6854	36.7791	32.8844	30.4726	26.7043	29.797	29.9144	37.4054	38.6161	25.5136	24.4338	21.7457	28.0561
825.95	27.5733	22.6532	22.098	27.3507	24.3132	21.1906	22.5137	25.8749	27.2802	30.3052	24.5723	27.7296	36.7303	32.9572	30.4292	26.6999	29.8917	30.1086	37.4991	38.6562	25.4996	24.4533	21.7366	28.0047
826.4	27.6301	22.6758	22.0738	27.3364	24.3035	21.1864	22.5145	25.8633	27.41	30.1958	24.5561	27.7476	36.6978	32.8561	30.415	26.6987	29.9649	30.0052	37.6053	38.7222	25.4912	24.4683	21.7599	27.9482
826.85	27.5835	22.6941	22.0451	27.3274	24.2753	21.1959	22.4937	25.866	27.6022	30.162	24.5218	27.8355	36.7313	32.7281	30.412	26.6919	30.06	29.9063	37.6684	38.8714	25.503	24.4558	21.7565	27.9523
827.3	27.5372	22.7035	22.0225	27.3125	24.2313	21.1979	22.4697	25.8634	27.7399	30.2932	24.5009	27.9778	36.7714	32.6237	30.4247	26.6808	30.1653	29.8261	37.721	38.9632	25.5307	24.4602	21.7829	27.9968
827.75	27.5048	22.6921	21.9904	27.3038	24.1941	21.2079	22.4514	25.8486	27.7599	30.4293	24.4961	28.0196	36.8489	32.4954	30.4347	26.6393	30.2334	29.7528	37.7458	38.9144	25.5257	24.4809	21.8256	28.0371
828.2	27.4664	22.6673	21.9735	27.2863	24.1848	21.2129	22.4338	25.8309	27.7711	30.5704	24.5207	28.0824	36.9225	32.4416	30.4243	26.6245	30.2439	29.8362	37.742	38.726	25.5825	24.4707	21.8465	28.0541
828.65	27.5036	22.6311	21.9688	27.2652	24.2361	21.2132	22.4192	25.814	27.7479	30.6357	24.5444	27.9737	36.9588	32.3821	30.3974	26.5814	30.1881	29.8803	37.7439	38.4554	25.6027	24.4547	21.8815	28.0037
829.1	27.5555	22.6106	21.945	27.2509	24.3116	21.2306	22.4012	25.7978	27.7455	30.6415	24.5412	27.8223	37.0526	32.3879	30.3901	26.614	30.127	29.9038	37.7344	38.2642	25.6506	24.4282	21.8654	27.9499
829.55	27.6276	22.6189	21.9308	27.2603	24.3852	21.2514	22.3854	25.7457	27.7712	30.6548	24.5098	27.7382	37.0076	32.4197	30.3675	26.7097	30.1434	29.9249	37.7765	38.3397	25.6711	24.371	21.828	27.9073
830	27.6569	22.6425	21.9669	27.2807	24.4657	21.305	22.363	25.6951	27.7699	30.65	24.4564	27.6359	36.9321	32.464	30.37	26.7696	30.2627	29.9247	37.7965	38.5921	25.6731	24.3904	21.7955	27.8865
830.45	27.6456	22.6833	21.9966	27.3057	24.4996	21.3466	22.3557	25.6304	27.7676	30.6758	24.4165	27.6108	36.8556	32.5159	30.3879	26.8542	30.4148	29.9615	37.8023	38.9202	25.7268	24.4004	21.762	27.9233
830.9	27.6017	22.7053	22.0417	27.3264	24.5293	21.3406	22.334	25.586	27.746	30.6719	24.4026	27.5948	36.7207	32.5172	30.4391	26.7831	30.5886	29.9732	37.9027	39.2137	25.7697	24.4096	21.7662	27.9473
831.35	27.5164	22.6975	22.0592	27.3211	24.5502	21.331	22.3179	25.6233	27.7135	30.6397	24.4271	27.5557	36.7102	32.5254	30.5318	26.6712	30.6961	29.9744	37.9142	39.2979	25.842	24.45	21.7804	28.0111
831.8	27.5555	22.6699	22.0275	27.311	24.5444	21.2691	22.3236	25.6551	27.7107	30.5826	24.4336	27.5523	36.7599	32.524	30.5822	26.5794	30.7334	29.9813	37.9314	39.2854	25.8807	24.4429	21.7775	28.0394
832.25	27.6221	22.6268	22.0056	27.2925	24.5561	21.2339	22.3166	25.7068	27.7022	30.5294	24.4365	27.5745	36.824	32.5342	30.6054	26.4906	30.7911	29.9729	38.0318	39.2233	25.8958	24.4667	21.7611	28.0291
832.7	27.6942	22.6005	22.0048	27.2601	24.5576	21.2391	22.3384	25.7271	27.7595	30.4888	24.4368	27.6064	36.8957	32.5472	30.5209	26.4785	30.8101	29.9869	37.9964	39.1449	25.8936	24.5035	21.7398	28.0088
833.15	27.7851	22.5835	22.0436	27.2281	24.5573	21.2253	22.3476	25.7214	27.8014	30.4645	24.4828	27.6483	36.9024	32.5403	30.4094	26.448	30.8635	29.9181	37.9562	39.0569	25.8732	24.5225	21.7172	27.9019
833.6	27.7406	22.5396	22.0986	27.1996	24.5819	21.2385	22.3867	25.7094	27.9202	30.4579	24.5761	27.6511	36.8766	32.5286	30.3106	26.4092	30.9595	29.8973	37.9304	38.9613	25.8696	24.551	21.7254	27.8508
834.05	27.6878	22.5049	22.1298	27.1764	24.6124	21.2088	22.4517	25.6733	28.0565	30.4533	24.6538	27.6335	36.8575	32.4873	30.2411	26.3666	31.0258	29.8832	37.8118	38.8809	25.8526	24.5668	21.7552	27.8364
834.5	27.6554	22.4603	22.1194	27.1693	24.6298	21.1591	22.4865	25.661	28.0783	30.4215	24.7284	27.6189	36.8565	32.402	30.234	26.3272	31.0858	29.9196	37.7803	38.8255	25.8515	24.5743	21.7854	27.8609
834.95	27.6082	22.4346	22.0636	27.1894	24.6984	21.1424	22.5352	25.6547	28.1043	30.3954	24.6725	27.5952	36.8651	32.3401	30.221	26.3288	31.1381	30.0986	37.8291	38.8102	25.8495	24.5666	21.8254	27.9883
835.4	27.6176	22.4941	21.9938	27.2199	24.7577	21.1245	22.4889	25.661	27.961	30.3993	24.5596	27.5771	36.8565	32.3079	30.221	26.333	31.2038	30.1948	37.8663	38.7366	25.8273	24.5367	21.8284	28.0764
835.85	27.6252	22.5353	21.952	27.2503	24.7804	21.1621	22.4162	25.6837	27.8124	30.4025	24.4548	27.5885	36.7829	32.2724	30.2098	26.3464	31.2881	30.2688	37.9103	38.6782	25.8258	24.5084	21.8356	28.1356
836.3	27.6024	22.5916	21.9308	27.2782	24.8285	21.1975	22.363	25.6767	27.7173	30.4455	24.3703	27.5845	36.6404	32.3001	30.1825	26.3584	31.4018	30.2621	37.9017	38.6017	25.8005	24.4599	21.8258	28.1405
836.75	27.6037	22.6185	21.9569	27.2955	24.7739	21.2076	22.2924	25.6526	27.6291	30.4889	24.3522	27.63	36.5534	32.3083	30.1783	26.3406	31.5741	30.1879	37.873	38.5357	25.7458	24.4719	21.783	28.1167
837.2	27.5881	22.6128	21.9996	27.2839	24.7128	21.1964	22.2802	25.629	27.6406	30.5119	24.3527	27.6977	36.4836	32.3051	30.1837	26.3228	31.6891	30.1479	37.895	38.66	25.7108	24.5013	21.7577	28.0866
837.65	27.5886	22.6431	22.0202	27.2643	24.6677	21.1105	22.2763	25.5768	27.6426	30.529	24.3562	27.7163	36.5113	32.349	30.1743	26.2885	31.7879	30.1768	37.9486	38.7337	25.6382	24.5484	21.7202	28.0517
838.1	27.6383	22.656	22.0444	27.2372	24.6117	21.0332	22.2501	25.5824	27.6683	30.5271	24.3262	27.7336	36.6796	32.3615	30.1849	26.2657	31.8644	30.2267	38.1236	38.8044	25.5977	24.6425	21.7331	28.0578
838.55	27.6666	22.6928	22.0472	27.206	24.61	20.9727	22.2331	25.596	27.6917	30.5262	24.3025	27.6556	36.7609	32.372	30.193	26.2585	31.846	30.2903	38.2928	38.9039	25.7238	24.6657	21.778	27.9863
839	27.7019	22.7243	22.0326	27.1478	24.6124	20.9627	22.2012	25.6098	27.6779	30.5395	24.3045	27.5485	36.8489	32.3797	30.1641	26.2359	31.8661	30.3469	38.376	38.8226	25.847	24.767	21.8312	27.9653
839.45	27.7223	22.7273	22.0308	27.1001	24.6172	21.0454	22.1858	25.6787	27.6995	30.5516	24.2952	27.4545	36.889	32.3417	30.1385	26.2358	31.9156	30.3336	38.4812	38.8044	26.0243	24.8331	21.888	27.9899
839.9	27.7118	22.738	22.0339	27.0489	24.613	21.1209	22.1965	25.6759	27.6977	30.5624	24.2968	27.3685	36.8393	32.3257	30.0061	26.2063	31.9663	30.361	38.4152	38.8599	26.1805	24.8396	21.8656	27.9937
840.35	27.7217	22.7273	22.0349	26.9896	24.6047	21.1829	22.2194	25.6488	27.726	30.5637	24.2985	27.3245	36.8594	32.3228	29.8619	26.1813	32.0211	30.3699	38.3273	38.9096	26.1854	24.8676	21.8371	28.0864
840.8	27.7252	22.7056	22.038	27.0195	24.5969	21.2089	22.2469	25.6344	27.7776	30.5477	24.2863	27.2973	36.847	32.32	29.7446	26.1991	32.0724	30.4093	38.3426	39.0359	26.1931	24.7434	21.806	28.1323
841.25	27.7272	22.6916	22.0538	27.0464	24.6044	21.1826	22.2413	25.5981	27.7875	30.5561	24.289	27.2872	36.8556	32.3508	29.6731	26.2096	32.0916	30.4899	38.3206	39.1162	26.177	24.6363	21.76	28.137
841.7	27.739	22.6785	22.0726	27.0964	24.6273	21.1817	22.2299	25.6103	27.7913	30.5777	24.273	27.2761	36.8603	32.3454	29.7919	26.2556	32.1346	30.5295	38.3913	39.0846	26.1536	24.5632	21.8245	28.152
842.15	27.7433	22.653	22.0941	27.1653	24.6254	21.1926	22.2253	25.6484	27.7101	30.5906	24.1793	27.2909	36.8565	32.38	29.8993	26.2888	32.2176	30.5968	38.5109	39.0569	26.1751	24.4952	21.8815	28.0997
842.6	27.7736	22.6258	22.1207	27.1902	24.5392	21.2014	22.2374	25.6699	27.5262	30.6235	24.0702	27.3044	36.9034	32.4089	30.0107	26.3036	32.2906	30.6255	38.5443	39.0387	26.2094	24.5044	21.9487	28.0571
843.05	27.7897	22.5911	22.1142	27.2231	24.4365	21.2226	22.269	25.676	27.3501	30.632	23.9579	27.301	36.9196	32.3985	30.0847	26.3169	32.3725	30.5546	38.5826	39.076	26.2278	24.5193	22.0306	28.0168
843.5	27.7828	22.5504	22.0757	27.2353	24.3192	21.2355	22.2945	25.6572	27.2057	30.7085	23.8907	27.2975	37.0114	32.4345	30.0526	26.3108	32.4558	30.5224	38.596	39.1602	26.2299	24.5182	21.9741	27.9825
843.95	27.7775	22.5749	22.0374	27.2159	24.2669	21.2503	22.282	25.6333	27.1591	30.8108	23.9771	27.29	37.0698	32.3784	30.0312	26.3078	32.5563	30.4747	38.5396	39.1382	26.2188	24.5159	21.9313	27.9667
844.4	27.7599	22.6203	21.9878	27.1991	24.3671	21.2717	22.2458	25.5906	27.3116	30.8859	24.0827	27.2976	37.0239	32.3091	29.9892	26.285	32.6506	30.4547	38.531	39.0741	26.2032	24.5194	21.8583	27.987
844.85	27.7535	22.677	21.9737	27.1696	24.4724	21.3003	22.2081	25.5453	27.4661	30.9444	24.1951	27.3205	36.8996	32.3036	29.9381	26.2506	32.7595	30.5905	38.5482	38.9336	26.1912	24.5184	21.795	28.0127
845.3	27.7788	22.7299	21.9612	27.146	24.5966	21.3037	22.1839	25.5108	27.6003	30.8648	24.2671	27.3259	36.6748	32.2831	29.9129	26.2314	32.9026	30.6849	38.5989	38.7958	26.2557	24.5947	21.8026	27.9994
845.75	27.801	22.7632	21.9522	27.1177	24.6729	21.2919	22.1903	25.4774	27.6869	30.7895	24.2414	27.3309	36.4616	32.2953	29.908	26.1923	32.9999	30.7762	38.7691	38.7748	26.3139	24.6996	21.7976	27.9944
846.2	27.8149	22.7957	21.9624	27.0883	24.6895	21.2918	22.2085	25.4517	27.6803	30.7278	24.2152	27.301	36.4099	32.3483	29.9209	26.1702	33.2034	30.8736	38.9986	38.7432	26.3525	24.761	21.8451	27.9375
846.65	27.866	22.8368	21.9396	27.0592	24.7066	21.2546	22.2318	25.3959	27.6773	30.6881	24.1667	27.3498	36.5629	32.3567	29.9769	26.1494	33.4132	30.8951	39.2032	38.7691	26.4135	24.8177	21.8595	27.8737
847.1	27.9218	22.8949	21.9604	27.0427	24.7051	21.2366	22.229	25.325	27.6812	30.7064	24.1477	27.4357	36.7571	32.3661	30.0264	26.1073	33.5228	30.9337	39.382	38.857	26.4203	24.7752	21.8868	27.8545
847.55	27.969	22.9107	21.9712	27.0795	24.7112	21.2381	22.2128	25.2436	27.6986	30.7097	24.1425	27.4956	36.9713	32.3827	30.0623	26.0963	33.6534	30.9979	39.4652	38.9202	26.425	24.7405	21.9274	27.8366
848	28.0152	22.9086	21.9785	27.1141	24.7066	21.2391	22.1996	25.1981	27.7236	30.6998	24.1275	27.5738	37.1032	32.3589	30.0986	26.0887	33.6134	31.0484	39.4767	39.0579	26.4362	24.7596	21.925	27.8278
848.45	28.0121	22.8847	22.0078	27.1676	24.7064	21.2725	22.1881	25.233	27.7447	30.6824	24.1401	27.4939	37.1128	32.3391	30.0953	26.0847	33.539	31.0798	39.4977	39.1659	26.4254	24.7815	21.939	27.828
848.9	27.9706	22.8271	22.0176	27.2025	24.7181	21.3034	22.1976	25.2971	27.7556	30.6647	24.1381	27.3765	37.1272	32.3172	30.0736	26.0778	33.5149	31.1063	39.5723	39.187	26.4405	24.8501	21.9251	27.8165
849.35	27.9996	22.8065	22.0349	27.216	24.728	21.3126	22.1992	25.371	27.7638	30.6375	24.125	27.2618	37.1329	32.3125	30.0059	26.0732	33.4688	31.104	39.5896	39.2319	26.4756	24.8473	21.8789	27.8305
849.8	28.0421	22.7769	22.0616	27.2176	24.7718	21.32	22.1382	25.4125	27.7527	30.6391	24.1064	27.1642	37.1272	32.3376	29.9346	26.034	33.4935	31.0954	39.5178	39.2061	26.5603	24.819	21.8184	27.8581
850.25	28.1078	22.7666	22.0715	27.1873	24.8127	21.3123	22.0552	25.4072	27.7435	30.6465	24.0781	27.1417	37.1176	32.3557	29.8548	25.9917	33.5402	31.1191	39.4547	39.253	26.6599	24.7829	21.7509	27.8862
850.7	28.1917	22.81	22.075	27.1695	24.9101	21.288	21.9691	25.3909	27.709	30.6566	24.0673	27.1346	37.1013	32.3816	29.7698	25.9956	33.5985	31.1395	39.3151	39.3352	26.7393	24.7156	21.7022	27.915
851.15	28.1607	22.8254	22.0734	27.1478	25.0299	21.2773	21.9188	25.3685	27.6853	30.6904	24.0972	27.1437	37.0956	32.3891	29.7599	25.9933	33.7181	31.1699	39.2443	39.3754	26.799	24.682	21.6908	27.8888
851.6	28.1306	22.85	22.0442	27.1484	25.0937	21.2585	21.9838	25.3557	27.6807	30.7008	24.1135	27.1249	37.1233	32.3343	29.7541	26.0297	33.8395	31.227	39.2778	39.4069	26.7511	24.6579	21.7044	27.8213
852.05	28.089	22.8597	22.0047	27.1708	25.1494	21.2601	22.0687	25.3686	27.6779	30.6888	24.0348	27.1094	37.2056	32.1934	29.7681	26.0802	33.9734	31.2775	39.2988	39.3753	26.6783	24.6491	21.7827	27.7757
852.5	28.0719	22.8479	21.9707	27.1837	25.0864	21.2914	22.1568	25.3733	27.716	30.5831	23.9305	27.1057	37.2821	32.0042	29.8093	26.0747	34.0929	31.3339	39.3715	39.3304	26.6195	24.6719	21.8647	27.7432
852.95	28.0895	22.8647	21.9489	27.1838	25.0005	21.2905	22.2136	25.3935	27.7077	30.4397	23.7867	27.0941	37.2553	31.8118	29.8058	26.0539	34.1618	31.3178	39.5102	39.3094	26.5685	24.7068	21.9263	27.7669
853.4	28.0759	22.8945	21.9427	27.1733	24.9235	21.2872	22.225	25.4144	27.6718	30.2981	23.7079	27.1088	37.2209	31.6949	29.796	26.0218	34.2325	31.1351	39.6249	39.3706	26.5671	24.736	21.9871	27.8491
853.85	28.0624	22.9262	21.9873	27.1453	24.8516	21.2745	22.2373	25.3992	27.6436	30.1992	23.7885	27.1159	37.1147	31.7606	29.783	25.9851	34.3253	30.9273	39.7531	39.3849	26.5702	24.7754	21.9717	27.8991
854.3	28.0124	22.9394	22.0175	27.1194	24.8471	21.2507	22.2229	25.3972	27.641	30.2797	23.8671	27.1098	37.0019	31.8462	29.7692	25.9753	34.44	30.7345	39.7827	39.3705	26.5536	24.8091	21.9274	27.9321
854.75	27.9848	22.9498	22.0234	27.1058	24.8522	21.2803	22.2123	25.3838	27.6812	30.3785	23.9585	27.1145	37.0889	31.9618	29.772	25.9711	34.5318	30.6646	39.6297	39.3333	26.5287	24.8243	21.8864	27.9214
855.2	27.9902	22.9653	22.0368	27.0972	24.8825	21.31	22.1824	25.3456	27.7537	30.4948	23.9909	27.0818	37.1472	32.0581	29.764	25.9767	34.6542	30.8455	39.5312	39.207	26.5194	24.8364	21.8386	27.8836
855.65	28.0126	22.9892	22.0145	27.1025	24.9151	21.3259	22.1396	25.3231	27.8158	30.6062	23.9609	27.0875	37.2515	32.0671	29.758	25.9691	34.7135	31.0642	39.3466	39.1152	26.5249	24.8102	21.7804	27.8332
856.1	28.053	23.0143	22.0202	27.1181	24.9387	21.3423	22.1194	25.2816	27.8186	30.6456	23.9537	27.0831	37.3796	32.0928	29.7422	25.9588	34.7432	31.2737	39.2883	39.0808	26.5343	24.8222	21.7592	27.7778
856.55	28.0877	23.024	22.0368	27.1337	24.9657	21.3406	22.1064	25.2335	27.7978	30.6964	23.9439	27.1326	37.3586	32.1039	29.7365	25.9533	34.8531	31.4311	39.471	39.054	26.5501	24.8376	21.7471	27.7744
857	28.1112	23.0128	22.0398	27.1457	24.9944	21.3418	22.1186	25.2303	27.7524	30.7284	23.9495	27.2181	37.3519	32.1153	29.7473	25.9242	34.9239	31.5012	39.558	39.099	26.5839	24.8608	21.7239	27.7957
857.45	28.1195	23.047	22.0569	27.1689	25.0234	21.3628	22.1406	25.2324	27.7245	30.7385	23.9504	27.2403	37.327	32.1528	29.7503	25.9274	35.0243	31.5634	39.7655	39.1688	26.614	24.8793	21.7609	27.8659
857.9	28.1052	23.1051	22.0424	27.1826	25.0258	21.3759	22.2134	25.2488	27.7094	30.748	23.9471	27.2919	37.3041	32.202	29.7596	25.9394	35.1486	31.6176	39.9281	39.207	26.6367	24.798	21.7824	27.9664
858.35	28.0844	23.1668	22.0325	27.1897	24.9806	21.3743	22.2726	25.2772	27.7216	30.748	23.9406	27.217	37.3155	32.2387	29.7541	25.9293	35.228	31.6903	39.9472	39.2405	26.6846	24.732	21.7947	28.0081
858.8	28.0705	23.2376	22.0183	27.184	24.9096	21.3735	22.3063	25.3011	27.732	30.7576	23.9521	27.124	37.3337	32.2681	29.7565	25.9512	35.3274	31.7492	40.0132	39.2329	26.6998	24.6693	21.8538	28.0344
859.25	28.0613	23.2115	21.9923	27.165	24.8305	21.3549	22.3377	25.3297	27.6943	30.789	23.9604	27.0505	37.3452	32.2581	29.786	25.9401	35.4221	31.7614	40.0486	39.2424	26.717	24.6434	21.8715	28.0281
859.7	28.0848	23.1497	21.9843	27.1275	24.8108	21.3536	22.2704	25.3427	27.7263	30.7983	23.9505	26.969	37.3385	32.2268	29.8055	25.9066	35.5072	31.7826	40.0945	39.273	26.7169	24.6731	21.8717	27.9713
860.15	28.1505	23.078	21.9834	27.099	24.8828	21.3575	22.2204	25.3423	27.7278	30.8154	23.9507	26.9558	37.3413	32.1998	29.8143	25.9002	35.5751	31.791	40.1815	39.2864	26.6679	24.6907	21.8921	27.9419
860.6	28.2236	23.0064	21.9844	27.1055	24.9713	21.3786	22.182	25.3119	27.7323	30.7861	23.9436	26.9563	37.3844	32.1944	29.7951	25.8421	35.6459	31.7875	40.2752	39.2654	26.6354	24.7047	21.8885	27.8879
861.05	28.3052	22.9717	21.9837	27.1193	25.0785	21.4196	22.1542	25.2738	27.796	30.7495	23.9412	26.9879	37.4513	32.2077	29.7537	25.7825	35.7367	31.8236	40.323	39.2175	26.6183	24.7172	21.9017	27.829
861.5	28.3675	22.9659	21.9819	27.1745	25.1561	21.4807	22.1743	25.2555	27.7573	30.7146	23.9713	26.9937	37.6388	32.2007	29.7088	25.7215	35.8037	31.8581	40.3565	39.1917	26.6685	24.7368	21.9261	27.7724
861.95	28.3637	22.957	21.9758	27.2147	25.1677	21.5426	22.2035	25.2329	27.7353	30.7331	23.9534	26.9939	37.8319	32.1759	29.66	25.6758	35.8993	31.8963	40.3737	39.1678	26.7508	24.7765	21.9166	27.7374
862.4	28.3366	22.9449	21.9217	27.2183	25.1771	21.5677	22.2337	25.2282	27.7063	30.8315	23.9141	26.9843	37.917	32.0819	29.6399	25.674	35.9815	31.9752	40.3067	39.1286	26.8165	24.8439	21.8942	27.7505
862.85	28.3055	22.9553	21.8768	27.2124	25.1822	21.5653	22.2402	25.2132	27.6356	30.909	23.8613	26.9248	37.9792	31.99	29.6052	25.6937	36.0227	32.0378	40.193	39.0703	26.8867	24.8981	21.9152	27.7655
863.3	28.3006	22.965	21.8304	27.1679	25.1985	21.4896	22.2442	25.1827	27.5881	31.0155	23.7643	26.8906	37.8405	31.9754	29.5913	25.7617	36.0485	31.9619	39.9644	38.879	26.9256	24.9352	21.9478	27.8327
863.75	28.3298	23.0334	21.7734	27.13	25.2448	21.4285	22.2323	25.1938	27.5345	30.9948	23.7479	26.8626	37.6799	32.0103	29.6022	25.7946	35.9729	31.88	39.7435	38.7375	26.996	24.9405	21.9948	27.866
864.2	28.3707	23.1014	21.8267	27.1037	25.2732	21.3861	22.1965	25.191	27.5159	30.9443	23.7295	26.8407	37.5862	32.101	29.5951	25.8167	35.884	31.7517	39.6517	38.7853	27.0977	24.8821	22.0426	27.864
864.65	28.4313	23.1542	21.8619	27.0816	25.2861	21.3557	22.1819	25.1861	27.5165	30.8946	23.7238	26.8532	37.5106	32.1648	29.6069	25.8361	35.8113	31.6754	39.7339	38.8542	27.1414	24.8957	21.9923	27.8761
865.1	28.4663	23.212	21.8969	27.0869	25.2675	21.372	22.1569	25.2008	27.5644	30.8183	23.748	26.845	37.4963	32.1775	29.6048	25.7998	35.8524	31.8541	40.0304	39.0904	27.2734	24.936	21.9082	27.8329
865.55	28.5073	23.2026	21.9644	27.0958	25.2549	21.3726	22.1397	25.1747	27.6365	30.8133	23.7375	26.8619	37.5087	32.1664	29.5973	25.7709	36.0886	31.9974	40.3259	39.3065	27.3488	24.9994	21.8236	27.805
866	28.5412	23.2028	21.986	27.1085	25.2734	21.3901	22.1527	25.1646	27.6895	30.7922	23.7528	26.8685	37.503	32.1454	29.5922	25.7433	36.3468	32.1373	40.5841	39.3734	27.4017	25.078	21.7571	27.7905
866.45	28.5198	23.2089	22.0131	27.1121	25.2976	21.4155	22.1508	25.1798	27.7388	30.7793	23.7812	26.9528	37.4886	32.1526	29.5895	25.7062	36.6404	32.2276	40.7619	39.4203	27.5077	25.0291	21.7469	27.7842
866.9	28.5764	23.1799	22.0253	27.0977	25.3574	21.4281	22.1732	25.1877	27.7631	30.7812	23.7998	27.0715	37.4991	32.1518	29.5831	25.6972	36.8441	32.2081	40.8767	39.3887	27.4297	24.954	21.7634	27.8258
867.35	28.6389	23.156	21.9933	27.075	25.3736	21.449	22.1667	25.2028	27.7604	30.7742	23.8214	27.1316	37.4819	32.136	29.5595	25.6807	36.9522	32.2164	40.9838	39.36	27.3577	24.8744	21.803	27.9054
867.8	28.7138	23.1257	21.9412	27.0384	25.3676	21.4329	22.1441	25.1957	27.7346	30.7807	23.8484	27.1854	37.4857	32.1277	29.5347	25.6565	37.0593	32.2394	41.0899	39.3323	27.2936	24.8224	21.8027	27.986
868.25	28.8057	23.0788	21.9117	27.0137	25.3629	21.4155	22.1323	25.167	27.7474	30.8004	23.8554	27.0765	37.501	32.1178	29.5303	25.6214	37.1453	32.2625	41.1406	39.3467	27.2243	24.8299	21.8004	28.0193
868.7	28.7498	23.066	21.9007	27.0044	25.3399	21.3962	22.1048	25.132	27.7473	30.7848	23.8713	26.9395	37.4752	32.119	29.5182	25.6282	37.2515	32.2857	41.1224	39.3486	27.2244	24.8418	21.8143	28.0264
869.15	28.684	23.0819	21.9108	27.0159	25.3457	21.3927	22.1001	25.0951	27.8188	30.7766	23.8825	26.8333	37.5393	32.1563	29.553	25.6307	37.3567	32.3436	41.1425	39.3993	27.2652	24.8535	21.7951	27.9324
869.6	28.6249	23.1071	21.9426	27.032	25.3766	21.422	22.1079	25.0815	27.9294	30.7844	23.8518	26.7547	37.6206	32.1874	29.6068	25.6435	37.437	32.4221	41.1731	39.4805	27.2974	24.8549	21.8075	27.8274
870.05	28.5972	23.1589	21.9608	27.0316	25.4009	21.4319	22.1084	25.0836	27.9568	30.7767	23.8141	26.7707	37.678	32.1863	29.6102	25.6582	37.5221	32.5129	41.1731	39.6154	27.3181	24.8294	21.8253	27.7955
870.5	28.6461	23.1886	21.9755	27.0275	25.4023	21.4719	22.1108	25.078	27.9791	30.7691	23.7988	26.7953	37.8147	32.2219	29.6339	25.5711	37.6206	32.5745	41.1243	39.8391	27.368	24.8112	21.8339	27.7756
870.95	28.6655	23.196	22.0024	26.9994	25.3917	21.4604	22.1125	25.0815	27.8844	30.7189	23.7797	26.8139	37.7956	32.2092	29.5886	25.5433	37.7325	32.6156	41.0105	39.951	27.3786	24.8066	21.857	27.855
871.4	28.6391	23.1852	22.0087	26.9904	25.3732	21.4402	22.1041	25.0789	27.781	30.6231	23.8793	26.8015	37.7392	32.228	29.519	25.5068	37.8912	32.6403	40.8528	40.018	27.2864	24.8071	21.8629	27.9221
871.85	28.5894	23.1521	22.0049	27.0016	25.3786	21.4572	22.0946	25.0591	27.7331	30.5403	24.0194	26.7741	37.7066	32.3	29.4858	25.4939	37.9734	32.7084	40.8547	39.973	27.1801	24.8555	21.8441	27.9403
872.3	28.5571	23.0965	21.9966	27.0034	25.403	21.4454	22.079	25.0611	27.7113	30.5406	24.106	26.7391	37.6454	32.3004	29.4413	25.5211	37.9438	32.803	40.9818	39.8334	27.0756	24.8905	21.824	27.9605
872.75	28.5463	23.0506	21.9563	27.0274	25.4362	21.4598	22.0706	25.0743	27.7391	30.6161	24.1964	26.7159	37.6703	32.3158	29.4418	25.4926	37.873	32.7975	41.1482	39.754	26.9739	24.8866	21.8032	27.8925
873.2	28.5883	23.0102	21.9938	27.0529	25.4544	21.4795	22.0684	25.1423	27.7454	30.7263	24.1205	26.7157	37.7162	32.2629	29.4459	25.4687	37.7879	32.6534	41.3299	39.7502	27.11	24.8458	21.8455	27.8484
873.65	28.64	22.9875	22.0472	27.0846	25.4309	21.4888	22.0541	25.2181	27.7463	30.8294	23.9892	26.7169	37.7506	32.1514	29.4241	25.4357	37.8386	32.4475	41.4093	39.733	27.2645	24.7828	21.907	27.7805
874.1	28.6591	23.0457	22.1209	27.1118	25.4376	21.5095	21.9949	25.2715	27.7239	30.8773	23.8849	26.7217	37.7583	32.0633	29.4079	25.4254	38.0901	32.235	41.4896	39.7301	27.4075	24.7173	21.9648	27.6801
874.55	28.692	23.1106	22.218	27.1248	25.4396	21.5532	21.932	25.2851	27.7066	30.9224	23.7834	26.7287	37.7612	31.9909	29.3745	25.4298	38.3846	32.2071	41.5547	39.7225	27.5612	24.6642	22.025	27.6915
875	28.7122	23.1596	22.1991	27.1259	25.4497	21.5755	21.8615	25.187	27.7158	30.9669	23.7348	26.7118	37.7277	31.9651	29.3568	25.4436	38.6686	32.4528	41.635	39.6565	27.5743	24.6814	21.9979	27.7089
875.45	28.741	23.18	22.1672	27.1006	25.5224	21.5802	21.8271	25.0954	27.7174	31.0201	23.7065	26.6957	37.677	32.0101	29.3525	25.4436	38.879	32.7115	41.7354	39.6268	27.5885	24.6929	21.9822	27.7982
875.9	28.7594	23.1536	22.1033	27.1175	25.5772	21.5792	21.8934	25.0112	27.7343	31.0826	23.6719	26.6766	37.6627	32.0867	29.3373	25.4361	38.9833	32.998	41.7918	39.6861	27.5928	24.7417	21.9621	27.9304
876.35	28.7695	23.1258	22.0212	27.1377	25.6243	21.5535	21.951	24.9695	27.7403	31.105	23.6369	26.6653	37.6627	32.1553	29.3283	25.4354	39.0722	33.1567	41.8244	39.7225	27.5829	24.8015	21.9387	27.9446
876.8	28.7587	23.1367	21.9773	27.1547	25.6588	21.5456	22.0095	24.9754	27.7317	31.1184	23.6353	26.6852	37.7143	32.2247	29.306	25.4151	39.1812	33.172	41.8655	39.7999	27.567	24.8169	21.9571	27.9557
877.25	28.7189	23.1879	21.9356	27.1821	25.6612	21.5246	22.05	24.9625	27.7378	31.1286	23.6523	26.6891	37.7315	32.2467	29.2785	25.4153	39.3017	33.2055	41.9008	39.8095	27.5688	24.8297	21.9554	27.9162
877.7	28.7061	23.2382	21.9163	27.1535	25.6492	21.5078	22.0386	24.9421	27.771	31.125	23.6668	26.7089	37.5967	32.2226	29.262	25.4475	39.4461	33.1844	41.9534	39.6536	27.5869	24.8212	21.9538	27.8688
878.15	28.693	23.2718	21.9292	27.1219	25.6753	21.4968	22.0377	24.8826	27.8209	31.1241	23.6742	26.6884	37.4054	32.1881	29.2391	25.4672	39.5924	33.2103	42.0519	39.5809	27.7628	24.8326	21.9445	27.8809
878.6	28.7288	23.2832	21.9413	27.0768	25.7139	21.4784	22.0423	24.8443	27.8682	31.1142	23.6734	26.6497	37.1883	32.1415	29.204	25.5555	39.6976	33.2562	42.0749	39.6488	27.9518	24.8574	21.9304	27.8557
879.05	28.7953	23.2606	21.9659	27.0421	25.7399	21.4964	22.053	24.8363	27.8974	31.0939	23.673	26.6213	37.1157	32.1087	29.1716	25.6397	39.7999	33.2782	42.1456	39.8984	28.1251	24.9119	21.9141	27.8373
879.5	28.8774	23.2383	21.9775	27.0209	25.7879	21.5166	22.0803	24.8524	27.9039	31.091	23.6933	26.5999	37.3203	32.1095	29.1609	25.6666	39.8678	33.3442	42.182	40.2694	28.2932	24.9864	21.8892	27.7861
879.95	28.9634	23.2375	21.9596	27.0021	25.8167	21.5363	22.0997	24.9002	27.9038	31.0992	23.6938	26.5898	37.5842	32.1109	29.1702	25.6843	39.9424	33.4245	42.2594	40.5152	28.1918	25.0364	21.8822	27.7498
880.4	29.0013	23.2583	21.9629	27.0136	25.8499	21.5639	22.1204	24.925	27.8922	31.0978	23.661	26.5794	37.8644	32.1301	29.1938	25.5913	40.0151	33.5019	42.4364	40.4339	28.0948	25.0697	21.8917	27.7608
880.85	29.0275	23.3111	21.9556	27.008	25.8778	21.5727	22.126	24.9402	27.8792	31.1223	23.6101	26.5695	38.0346	32.1289	29.2386	25.4938	40.0849	33.5823	42.5339	40.213	27.9662	25.0972	21.9154	27.778
881.3	29.0419	23.3426	21.9583	27.0119	25.9056	21.5721	22.128	24.9487	27.8372	31.1065	23.584	26.5268	38.0519	32.1743	29.246	25.4041	40.1796	33.6396	42.6496	39.995	27.8493	25.1001	21.9588	27.8424
881.75	29.0543	23.3598	21.9703	27.015	25.9157	21.5873	22.1286	24.9452	27.7884	31.0922	23.6155	26.5089	38.0528	32.2729	29.2392	25.3476	40.2379	33.6588	42.6917	39.8487	27.8739	25.0715	21.9826	27.859
882.2	29.112	23.3343	21.9768	27.0076	25.9675	21.5976	22.1411	24.8903	27.7678	31.1374	23.7044	26.5037	38.027	32.3224	29.2378	25.3483	40.3785	33.6521	42.7041	39.8353	27.9219	25.0435	21.9951	27.8859
882.65	29.1953	23.2939	21.9868	27.0156	26.0451	21.6078	22.1687	24.818	27.7695	31.1462	23.7909	26.5131	38.0079	32.3855	29.2059	25.3512	40.5181	33.6145	42.7557	39.8697	27.987	24.9708	21.9922	27.9102
883.1	29.2804	23.2905	21.9871	27.0411	26.09	21.6366	22.1688	24.7335	27.7942	31.1783	23.7908	26.5517	37.9983	32.3653	29.1953	25.3851	40.652	33.5884	42.794	39.8602	28.0327	24.8943	21.9713	27.8858
883.55	29.3787	23.2831	21.9865	27.0741	26.1332	21.6458	22.1663	24.6577	27.8326	31.1964	23.7437	26.5864	37.9696	32.2783	29.1784	25.3992	40.8336	33.5699	42.8227	39.8583	28.0608	24.8306	21.9676	27.9189
884	29.4175	23.294	21.9757	27.0952	26.0846	21.6719	22.1365	24.7002	27.8353	31.1721	23.6665	26.6111	37.9457	32.2381	29.1709	25.3948	40.9427	33.5763	42.8466	39.8965	28.0468	24.774	21.9444	27.8738
884.45	29.3985	23.3106	21.959	27.1112	26.017	21.7126	22.0812	24.7473	27.7972	31.1549	23.6025	26.6104	37.9304	32.2038	29.1782	25.3778	41.0651	33.6742	42.8581	39.8927	27.9436	24.738	21.9427	27.8503
884.9	29.3708	23.3199	21.9407	27.1101	25.9619	21.7617	22.0395	24.805	27.7564	31.157	23.59	26.5748	37.9371	32.1669	29.1728	25.3432	41.1884	33.7844	42.9154	39.864	27.8092	24.7106	21.9426	27.8617
885.35	29.3168	23.3508	21.9179	27.1058	25.9233	21.8228	22.017	24.8625	27.6963	31.1648	23.588	26.5314	37.9534	32.1448	29.1775	25.3239	41.2745	33.9128	43.0273	39.7674	27.6584	24.7691	21.9253	27.8461
885.8	29.2954	23.3977	21.8949	27.1199	25.939	21.9036	22.0078	24.8644	27.6625	31.1571	23.5913	26.4962	37.9448	32.1178	29.1604	25.3167	41.3787	34.0441	43.1258	39.6976	27.5184	24.8492	21.8531	27.921
886.25	29.3288	23.4248	21.8745	27.128	25.962	21.9738	22.021	24.8715	27.6439	31.1584	23.5875	26.4553	37.9065	32.071	29.1517	25.3316	41.4973	34.1245	43.2291	39.7196	27.603	24.9449	21.7848	27.9355
886.7	29.3689	23.4494	21.8628	27.1188	25.9912	21.9863	22.0405	24.8686	27.5593	31.1484	23.5823	26.3679	37.8453	32.0463	29.1544	25.3426	41.6082	34.1684	43.2826	39.798	27.744	25.0206	21.7285	27.9349
887.15	29.4185	23.4457	21.8662	27.1015	26.023	21.9822	22.0532	24.8681	27.493	31.1435	23.5948	26.2667	37.808	32.0286	29.1569	25.2868	41.7392	34.1933	43.2846	39.9596	27.9024	25.0464	21.6772	27.9061
887.6	29.4548	23.4762	21.8916	27.0646	26.0349	21.9029	22.0694	24.8719	27.4418	31.183	23.602	26.1556	37.8654	31.9896	29.1408	25.1808	41.8779	34.2163	43.341	40.0514	28.0814	25.0629	21.766	27.8234
888.05	29.4345	23.5262	21.9279	27.0363	26.0516	21.8222	22.0788	24.8702	27.441	31.2366	23.6067	26.107	37.984	31.9711	29.0938	25.0665	42.0012	34.2239	43.3792	40.0954	28.1398	25.0901	21.8465	27.8105
888.5	29.4096	23.5638	21.9551	27.0361	26.0819	21.7833	22.0893	24.8746	27.5796	31.2749	23.5959	26.1952	38.0777	31.9712	29.0322	24.9584	42.1294	34.2593	43.5734	40.1231	28.1967	25.1244	21.9425	27.7932
888.95	29.4231	23.6297	21.9761	27.0317	26.1075	21.7468	22.0866	24.8628	27.7176	31.3011	23.5708	26.2856	38.1762	31.9907	28.967	24.9358	42.2671	34.2985	43.8029	40.1968	28.2639	25.1467	22.0546	27.8292
889.4	29.4717	23.607	21.979	27.0324	26.1388	21.7548	22.0682	24.8388	27.8411	31.334	23.5378	26.3805	38.1953	31.9934	28.9457	25.0214	42.4335	34.3138	43.932	40.3354	28.3094	25.1646	22.0996	27.8686
889.85	29.5827	23.5655	21.9687	27.0198	26.194	21.7674	22.0697	24.8282	27.9233	31.3559	23.493	26.429	38.202	31.9751	28.9571	25.0823	42.5798	34.3549	44.084	40.4425	28.3324	25.1465	22.1294	27.887
890.3	29.6803	23.527	21.995	26.988	26.2243	21.7771	22.0684	24.7948	27.9294	31.4851	23.4146	26.41	38.2288	31.9175	28.984	25.1439	42.7701	34.3712	43.9606	40.5401	28.3295	25.124	22.132	27.945
890.75	29.7117	23.4801	22.0101	26.924	26.2554	21.8	22.085	24.7848	27.9258	31.6584	23.3264	26.4081	38.2173	31.8184	29.0118	25.1767	42.9566	34.4008	43.822	40.5018	28.3002	25.0809	22.1213	27.9442
891.2	29.7017	23.4675	22.0101	26.8648	26.3199	21.8211	22.1303	24.7779	27.8999	31.7483	23.2408	26.383	38.2068	31.7848	29.0248	25.1384	43.056	34.4572	43.7512	40.3995	28.3323	25.0172	22.0848	27.9485
891.65	29.6474	23.4585	22.0174	26.8133	26.3349	21.839	22.151	24.8107	27.8656	31.8239	23.1919	26.3681	38.1791	31.8015	29.0432	25.1206	43.1708	34.5185	43.6871	40.3278	28.3949	24.9853	22.0681	27.9164
892.1	29.5923	23.4554	21.988	26.7748	26.3614	21.8634	22.1725	24.8773	27.8288	31.7086	23.2477	26.3648	38.1628	31.8944	29.0613	25.0917	43.2109	34.6351	43.7656	40.279	28.4901	24.9004	22.0533	27.8245
892.55	29.5654	23.4367	21.9617	26.8357	26.3744	21.8749	22.1803	24.9134	27.7916	31.5501	23.312	26.3511	38.1685	32.0184	29.0886	25.0406	43.2406	34.6992	43.8593	40.2704	28.6074	24.8225	22.0328	27.7909
893	29.5501	23.426	21.958	26.9021	26.3496	21.8534	22.1673	24.9494	27.7773	31.436	23.3957	26.3763	38.2011	32.1036	29.1041	25.0156	43.3219	34.7174	43.9578	40.2924	28.614	24.7583	22.0633	27.7463
893.45	29.541	23.4353	21.9455	26.9853	26.3384	21.7674	22.1592	24.8887	27.7666	31.3415	23.4584	26.3874	38.267	32.1427	29.0954	24.985	43.3936	34.7107	44.0324	40.3192	28.5883	24.6776	22.0421	27.7512
893.9	29.5595	23.4643	21.9242	27.0587	26.3366	21.6776	22.1412	24.8068	27.7673	31.3431	23.4561	26.3776	38.3292	32.1198	29.0751	24.9808	43.4863	34.7126	44.0945	40.323	28.5417	24.7512	22.0198	27.7894
894.35	29.5825	23.5045	21.9134	27.0734	26.3454	21.5976	22.1135	24.7384	27.7635	31.3527	23.4582	26.3717	38.3378	32.0999	29.043	24.9943	43.5533	34.7919	44.1385	40.4502	28.4968	24.8411	22.0244	27.7995
894.8	29.6159	23.5507	21.8939	27.0791	26.3477	21.566	22.0874	24.6822	27.7297	31.3509	23.4354	26.3539	38.3378	32.0691	29.0419	24.9972	43.6202	34.9459	44.1462	40.5707	28.5187	24.9232	21.9896	27.8329
895.25	29.6781	23.5668	21.8797	27.0721	26.3645	21.6642	22.0482	24.688	27.6329	31.3276	23.4239	26.335	38.2727	32.0424	29.0442	25.0131	43.6776	35.0893	44.1777	40.694	28.5743	25.0207	22.0275	27.8254
895.7	29.7225	23.5319	21.8885	27.0678	26.354	21.7557	22.0165	24.7118	27.5415	31.3206	23.4267	26.3213	38.1991	32.0293	29.0549	24.9988	43.7417	35.1094	44.2389	40.8509	28.6031	25.0243	22.081	27.8183
896.15	29.7597	23.5382	21.9014	27.0503	26.334	21.8586	21.9988	24.7442	27.4606	31.3152	23.4282	26.306	38.2049	31.9937	29.0608	25.0103	43.8708	35.0807	44.3575	40.8528	28.6367	25.0371	22.0923	27.7829
896.6	29.7982	23.5412	21.931	27.0237	26.3432	21.9377	21.98	24.7731	27.4408	31.3479	23.4489	26.2983	38.2096	31.9771	29.0701	25.0129	44.0104	34.9956	44.4942	40.8843	28.6507	25.0658	22.1578	27.7498
897.05	29.8103	23.5808	21.9571	26.9938	26.3405	21.9503	21.9858	24.7815	27.5555	31.4113	23.4265	26.3096	38.2441	31.9907	29.0895	25.0008	44.1749	34.9669	44.6224	40.87	28.6545	25.0761	22.1801	27.7526
897.5	29.8248	23.6544	21.9836	26.9701	26.377	21.963	21.9908	24.7788	27.655	31.4292	23.3942	26.3998	38.2976	32.0173	29.0945	24.9834	44.3317	35.0272	44.7285	40.7887	28.6882	25.1043	22.1836	27.7206
897.95	29.8428	23.6479	21.9961	26.9656	26.4135	21.9489	21.9941	24.7458	27.7658	31.4558	23.3508	26.5183	38.3158	32.0452	29.1155	24.9256	44.4483	35.1037	44.7496	40.761	28.7064	25.1142	22.212	27.7586
898.4	29.8497	23.6402	21.9767	26.9896	26.3735	21.952	22.0082	24.6905	27.8291	31.449	23.2831	26.6138	38.354	32.0585	29.0807	24.869	44.5564	35.1965	44.7601	40.7275	28.7714	25.0898	22.1526	27.7641
898.85	29.8705	23.5979	21.9508	27.019	26.3354	21.9529	22.0202	24.6484	27.8343	31.3857	23.2955	26.6764	38.4009	32.0509	29.0209	24.8372	44.608	35.2347	44.763	40.7065	28.8353	25.0399	22.0909	27.7524
899.3	29.9119	23.556	21.9183	27.0444	26.2731	21.9454	22.0408	24.6216	27.8441	31.3112	23.3211	26.5919	38.4372	32.0283	28.9759	24.8476	44.566	35.2749	44.7534	40.7275	28.8908	24.9653	22.0402	27.7705
899.75	29.9611	23.5539	21.88	27.0615	26.2457	21.9729	22.0686	24.6177	27.8395	31.2055	23.3591	26.4661	38.486	31.9924	28.9389	24.8644	44.5019	35.3361	44.7668	40.7667	28.9233	24.9037	21.9833	27.7083
900.2	30.0276	23.5406	21.871	27.0325	26.3528	21.9784	22.0856	24.6904	27.8294	31.104	23.4356	26.3387	38.5319	31.9465	28.9492	24.8985	44.433	35.3992	44.8038	40.7581	28.9003	24.8594	21.9864	27.726
900.65	30.1068	23.553	21.8921	26.9976	26.4687	22.0092	22.0876	24.7595	27.8293	31.0855	23.4288	26.2537	38.574	31.8873	29.001	24.8921	44.4981	35.4891	44.8375	40.7772	28.8714	24.9067	22.0066	27.7441
901.1	30.1574	23.5633	21.9158	26.9729	26.5973	22.0491	22.0759	24.809	27.8236	31.1777	23.398	26.2353	38.6189	31.8438	29.0429	24.8776	44.7849	35.5684	44.8825	40.8002	28.8454	24.9807	22.0316	27.782
901.55	30.2043	23.5737	21.9542	26.9482	26.7084	22.0469	22.0572	24.8687	27.8086	31.2889	23.3836	26.234	38.6448	31.887	29.0506	24.8795	45.1158	35.6067	45.3654	40.7801	28.8719	25.0622	22.0917	27.8753
																					30.4997	25.5827	22.356	27.7716
																					30.5595	25.5737	22.3631	27.7865
																					30.5953	25.5303	22.345	27.8636
																					30.643	25.4803	22.3403	27.9305
																					30.7159	25.395	22.3188	27.9766
																					30.7523	25.3066	22.2648	28.0241
																					30.8087	25.239	22.2303	28.0175
																					30.828	25.2044	22.1799	27.9823
																					30.8574	25.3234	22.1474	27.9178
																					30.9925	25.4189	22.1122	27.8724
																					31.1103	25.5089	22.0685	27.8706
																					31.2133	25.5639	22.0569	27.9046
																					31.3163	25.5508	22.0429	27.987
																					31.2821	25.5692	22.1341	28.0105
																					31.2903	25.5986	22.2044	28.002
																					31.2886	25.6315	22.2397	27.9492
																					31.2395	25.6469	22.2764	27.8573
																					31.2864	25.6353	22.2332	27.8201
																					31.2655	25.607	22.2281	27.7862
																					31.3048	25.5804	22.2322	27.8086
																					31.3841	25.5634	22.2279	27.8391
																					31.4162	25.5719	22.2759	27.8582
																					31.5035	25.6155	22.3093	27.9171
																					31.5466	25.6978	22.3497	27.9235
																					31.5365	25.7694	22.3692	27.9435
																					31.521	25.8374	22.3451	27.9272
																					31.4699	25.8631	22.332	27.8597
																					31.4446	25.8437	22.322	27.8705
																					31.5139	25.7889	22.3796	27.8632
																					31.6036	25.7031	22.4501	27.9092
																					31.6971	25.6623	22.5107	27.9706
																					31.7587	25.652	22.5389	27.9658
																					31.7758	25.6416	22.4966	27.9892
																					31.789	25.6717	22.4948	27.9883
																					31.8189	25.668	22.5029	28.0146
																					31.8648	25.6447	22.5412	28.0417
																					31.8925	25.7132	22.6279	28.0359
																					31.9428	25.7517	22.6261	28.0164
																					32.0253	25.786	22.6013	27.9712
																					32.1208	25.823	22.5824	27.9597
																					32.2465	25.8049	22.5335	27.956
																					32.338	25.8078	22.5228	27.9773
																					32.3294	25.8456	22.5363	28.0082
																					32.3074	25.8916	22.5433	28.0006
																					32.2713	25.9517	22.5564	28.0238
																					32.2743	25.9854	22.5847	28.0211
																					32.3675	25.9901	22.6076	28.0027
																					32.4721	25.9801	22.6173	28.0056
																					32.592	25.9461	22.6243	27.9479
																					32.6786	25.9517	22.6037	27.9109
																					32.7421	25.9578	22.5705	27.909
																					32.791	26.0057	22.5399	27.9084
																					32.813	26.0671	22.4951	27.9619
																					32.7917	26.0927	22.4823	28.0217
																					32.7688	26.1231	22.4866	28.0457
																					32.739	26.0892	22.5183	28.0529
																					32.7227	26.1604	22.5078	28.0535
																					32.8319	26.2526	22.4752	28.0312
																					32.925	26.355	22.4176	28.0242
																					33.0517	26.496	22.3411	28.0561
																					33.1685	26.4289	22.3928	28.0571
																					33.1745	26.3451	22.4516	28.08
																					33.2087	26.2449	22.5568	28.1032
																					33.2261	26.1419	22.646	28.0812
																					33.2439	26.1524	22.6839	28.1611
																					33.2903	26.1697	22.7265	28.2193
																					33.2883	26.2191	22.7261	28.2573
																					33.3068	26.2642	22.7504	28.3247
																					33.3399	26.2839	22.7675	28.2274
																					33.4034	26.3106	22.7896	28.1331
																					33.4854	26.3006	22.8083	28.0375
																					33.5044	26.2864	22.796	27.9272
																					33.5081	26.2703	22.7623	27.9004
																					33.4914	26.2637	22.7167	27.8833
																					33.4873	26.2401	22.6986	27.8966
																					33.517	26.1999	22.7224	27.921
																					33.5535	26.1689	22.7731	27.9605
																					33.6042	26.1194	22.8304	27.9978
																					33.6772	26.1287	22.8709	28.0178
																					33.7423	26.1804	22.8644	28.0234
																					33.8189	26.2479	22.8384	27.996
																					33.8822	26.3206	22.8067	27.9919
																					33.8702	26.3635	22.7862	28.0119
																					33.8866	26.3662	22.8231	28.0509
																					33.9039	26.4341	22.8662	28.1264
																					33.9307	26.5134	22.9167	28.1545
																					34.0559	26.6064	22.9541	28.1539
																					34.1763	26.7214	22.9448	28.1104
																					34.2613	26.6912	22.9411	28.0149
																					34.309	26.6351	22.9286	27.9496
																					34.3387	26.5518	22.9287	27.8922
																					34.3597	26.4753	22.9438	27.8784
																					34.4123	26.4666	22.9642	27.9294
																					34.4792	26.4768	22.9779	27.976
																					34.507	26.5061	22.9973	28.0203
																					34.5194	26.543	23.0034	28.0706
																					34.55	26.5775	22.9764	28.0661
																					34.6083	26.6061	22.9661	28.0497
																					34.6753	26.6251	22.9358	28.0288
																					34.7738	26.6218	22.9589	27.9667
																					34.8197	26.6148	23.014	27.9499
																					34.8828	26.595	23.0627	27.9727
																					34.9689	26.5645	23.1314	28.02
																					35.0645	26.5053	23.1303	28.1174
																					35.2098	26.4696	23.1161	28.1787
																					35.3198	26.4613	23.1192	28.1931
																					35.426	26.4998	23.0991	28.206
																					35.4977	26.6197	23.0953	28.1801
																					35.5283	26.7247	23.0833	28.1653
																					35.5416	26.8105	23.0434	28.1557
																					35.5177	26.8458	23.0106	28.1006
																					35.4766	26.7909	22.9824	28.0696
																					35.4833	26.7196	22.976	28.0634
																					35.491	26.6687	22.998	28.1112
																					35.5235	26.6326	23.0324	28.1846
																					35.6258	26.6281	23.0793	28.2428
																					35.6956	26.6656	23.1136	28.2509
																					35.7731	26.705	23.1203	28.1674
																					35.8735	26.7743	23.0998	28.1011
																					35.906	26.8767	23.0802	28.0331
																					35.9347	26.938	23.0561	28.0082
																					35.9548	26.9555	23.0401	28.0254
																					35.9117	26.9602	23.0657	28.0305
																					35.9012	26.942	23.1031	28.0668
																					35.9031	26.9454	23.1477	28.0528
																					36.0322	26.9783	23.1848	28.0946
																					36.2187	26.9816	23.2027	28.1141
																					36.3889	26.9905	23.1926	28.0811
																					36.5754	26.9933	23.1907	28.1121
																					36.6136	26.9826	23.1998	28.0613
																					36.627	26.9592	23.2112	28.059
																					36.6203	26.9209	23.2355	28.1103
																					36.562	26.8777	23.2548	28.137
																					36.5352	26.8638	23.2641	28.216
																					36.5486	26.9093	23.2603	28.2625
																					36.6222	26.9865	23.2666	28.2675
																					36.7227	27.0817	23.2607	28.2676
																					36.8173	27.1524	23.2624	28.2421
																					36.8613	27.1893	23.2703	28.2243
																					36.8604	27.1948	23.254	28.1989
																					36.8804	27.2188	23.2379	28.1817
																					36.9378	27.2595	23.259	28.1747
																					37.0038	27.3195	23.2991	28.1699
																					37.0838	27.3843	23.3576	28.1943
																					37.1415	27.3884	23.4469	28.1984
																					37.1644	27.384	23.4744	28.2186
																					37.2103	27.3605	23.4725	28.2392
																						27.3512	23.461	28.2734
																						27.3663	23.4301	28.3325
																						27.388	23.4401	28.3476
																						27.3974	23.4643	28.3303
																						27.3641	23.4845	28.2761
																						27.3205	23.4872	28.2106
																						27.2705	23.4696	28.1985
																						27.268	23.4517	28.2066
																						27.3098	23.4287	28.2219
																						27.3773	23.4197	28.2329
																						27.4258	23.4254	28.2179
																						27.4188	23.4373	28.2723
																						27.3884	23.4815	28.4025
																						27.3384	23.5549	28.7416
