# Supplementary material for: A novel MOF-based electrochemical sensor for simultaneous quantification of nitrophenols in binary mixtures using artificial neural networks: challenges and opportunities
Source: RSC Adv. 2025 Oct 29;15(49):41400–17. doi: 10.1039/d5ra03838c (PMC12570034; doi:10.1039/d5ra03838c)
Supplement: RA-015-D5RA03838C-s002 [file RA-015-D5RA03838C-s002.xlsx]

## Sheet: 2np(10ppm)
	run1	run2	run4	run5	run6	run7	run8	run9	run10	run11
scan-time	70-11	112-145	70-280	70-145	100-50	40-240	70-145	40-50	27.5-145	100-240
Potential [mV]	di [µA/]	di [µA/]	di [µA/]	di [µA/]	di [µA/]	di [µA/]	di [µA/]	di [µA/]	di [µA/]	di [µA/]
200	85.4244	157.882	121.679	58.5236	113.792	67.2372	91.2854	53.4235	45.6349	156.209
200.45	68.1059	132.594	100.965	54.4303	95.4715	56.8526	76.3791	45.8132	38.9661	129.082
200.9	54.3027	112.255	84.1536	50.9299	80.7866	48.444	64.2166	39.6045	33.4742	107.634
201.35	45.4419	97.2525	71.4983	48.0305	69.5418	42.1577	55.0342	34.9034	29.328	92.0552
201.8	40.4225	86.8617	62.4157	45.6303	61.3762	37.7118	48.3623	31.5592	26.3666	81.6424
202.25	37.8788	79.7834	56.1913	43.8583	55.585	34.8024	43.6699	29.2199	24.3394	75.2048
202.7	36.7877	74.1797	51.9034	42.3484	50.9003	32.6549	40.3995	27.4921	22.7989	70.2523
203.15	35.8104	69.2224	48.8539	41.0679	47.5189	30.9707	38.0079	26.1045	21.5932	66.0696
203.6	34.9335	64.6992	46.7482	40.0419	45.067	29.646	36.3469	24.9417	20.6225	62.2608
204.05	34.2067	61.3351	45.3673	39.0359	43.4251	28.6259	35.3489	24.055	19.857	58.7723
204.5	33.5411	58.953	44.0744	38.1762	42.3732	27.8121	34.5495	23.2838	19.3026	56.1512
204.95	32.9625	57.466	42.9068	37.4112	41.459	27.1031	33.8807	22.6056	18.7776	54.1659
205.4	32.4177	56.6035	41.875	36.6375	40.5822	26.4417	33.2821	22.0123	18.2834	52.7449
205.85	31.9214	55.7935	40.935	35.9347	39.8344	25.7886	32.6753	21.5068	17.8148	51.8393
206.3	31.531	55.0323	40.3316	35.1951	39.076	25.1967	32.1275	21.0547	17.3722	50.9777
206.75	31.216	54.1573	39.8535	34.583	38.4411	24.5794	31.6621	20.7231	17.0169	50.0291
207.2	30.8715	53.3856	39.3151	34.116	38.006	24.016	31.2417	20.4272	16.6957	49.1206
207.65	30.5392	52.788	38.8389	33.7875	37.5221	23.5021	30.8703	20.0987	16.349	48.1864
208.1	30.2123	52.2046	38.2651	33.7562	37.1453	22.9978	30.5241	19.7889	15.9857	47.3965
208.55	29.863	51.7781	37.6818	33.618	36.6356	22.7184	30.153	19.4259	15.6402	47.0905
209	29.4871	51.3268	37.195	33.4079	36.038	22.4509	29.856	19.0985	15.3385	46.8361
209.45	29.1769	50.6861	36.7112	33.1146	35.491	22.2038	29.582	18.776	15.1705	46.6812
209.9	28.8112	50.1133	36.2512	32.4558	34.9526	21.9616	29.2431	18.4958	15.0409	46.5387
210.35	28.4338	49.5701	35.863	31.8618	34.5586	21.6361	28.947	18.2727	14.8825	46.1486
210.8	28.0987	48.9858	35.5426	31.3219	34.2077	21.3495	28.6647	18.0706	14.7203	45.8598
211.25	27.7674	48.6033	35.2509	30.8269	33.7907	21.0676	28.3963	17.9335	14.5281	45.5959
211.7	27.5614	48.1673	34.9994	30.507	33.435	20.8291	28.1962	17.7909	14.3822	45.3052
212.15	27.4033	47.6987	34.6619	30.1641	33.1013	20.5934	28.0113	17.6523	14.208	45.0049
212.6	27.3134	47.3822	34.2727	29.7763	32.8115	20.3682	27.6496	17.5086	14.064	44.588
213.05	27.2062	46.9758	33.8915	29.342	32.7503	20.1384	27.2514	17.3592	13.8599	44.1261
213.5	26.9368	46.6573	33.5935	28.9466	32.7006	19.8981	26.9232	17.2194	13.6192	43.6642
213.95	26.6239	46.2853	33.3796	28.6834	32.6107	19.6737	26.5417	17.0669	13.5462	43.2999
214.4	26.3696	45.9133	33.2076	28.5219	32.538	19.4659	26.2752	16.9336	13.4718	42.9326
214.85	26.1007	45.6293	32.9744	28.4425	32.3668	19.31	25.9605	16.8065	13.4811	42.6219
215.3	25.9539	45.309	32.5461	28.3711	32.1957	19.2055	25.5492	16.6673	13.4891	42.3531
215.75	25.8659	45.1311	32.0811	28.1677	32.145	19.1316	25.2232	16.533	13.4024	42.049
216.2	25.676	44.8882	31.6054	27.9312	32.0322	19.0624	24.91	16.3997	13.3015	41.8712
216.65	25.4386	44.5793	31.2185	27.689	31.9155	18.9874	24.7342	16.2654	13.1802	41.6417
217.1	25.1695	44.3479	30.9009	27.5051	31.7328	18.8657	24.5995	16.1855	13.1386	41.3806
217.55	24.8995	44.0993	30.6888	27.4024	31.4995	18.7044	24.4404	16.128	13.1132	41.1922
218	24.7391	43.9042	30.5261	27.2895	31.3408	18.5475	24.3087	16.037	13.103	40.9599
218.45	24.7086	43.8048	30.3922	27.3025	31.1274	18.4027	24.1092	15.9326	13.082	40.803
218.9	24.7659	43.6097	30.4051	27.2585	31.002	18.3084	23.9654	15.7717	12.95	40.65
219.35	24.8505	43.4414	30.3373	27.2048	30.7093	18.2436	23.84	15.6523	12.8303	40.4808
219.8	24.8915	43.2473	30.2441	27.174	30.3193	18.1566	23.7099	15.5588	12.6896	40.4196
220.25	24.8539	43.0034	30.1091	26.8759	30.0202	18.0269	23.6282	15.5191	12.5531	40.3096
220.7	24.6697	42.9642	29.9134	26.6068	29.6274	17.8573	23.5272	15.482	12.4543	40.2455
221.15	24.4293	42.859	29.8034	26.3516	29.4224	17.6811	23.3852	15.3173	12.316	40.016
221.6	24.2362	42.6917	29.7004	26.0352	29.2843	17.5198	23.2922	15.1654	12.1946	39.5924
222.05	24.1084	42.5655	29.6241	25.8749	29.1261	17.4164	23.1787	14.9725	12.0518	39.2281
222.5	24.1595	42.2011	29.5114	25.6875	29.1051	17.3559	23.038	14.8273	11.9477	38.7117
222.95	24.2572	41.8951	29.3366	25.4985	29.0312	17.2654	22.9765	14.8181	11.8464	38.3636
223.4	24.2537	41.7	29.1993	25.4391	28.9512	17.1765	22.8829	14.8086	11.777	38.1685
223.85	24.1935	41.4285	29.0642	25.4045	28.8716	17.0461	22.8146	14.8001	11.7604	37.9314
224.3	24.0302	41.2439	28.8579	25.385	28.6734	16.8971	22.7804	14.8157	11.7116	37.9333
224.75	23.8539	40.9981	28.6856	25.3617	28.4674	16.8395	22.7138	14.7739	11.706	37.9056
225.2	23.6473	40.6768	28.4802	25.3166	28.4118	16.7829	22.5714	14.7472	11.6783	37.8061
225.65	23.4221	40.4177	28.2819	25.2238	28.3972	16.7613	22.4228	14.7916	11.6344	37.742
226.1	23.1407	40.192	28.3404	25.1817	28.4656	16.7378	22.2603	14.7986	11.609	37.5575
226.55	22.8236	40.0543	28.4245	25.1824	28.6132	16.6781	22.1002	14.8082	11.5445	37.4226
227	22.6427	40.016	28.5202	25.1576	28.589	16.6439	22.0769	14.7939	11.4683	37.349
227.45	22.522	39.9778	28.6256	25.2249	28.4043	16.4804	22.0456	14.6775	11.4189	37.2591
227.9	22.519	39.8879	28.5718	25.2084	28.1808	16.3261	22.0595	14.5343	11.3572	37.2247
228.35	22.5887	39.7148	28.4563	25.1408	27.8747	16.151	22.1102	14.4079	11.3414	37.1338
228.8	22.6259	39.4843	28.3705	25.0928	27.6116	15.9811	22.1026	14.3027	11.3236	37.0047
229.25	22.6487	39.2625	28.3744	24.9613	27.6565	16.0744	22.1053	14.2466	11.2514	36.8795
229.7	22.6244	39.165	28.3625	24.8779	27.7663	16.1637	22.0478	14.1961	11.1954	36.7724
230.15	22.5686	39.1085	28.354	24.7597	27.9397	16.2527	21.9279	14.137	11.1413	36.6959
230.6	22.4562	39.0789	28.3139	24.5261	28.1233	16.3166	21.8067	14.0261	11.116	36.6375
231.05	22.3324	39.0196	27.9954	24.2969	28.0888	16.2276	21.6673	13.9025	11.1341	36.627
231.5	22.2173	38.9039	27.7173	24.0895	28.0124	16.1215	21.5471	13.8243	11.1221	36.5563
231.95	22.1265	38.7557	27.4808	23.924	27.9336	16.0775	21.4657	13.751	11.0849	36.4778
232.4	22.1369	38.5807	27.3256	23.9323	27.8448	16.0461	21.3948	13.7702	11.0347	36.3889
232.85	22.2029	38.4583	27.4051	23.9616	27.7656	16.0105	21.2996	13.7818	11.0076	36.213
233.3	22.2639	38.2603	27.4533	23.9291	27.7125	15.9741	21.2269	13.7768	11.0479	36.0743
233.75	22.3214	38.1236	27.4877	23.9638	27.6673	15.8706	21.1551	13.7524	11.0655	35.9213
234.2	22.3353	38.026	27.3539	23.892	27.649	15.7173	21.0885	13.6915	11.0866	35.7702
234.65	22.2722	37.8855	27.2459	23.8268	27.6988	15.5705	21.1153	13.6923	11.0252	35.6937
235.1	22.2516	37.8185	27.1711	23.7885	27.6251	15.495	21.1318	13.7182	10.924	35.622
235.55	22.2007	37.7372	27.1137	23.7261	27.504	15.4535	21.1086	13.7751	10.9013	35.6315
236	22.1829	37.6282	27.1373	23.5499	27.3254	15.5217	21.0908	13.8017	10.9265	35.6478
236.45	22.2256	37.5728	27.0285	23.3098	27.0805	15.6313	21.0149	13.7694	11.0008	35.6411
236.9	22.2637	37.5278	26.9836	23.0774	27.0178	15.6596	20.9891	13.6756	11.0465	35.6067
237.35	22.3119	37.4819	26.8952	22.8046	27.0046	15.6544	20.9943	13.5833	10.9985	35.4632
237.8	22.2315	37.4915	26.8181	22.8108	27.0656	15.5509	20.9613	13.5106	10.8585	35.338
238.25	22.1278	37.4561	26.7972	22.9732	27.155	15.4047	20.9498	13.5116	10.7037	35.1812
238.7	21.9352	37.3834	26.6643	23.1641	27.1333	15.3614	20.8364	13.5274	10.5886	35.0148
239.15	21.7088	37.3041	26.5526	23.2947	27.1183	15.3531	20.7558	13.5513	10.5395	34.8876
239.6	21.5575	37.173	26.4425	23.2403	27.0527	15.3979	20.6951	13.5946	10.5144	34.7862
240.05	21.4629	37.0803	26.3634	23.0573	27.0312	15.4705	20.6465	13.5067	10.5022	34.7642
240.5	21.4681	37.0028	26.2982	22.8604	27.0781	15.4138	20.6421	13.454	10.4822	34.7135
240.95	21.5854	37.0009	26.2783	22.7202	26.9601	15.3232	20.5946	13.3449	10.5053	34.6265
241.4	21.7476	37.0382	26.2407	22.6699	26.8336	15.2125	20.5628	13.2013	10.5783	34.5098
241.85	21.8261	37.0019	26.1346	22.6645	26.6426	15.0922	20.4685	13.1602	10.6568	34.3903
242.3	21.8329	36.9311	26.0426	22.6771	26.3878	15.0391	20.426	13.0902	10.7249	34.4056
242.75	21.7428	36.7217	25.8891	22.8016	26.3659	15.0158	20.3994	13.098	10.6366	34.463
243.2	21.6624	36.4339	25.8119	22.9033	26.3883	15.0067	20.3513	13.1538	10.5351	34.4362
243.65	21.6172	36.2216	25.7848	22.9346	26.3639	15.071	20.3772	13.213	10.4375	34.3616
244.1	21.6055	36.0743	25.7863	22.8881	26.2793	15.1466	20.3081	13.2874	10.374	34.1637
244.55	21.62	35.9624	25.6421	22.7518	25.9435	15.2459	20.2141	13.3006	10.4096	34.0221
245	21.4925	35.9155	25.3999	22.5968	25.5784	15.3427	20.1442	13.2813	10.3873	34.0614
245.45	21.326	35.8687	25.1205	22.5493	25.2833	15.2677	20.0448	13.2109	10.385	34.0814
245.9	21.1183	35.8084	24.7614	22.6048	25.0645	15.1732	19.9961	13.1451	10.3361	34.179
246.35	20.8769	35.8582	24.7736	22.6691	25.0014	15.0312	20.02	13.0972	10.3123	34.222
246.8	20.75	35.9012	24.9085	22.7529	24.9601	14.8508	20.0329	13.0468	10.3756	34.0814
247.25	20.6659	35.8897	25.0705	22.8508	24.8292	14.7696	20.0195	13.024	10.3786	33.9762
247.7	20.6565	35.8362	25.3656	22.8717	24.6661	14.6749	20.0398	13.023	10.3977	33.9112
248.15	20.6927	35.7071	25.4723	22.7937	24.4814	14.4798	19.9936	13.038	10.3625	33.8538
248.6	20.712	35.5809	25.4693	22.7054	24.291	14.3634	19.9911	13.0688	10.2704	33.8701
249.05	20.6929	35.4537	25.4363	22.5004	24.2908	14.249	20.0005	13.0904	10.2178	33.828
249.5	20.6099	35.3686	25.3248	22.3861	24.3922	14.1677	19.9801	13.0569	10.19	33.6683
249.95	20.5041	35.2624	25.1794	22.4136	24.5428	14.3283	19.9756	13.0263	10.1789	33.5163
250.4	20.4217	35.1869	25.0699	22.428	24.7207	14.4473	19.8864	12.9886	10.1249	33.3594
250.85	20.3928	35.1333	25.1071	22.5195	24.7967	14.5853	19.7855	12.966	10.0551	33.3078
251.3	20.4101	35.0836	25.1627	22.5281	24.7993	14.7303	19.6626	13.0009	9.95437	33.3097
251.75	20.4461	35.1056	25.2016	22.5129	24.7512	14.723	19.557	13.0138	9.89164	33.3135
252.2	20.4485	34.9956	25.1581	22.4387	24.6603	14.696	19.4732	13.0234	9.95677	33.3422
252.65	20.4402	34.9344	24.8619	22.2924	24.5843	14.6196	19.4847	12.9971	10.0378	33.2887
253.1	20.4248	34.878	24.5299	22.0845	24.5477	14.493	19.5977	12.9452	10.1399	33.215
253.55	20.4169	34.7499	24.2385	21.8081	24.5818	14.4069	19.6966	12.8888	10.191	33.2055
254	20.4542	34.7766	24.035	21.6035	24.6826	14.3401	19.822	12.8233	10.1704	33.1978
254.45	20.4826	34.7958	23.9875	21.3659	24.7039	14.3294	19.8528	12.8032	10.1387	33.2122
254.9	20.5155	34.7671	23.9008	21.2468	24.7122	14.369	19.7525	12.772	10.1436	33.2294
255.35	20.5479	34.7728	23.7894	21.1632	24.6734	14.4164	19.6487	12.7553	10.1653	33.0697
255.8	20.5003	34.7824	23.7262	21.1067	24.5846	14.4749	19.5437	12.7223	10.1644	32.9454
256.25	20.4229	34.7327	23.5885	21.2474	24.6591	14.493	19.3397	12.7042	10.1694	32.8325
256.7	20.3114	34.8082	23.6063	21.3732	24.7063	14.4993	19.2011	12.6861	10.0852	32.6834
257.15	20.1652	34.8235	23.7182	21.5783	24.7312	14.4948	19.0829	12.6262	10.0486	32.6451
257.6	20.0884	34.7585	23.7561	21.6434	24.7714	14.531	18.9739	12.618	10.0555	32.5418
258.05	20.0848	34.7212	23.9147	21.6187	24.7963	14.5598	19.1249	12.5694	10.0281	32.494
258.5	20.1485	34.5108	24.0573	21.6041	24.8697	14.5831	19.2499	12.5295	10.0347	32.5294
258.95	20.2357	34.4114	24.1001	21.4695	25.0146	14.5721	19.3473	12.6047	9.97733	32.5657
259.4	20.2957	34.3052	24.1424	21.5858	25.1876	14.4411	19.4236	12.6775	9.89786	32.5897
259.85	20.2997	34.2488	24.066	21.6815	25.1942	14.3566	19.359	12.7368	9.85072	32.4959
260.3	20.2315	34.2526	23.9063	21.7356	25.1908	14.2563	19.3385	12.8262	9.81619	32.2913
260.75	20.1442	34.1637	23.842	21.9041	25.0383	14.189	19.3257	12.8137	9.78339	32.1077
261.2	20.0714	34.0499	23.8467	21.9098	24.8206	14.1907	19.3396	12.7766	9.75404	31.9776
261.65	19.9974	33.8318	23.9362	21.9	24.7703	14.1866	19.3389	12.7758	9.76647	31.8887
262.1	19.9457	33.6463	24.0006	21.8971	24.7149	14.1892	19.2615	12.7375	9.76025	31.8514
262.55	19.9628	33.5249	23.9475	21.7528	24.7841	14.2397	19.1756	12.7148	9.78884	31.7481
263	19.9586	33.5249	23.8213	21.637	24.8205	14.2797	19.0556	12.6839	9.82796	31.6133
263.45	19.9777	33.6434	23.5454	21.525	24.7425	14.2471	18.9803	12.6343	9.80739	31.5502
263.9	20.0207	33.7687	23.3247	21.4306	24.6435	14.2346	18.9498	12.5798	9.80912	31.6123
264.35	19.9899	33.9083	23.1702	21.3991	24.5938	14.1296	18.9498	12.5686	9.82757	31.7128
264.8	20.0056	33.9533	23.07	21.3689	24.5979	14.0618	19.0991	12.6654	9.77632	31.838
265.25	19.9954	33.9246	23.2082	21.509	24.6618	14.0816	19.2179	12.7679	9.77326	31.9174
265.7	19.9656	33.8242	23.3264	21.6216	24.6998	14.0942	19.3289	12.8769	9.77297	31.8868
266.15	19.9305	33.6588	23.4396	21.8239	24.637	14.156	19.4166	12.9261	9.69341	31.8639
266.6	19.8661	33.5268	23.5526	22.0215	24.6906	14.1978	19.2499	12.7867	9.70565	31.8189
267.05	19.8317	33.414	23.6261	21.8667	24.7408	14.1157	19.0842	12.6489	9.68174	31.7233
267.5	19.7636	33.3987	23.7427	21.7656	24.8713	14.0012	18.9418	12.5295	9.65688	31.6382
267.95	19.7698	33.3623	23.8341	21.5084	24.9766	13.8926	18.8053	12.4666	9.69389	31.5225
268.4	19.7692	33.3355	23.8562	21.1848	24.9232	13.7727	18.7734	12.5091	9.71559	31.4469
268.85	19.7655	33.2925	23.7642	21.0507	24.8289	13.8285	18.6301	12.5334	9.73721	31.3934
269.3	19.8077	33.194	23.6008	20.8615	24.5792	13.906	18.4962	12.544	9.74247	31.3455
269.75	19.7902	33.1624	23.5274	20.743	24.5257	13.9642	18.3713	12.5197	9.733	31.3379
270.2	19.7526	33.0936	23.4778	20.6611	24.5453	14.0107	18.2699	12.4611	9.6979	31.2844
270.65	19.6793	32.9741	23.4795	20.5702	24.5769	13.9632	18.4333	12.4304	9.71693	31.1667
271.1	19.6283	32.8813	23.5418	20.3587	24.786	13.9282	18.5381	12.3997	9.74247	31.0596
271.55	19.6008	32.7694	23.5222	20.1676	24.7126	13.8835	18.6365	12.3607	9.76848	30.9305
272	19.6258	32.6815	23.6035	20.0507	24.4908	13.8181	18.7641	12.3329	9.80491	30.8062
272.45	19.7202	32.7388	23.7699	19.9861	24.236	13.7202	18.7199	12.3051	9.7614	30.9085
272.9	19.7837	32.801	23.8504	20.1925	23.864	13.6567	18.7511	12.2918	9.73109	30.9583
273.35	19.8374	32.8727	23.9056	20.3895	23.5853	13.596	18.7768	12.3209	9.70192	31.03
273.8	19.8628	32.953	23.793	20.5258	23.4352	13.5915	18.742	12.3743	9.67553	31.1313
274.25	19.8403	32.932	23.4908	20.6858	23.3881	13.6495	18.7523	12.3932	9.64741	31.1247
274.7	19.8164	32.8784	23.3063	20.7153	23.3623	13.6455	18.7153	12.3872	9.58994	31.2031
275.15	19.7921	32.8086	23.2662	20.7374	23.3653	13.6607	18.6984	12.3472	9.51478	31.2757
275.6	19.7554	32.7398	23.373	20.779	23.3619	13.6584	18.7053	12.3115	9.41791	31.336
276.05	19.7066	32.6967	23.5825	20.6915	23.259	13.6797	18.6977	12.3316	9.40012	31.3494
276.5	19.6583	32.6748	23.7856	20.6105	23.2041	13.7197	18.6445	12.3624	9.4313	31.3035
276.95	19.6271	32.6767	23.8486	20.5326	23.1902	13.7674	18.5588	12.4119	9.47586	31.2279
277.4	19.6245	32.6346	23.7868	20.4699	23.2071	13.8396	18.4836	12.4291	9.55705	31.095
277.85	19.6753	32.6279	23.706	20.499	23.2651	13.8109	18.3727	12.3963	9.60075	30.9783
278.3	19.7317	32.603	23.4706	20.5152	23.2937	13.7685	18.3786	12.3704	9.63795	30.898
278.75	19.7709	32.5447	23.2417	20.6341	23.2937	13.7102	18.4068	12.3262	9.63613	30.8569
279.2	19.8128	32.4424	23.1274	20.7634	23.2535	13.6429	18.4344	12.2856	9.59768	30.8617
279.65	19.7997	32.2856	23.0496	20.8821	23.2215	13.6703	18.5048	12.2847	9.54624	30.8808
280.1	19.767	32.1804	23.0934	21.0043	23.1877	13.7218	18.4917	12.2796	9.45291	30.8607
280.55	19.6851	32.0599	23.2008	20.9722	23.1193	13.7687	18.5354	12.264	9.46046	30.832
281	19.5808	32.0981	23.2422	20.9335	23.0368	13.8135	18.5688	12.2728	9.5077	30.8626
281.45	19.4732	32.1259	23.1882	20.8455	22.973	13.8258	18.5725	12.2348	9.56957	30.8808
281.9	19.382	32.1125	23.1373	20.7644	22.9337	13.8091	18.62	12.1346	9.65525	30.9315
282.35	19.366	32.1823	22.9909	20.7158	22.9466	13.7898	18.5443	12.0875	9.66759	30.9783
282.8	19.3634	32.188	22.8282	20.5534	22.9344	13.7176	18.4758	12.0495	9.64168	30.9831
283.25	19.3915	32.3276	22.7244	20.4749	22.8783	13.6221	18.4502	12.0313	9.63469	30.9984
283.7	19.4065	32.4118	22.6293	20.4763	22.809	13.551	18.4078	12.1616	9.58526	31.0089
284.15	19.4135	32.407	22.6148	20.5465	22.7381	13.3792	18.4069	12.239	9.55647	30.9927
284.6	19.4092	32.407	22.6381	20.6481	22.7999	13.2501	18.4106	12.2841	9.52941	30.9372
285.05	19.4339	32.2569	22.7149	20.6535	22.8623	13.1552	18.3282	12.3157	9.44009	30.8875
285.5	19.4609	32.2062	22.7786	20.531	22.9329	13.0706	18.2332	12.2555	9.38396	30.8158
285.95	19.3497	32.2167	22.9158	20.3216	22.97	13.194	18.207	12.2314	9.34255	30.7412
286.4	19.2425	32.2014	23.0181	20.2975	22.8686	13.3242	18.1645	12.1963	9.3502	30.7087
286.85	19.069	32.1756	23.0619	20.3665	22.8093	13.4216	18.2144	12.2253	9.41179	30.6255
287.3	18.9259	32.0828	23.0837	20.4661	22.7747	13.5217	18.2942	12.2592	9.51526	30.5538
287.75	19.0366	31.9815	23.0066	20.6426	22.7861	13.5461	18.3111	12.2581	9.59577	30.482
288.2	19.1437	31.8677	23.0188	20.6782	22.885	13.5691	18.3365	12.2878	9.61155	30.3969
288.65	19.2815	31.7854	23.0816	20.6151	22.9644	13.6039	18.353	12.2922	9.62456	30.3443
289.1	19.4195	31.752	23.2264	20.5787	23.0007	13.5732	18.3093	12.2852	9.62312	30.2879
289.55	19.3331	31.752	23.3038	20.4606	23.0189	13.5194	18.2819	12.4091	9.62943	30.4084
290	19.2603	31.7491	23.3334	20.4422	23.028	13.4564	18.2432	12.5339	9.67725	30.5815
290.45	19.201	31.8237	23.2833	20.5205	23.0326	13.4131	18.1621	12.6008	9.67533	30.7555
290.9	19.1127	31.8753	23.0925	20.6074	23.0289	13.4676	18.1506	12.7142	9.62465	30.9678
291.35	19.1204	31.8084	22.9884	20.7522	23.0205	13.532	18.1748	12.609	9.59568	30.9774
291.8	19.1178	31.8189	22.9235	20.7573	22.9843	13.5971	18.2387	12.5255	9.57474	30.8837
292.25	19.1035	31.7749	22.9781	20.6844	22.9462	13.646	18.3121	12.4962	9.59023	30.7976
292.7	19.0723	31.7405	23.1203	20.5059	22.9019	13.6378	18.342	12.3976	9.61815	30.6111
293.15	19.1688	31.8552	23.2086	20.2218	22.8368	13.6064	18.3043	12.4465	9.5865	30.4208
293.6	19.2469	31.8725	23.2183	19.9346	22.7746	13.602	18.2152	12.4149	9.55504	30.3051
294.05	19.2932	31.8428	23.0903	19.7294	22.7393	13.5722	18.1685	12.4336	9.5449	30.1923
294.5	19.3879	31.7988	22.8914	19.7083	22.7508	13.5897	18.1482	12.4933	9.5843	30.1607
294.95	19.3812	31.6152	22.8022	19.847	22.774	13.6482	18.1563	12.4929	9.66262	30.0986
295.4	19.3864	31.4995	22.6818	20.1178	22.8382	13.6689	18.1709	12.5443	9.68385	29.9905
295.85	19.4542	31.5129	22.5919	20.3481	22.9224	13.7424	18.1823	12.469	9.65085	29.9264
296.3	19.4988	31.5272	22.5746	20.4576	22.9831	13.7668	18.1615	12.3972	9.57263	29.8452
296.75	19.4991	31.6583	22.525	20.5995	23.0629	13.7719	18.1415	12.3428	9.50512	29.9284
297.2	19.5033	31.7883	22.5586	20.6523	23.0702	13.7623	18.171	12.3016	9.49795	30.0096
297.65	19.4444	31.7491	22.6025	20.7256	22.971	13.7342	18.1408	12.2842	9.55427	30.0029
298.1	19.3708	31.7443	22.6526	20.7921	22.9437	13.6843	18.1458	12.2579	9.62341	29.9972
298.55	19.3284	31.6573	22.5839	20.7159	22.9132	13.6113	18.1701	12.1971	9.64397	29.9685
299	19.3075	31.5378	22.5205	20.6395	22.9349	13.5661	18.1587	12.1179	9.63374	30.0119
299.45	19.3463	31.686	22.5163	20.4978	23.0219	13.5222	18.1869	12.0977	9.58659	30.1921
299.9	19.3842	31.7902	22.4942	20.4007	22.9936	13.5309	18.2359	12.0669	9.52061	30.4162
300.35	19.3607	31.9021	22.5987	20.3475	22.944	13.5387	18.2649	12.084	9.50837	30.5916
300.8	19.3361	32.0197	22.6215	20.3284	22.8849	13.5426	18.3186	12.1086	9.49948	30.7222
301.25	19.2479	31.8792	22.6734	20.3565	22.8255	13.4151	18.3678	12.1362	9.50062	30.6396
301.7	19.1955	31.7654	22.6934	20.4274	22.782	13.2758	18.3396	12.1808	9.52692	30.4203
302.15	19.2024	31.686	22.6368	20.4733	22.7502	13.132	18.2936	12.2216	9.53189	30.176
302.6	19.1803	31.6152	22.6847	20.5107	22.6976	13.0095	18.2188	12.2635	9.57187	29.9236
303.05	19.2339	31.5703	22.6218	20.5445	22.6379	13.1025	18.1317	12.2593	9.50282	29.8213
303.5	19.2952	31.4756	22.5969	20.4465	22.6284	13.1894	18.1071	12.3004	9.43952	29.8327
303.95	19.3438	31.3761	22.6644	20.3964	22.6432	13.3254	18.1082	12.3313	9.37115	29.8356
304.4	19.4079	31.1505	22.5931	20.368	22.6596	13.4129	18.1267	12.3577	9.25745	29.8184
304.85	19.4246	31.0109	22.6172	20.3254	22.6879	13.4252	18.1737	12.3982	9.35766	29.7658
305.3	19.3761	30.8971	22.6114	20.4537	22.6926	13.4254	18.1396	12.3477	9.45061	29.7955
305.75	19.3166	30.767	22.5497	20.5263	22.6327	13.4235	18.1396	12.2949	9.58047	29.8892
306.2	19.2529	30.8875	22.6778	20.4779	22.6223	13.5794	18.1061	12.2668	9.72133	30.0689
306.65	19.1842	30.9669	22.7098	20.4072	22.6196	13.6886	18.0366	12.2593	9.73682	30.2525
307.1	19.1697	31.095	22.795	20.1327	22.6453	13.827	18.0771	12.286	9.73089	30.2803
307.55	19.1687	31.248	22.9269	19.8955	22.7353	13.9025	18.0431	12.3464	9.68471	30.2946
308	19.1392	31.2289	22.9249	19.7769	22.7793	13.7489	18.007	12.3678	9.71578	30.2458
308.45	19.131	31.2404	22.9543	19.6896	22.8215	13.645	18.0024	12.3426	9.78387	30.133
308.9	19.1341	31.182	22.9102	19.7435	22.8224	13.5167	17.9392	12.3149	9.85349	30.0794
309.35	19.1521	31.1256	22.7155	19.76	22.7895	13.4378	17.8863	12.2348	9.91211	29.9666
309.8	19.241	31.1897	22.5986	19.7977	22.7459	13.4784	17.8857	12.1519	9.83848	29.8633
310.25	19.3317	31.2059	22.4678	19.8787	22.6715	13.5084	17.8756	12.1272	9.77029	29.8107
310.7	19.3836	31.3025	22.3622	19.8969	22.6041	13.4973	17.8628	12.1304	9.71913	29.7419
311.15	19.4218	31.3331	22.3962	20.0107	22.5063	13.481	17.9319	12.1719	9.68901	29.7209
311.6	19.4205	31.249	22.3127	20.0802	22.4383	13.4374	17.9772	12.2325	9.70728	29.6912
312.05	19.4063	31.2289	22.2944	20.111	22.3925	13.3857	18.0237	12.2574	9.67859	29.7668
312.5	19.4018	31.139	22.269	20.2497	22.3956	13.4283	18.1421	12.2525	9.64454	29.8633
312.95	19.3775	31.2308	22.1986	20.287	22.505	13.4605	18.1923	12.2794	9.57607	29.9168
313.4	19.3359	31.335	22.2199	20.2889	22.6048	13.492	18.2151	12.3298	9.54786	29.9874
313.85	19.2956	31.3666	22.3138	20.3079	22.7155	13.5233	18.2297	12.3907	9.54519	29.9424
314.3	19.2374	31.4335	22.4374	20.2053	22.748	13.4964	18.122	12.4623	9.53945	29.9356
314.75	19.1969	31.2356	22.5571	20.2462	22.7033	13.482	18.0369	12.4633	9.59941	29.9807
315.2	19.185	31.0558	22.6398	20.3462	22.6416	13.4887	18.0104	12.3991	9.5995	29.9855
315.65	19.1725	30.9305	22.5012	20.4762	22.5456	13.5614	17.9784	12.3488	9.59013	30.0133
316.1	19.2013	30.7785	22.297	20.6773	22.5061	13.6687	18.0342	12.3047	9.58	29.998
316.55	19.2539	30.8349	22.1089	20.7152	22.5049	13.7599	18.0719	12.2464	9.54519	29.9931
317	19.2918	30.8827	22.021	20.7462	22.5436	13.849	18.0821	12.2394	9.53935	30.059
317.45	19.3427	30.8693	22.0931	20.697	22.6104	13.7937	18.0966	12.2514	9.48858	30.0553
317.9	19.3548	30.9114	22.3118	20.5737	22.6305	13.7266	18.0762	12.2026	9.44277	29.9769
318.35	19.3213	30.833	22.5344	20.497	22.6254	13.669	18.0836	12.19	9.40557	29.8632
318.8	19.3075	30.7594	22.6211	20.3509	22.6035	13.6246	18.0799	12.1982	9.38903	29.6549
319.25	19.2685	30.7823	22.6335	20.2497	22.5713	13.6822	18.0706	12.1366	9.47203	29.6013
319.7	19.2746	30.7938	22.5367	20.2292	22.5277	13.7391	18.0778	12.1869	9.54968	29.6415
320.15	19.2825	30.8521	22.4302	20.1537	22.4568	13.8465	18.0354	12.2411	9.5886	29.6451
320.6	19.2563	31.0223	22.3811	20.1263	22.3691	13.8938	18.0077	12.2509	9.59768	29.7635
321.05	19.2309	31.1027	22.3516	20.0334	22.2775	13.9387	18.0216	12.2929	9.58439	29.7587
321.5	19.1211	31.0969	22.3733	19.8716	22.167	13.9381	18.0185	12.2906	9.59434	29.8582
321.95	19.0407	31.0032	22.3975	19.8128	22.0883	13.8465	18.0543	12.2835	9.63115	30.0766
322.4	18.953	30.789	22.419	19.7537	22.0325	13.8007	18.0505	12.3342	9.69551	30.2003
322.85	18.8932	30.6761	22.4329	19.7624	22.0167	13.6899	17.9789	12.413	9.72401	30.3973
323.3	18.934	30.6436	22.4222	19.8306	22.2139	13.6347	17.9352	12.4503	9.73625	30.3543
323.75	19.0056	30.7651	22.4095	19.852	22.4141	13.6089	17.8795	12.5099	9.75346	30.1739
324.2	19.1139	30.8971	22.3732	19.908	22.5897	13.5804	17.8811	12.4527	9.74017	30.0223
324.65	19.2113	30.9468	22.3563	19.8949	22.7448	13.6295	17.9472	12.3657	9.71569	29.7374
325.1	19.2692	31.0023	22.2501	19.9122	22.727	13.7885	17.9911	12.3152	9.69819	29.639
325.55	19.2695	30.9965	22.1754	19.9785	22.7235	13.9491	18.0176	12.2643	9.68002	29.6379
326	19.2463	31.0118	22.2081	19.997	22.7678	14.1022	18.0111	12.3063	9.67352	29.5499
326.45	19.2317	31.0099	22.2786	20.0717	22.7551	14.1901	17.9494	12.3455	9.70116	29.5973
326.9	19.2081	30.941	22.4511	20.0229	22.762	13.9828	17.886	12.383	9.73902	29.5548
327.35	19.2076	30.8674	22.5951	19.9504	22.7154	13.8102	17.8496	12.3545	9.71053	29.4785
327.8	19.243	30.7909	22.5934	19.9146	22.5807	13.6573	17.832	12.3012	9.70135	29.6059
328.25	19.2437	30.7336	22.5373	19.8995	22.4739	13.5607	17.8469	12.2631	9.66577	29.7219
328.7	19.2421	30.636	22.4964	19.9443	22.3421	13.6483	17.8725	12.233	9.59004	29.8331
329.15	19.2382	30.5299	22.4182	19.9331	22.244	13.6982	17.8948	12.2793	9.63355	29.9615
329.6	19.1818	30.4161	22.4299	19.871	22.2337	13.7281	17.9325	12.3295	9.64349	29.9494
330.05	19.1295	30.3941	22.4505	19.8095	22.2992	13.7411	17.9663	12.2824	9.66969	29.9733
330.5	19.0622	30.4897	22.4079	19.7775	22.4013	13.7648	17.9938	12.1976	9.68719	30.0442
330.95	18.9882	30.5528	22.466	19.8233	22.5156	13.7945	18.0245	12.072	9.62111	30.0951
331.4	18.9635	30.6389	22.4652	19.8745	22.5912	13.8801	17.9916	11.9567	9.56919	30.189
331.85	18.9988	30.6197	22.3729	19.9503	22.5918	13.9336	17.9647	12.0469	9.5842	30.1768
332.3	19.0699	30.5805	22.3236	19.9855	22.5737	13.9478	17.9781	12.179	9.63938	30.0704
332.75	19.1447	30.5958	22.2057	19.9857	22.5228	13.94	17.9691	12.3345	9.73558	29.9326
333.2	19.1898	30.4906	22.1604	20.0403	22.4752	13.8183	17.9925	12.4667	9.86228	29.736
333.65	19.1909	30.4094	22.3333	19.9965	22.4324	13.6881	17.9725	12.4532	9.84641	29.6438
334.1	19.1896	30.285	22.4606	19.9574	22.4037	13.5542	17.8806	12.4139	9.82279	29.6559
334.55	19.1764	30.1598	22.5575	19.9843	22.4412	13.4663	17.8105	12.3443	9.76828	29.6448
335	19.1755	30.1856	22.5916	19.9827	22.4789	13.4247	17.7593	12.2828	9.68614	29.7901
335.45	19.2645	30.2114	22.4588	20.0174	22.564	13.4375	17.7809	12.2461	9.66769	29.8407
335.9	19.3263	30.3128	22.2206	20.0589	22.6426	13.4535	17.8556	12.2254	9.66874	29.8654
336.35	19.4295	30.3998	21.9757	19.967	22.6257	13.3933	17.9433	12.2443	9.69915	30.0084
336.8	19.52	30.4428	21.7775	19.8452	22.6985	13.3416	17.9917	12.2302	9.7286	29.9308
337.25	19.5198	30.483	21.5586	19.7514	22.7052	13.258	18.0303	12.2336	9.77622	29.8992
337.7	19.5328	30.4505	21.6433	19.6631	22.7148	13.1786	18.0243	12.2122	9.82499	29.8647
338.15	19.5021	30.483	21.7631	19.621	22.7764	13.199	18.0309	12.1643	9.84689	29.8165
338.6	19.4907	30.4811	21.8162	19.6171	22.643	13.256	18.0844	12.1665	9.83159	29.9068
339.05	19.4778	30.4954	22.0962	19.6116	22.5487	13.3578	18.0731	12.1533	9.81065	30.0123
339.5	19.4701	30.571	22.1904	19.6839	22.4668	13.4958	18.0871	12.1705	9.76436	30.1215
339.95	19.4976	30.5184	22.2713	19.7905	22.3679	13.6201	18.0433	12.2108	9.7329	30.136
340.4	19.5333	30.4954	22.3638	19.936	22.3801	13.7286	17.9653	12.2714	9.76303	30.114
340.85	19.4597	30.4859	22.1618	20.0847	22.3815	13.8399	17.9373	12.3463	9.78234	29.9718
341.3	19.3826	30.417	21.9802	20.1351	22.372	13.9379	17.9416	12.4761	9.75471	29.803
341.75	19.2483	30.4065	21.9071	20.2062	22.3816	14.0041	17.9738	12.5789	9.72573	29.7136
342.2	19.0656	30.4046	21.9847	20.1888	22.384	14.0209	18.0421	12.6576	9.68012	29.646
342.65	18.9904	30.3577	22.1901	20.1426	22.3679	13.9438	18.0705	12.6873	9.663	29.6897
343.1	18.9347	30.3147	22.3891	20.1098	22.3251	13.8175	18.0377	12.5794	9.73262	29.7221
343.55	18.9376	30.3099	22.4383	20.0171	22.2797	13.6988	18.0021	12.4713	9.78464	29.6968
344	18.9708	30.264	22.2555	19.9807	22.2551	13.5999	17.9446	12.3593	9.84479	29.7031
344.45	19.0013	30.1406	22.0719	19.9293	22.2831	13.5414	17.9463	12.3263	9.87692	29.7022
344.9	19.0107	30.0431	21.8676	19.8343	22.3335	13.5165	17.9668	12.3341	9.88533	29.7482
345.35	19.0052	29.8672	21.7355	19.7814	22.3839	13.4629	17.9965	12.3687	9.91851	29.8543
345.8	19.0085	29.7295	21.7574	19.6894	22.4141	13.4089	18.0233	12.3706	9.93926	29.8714
346.25	19.0184	29.7591	21.7788	19.6408	22.4247	13.3605	18.0095	12.471	9.97847	29.8941
346.7	19.0417	29.7868	21.8504	19.6682	22.4324	13.2918	18.035	12.6161	9.99635	29.9963
347.15	19.0375	29.8911	22.0016	19.6809	22.4369	13.2824	18.0263	12.7254	10.0282	30.0685
347.6	19.0069	29.9829	22.1237	19.6948	22.4508	13.3306	17.9821	12.8608	10.0558	30.1905
348.05	18.9998	30.0202	22.2974	19.6588	22.44	13.4077	17.9474	12.7088	10.0622	30.2627
348.5	18.9839	30.0594	22.4643	19.5847	22.4441	13.5298	17.8747	12.5614	10.0753	30.1632
348.95	18.9977	30.0488	22.484	19.5087	22.4608	13.593	17.8577	12.4582	10.0231	30.02
349.4	19.0357	30.0785	22.4895	19.5456	22.4058	13.6022	17.9067	12.3737	9.96317	29.887
349.85	19.079	30.0689	22.4339	19.6528	22.3094	13.5957	17.9396	12.4565	9.92559	29.7588
350.3	19.1016	30.0689	22.271	19.7882	22.1688	13.5261	17.9871	12.5083	9.88916	29.6743
350.75	19.117	30.111	22.1301	19.9712	21.985	13.4944	17.9927	12.3986	9.9188	29.5701
351.2	19.1331	30.1187	21.9527	19.9563	21.903	13.4715	17.9414	12.2663	9.9473	29.4287
351.65	19.0905	30.2028	21.7852	19.885	21.7707	13.4312	17.9261	12.1342	9.95437	29.335
352.1	19.0952	30.177	21.8242	19.791	21.6846	13.4574	17.9079	11.9589	9.95457	29.2568
352.55	19.0992	30.1215	21.9639	19.5747	21.6458	13.4547	17.9185	12.0885	9.91153	29.2502
353	19.0772	30.0699	22.1638	19.4644	21.5835	13.4663	17.9793	12.2161	9.88667	29.2013
353.45	19.133	29.9647	22.4196	19.3611	21.7624	13.484	18.0092	12.3284	9.8554	29.2558
353.9	19.142	30.0173	22.4845	19.2641	21.9251	13.4864	18.0128	12.5338	9.84335	29.3394
354.35	19.1604	30.1607	22.5	19.2416	22.0622	13.4871	17.9795	12.5243	9.8729	29.3924
354.8	19.2358	30.263	22.469	19.1953	22.2042	13.4795	17.9317	12.5394	9.89633	29.5175
355.25	19.2301	30.3596	22.3279	19.153	22.2162	13.5331	17.9472	12.5259	9.95208	29.405
355.7	19.2535	30.4151	22.2549	19.135	22.2391	13.578	17.9845	12.4613	9.99119	29.2873
356.15	19.252	30.307	22.1026	19.1187	22.2845	13.687	18.071	12.4197	9.99549	29.1964
356.6	19.1898	30.2124	21.9777	19.1378	22.2741	13.8157	18.1365	12.3498	9.99492	29.0958
357.05	19.1688	30.1598	21.9109	19.1569	22.2503	13.8497	18.1021	12.2898	9.94634	29.1024
357.5	19.1326	30.0259	21.8866	19.1644	22.2138	13.8945	18.083	12.2145	9.86162	29.0933
357.95	19.1165	29.936	21.9335	19.174	22.1325	13.8869	18.0247	12.1972	9.81055	29.0696
358.4	19.1122	29.8777	21.9284	19.122	22.0585	13.8347	17.9737	12.1742	9.76656	29.0671
358.85	19.1206	29.7381	21.8889	19.077	22.0188	13.879	17.9558	12.211	9.77201	29.0758
359.3	19.1382	29.5172	21.85	19.012	21.9807	13.8572	17.9413	12.2804	9.8773	29.0698
359.75	19.1693	29.3441	21.7817	18.9281	21.9625	13.7214	18.0335	12.3073	9.92052	29.1086
360.2	19.2198	29.1347	21.7734	18.9488	21.9835	13.6102	18.144	12.3453	9.95045	29.1012
360.65	19.2402	29.0161	21.8509	18.9701	21.9567	13.3902	18.2927	12.3293	9.98383	29.0793
361.1	19.2589	29.1433	21.7868	19.0004	21.9258	13.2443	18.4093	12.3398	9.92693	29.0916
361.55	19.2227	29.2618	21.7778	19.0252	21.9225	13.3162	18.3377	12.3601	9.94586	29.041
362	19.1843	29.4244	21.7969	18.9985	21.9282	13.4054	18.2393	12.4224	9.96059	29.1148
362.45	19.1667	29.564	21.7154	18.9954	21.9509	13.5579	18.0774	12.4704	9.92913	29.2024
362.9	19.1321	29.6166	21.7745	18.9787	21.9883	13.6574	17.9125	12.4843	9.91823	29.2877
363.35	19.1372	29.6214	21.7697	19.0184	22.0045	13.6397	17.8383	12.4687	9.83694	29.4072
363.8	19.1132	29.5984	21.7617	19.0452	22.0175	13.5632	17.7953	12.3927	9.82279	29.3403
364.25	19.0717	29.5363	21.8684	19.0781	22.0407	13.4892	17.8199	12.3464	9.83847	29.2308
364.7	19.0202	29.3708	21.9897	19.0591	22.0778	13.4713	17.8819	12.3241	9.86908	29.0771
365.15	18.9407	29.3202	22.1117	18.9771	22.1139	13.515	17.9449	12.3461	9.92865	28.9006
365.6	18.8918	29.2857	22.1659	18.9516	22.1249	13.6179	17.999	12.3845	10.0082	28.806
366.05	18.8416	29.2389	22.1783	18.9101	22.1358	13.7184	18.0005	12.4365	10.0761	28.7891
366.5	18.8313	29.3498	22.1682	19.054	22.1251	13.749	17.991	12.4459	10.1552	28.8185
366.95	18.8863	29.3192	22.2715	19.2919	22.1317	13.7182	18.0091	12.5673	10.2593	28.8592
367.4	18.9243	29.258	22.3905	19.4538	22.1646	13.6865	18.0049	12.6783	10.2088	28.8915
367.85	18.9738	29.2676	22.3716	19.6735	22.1865	13.6094	18.0012	12.7543	10.1361	28.8956
368.3	19.0323	29.2465	22.2771	19.7885	22.1763	13.6393	17.9696	12.8182	10.0214	28.9427
368.75	19.0272	29.3909	22.069	19.8179	22.1778	13.6776	17.8929	12.6184	9.89011	28.9615
369.2	19.0211	29.6424	21.8915	19.8848	22.124	13.6929	17.8363	12.4535	9.84268	28.9787
369.65	19.0227	29.8461	21.8926	19.7695	22.0705	13.7479	17.8405	12.2837	9.83254	28.9869
370.1	18.9971	29.979	21.8651	19.6072	22.0429	13.6931	17.865	12.1746	9.88342	28.868
370.55	19.0197	29.959	21.8351	19.4171	21.9698	13.6469	17.8854	12.2127	9.9953	28.9163
371	19.0637	29.7964	21.7772	19.2439	21.9486	13.5547	17.8895	12.2263	10.0694	29.0392
371.45	19.0813	29.6357	21.6178	19.1936	21.9245	13.4835	17.897	12.2336	10.1692	29.1498
371.9	19.0855	29.4961	21.5419	19.1891	21.9051	13.4677	17.8893	12.2293	10.2283	29.358
372.35	19.0395	29.4282	21.4646	19.2723	21.9237	13.455	17.9384	12.2223	10.16	29.3244
372.8	18.9648	29.4034	21.355	19.3147	21.9218	13.533	17.9964	12.2166	10.1411	29.1793
373.25	18.9063	29.3603	21.3433	19.369	21.9795	13.5687	17.9601	12.2706	10.0467	29.0492
373.7	18.8106	29.3269	21.3343	19.3825	22.0307	13.6395	17.9615	12.3098	9.95112	28.8881
374.15	18.7366	29.1404	21.3544	19.3434	22.0429	13.7051	17.8993	12.339	9.91565	28.8932
374.6	18.7113	29.0103	21.3915	19.3103	22.0441	13.6812	17.8339	12.3584	9.86917	28.9927
375.05	18.7028	28.9252	21.308	19.2509	21.9339	13.6775	17.8197	12.3663	9.90637	29.1056
375.5	18.8276	28.8277	21.1807	19.2254	21.9683	13.6017	17.7755	12.3336	9.90054	29.2698
375.95	18.9411	28.9979	21.0321	19.2745	22.0506	13.5254	17.741	12.2999	9.88218	29.3093
376.4	19.0038	29.0773	20.9213	19.283	22.1518	13.5415	17.6979	12.2577	9.85138	29.3442
376.85	19.058	29.1299	20.8735	19.2528	22.2975	13.5403	17.6739	12.1952	9.75059	29.3479
377.3	19.0622	29.2016	20.8679	19.1859	22.2066	13.5697	17.6565	12.1837	9.75996	29.349
377.75	19.111	29.1079	20.9306	18.9842	22.0724	13.6089	17.6919	12.1529	9.80634	29.5307
378.2	19.162	29.0935	20.9785	18.7301	21.9447	13.593	17.7524	12.1922	9.87587	29.6025
378.65	19.1798	29.1012	21.0295	18.5274	21.8055	13.5989	17.8081	12.2118	9.97025	29.6998
379.1	19.1397	29.0591	20.9932	18.3585	21.7605	13.591	17.8473	12.2113	10.0003	29.6768
379.55	19.0642	29.0161	20.9776	18.2611	21.7327	13.5862	17.8569	12.2514	10.0003	29.4212
380	18.9874	28.8918	21.012	18.403	21.6573	13.5864	17.8736	12.2517	9.97933	29.2841
380.45	18.9592	28.7866	21.0643	18.5932	21.6405	13.5917	17.8498	12.3009	9.96021	29.1342
380.9	18.922	28.7158	21.3516	18.7953	21.6034	13.6008	17.8382	12.35	9.9189	29.0838
381.35	18.8824	28.7349	21.5532	18.9958	21.5599	13.6188	17.8096	12.379	9.86898	29.1371
381.8	18.8908	28.843	21.7272	19.0775	21.5631	13.6494	17.7536	12.3892	9.81285	29.1327
382.25	18.8472	28.8717	21.9445	19.0475	21.5503	13.6741	17.7413	12.3525	9.7548	29.1786
382.7	18.8333	28.9109	21.8923	19.0234	21.5537	13.7073	17.7384	12.34	9.74782	29.215
383.15	18.8152	28.887	21.8426	19.0304	21.5693	13.6961	17.8116	12.3512	9.7854	29.3117
383.6	18.7568	28.7952	21.6799	19.0292	21.601	13.7024	17.8756	12.3734	9.84163	29.4135
384.05	18.7251	28.7627	21.3468	19.1285	21.5727	13.656	17.924	12.5256	9.88916	29.4266
384.5	18.6898	28.7875	21.1795	19.1918	21.5396	13.6205	17.9686	12.6531	9.88878	29.405
384.95	18.6664	28.8353	21.0305	19.1884	21.5009	13.6054	17.9161	12.713	9.95265	29.3351
385.4	18.6751	28.929	21.0204	19.2044	21.4837	13.5324	17.8908	12.7968	10.0392	29.2564
385.85	18.7323	28.9616	21.1168	19.1786	21.5304	13.5223	17.8751	12.6475	10.1568	29.2707
386.3	18.808	28.8631	21.1309	19.2408	21.5836	13.47	17.8283	12.5088	10.3102	29.337
386.75	18.9007	28.6967	21.26	19.3999	21.6402	13.4216	17.7872	12.4161	10.2501	29.3888
387.2	18.9497	28.5399	21.3451	19.4927	21.6333	13.5346	17.7336	12.2787	10.14	29.4625
387.65	18.903	28.4959	21.45	19.5448	21.5969	13.6527	17.6358	12.2696	9.99186	29.4589
388.1	18.828	28.5265	21.6025	19.4692	21.5859	13.8187	17.5995	12.2174	9.86209	29.3731
388.55	18.7324	28.6221	21.5049	19.3155	21.5961	13.9823	17.5975	12.2388	9.86879	29.2633
389	18.6371	28.7368	21.4308	19.1589	21.6139	13.9177	17.5905	12.2827	9.89021	29.1733
389.45	18.6096	28.7732	21.3473	19.0584	21.6459	13.7923	17.6085	12.3375	9.94013	29.0523
389.9	18.6298	28.7292	21.238	19.0209	21.6748	13.6569	17.5734	12.4639	9.88055	29.0517
390.35	18.6291	28.7168	21.2563	19.0069	21.6724	13.5039	17.5	12.4578	9.80835	29.0964
390.8	18.6462	28.6431	21.2148	19.0445	21.6679	13.4273	17.4399	12.4556	9.75289	29.086
391.25	18.6334	28.6125	21.1807	19.0811	21.6502	13.3943	17.4195	12.4109	9.70383	29.1639
391.7	18.5766	28.7034	21.2097	19.1361	21.6099	13.2912	17.4286	12.323	9.79344	29.1581
392.15	18.5418	28.7196	21.3035	19.2214	21.5599	13.2505	17.5162	12.2766	9.86257	29.1832
392.6	18.523	28.7655	21.5197	19.31	21.5148	13.253	17.5869	12.2052	9.90006	29.1967
393.05	18.53	28.7933	21.6876	19.3206	21.4782	13.2597	17.6192	12.1411	9.90513	29.0427
393.5	18.5493	28.7445	21.7464	19.2543	21.4473	13.4081	17.6656	12.0786	9.84699	28.8238
393.95	18.5816	28.7569	21.6866	19.1156	21.4171	13.5185	17.6562	12.0204	9.8357	28.4538
394.4	18.5855	28.733	21.4681	18.9513	21.4316	13.5951	17.6631	12.009	9.89489	28.1211
394.85	18.5651	28.6584	21.2636	18.8292	21.4466	13.6513	17.6647	12.0372	9.94682	27.9519
395.3	18.5517	28.6211	21.1261	18.8566	21.4515	13.5869	17.6117	12.0853	9.97532	27.86
395.75	18.5117	28.5982	21.1063	18.9254	21.4644	13.524	17.5592	12.1637	9.95055	27.8934
396.2	18.5048	28.5752	21.1627	19.012	21.4263	13.4663	17.4728	12.2079	9.86181	27.9306
396.65	18.4939	28.58	21.2684	19.1465	21.3987	13.3952	17.4005	12.2211	9.80223	27.9889
397.1	18.4933	28.6116	21.3482	19.0787	21.3619	13.3843	17.375	12.2338	9.79296	28.0464
397.55	18.5262	28.5992	21.3248	18.9853	21.3295	13.3501	17.363	12.2308	9.81524	28.0739
398	18.5387	28.5686	21.401	18.8548	21.2799	13.3464	17.3605	12.2553	9.83522	28.1508
398.45	18.5777	28.5676	21.3931	18.6627	21.2165	13.3359	17.3628	12.2758	9.84115	28.1773
398.9	18.5708	28.5054	21.3256	18.5754	21.1957	13.3011	17.35	12.2966	9.8116	28.2681
399.35	18.5411	28.3725	21.3383	18.5279	21.2191	13.2801	17.3417	12.2971	9.90637	28.4437
399.8	18.4755	28.3171	21.1467	18.5171	21.2884	13.2338	17.4058	12.2476	10.0171	28.5755
400.25	18.4117	28.1669	21.031	18.5429	21.3659	13.2807	17.4676	12.2183	10.1229	28.733
400.7	18.3741	28.0694	20.9986	18.5726	21.4316	13.3158	17.5175	12.1596	10.23	28.7919
401.15	18.3371	28.0378	20.913	18.5741	21.4461	13.3472	17.5406	12.1104	10.0904	28.7899
401.6	18.3467	28.0177	20.9385	18.5866	21.4399	13.3727	17.4979	12.0979	9.98861	28.78
402.05	18.3109	28.1201	20.9271	18.6177	21.4052	13.3464	17.307	12.083	9.90455	28.7492
402.5	18.3106	28.1468	21.0735	18.708	21.3588	13.3357	17.1386	12.0958	9.82528	28.8187
402.95	18.3083	28.2252	21.2305	18.7915	21.3335	13.3995	16.9994	12.0913	9.8336	28.8835
403.4	18.2805	28.1774	21.3573	18.8308	21.2994	13.4637	16.8646	12.0407	9.74696	28.9249
403.85	18.2926	28.1076	21.4565	18.8389	21.27	13.5063	17.0357	11.9896	9.6738	28.9433
404.3	18.2468	28.1009	21.1829	18.7223	21.2114	13.5641	17.1931	11.9101	9.62484	28.8328
404.75	18.1981	27.9855	20.8996	18.6405	21.1442	13.4864	17.3426	11.8984	9.59931	28.728
405.2	18.1914	28.0527	20.6291	18.5994	21.1141	13.4529	17.5442	11.9589	9.65076	28.662
405.65	18.1589	28.0989	20.4035	18.5639	21.1094	13.4169	17.5482	12.0303	9.66577	28.6382
406.1	18.1577	28.1585	20.4372	18.5902	21.1531	13.3662	17.56	12.1551	9.67122	28.7274
406.55	18.1852	28.3609	20.4603	18.5773	21.2052	13.3877	17.56	12.2419	9.70431	28.7968
407	18.1734	28.3568	20.4321	18.6623	21.2329	13.3621	17.4751	12.3061	9.73692	28.8489
407.45	18.202	28.3326	20.4505	18.744	21.259	13.3801	17.4612	12.3721	9.7811	28.8963
407.9	18.2458	28.2826	20.3996	18.8241	21.3261	13.4927	17.4355	12.3852	9.78923	28.8739
408.35	18.2751	28.1401	20.4311	18.9677	21.3665	13.6292	17.4384	12.3703	9.75566	28.8651
408.8	18.3547	28.1382	20.6573	18.8795	21.3933	13.7768	17.4658	12.3111	9.71177	28.8406
409.25	18.399	28.1641	20.8081	18.8249	21.4225	13.8893	17.4557	12.1854	9.7002	28.7914
409.7	18.4075	28.1583	21.0363	18.7629	21.3278	13.8172	17.395	12.0932	9.76427	28.7371
410.15	18.3982	28.1449	21.254	18.6259	21.2501	13.7059	17.2913	12.0374	9.83953	28.6396
410.6	18.3447	28.0914	21.2478	18.6206	21.2282	13.5819	17.2275	12.0539	9.89709	28.4595
411.05	18.307	28.0369	21.2505	18.5985	21.193	13.4488	17.137	12.119	9.91144	28.2942
411.5	18.3106	28.0139	21.1303	18.6224	21.2432	13.3908	17.1587	12.1562	9.84125	28.1763
411.95	18.3177	28.0053	20.9367	18.678	21.2779	13.3342	17.2077	12.1975	9.80988	28.0988
412.4	18.3327	27.9843	20.8619	18.7144	21.2812	13.2994	17.2349	12.1356	9.79516	28.2485
412.85	18.3387	27.9518	20.8008	18.6844	21.2576	13.2694	17.2846	12.0783	9.80577	28.3685
413.3	18.2945	27.8905	20.821	18.61	21.1933	13.2535	17.2746	12.0265	9.83503	28.4764
413.75	18.2597	27.8198	20.9261	18.5414	21.1442	13.273	17.1831	11.9486	9.85722	28.6007
414.2	18.1984	27.7567	21.0375	18.5253	21.0743	13.3458	17.0739	11.9763	9.84737	28.6013
414.65	18.1631	27.6907	21.161	18.5918	21.0304	13.4578	17.005	11.9751	9.84067	28.6373
415.1	18.1736	27.6553	21.217	18.6547	21.0107	13.5782	16.9572	12.0216	9.8707	28.6932
415.55	18.1889	27.6438	21.1704	18.7137	20.9908	13.6513	17.0613	12.0618	9.8575	28.759
416	18.261	27.6285	21.0382	18.6559	20.9845	13.5976	17.1971	12.0782	9.89805	28.8193
416.45	18.3076	27.5884	20.8229	18.543	20.9521	13.5055	17.2825	12.1389	9.90666	28.7713
416.9	18.3206	27.5645	20.683	18.4205	20.8942	13.392	17.3572	12.1669	9.90427	28.6114
417.35	18.3275	27.5692	20.5621	18.3066	20.8451	13.2996	17.3315	12.2282	9.89709	28.3241
417.8	18.2851	27.618	20.5645	18.2894	20.7811	13.2952	17.2638	12.2502	9.83341	27.9712
418.25	18.2382	27.7414	20.6881	18.3072	20.8251	13.3028	17.2294	12.2628	9.79879	27.7433
418.7	18.2181	27.8274	20.8488	18.4623	20.9006	13.3298	17.1782	12.208	9.72477	27.5952
419.15	18.182	27.8619	21.0696	18.6052	20.9573	13.3296	17.2059	12.1284	9.68844	27.5323
419.6	18.1782	27.9269	21.098	18.7142	21.0333	13.2992	17.2655	12.0736	9.70833	27.5157
420.05	18.1674	27.924	21.0373	18.8093	21.0082	13.2375	17.2931	11.9926	9.71713	27.463
420.5	18.1482	27.9575	20.8138	18.6687	20.9849	13.161	17.3053	11.9783	9.78636	27.442
420.95	18.1413	27.9919	20.5397	18.5517	20.9673	13.1431	17.2622	11.9565	9.83102	27.4535
421.4	18.0777	27.9211	20.414	18.4597	20.9442	13.1432	17.3201	11.9364	9.81772	27.505
421.85	18.0546	27.8548	20.3147	18.2965	20.9186	13.154	17.396	11.901	9.76608	27.5543
422.3	18.0284	27.8353	20.3094	18.2678	20.9018	13.1995	17.5137	11.8761	9.66979	27.5533
422.75	18.027	27.8005	20.2987	18.2096	20.8812	13.2182	17.6222	11.8704	9.58468	27.53
423.2	18.0981	27.7498	20.2821	18.143	20.9787	13.1997	17.5096	11.8642	9.44937	27.5087
423.65	18.1174	27.7955	20.2826	18.222	21.1234	13.2889	17.3797	11.9192	9.37631	27.4958
424.1	18.1042	27.7159	20.2758	18.3064	21.2215	13.337	17.2385	11.9496	9.29436	27.4681
424.55	18.0565	27.7626	20.2954	18.4183	21.3638	13.3799	17.0743	11.8726	9.19328	27.4462
425	17.9667	27.899	20.2771	18.505	21.2398	13.4589	17.0211	11.7773	9.25946	27.3916
425.45	17.9426	28.0141	20.2777	18.5425	21.096	13.3852	17.0204	11.6672	9.31674	27.3219
425.9	17.9669	28.1364	20.2974	18.4776	20.9781	13.329	16.9998	11.5564	9.43436	27.3095
426.35	18.0444	28.165	20.3192	18.3474	20.8092	13.2601	17.0295	11.6492	9.56976	27.3457
426.8	18.1664	28.1681	20.2898	18.2204	20.7948	13.1881	17.0689	11.7415	9.63106	27.4111
427.25	18.2355	28.0556	20.2225	18.0834	20.7669	13.1789	17.0461	11.8104	9.67295	27.5222
427.7	18.2843	28.048	20.1435	18.1733	20.7397	13.1776	17.0555	11.8986	9.6629	27.7007
428.15	18.2518	28.0462	20.0634	18.3648	20.7443	13.1908	17.0663	11.8742	9.66128	27.8435
428.6	18.1616	28.0357	20.1132	18.5561	20.783	13.1459	17.1186	11.903	9.64942	27.9965
429.05	18.1126	28.0529	20.1915	18.7309	20.8477	13.1067	17.1997	11.9376	9.62609	28.1101
429.5	18.0753	28.0544	20.2546	18.7115	20.8212	13.0546	17.2681	11.9335	9.61681	28.1441
429.95	18.0981	27.9661	20.3386	18.6248	20.7493	13.0292	17.327	11.9262	9.60706	28.1756
430.4	18.1451	27.99	20.346	18.6159	20.6444	13.1005	17.3098	11.8901	9.59979	28.2455
430.85	18.1377	27.9824	20.3164	18.6358	20.5443	13.1655	17.3117	11.848	9.6367	28.3576
431.3	18.1082	27.9519	20.2885	18.7326	20.6384	13.2198	17.2945	11.8529	9.67916	28.4102
431.75	18.072	28.0357	20.2139	18.8325	20.7626	13.2471	17.2675	11.8937	9.69934	28.4212
432.2	18.055	27.9684	20.1602	18.8483	20.845	13.2379	17.2446	11.8859	9.69561	28.3277
432.65	18.0626	28.0443	20.1249	18.8867	20.9142	13.2032	17.1701	11.9019	9.64483	28.2694
433.1	18.0961	28.0772	20.1463	18.8615	20.8569	13.2541	17.1319	11.8967	9.55389	28.2183
433.55	18.1079	28.0795	20.1893	18.818	20.8085	13.2964	17.1041	11.8737	9.49795	28.2184
434	18.089	28.0589	20.2087	18.7905	20.8047	13.3316	17.1082	11.9427	9.45664	28.271
434.45	18.0776	27.9015	20.3249	18.6219	20.7864	13.3929	17.1688	12.0072	9.45444	28.1746
434.9	18.0616	27.7986	20.3853	18.495	20.8299	13.308	17.1936	12.0883	9.52539	28.2228
435.35	18.0527	27.681	20.4553	18.4075	20.8594	13.2117	17.1953	12.1535	9.58812	28.227
435.8	18.0763	27.6744	20.5382	18.2995	20.861	13.1147	17.1785	12.1361	9.67438	28.2689
436.25	18.0757	27.7895	20.4556	18.3035	20.86	13.0215	17.101	12.0829	9.7548	28.3753
436.7	18.0273	27.7763	20.3984	18.2745	20.7895	12.9904	17.0304	12.0216	9.7964	28.347
437.15	17.9621	27.8621	20.3317	18.2239	20.7362	12.992	16.9724	12.0505	9.80061	28.3456
437.6	17.8532	27.8675	20.2249	18.2732	20.7221	12.9938	16.9236	12.1069	9.81266	28.237
438.05	17.7863	27.7764	20.1747	18.3088	20.7399	12.9894	16.9159	12.2176	9.78942	28.197
438.5	17.764	27.8592	20.1015	18.4011	20.7981	13.0031	16.9404	12.3252	9.78196	28.2174
438.95	17.7898	27.8358	20.038	18.57	20.8275	13.0247	16.9744	12.2872	9.80787	28.2273
439.4	17.848	27.8656	20.0561	18.7103	20.8156	13.0747	17.0161	12.2108	9.75289	28.2637
439.85	17.8681	27.958	20.1011	18.8341	20.758	13.1355	17.031	12.0822	9.70813	28.1453
440.3	17.9201	27.9001	20.1711	18.8787	20.6602	13.2205	17.0649	11.9421	9.63728	27.9994
440.75	17.9576	27.8693	20.1749	18.7971	20.5851	13.313	17.1126	11.8931	9.5603	27.9097
441.2	17.9643	27.7956	20.1462	18.5471	20.5449	13.3571	17.1435	11.9065	9.57981	27.8787
441.65	17.9954	27.7278	20.1072	18.3461	20.5578	13.3982	17.2377	11.9827	9.61834	27.886
442.1	17.9666	27.7458	20.0326	18.2042	20.6461	13.3879	17.2433	12.0707	9.6739	27.924
442.55	17.8889	27.6807	20.0569	18.1509	20.8051	13.3495	17.2116	12.1323	9.68557	27.8446
443	17.853	27.6139	20.0412	18.2317	20.9349	13.3356	17.194	12.1973	9.62178	27.7609
443.45	17.8227	27.4414	20.1016	18.2717	21.0353	13.2898	17.1157	12.1732	9.56058	27.8462
443.9	17.8434	27.2825	20.1332	18.3073	21.0803	13.2629	17.0779	12.1409	9.49594	27.8711
444.35	17.9055	27.1862	20.1793	18.2793	20.9892	13.1953	17.0484	12.073	9.52683	27.9718
444.8	17.9181	27.1102	20.3204	18.2168	20.9102	13.1023	17.0203	11.9379	9.59692	27.9381
445.25	17.8838	27.1218	20.3871	18.1349	20.8308	13.0811	17.011	11.8318	9.64091	27.7318
445.7	17.7988	27.0989	20.5863	18.0524	20.7475	13.0421	17.0062	11.7083	9.67295	27.5159
446.15	17.785	27.0809	20.7014	18.0727	20.7006	13.0681	17.0306	11.6266	9.62131	27.2521
446.6	17.8357	27.0779	20.7826	18.1407	20.6339	13.132	17.0477	11.5667	9.56785	27.0757
447.05	17.9306	27.0445	20.8373	18.2533	20.5707	13.1327	17.0616	11.5555	9.4531	26.9911
447.5	18.068	27.0329	20.7834	18.3682	20.5198	13.1123	17.0869	11.5897	9.35872	26.9354
447.95	18.1058	27.0395	20.7555	18.3475	20.4873	13.0525	17.0719	11.645	9.29139	26.9309
448.4	18.09	27.0282	20.6787	18.2977	20.4865	12.9696	17.0641	11.7534	9.20801	27.0143
448.85	18.0818	27.015	20.6193	18.2301	20.4677	12.8984	17.0446	11.85	9.26452	27.0429
449.3	18.0283	26.9725	20.6141	18.0904	20.4159	12.9423	16.9947	11.8335	9.31645	27.1029
449.75	17.9279	26.9282	20.6207	18.0468	20.3688	13.0069	16.9477	11.7767	9.3808	27.126
450.2	17.8554	26.8865	20.6532	18.0043	20.3196	13.0927	16.8832	11.6943	9.47251	27.11
450.65	17.7308	26.847	20.6722	17.9513	20.2897	13.1918	16.867	11.5754	9.51153	27.2026
451.1	17.6114	26.8545	20.6368	18.0176	20.3246	13.2209	16.863	11.643	9.52138	27.3199
451.55	17.573	26.8363	20.5533	18.0612	20.3693	13.256	16.8943	11.7343	9.49833	27.5579
452	17.5317	26.8333	20.4456	18.122	20.4203	13.3057	16.9821	11.8065	9.52348	27.7372
452.45	17.5386	26.8402	20.3801	18.2054	20.4698	13.3532	17.0157	11.8797	9.56517	27.864
452.9	17.595	26.7965	20.3266	18.2438	20.4957	13.3826	17.0532	11.8376	9.62685	27.9579
453.35	17.6818	26.7722	20.368	18.1716	20.5077	13.3958	17.0535	11.7979	9.72458	27.9283
453.8	17.7496	26.7423	20.4528	18.0726	20.5181	13.3247	16.9823	11.7534	9.68748	27.9071
454.25	17.796	26.7392	20.447	17.9607	20.5442	13.2288	16.9263	11.6698	9.60954	27.8344
454.7	17.8145	26.7672	20.4573	17.8365	20.5761	13.1562	16.8871	11.6039	9.5514	27.7711
455.15	17.7714	26.8123	20.3738	17.9211	20.5962	13.0624	16.9022	11.5219	9.50646	27.7821
455.6	17.7601	26.8353	20.1519	18.0337	20.6694	13.0316	16.9617	11.4576	9.53199	27.9008
456.05	17.7555	26.8576	20.0313	18.1277	20.7065	13.0259	17.0237	11.5398	9.57942	28.0322
456.5	17.7366	27.027	20.0073	18.2312	20.7396	13.021	16.9989	11.6135	9.59491	28.1118
456.95	17.7431	27.2143	20.0244	18.2091	20.8134	12.9948	16.9418	11.6851	9.5231	28.158
457.4	17.7173	27.4993	20.2762	18.1505	20.729	12.9802	16.8542	11.7714	9.48628	28.122
457.85	17.7001	27.7763	20.4728	18.1343	20.6892	12.9706	16.7709	11.7494	9.45243	28.1415
458.3	17.7197	27.8015	20.5106	18.1245	20.6691	12.9107	16.8337	11.7709	9.42833	28.2057
458.75	17.7361	27.8134	20.5928	18.1578	20.6178	12.9534	16.8662	11.8035	9.50655	28.2284
459.2	17.7735	27.7693	20.5252	18.2221	20.6703	12.9489	16.9071	11.8178	9.52673	28.2226
459.65	17.7919	27.757	20.5437	18.2658	20.6822	12.9233	16.9632	11.8467	9.5319	28.1436
460.1	17.791	27.8479	20.603	18.2921	20.6503	12.9651	16.9699	11.8033	9.56737	28.0608
460.55	17.7642	27.8678	20.591	18.291	20.6316	12.9847	17.0609	11.7363	9.55896	28.0136
461	17.7366	27.8475	20.6068	18.4053	20.6125	13.0368	17.16	11.6797	9.60065	27.9823
461.45	17.7216	27.7859	20.5753	18.4818	20.615	13.1371	17.2283	11.6252	9.63555	27.9592
461.9	17.6949	27.7137	20.5795	18.564	20.6184	13.2146	17.2565	11.7356	9.62542	27.9085
462.35	17.7277	27.7328	20.6204	18.6529	20.5544	13.2203	17.1619	11.8962	9.62714	27.7857
462.8	17.7494	27.7306	20.5181	18.5166	20.4849	13.2392	17.0646	12.0323	9.57129	27.7155
463.25	17.7544	27.6628	20.3211	18.4276	20.3959	13.2067	16.9713	12.2026	9.52463	27.6566
463.7	17.7804	27.6249	20.0892	18.3004	20.3269	13.2067	16.8911	12.1286	9.50216	27.5671
464.15	17.7721	27.5726	19.8318	18.0824	20.3868	13.2372	16.8855	12.0109	9.45788	27.6041
464.6	17.755	27.6119	19.8763	17.9427	20.4192	13.2528	16.8676	11.9231	9.43789	27.5586
465.05	17.772	27.7123	20.0279	17.806	20.4584	13.2804	16.9139	11.7859	9.43541	27.5466
465.5	17.7545	27.7885	20.2145	17.7233	20.4775	13.2273	16.971	11.8016	9.47825	27.6022
465.95	17.7059	27.8821	20.5042	17.7938	20.4108	13.1994	17.0374	11.8118	9.55915	27.6101
466.4	17.6606	27.9517	20.6455	17.8862	20.3864	13.076	17.1229	11.7615	9.62322	27.6742
466.85	17.5981	28.077	20.7562	17.9475	20.3777	12.9383	17.0831	11.7189	9.65391	27.7189
467.3	17.5775	28.1831	20.819	17.9881	20.3793	12.8577	17.0385	11.6224	9.58545	27.726
467.75	17.5869	28.2129	20.7203	17.9908	20.3848	12.7767	16.9868	11.5836	9.49374	27.7402
468.2	17.6243	28.2096	20.5645	18.0262	20.3973	12.8632	16.9143	11.6305	9.45817	27.7568
468.65	17.6591	28.0911	20.3957	18.0971	20.4743	12.9628	16.9289	11.6886	9.45893	27.6919
469.1	17.6514	28.0315	20.2461	18.17	20.5829	13.0522	16.9223	11.7576	9.51803	27.6723
469.55	17.6504	27.9659	20.1535	18.2201	20.7015	13.1348	16.888	11.7788	9.5558	27.5373
470	17.6346	27.8444	20.1242	18.2093	20.7615	13.1544	16.8891	11.7648	9.53974	27.3762
470.45	17.6067	27.8361	20.0908	18.1898	20.6861	13.1505	16.8562	11.7697	9.51382	27.3805
470.9	17.6081	27.698	20.0766	18.1678	20.5765	13.1332	16.867	11.7914	9.50053	27.377
471.35	17.6173	27.6145	20.0233	18.2103	20.4792	13.1004	16.8916	11.8166	9.54299	27.5105
471.8	17.6101	27.6264	19.9346	18.2739	20.4041	13.0409	16.8877	11.8463	9.61509	27.6817
472.25	17.6306	27.4881	19.8144	18.3156	20.4054	13.0274	16.9374	11.8484	9.65305	27.7405
472.7	17.6476	27.5386	19.6942	18.3546	20.4136	13.0491	16.9675	11.8512	9.62676	27.72
473.15	17.6401	27.5529	19.6604	18.2592	20.4134	13.1051	16.9971	11.8461	9.53811	27.6949
473.6	17.6542	27.5591	19.6484	18.1388	20.4279	13.1974	17.0347	11.8583	9.44258	27.6456
474.05	17.6729	27.7276	19.7481	18.0412	20.4161	13.2947	17.0085	11.878	9.40901	27.6605
474.5	17.6861	27.7528	19.8372	17.9837	20.4117	13.3634	16.9486	11.8601	9.43139	27.8437
474.95	17.6967	27.8224	19.8806	17.9752	20.3962	13.3912	16.8995	11.8776	9.47892	27.9347
475.4	17.6924	27.7407	19.8969	18.0213	20.2918	13.3671	16.8591	11.8417	9.52386	27.9545
475.85	17.6512	27.6176	19.8136	18.0505	20.1942	13.2829	16.8641	11.8454	9.51229	27.8701
476.3	17.6085	27.4963	19.7455	18.031	20.1061	13.1778	16.9103	11.8854	9.54739	27.6882
476.75	17.5989	27.2893	19.702	18.0886	20.0489	13.0487	17.0289	11.9207	9.57866	27.5912
477.2	17.5072	27.1917	19.709	18.1231	20.1565	12.9527	17.1545	11.9598	9.62264	27.6222
477.65	17.4263	26.9753	19.7686	18.1532	20.2694	12.8794	17.2518	11.9238	9.67591	27.7433
478.1	17.3692	26.7792	19.8115	18.1717	20.3421	12.859	17.3505	11.8784	9.62857	27.6718
478.55	17.2743	26.5619	19.8651	18.1214	20.3972	12.892	17.2906	11.7913	9.59118	27.5634
479	17.4169	26.3531	19.8894	18.1217	20.359	12.9527	17.194	11.7395	9.55188	27.3438
479.45	17.5613	26.1374	19.9362	18.1571	20.3399	13.0397	17.1059	11.7106	9.54232	27.1033
479.9	17.6659	25.9614	19.9736	18.2591	20.3365	13.0965	16.968	11.7124	9.57426	27.1728
480.35	17.8041	25.9105	19.9714	18.3547	20.3342	13.1806	16.9018	11.7309	9.57875	27.2984
480.8	17.7878	25.8857	19.9495	18.3499	20.3627	13.2152	16.8613	11.7171	9.56823	27.5452
481.25	17.7903	26.0726	19.8739	18.3026	20.3552	13.252	16.8277	11.7283	9.58506	27.7562
481.7	17.8204	26.2225	19.8312	18.2096	20.3984	13.2821	16.8452	11.6736	9.61767	27.8186
482.15	17.8117	26.3223	19.8095	18.1084	20.4363	13.2466	16.8909	11.6662	9.69245	27.8088
482.6	17.8213	26.4109	19.8602	18.0486	20.4366	13.2462	16.9237	11.7086	9.76331	27.7349
483.05	17.8184	26.374	19.9461	18.0282	20.4601	13.2389	16.9354	11.7551	9.72755	27.7158
483.5	17.7731	26.3475	20.0118	18.0172	20.4031	13.2452	16.9531	11.8708	9.65267	27.7064
483.95	17.783	26.3396	20.0746	18.0341	20.325	13.2549	16.8131	11.9388	9.55791	27.7437
484.4	17.7598	26.337	20.0612	18.0635	20.2664	13.2635	16.6712	11.9688	9.47653	27.7339
484.85	17.7428	26.3712	20.0339	18.0497	20.1838	13.2392	16.5501	11.9567	9.48638	27.6026
485.3	17.7881	26.4162	20.0042	18.035	20.1424	13.301	16.3916	11.8136	9.53209	27.5269
485.75	17.7649	26.4234	19.9973	18.0397	20.1292	13.3572	16.501	11.6589	9.57493	27.4583
486.2	17.734	26.4167	20.0325	18.0946	20.1245	13.3793	16.6216	11.5184	9.61308	27.3993
486.65	17.6563	26.3532	20.0524	18.1456	20.1593	13.4274	16.7561	11.4138	9.59759	27.4591
487.1	17.5236	26.3077	20.0895	18.1979	20.2006	13.2619	16.9076	11.4834	9.57187	27.4522
487.55	17.434	26.2979	20.0763	18.2216	20.2309	13.1268	16.8978	11.5698	9.56709	27.3267
488	17.3661	26.2954	20.0473	18.1422	20.2721	12.9801	16.8904	11.658	9.56814	27.2014
488.45	17.3712	26.3483	20.011	18.0834	20.2498	12.8271	16.8386	11.7216	9.58707	27.0846
488.9	17.4303	26.3537	19.986	18.0405	20.2264	12.8251	16.7945	11.6933	9.59463	26.9985
489.35	17.4704	26.3461	20.0042	18.0027	20.2323	12.8275	16.7744	11.6801	9.58105	26.9821
489.8	17.5283	26.2928	20.0234	18.012	20.2118	12.8724	16.7566	11.6478	9.57751	27.0175
490.25	17.5564	26.2072	20.0749	18.0433	20.291	12.9506	16.7544	11.6862	9.59529	27.0674
490.7	17.5753	26.1642	20.0565	18.0175	20.3377	13.0339	16.7123	11.7575	9.61509	27.1363
491.15	17.6384	26.1538	20.009	17.9878	20.3435	13.1017	16.7159	11.8185	9.68566	27.2777
491.6	17.6822	26.2131	19.9519	17.9694	20.3674	13.1822	16.656	11.8968	9.71703	27.4363
492.05	17.7027	26.3009	19.881	17.9369	20.2905	13.2199	16.6355	11.8814	9.72649	27.4619
492.5	17.683	26.3638	19.8461	17.9473	20.2409	13.202	16.6881	11.8287	9.76828	27.4477
492.95	17.606	26.3851	19.7999	17.9572	20.218	13.1997	16.6786	11.7857	9.71751	27.4055
493.4	17.5411	26.3418	19.8589	17.9521	20.1633	13.1648	16.7648	11.7407	9.69083	27.2569
493.85	17.4921	26.3197	19.9318	18.0148	20.2082	13.1834	16.8269	11.743	9.64894	27.2748
494.3	17.4866	26.2723	20.0565	18.057	20.2533	13.2299	16.8362	11.7773	9.55953	27.2824
494.75	17.511	26.2075	20.2521	18.1328	20.3557	13.2706	16.8559	11.734	9.51296	27.2837
495.2	17.5199	26.2467	20.2423	18.2323	20.4488	13.2996	16.8215	11.7162	9.48724	27.4401
495.65	17.5443	26.2219	20.2052	18.1511	20.4438	13.2362	16.657	11.6703	9.429	27.5591
496.1	17.5468	26.3145	20.0794	18.1297	20.4598	13.1584	16.4894	11.6173	9.39324	27.6962
496.55	17.5556	26.4901	19.818	18.0725	20.3396	13.0347	16.3493	11.678	9.335	27.8064
497	17.5611	26.6582	19.6712	18.0318	20.268	12.928	16.2371	11.6664	9.20619	27.7967
497.45	17.5838	26.859	19.5379	18.1633	20.2331	12.8844	16.3528	11.6596	9.21451	27.7381
497.9	17.5959	27.0029	19.4671	18.2387	20.1768	12.8546	16.5011	11.6449	9.24664	27.6845
498.35	17.5835	27.1543	19.5574	18.3579	20.1906	12.9138	16.6255	11.5922	9.30947	27.6142
498.8	17.6035	27.2511	19.662	18.402	20.1952	13.0008	16.781	11.5925	9.45348	27.5838
499.25	17.5592	27.3983	19.7487	18.4426	20.1993	13.0884	16.84	11.642	9.50923	27.5924
499.7	17.5189	27.4986	19.8578	18.504	20.1926	13.1671	16.8772	11.7292	9.5318	27.5982
500.15	17.4816	27.484	19.8865	18.5816	20.1534	13.1869	16.9258	11.81	9.55791	27.6373
500.6	17.4191	27.3936	19.8877	18.7247	20.116	13.1943	16.8779	11.9007	9.58851	27.7271
501.05	17.4051	27.2393	19.9201	18.7686	20.1045	13.0837	16.8227	11.9313	9.64655	27.7244
501.5	17.397	27.1494	19.8686	18.7924	20.0415	12.9988	16.7632	11.8991	9.70412	27.717
501.95	17.4159	27.1393	19.842	18.7457	20.0548	12.9318	16.698	11.835	9.7504	27.6909
502.4	17.4431	27.228	19.8149	18.7016	20.0488	12.8488	16.6878	11.7761	9.71913	27.513
502.85	17.4306	27.3668	19.7907	18.6954	20.0532	12.9839	16.6756	11.7356	9.63173	27.4277
503.3	17.4231	27.4692	19.8255	18.7368	20.1538	13.0696	16.7158	11.7156	9.56747	27.3419
503.75	17.4033	27.5292	19.7538	18.7333	20.1907	13.1383	16.7977	11.7437	9.5142	27.2136
504.2	17.4142	27.5674	19.6808	18.6708	20.2318	13.1945	16.9111	11.7717	9.50732	27.2331
504.65	17.4603	27.518	19.5864	18.5787	20.2054	13.1409	17.0409	11.832	9.5426	27.1929
505.1	17.504	27.4513	19.4969	18.4321	20.1691	13.141	17.0965	11.9142	9.55972	27.161
505.55	17.5362	27.4253	19.5779	18.3974	20.1404	13.1679	17.1176	12.0098	9.56116	27.2172
506	17.5251	27.3449	19.6967	18.3471	20.1222	13.3003	17.0726	12.0002	9.55876	27.1777
506.45	17.489	27.2788	19.7964	18.3803	20.1557	13.4073	16.9847	11.9611	9.55159	27.2053
506.9	17.4763	27.2703	19.9176	18.4209	20.1577	13.4723	16.9329	11.8933	9.53954	27.2365
507.35	17.5028	27.1837	19.9793	18.3788	20.1842	13.5024	16.784	11.7654	9.5406	27.2092
507.8	17.5503	27.1345	20.044	18.3911	20.145	13.3279	16.6882	11.7174	9.55437	27.1953
508.25	17.65	27.0658	20.153	18.3476	20.0942	13.1898	16.6343	11.6595	9.59357	27.0989
508.7	17.807	26.9504	20.1718	18.3298	20.0424	13.0918	16.568	11.6377	9.65717	27.0002
509.15	17.9188	26.9477	20.2192	18.3241	19.9687	13.036	16.6702	11.622	9.71674	26.9176
509.6	18.0128	26.9796	20.2417	18.3242	20.0134	13.1233	16.7732	11.6209	9.75624	26.8759
510.05	18.0511	27.1398	20.2499	18.3171	20.0388	13.1927	16.8657	11.6329	9.73568	26.8831
510.5	17.8508	27.2885	20.3142	18.1904	20.074	13.1475	16.9763	11.6195	9.66376	26.8839
510.95	17.6533	27.3559	20.3059	18.1041	20.133	13.0825	17.0112	11.6495	9.59988	26.8928
511.4	17.4567	27.3591	20.3097	18.0118	20.1152	12.9988	16.9855	11.6727	9.56316	26.8949
511.85	17.2873	27.2713	20.338	17.8916	20.1308	12.9403	16.9669	11.7083	9.55446	26.8804
512.3	17.3113	27.1605	20.3871	17.965	20.1418	13.0752	16.9446	11.7416	9.60572	26.8452
512.75	17.3175	27.1083	20.4089	18.0152	20.1482	13.2059	16.9295	11.789	9.62771	26.8199
513.2	17.3339	27.1171	20.3831	18.0639	20.1622	13.3434	16.9523	11.8207	9.61213	26.7752
513.65	17.3354	27.1649	20.4261	18.1833	20.1434	13.4429	16.9676	11.8445	9.62724	26.7219
514.1	17.3209	27.3081	20.4194	18.2373	20.1063	13.4263	16.9465	11.8582	9.64923	26.7135
514.55	17.3799	27.3799	20.5354	18.3062	20.1703	13.386	16.9059	11.7905	9.68212	26.7027
515	17.4467	27.4379	20.6433	18.377	20.2467	13.3108	16.8489	11.7392	9.70173	26.6812
515.45	17.5403	27.4352	20.5155	18.3757	20.3485	13.2477	16.7659	11.6628	9.66329	26.7114
515.9	17.5808	27.2974	20.4272	18.3315	20.4714	13.1857	16.7058	11.6107	9.5471	26.7181
516.35	17.5448	27.1356	20.271	18.2617	20.3416	13.1525	16.6588	11.6073	9.45587	26.6961
516.8	17.4968	26.8792	20.1661	18.159	20.232	13.1413	16.6369	11.6293	9.43072	26.7115
517.25	17.4137	26.5984	20.2155	18.1196	20.1051	13.1429	16.6596	11.6697	9.43808	26.7614
517.7	17.4011	26.3105	20.1973	18.0916	19.9842	13.1532	16.7101	11.7195	9.52052	26.8764
518.15	17.4329	26.0522	20.0976	18.1897	20.0232	13.1736	16.7397	11.8069	9.56661	27.0831
518.6	17.442	25.9155	20.0399	18.299	20.0165	13.1806	16.783	11.8156	9.55284	27.2414
519.05	17.4986	25.8367	19.9546	18.3802	20.0159	13.1931	16.7929	11.8506	9.57627	27.2753
519.5	17.5017	25.8546	19.9611	18.4882	20.021	13.2145	16.7339	11.8572	9.5798	27.2326
519.95	17.4751	25.9165	20.0534	18.3624	20.0055	13.2043	16.7219	11.8178	9.55963	27.0906
520.4	17.4728	25.9135	20.0646	18.2833	20.0099	13.2003	16.6802	11.824	9.56613	27.126
520.85	17.4106	25.9072	20.0576	18.2242	19.9854	13.2016	16.6551	11.7884	9.49862	27.2751
521.3	17.3878	25.8976	20.0045	18.0587	19.9384	13.2027	16.7105	11.7445	9.43072	27.4574
521.75	17.4063	25.8693	19.9484	18.0385	19.9287	13.2765	16.716	11.7079	9.47232	27.7259
522.2	17.4556	25.8969	19.8893	17.9903	19.9276	13.3636	16.7334	11.67	9.53142	27.7671
522.65	17.5448	25.8909	19.8707	17.9384	20.0145	13.3993	16.7453	11.6466	9.61174	27.7317
523.1	17.5993	25.8674	19.8392	18.0361	20.1096	13.4215	16.727	11.6803	9.67132	27.7034
523.55	17.6298	25.8677	19.7953	18.1165	20.1751	13.3139	16.837	11.7306	9.65449	27.6412
524	17.5866	25.8254	19.7921	18.1938	20.2122	13.1993	16.9261	11.8178	9.60362	27.7066
524.45	17.5315	25.8695	19.7857	18.2309	20.1683	13.1162	17.0344	11.9032	9.60084	27.7612
524.9	17.461	25.9045	19.8263	18.2401	20.1025	13.0461	17.1166	11.9217	9.64923	27.7394
525.35	17.3783	25.888	19.8713	18.2507	20.0217	13.0561	17.0077	11.8949	9.69092	27.6071
525.8	17.3829	25.8805	19.9415	18.2468	19.9746	13.0655	16.9153	11.8292	9.75298	27.4217
526.25	17.3817	25.825	20.0002	18.2718	19.9562	13.0918	16.7885	11.9077	9.76293	27.2985
526.7	17.4466	25.8119	20.0377	18.2651	19.9785	13.0772	16.6659	12.0275	9.70374	27.2397
527.15	17.5549	25.8453	20.0598	18.2509	19.983	13.0671	16.6402	12.1752	9.68614	27.2818
527.6	17.612	25.878	19.9859	18.2609	20.0741	13.0615	16.6455	12.2863	9.67132	27.3332
528.05	17.678	25.9256	19.8976	18.2801	20.1585	13.0412	16.6636	12.1306	9.67926	27.3419
528.5	17.6847	25.9431	19.7754	18.3235	20.2317	13.0823	16.7451	11.9468	9.71043	27.3442
528.95	17.5601	25.9418	19.7618	18.3883	20.3538	13.1219	16.8141	11.8072	9.70077	27.3105
529.4	17.4444	25.9596	19.8207	18.4428	20.307	13.1448	16.8369	11.7335	9.68289	27.3101
529.85	17.3051	25.9404	19.8942	18.4635	20.2485	13.1539	16.8871	11.7777	9.63814	27.3247
530.3	17.2144	25.9392	20.0342	18.4097	20.1682	13.1795	16.884	11.8418	9.6062	27.3515
530.75	17.3408	25.9353	19.9994	18.3262	20.0472	13.1985	16.8975	11.8546	9.59558	27.4544
531.2	17.4557	25.914	19.9469	18.2198	19.9893	13.2128	16.9146	11.8575	9.58325	27.5207
531.65	17.6193	25.9177	19.9146	18.1782	19.9751	13.2486	16.8781	11.8916	9.61528	27.6133
532.1	17.6943	25.8861	19.8314	18.1939	19.9921	13.2316	16.8462	11.9315	9.63565	27.6823
532.55	17.6486	25.9045	19.8157	18.2109	20.0437	13.2168	16.7875	11.9526	9.65707	27.7147
533	17.587	25.9433	19.8132	18.2787	20.0883	13.2456	16.7697	11.9467	9.6871	27.7548
533.45	17.4989	25.9829	19.7942	18.2981	20.1066	13.2631	16.809	11.9167	9.6871	27.7598
533.9	17.5077	26.0606	19.7823	18.2938	20.0468	13.2842	16.8558	11.8577	9.68356	27.8141
534.35	17.5288	26.0803	19.8388	18.3014	19.9547	13.3022	16.9177	11.8209	9.69561	27.8324
534.8	17.6037	26.08	19.8845	18.2606	19.8869	13.2709	16.9464	11.8083	9.66577	27.8317
535.25	17.6701	26.0739	19.9277	18.2255	19.8036	13.2524	17.0387	11.8008	9.66549	27.8483
535.7	17.7275	26.074	19.9385	18.1954	19.8664	13.2327	17.1068	11.7838	9.7112	27.7047
536.15	17.6929	26.086	19.8767	18.1556	19.9578	13.2401	17.1706	11.7883	9.69475	27.555
536.6	17.6332	26.1166	19.9029	18.1584	20.063	13.3068	17.2174	11.7512	9.71961	27.4654
537.05	17.5991	26.1546	19.9118	18.1578	20.1799	13.3672	17.0799	11.7132	9.71282	27.3761
537.5	17.5208	26.1362	19.9993	18.2046	20.1751	13.4442	16.9927	11.755	9.65181	27.4445
537.95	17.5633	26.116	20.1149	18.2857	20.1665	13.435	16.9089	11.7596	9.6651	27.6035
538.4	17.6348	26.0861	20.0499	18.3299	20.1437	13.3796	16.8385	11.8278	9.70565	27.6889
538.85	17.6628	26.0554	20.0081	18.4069	20.1215	13.3222	16.8726	11.8879	9.74859	27.7722
539.3	17.691	26.0598	19.8803	18.4204	20.1464	13.2603	16.8839	11.9092	9.75241	27.8366
539.75	17.687	26.0653	19.705	18.3792	20.143	13.2763	16.8959	11.9506	9.71339	27.8087
540.2	17.6421	26.047	19.6418	18.3646	20.0993	13.2702	16.9371	11.9128	9.62044	27.8205
540.65	17.623	26.0168	19.5916	18.2919	20.0403	13.2953	16.9398	11.8825	9.54471	27.7986
541.1	17.6165	25.9388	19.6192	18.2601	19.9547	13.3057	16.8983	11.826	9.60601	27.695
541.55	17.5765	25.869	19.7267	18.2637	19.9061	13.3093	16.8432	11.7885	9.64923	27.5941
542	17.5141	25.8474	19.807	18.2514	19.9118	13.3686	16.7692	11.8275	9.68241	27.483
542.45	17.4644	25.8283	19.8529	18.2982	19.9507	13.3849	16.7717	11.8864	9.67792	27.4402
542.9	17.4089	25.9001	19.8633	18.2995	20.0294	13.4292	16.8256	11.9326	9.59491	27.5021
543.35	17.4189	25.949	19.8372	18.2624	20.0777	13.4372	16.9165	11.9467	9.55982	27.5867
543.8	17.4651	25.9538	19.8286	18.2145	20.0706	13.4317	16.9875	11.9298	9.51631	27.6966
544.25	17.524	25.9773	19.8671	18.1268	20.0514	13.4039	16.9672	11.8819	9.5056	27.7607
544.7	17.6259	25.9614	19.9133	18.0892	20.0005	13.3749	16.9296	11.8694	9.48609	27.7491
545.15	17.674	26.0205	19.9678	18.1151	19.9492	13.3843	16.8582	11.8372	9.4421	27.7478
545.6	17.7116	26.0848	20.0187	18.1842	19.9582	13.3477	16.8139	11.806	9.5208	27.7262
546.05	17.6873	26.1656	20.0055	18.2746	19.9553	13.3541	16.8287	11.7761	9.65162	27.6899
546.5	17.6063	26.2423	19.9982	18.3897	19.9723	13.322	16.8575	11.75	9.82193	27.7177
546.95	17.5628	26.2054	19.9481	18.4611	20.008	13.2826	16.9063	11.7821	9.96298	27.7839
547.4	17.563	26.1779	19.9067	18.472	19.986	13.2598	16.9519	11.8097	9.98947	27.759
547.85	17.5899	26.0772	19.9104	18.4526	19.9872	13.254	16.9961	11.8423	9.9298	27.7707
548.3	17.6568	25.9435	19.8902	18.3241	19.9877	13.2831	17.0266	11.8599	9.81285	27.7655
548.75	17.6773	25.8715	19.9075	18.2163	20.0214	13.3211	17.0219	11.8468	9.77603	27.6885
549.2	17.6307	25.7719	19.8821	18.1595	20.0712	13.4185	17.0062	11.8243	9.77909	27.693
549.65	17.6224	25.6993	19.8458	18.1465	20.1058	13.488	16.9567	11.7439	9.8007	27.6869
550.1	17.5714	25.6995	19.9088	18.2215	20.1078	13.5658	16.8787	11.6744	9.83331	27.6268
550.55	17.5571	25.6901	19.9798	18.2768	20.0649	13.5894	16.8398	11.6379	9.81342	27.5484
551	17.5808	25.7189	20.0991	18.287	20.0787	13.5799	16.817	11.6016	9.79802	27.5293
551.45	17.5692	25.7175	20.2085	18.2809	20.0745	13.5468	16.8277	11.6546	9.82317	27.498
551.9	17.6085	25.6646	20.1601	18.2466	20.0926	13.5426	16.8867	11.6998	9.90494	27.5748
552.35	17.6258	25.6346	20.1097	18.2208	20.1165	13.6115	16.9146	11.7009	9.97933	27.732
552.8	17.6425	25.6066	20.0331	18.2139	20.0572	13.6559	16.9324	11.7262	10.0249	27.8271
553.25	17.6385	25.6763	19.9832	18.1967	20.0064	13.7171	16.9386	11.7476	10.0271	27.9503
553.7	17.6175	25.7405	19.9836	18.2057	19.9861	13.6392	16.9333	11.7701	10.0042	27.9443
554.15	17.6155	25.7796	19.9752	18.2565	20.0252	13.5038	17.0107	11.8134	10.0256	27.9274
554.6	17.59	25.8309	19.9654	18.339	20.1303	13.3844	17.0607	11.94	10.0806	27.9339
555.05	17.7288	25.8288	19.9316	18.3989	20.2466	13.3049	17.1003	12.0351	10.1232	27.8379
555.5	17.8291	25.8355	19.9312	18.437	20.2958	13.3306	17.1337	12.1235	10.0929	27.8005
555.95	17.9045	25.8468	19.9368	18.4603	20.2042	13.3972	17.0476	12.2217	10.0124	27.6822
556.4	18.0037	25.8863	19.9907	18.4563	20.1106	13.4576	16.9841	12.1383	9.92817	27.5362
556.85	17.8115	25.9534	20.0459	18.5195	20.0162	13.4398	16.9309	12.0873	9.90407	27.5455
557.3	17.6596	26.0373	20.0964	18.6163	19.9686	13.403	16.8836	12.0495	9.94787	27.5654
557.75	17.552	26.1237	20.0669	18.678	20.0217	13.3229	16.8503	11.9972	9.97321	27.6624
558.2	17.4389	26.0904	19.9792	18.7804	20.0177	13.2589	16.8182	12.0304	9.97637	27.7888
558.65	17.5055	26.0276	19.9004	18.8572	19.9965	13.2768	16.8513	12.0571	9.89901	27.8352
559.1	17.5795	25.9689	19.7911	18.9352	19.9832	13.3355	16.8786	12.039	9.82777	27.8536
559.55	17.6207	25.9284	19.8035	18.9702	19.9503	13.4317	16.9674	12.0129	9.84727	27.8481
560	17.6586	25.9662	19.8534	19.0011	19.9636	13.5455	17.0787	11.9898	9.8599	27.803
560.45	17.6691	26.0055	19.9162	19.0482	20.0044	13.6344	17.0474	11.9175	9.94529	27.7023
560.9	17.6369	26.0158	19.9767	18.9718	20.0159	13.6843	16.9798	11.924	10.01	27.6744
561.35	17.5906	25.9941	20.0042	18.9769	20.0437	13.7541	16.8863	11.9296	9.99052	27.6085
561.8	17.5409	26.0216	20.0126	18.8617	20.0597	13.7767	16.7463	11.9325	9.98947	27.5574
562.25	17.5128	26.0409	19.9854	18.6584	20.0751	13.7651	16.6919	11.9626	9.98125	27.5628
562.7	17.5321	26.0633	20.0214	18.5905	20.0999	13.7155	16.721	11.9373	9.98115	27.5037
563.15	17.5748	26.1288	20.028	18.5189	20.1084	13.6054	16.7577	11.9097	10.0208	27.5544
563.6	17.6318	26.0796	20.0213	18.5903	20.1268	13.496	16.828	11.8651	10.0276	27.6566
564.05	17.6719	26.0439	20.0123	18.709	20.1384	13.4414	16.8702	11.8617	9.98756	27.82
564.5	17.7098	26.0052	19.9586	18.7861	20.2101	13.4333	16.842	11.8534	9.92091	28.0081
564.95	17.7814	25.9262	19.8352	18.8436	20.2669	13.4111	16.804	11.8816	9.84536	28.1347
565.4	17.8384	25.9129	19.7432	18.8547	20.3164	13.4265	16.7762	11.9294	9.84144	28.1377
565.85	17.8867	25.9131	19.6855	18.8853	20.3638	13.3896	16.7253	11.8966	9.87309	28.0505
566.3	17.8906	25.9674	19.6513	18.8898	20.3061	13.3718	16.7244	11.9007	9.91851	27.9514
566.75	17.8274	25.8991	19.7795	18.8872	20.2997	13.4065	16.7458	11.8854	9.97082	27.793
567.2	17.7646	25.8055	19.8946	18.8348	20.2929	13.4252	16.778	11.8759	9.98306	27.8213
567.65	17.7255	25.6853	19.9944	18.7847	20.2746	13.4808	16.9106	11.9356	10.0158	27.9406
568.1	17.7397	25.5112	20.1129	18.7481	20.3206	13.4945	17.0113	12.0007	10.0023	28.061
568.55	17.7762	25.6303	20.1593	18.7053	20.3235	13.524	17.0838	12.0775	9.95839	28.2543
569	17.819	25.7578	20.1597	18.6827	20.3118	13.554	17.1054	12.1673	9.88026	28.2568
569.45	17.8335	25.8885	20.1682	18.6587	20.3067	13.5639	17.0684	12.2522	9.7614	28.1725
569.9	17.8002	26.046	20.0852	18.6719	20.2585	13.6023	17.0445	12.3013	9.7766	28.0389
570.35	17.7795	25.9919	19.9519	18.652	20.1991	13.6243	17.0754	12.2929	9.85234	27.8465
570.8	17.7723	25.9505	19.8793	18.6516	20.1273	13.6501	17.1538	12.2334	9.97685	27.746
571.25	17.8146	25.9261	19.8197	18.6212	20.0038	13.6647	17.2395	12.1464	10.0881	27.6784
571.7	17.8853	25.9193	19.8177	18.543	19.9064	13.6853	17.3012	12.0592	10.1157	27.6415
572.15	17.9538	26.0865	19.9017	18.5079	19.8525	13.6809	17.2535	12.0366	10.1084	27.6544
572.6	17.9805	26.2575	19.9882	18.4752	19.8583	13.6339	17.1528	12.0616	10.0794	27.691
573.05	17.9272	26.4314	20.0543	18.5352	19.984	13.6318	17.034	12.1078	9.97752	27.7322
573.5	17.8637	26.5534	20.156	18.6347	20.1215	13.5987	16.9177	12.1591	9.87357	27.8522
573.95	17.8046	26.4581	20.2087	18.7547	20.2412	13.5655	16.9064	12.1544	9.73634	27.9522
574.4	17.7891	26.3239	20.2302	18.8589	20.3	13.6339	16.9323	12.1353	9.56431	27.9473
574.85	17.8516	26.1844	20.2368	18.8297	20.2845	13.6237	16.9584	12.0645	9.59195	27.8587
575.3	17.9018	26.0426	20.1949	18.7484	20.2542	13.6358	17.0322	12.0414	9.65621	27.5964
575.75	17.9717	25.9855	20.1444	18.6412	20.2148	13.6728	17.0484	12.0424	9.7767	27.3208
576.2	18.0033	25.9801	20.0967	18.5043	20.2238	13.6165	17.055	12.0648	9.98058	27.1302
576.65	17.9879	25.9424	20.1057	18.4246	20.2319	13.6387	17.0837	12.1375	10.0981	27.0263
577.1	17.9888	25.9592	20.1344	18.4103	20.249	13.6484	17.0767	12.1509	10.1482	27.0479
577.55	17.9456	26.009	20.1652	18.3877	20.3256	13.6575	17.0039	12.1979	10.1646	27.0658
578	17.9357	26.0267	20.2134	18.5033	20.3722	13.6985	16.9051	12.1857	10.1205	27.0538
578.45	17.9346	26.0454	20.2179	18.6223	20.4546	13.7109	16.7833	12.1834	10.0626	27.0589
578.9	17.9303	25.9986	20.1694	18.6893	20.5328	13.7184	16.6308	12.1917	10.0555	27.088
579.35	17.9094	25.9001	20.1386	18.7379	20.483	13.719	16.6494	12.1954	10.0685	27.1668
579.8	17.8615	25.8264	20.1093	18.6553	20.4349	13.7253	16.7022	12.22	10.0921	27.2812
580.25	17.8086	25.8014	20.0473	18.5608	20.3425	13.7257	16.7638	12.2059	10.1183	27.3474
580.7	17.761	25.8434	20.0486	18.4742	20.2385	13.7569	16.8841	12.1927	10.1323	27.3348
581.15	17.796	25.9312	20.0564	18.4374	20.2188	13.7461	16.9151	12.1057	10.134	27.262
581.6	17.8781	26.0159	20.0426	18.4425	20.179	13.7272	16.9413	12.0448	10.1583	27.1634
582.05	17.9955	26.0784	20.0667	18.486	20.1529	13.7376	17.01	12.0002	10.1756	27.0654
582.5	18.1113	26.095	20.0982	18.5227	20.1481	13.7434	17.0784	11.9907	10.2153	27.0293
582.95	18.1614	26.116	20.1133	18.5648	20.1398	13.8083	17.1329	12.0735	10.2792	26.9619
583.4	18.1742	26.0956	20.1272	18.5267	20.1906	13.8549	17.1972	12.1414	10.327	26.8715
583.85	18.1563	26.0725	20.1405	18.4494	20.2369	13.8862	17.1863	12.1824	10.3961	26.8084
584.3	18.1545	26.1053	20.1101	18.4305	20.2294	13.8883	17.1315	12.1917	10.4223	26.7215
584.75	18.1615	26.103	20.0637	18.3771	20.2302	13.8826	17.0972	12.1813	10.3837	26.8138
585.2	18.1595	26.1164	20.0548	18.4609	20.2099	13.8669	17.0419	12.1564	10.3444	26.9532
585.65	18.1554	26.1153	20.1398	18.5529	20.2235	13.7142	17.0275	12.2091	10.2822	27.0832
586.1	18.1118	26.0493	20.2772	18.5659	20.319	13.5544	17.0188	12.233	10.2545	27.2096
586.55	18.0727	25.9848	20.4744	18.6318	20.3698	13.3874	17.0213	12.2255	10.289	27.2147
587	18.0769	25.9349	20.6268	18.6448	20.3971	13.281	17.0342	12.2581	10.3198	27.23
587.45	18.0705	25.8854	20.5753	18.679	20.3895	13.4394	17.0428	12.2337	10.3342	27.2669
587.9	17.9706	25.8596	20.4483	18.7736	20.332	13.6426	17.0605	12.2563	10.2936	27.3072
588.35	17.8779	25.8825	20.2688	18.7873	20.2995	13.8385	17.0644	12.2819	10.2203	27.3651
588.8	17.7395	25.925	20.1041	18.8238	20.2585	14.0187	17.0548	12.2626	10.161	27.402
589.25	17.6255	25.9852	20.0784	18.8519	20.2217	14.0301	17.0458	12.2262	10.137	27.4163
589.7	17.7202	26.0352	20.0781	18.8857	20.2117	14.0085	17.0471	12.1833	10.1762	27.3769
590.15	17.8282	26.0247	20.0926	18.9545	20.2505	13.9843	17.0287	12.1356	10.2213	27.3102
590.6	17.9526	25.994	20.1205	18.9479	20.3547	13.9172	17.0318	12.1145	10.2644	27.2373
591.05	18.0565	25.9631	20.1287	18.9276	20.4415	13.8949	17.0256	12.1207	10.29	27.1737
591.5	18.0906	25.9841	20.1646	18.8415	20.4956	13.8638	17.0241	12.1185	10.3037	27.0862
591.95	18.1152	26.0462	20.2041	18.7486	20.4954	13.8337	17.0585	12.1378	10.3298	27.016
592.4	18.1087	26.1127	20.2208	18.7089	20.4153	13.8276	17.1087	12.148	10.3054	26.9172
592.85	18.1292	26.183	20.211	18.6622	20.423	13.797	17.1572	12.1518	10.3827	26.8206
593.3	18.1534	26.1724	20.2162	18.6599	20.4511	13.7807	17.1833	12.1752	10.447	26.93
593.75	18.1705	26.15	20.3114	18.671	20.4565	13.7862	17.2038	12.201	10.5059	27.0594
594.2	18.2481	26.1294	20.4423	18.6881	20.5005	13.7862	17.1876	12.2332	10.6495	27.2579
594.65	18.331	26.1267	20.6132	18.7432	20.4234	13.7883	17.1875	12.2684	10.6036	27.4308
595.1	18.4142	26.1446	20.7411	18.7801	20.3531	13.7961	17.2048	12.2696	10.5385	27.4697
595.55	18.4652	26.1613	20.6656	18.8424	20.349	13.7915	17.1962	12.2568	10.463	27.4726
596	18.4869	26.1544	20.5678	18.8473	20.3414	13.8187	17.1773	12.2468	10.3265	27.418
596.45	18.4467	26.1005	20.4267	18.8142	20.3754	13.873	17.1603	12.2388	10.2632	27.3777
596.9	18.3419	26.0346	20.2673	18.816	20.3731	13.9238	17.0878	12.2679	10.2491	27.3492
597.35	18.2984	25.9633	20.2285	18.7644	20.3039	13.9156	17.0412	12.2907	10.2678	27.3462
597.8	18.2666	25.9143	20.1732	18.7772	20.2368	13.8753	17.0373	12.3217	10.254	27.3535
598.25	18.2852	25.9068	20.1252	18.7989	20.201	13.8106	17.0243	12.3421	10.2719	27.3388
598.7	18.3519	25.9719	20.1409	18.7994	20.2252	13.7735	17.0979	12.306	10.2587	27.2993
599.15	18.3837	26.0262	20.1206	18.8016	20.2762	13.8164	17.1476	12.2839	10.216	27.2602
599.6	18.3954	26.0972	20.1076	18.7868	20.3333	13.8601	17.1767	12.2261	10.2969	27.2378
600.05	18.379	26.1471	20.0661	18.7658	20.388	13.9369	17.1898	12.1992	10.3551	27.3109
600.5	18.3634	26.1755	20.0094	18.7207	20.3957	13.9716	17.1717	12.1958	10.4147	27.434
600.95	18.3588	26.2264	19.996	18.7058	20.4518	13.9977	17.2228	12.2138	10.4723	27.5485
601.4	18.4144	26.2269	20.0246	18.6703	20.5022	14.0215	17.2569	12.2666	10.4206	27.6565
601.85	18.5218	26.2773	20.1404	18.67	20.5253	13.9885	17.3207	12.2931	10.4054	27.6479
602.3	18.6067	26.28	20.2029	18.7245	20.5551	13.9426	17.3756	12.3406	10.4076	27.6947
602.75	18.6689	26.2803	20.2438	18.7952	20.5275	13.8705	17.3272	12.3528	10.3749	27.7228
603.2	18.6239	26.302	20.257	18.9084	20.4841	13.8264	17.3133	12.3285	10.3804	27.7309
603.65	18.5278	26.2081	20.2129	18.9991	20.4524	13.7771	17.3196	12.2996	10.3321	27.7987
604.1	18.4433	26.1781	20.1277	19.0441	20.4264	13.7796	17.3332	12.2811	10.2253	27.6805
604.55	18.3813	26.1575	20.0494	18.9798	20.3943	13.7731	17.3824	12.2376	10.2036	27.5931
605	18.41	26.1329	19.9507	18.8839	20.3725	13.7538	17.3945	12.2713	10.191	27.5366
605.45	18.4549	26.1645	19.8497	18.7481	20.3737	13.8112	17.3301	12.3232	10.2123	27.4628
605.9	18.4857	26.1478	19.9342	18.6259	20.3188	13.8292	17.2766	12.3251	10.2792	27.4658
606.35	18.5152	26.1158	20.0075	18.6899	20.3017	13.9013	17.2502	12.3934	10.2843	27.4301
606.8	18.4933	26.1103	20.0814	18.7488	20.293	13.9543	17.2551	12.3622	10.2901	27.3854
607.25	18.4573	26.2302	20.2284	18.869	20.2571	14.0056	17.3048	12.3275	10.1981	27.365
607.7	18.4114	26.3587	20.272	19.0315	20.319	14.0696	17.3387	12.3497	10.1102	27.401
608.15	18.3617	26.5023	20.3288	19.0569	20.3578	13.9991	17.327	12.3121	10.0633	27.499
608.6	18.3165	26.6451	20.421	19.0733	20.3865	13.9478	17.2463	12.3471	9.99483	27.5961
609.05	18.2896	26.5835	20.4029	19.0801	20.4317	13.8385	17.1653	12.3693	10.0879	27.69
609.5	18.314	26.5156	20.3813	19.029	20.4419	13.7646	17.0761	12.3728	10.1811	27.738
609.95	18.334	26.3977	20.335	19.0104	20.4382	13.8843	17.0088	12.4295	10.2435	27.7506
610.4	18.3757	26.2628	20.25	19.0239	20.4529	14.0007	17.0255	12.5086	10.3113	27.7497
610.85	18.4334	26.2222	20.2024	19.025	20.4475	14.1169	17.0572	12.565	10.3232	27.7099
611.3	18.4522	26.2098	20.1784	19.0173	20.4542	14.1764	17.0871	12.6073	10.303	27.6915
611.75	18.4889	26.2417	20.2997	19.0484	20.5044	14.0944	17.1492	12.5984	10.2887	27.6805
612.2	18.5091	26.2473	20.4434	19.0586	20.5786	13.9975	17.2117	12.4984	10.3207	27.6848
612.65	18.5271	26.265	20.6356	19.0761	20.6336	13.9325	17.2429	12.4581	10.3775	27.6997
613.1	18.5668	26.2836	20.7693	19.1269	20.6686	13.8778	17.2932	12.4239	10.4864	27.6894
613.55	18.5724	26.2897	20.656	19.118	20.6792	13.9137	17.3042	12.4479	10.626	27.65
614	18.5841	26.3408	20.5348	19.1328	20.5759	13.9585	17.274	12.4883	10.6885	27.6026
614.45	18.5725	26.3701	20.3865	19.1149	20.5544	14.0125	17.2618	12.4943	10.6696	27.5638
614.9	18.5373	26.3315	20.2587	19.0733	20.5432	14.0403	17.2392	12.4963	10.6342	27.553
615.35	18.5403	26.3122	20.2446	19.0447	20.5368	14.0059	17.2254	12.4588	10.5705	27.5961
615.8	18.5676	26.2947	20.2461	18.9595	20.6069	13.9712	17.2738	12.438	10.5583	27.6311
616.25	18.6232	26.2859	20.2176	18.8931	20.5975	13.9104	17.3404	12.4261	10.5965	27.6735
616.7	18.6799	26.3369	20.2505	18.8427	20.5557	13.9613	17.4143	12.4457	10.612	27.7065
617.15	18.7083	26.3483	20.2866	18.8264	20.4751	14.0133	17.5007	12.4597	10.718	27.6911
617.6	18.6909	26.3346	20.2949	18.8736	20.4065	14.0923	17.4941	12.5142	10.795	27.7117
618.05	18.6332	26.3128	20.3038	18.9431	20.3512	14.1449	17.4346	12.55	10.8929	27.7137
618.5	18.5792	26.276	20.2602	19.0096	20.3374	14.1338	17.3566	12.5276	11.0076	27.7125
618.95	18.5369	26.2799	20.2359	19.0618	20.3718	14.129	17.3091	12.5116	10.9478	27.719
619.4	18.5198	26.303	20.2416	19.1119	20.4085	14.1271	17.3254	12.4632	10.8907	27.6319
619.85	18.4913	26.3313	20.2912	19.1191	20.4614	14.1897	17.4075	12.415	10.7743	27.5666
620.3	18.468	26.3546	20.3717	19.1205	20.5355	14.21	17.5974	12.4151	10.6081	27.5083
620.75	18.4589	26.3534	20.4427	19.0982	20.5996	14.278	17.7011	12.4336	10.5238	27.4467
621.2	18.4478	26.324	20.4967	19.0826	20.6542	14.2773	17.7615	12.4477	10.4578	27.4367
621.65	18.4849	26.2705	20.5449	19.0747	20.7083	14.2379	17.7613	12.4998	10.4491	27.4041
622.1	18.5496	26.2229	20.5677	19.1307	20.673	14.2368	17.5852	12.5197	10.5009	27.3649
622.55	18.6217	26.1891	20.5569	19.2744	20.6643	14.19	17.4748	12.5165	10.5425	27.3593
623	18.6884	26.1507	20.5451	19.3829	20.6294	14.1932	17.3924	12.5388	10.5761	27.4262
623.45	18.7541	26.1424	20.501	19.5438	20.5985	14.1773	17.3012	12.5208	10.5737	27.5155
623.9	18.7789	26.1742	20.4301	19.6254	20.6256	14.1535	17.2899	12.519	10.5733	27.6204
624.35	18.7387	26.2063	20.4038	19.602	20.6143	14.118	17.279	12.5335	10.5962	27.7133
624.8	18.6894	26.2823	20.3467	19.5734	20.6495	14.0926	17.2606	12.6152	10.6216	27.7752
625.25	18.6143	26.3606	20.3053	19.5531	20.6643	14.1149	17.3235	12.7168	10.6389	27.8391
625.7	18.5542	26.3853	20.3192	19.5512	20.6893	14.1503	17.3695	12.8226	10.6476	27.8822
626.15	18.5642	26.4027	20.3064	19.5668	20.7372	14.1904	17.3855	12.925	10.6473	27.8874
626.6	18.6102	26.4539	20.3593	19.5759	20.7325	14.2152	17.3961	12.8541	10.6861	27.869
627.05	18.6732	26.5073	20.4253	19.584	20.7411	14.2305	17.3624	12.7772	10.7531	27.8571
627.5	18.7425	26.5874	20.4416	19.6102	20.6275	14.2178	17.3157	12.7351	10.7902	27.8641
627.95	18.783	26.6616	20.4781	19.6848	20.506	14.2399	17.2873	12.699	10.8154	27.8545
628.4	18.8188	26.6199	20.5026	19.7822	20.4125	14.2194	17.2802	12.7462	10.7579	27.8536
628.85	18.85	26.5762	20.5152	19.7884	20.3316	14.1713	17.2699	12.8219	10.6945	27.8313
629.3	18.856	26.5068	20.5525	19.768	20.4112	14.1755	17.3571	12.8119	10.6882	27.7783
629.75	18.8528	26.4654	20.6511	19.7235	20.4666	14.1883	17.4247	12.7823	10.6889	27.7449
630.2	18.8	26.4763	20.7221	19.7188	20.5212	14.259	17.4822	12.7413	10.7157	27.6824
630.65	18.7355	26.4606	20.7949	19.7855	20.5678	14.337	17.5514	12.6663	10.7259	27.6073
631.1	18.7045	26.4564	20.899	19.9014	20.585	14.3466	17.5332	12.6509	10.6941	27.547
631.55	18.7058	26.426	20.8599	20.0095	20.5943	14.2861	17.5421	12.6737	10.6636	27.5429
632	18.7397	26.3925	20.8238	20.056	20.6202	14.2145	17.5449	12.725	10.6856	27.5285
632.45	18.7875	26.3725	20.7574	20.1422	20.6109	14.198	17.5231	12.7757	10.7167	27.5282
632.9	18.7848	26.3682	20.6208	20.1541	20.5759	14.2318	17.5548	12.8102	10.7271	27.5349
633.35	18.7348	26.3585	20.5376	20.1566	20.5836	14.3291	17.5538	12.8084	10.7432	27.5705
633.8	18.7087	26.3725	20.4641	20.1337	20.5914	14.4328	17.5668	12.7976	10.7035	27.6817
634.25	18.6949	26.4258	20.4547	19.8863	20.6589	14.4396	17.6073	12.8027	10.6935	27.844
634.7	18.7535	26.4716	20.4859	19.6741	20.7599	14.4146	17.6032	12.8095	10.7355	27.9798
635.15	18.8402	26.5489	20.5547	19.4421	20.8185	14.3635	17.5869	12.8246	10.7969	28.0659
635.6	18.8706	26.6228	20.6117	19.2863	20.8122	14.2689	17.5547	12.8315	10.8881	28.0846
636.05	18.8484	26.6395	20.6056	19.3494	20.8526	14.2371	17.5036	12.782	10.8749	28.0353
636.5	18.7932	26.6273	20.616	19.3791	20.838	14.2399	17.4385	12.725	10.8559	27.9518
636.95	18.7365	26.5973	20.6118	19.4102	20.8751	14.264	17.4423	12.6914	10.8135	27.8313
637.4	18.706	26.5661	20.617	19.3604	20.9671	14.3392	17.4632	12.6446	10.7689	27.7558
637.85	18.7464	26.5649	20.6596	19.2439	20.9072	14.3653	17.4725	12.6937	10.8327	27.689
638.3	18.7545	26.5889	20.6799	19.1874	20.8495	14.3832	17.5033	12.7799	10.8444	27.7416
638.75	18.786	26.5817	20.6872	19.1861	20.7801	14.3823	17.4952	12.8257	10.8453	27.8433
639.2	18.8518	26.5447	20.6759	19.2489	20.74	14.3412	17.4624	12.9012	10.8348	27.8993
639.65	18.8642	26.5328	20.6718	19.3355	20.7843	14.3578	17.4623	12.923	10.8215	27.9775
640.1	18.9181	26.5234	20.5443	19.4087	20.8492	14.3488	17.4674	12.896	10.8518	28.013
640.55	18.9347	26.5502	20.4148	19.4538	20.8938	14.3384	17.4776	12.8432	10.8967	27.9944
641	18.9184	26.6183	20.3212	19.4829	20.8712	14.3515	17.4984	12.7871	10.9754	27.9964
641.45	18.9211	26.6254	20.1947	19.5362	20.8409	14.3458	17.4981	12.7475	10.9981	27.9904
641.9	18.9305	26.652	20.3032	19.5627	20.8283	14.3386	17.5055	12.7484	11.0189	27.9736
642.35	18.967	26.7053	20.4264	19.5876	20.8937	14.3409	17.5777	12.8199	11.0501	28.0178
642.8	18.9995	26.717	20.5256	19.5827	21.0117	14.3394	17.6673	12.8677	10.9942	28.092
643.25	19.0117	26.7597	20.6923	19.5017	21.1243	14.3372	17.7397	12.8965	10.9926	28.1488
643.7	18.9901	26.7585	20.7425	19.4544	21.231	14.3436	17.825	12.8751	10.9438	28.1723
644.15	18.9445	26.7028	20.7577	19.4009	21.1741	14.3288	17.82	12.8427	10.8711	28.1611
644.6	18.9012	26.6646	20.7756	19.3489	21.1196	14.3094	17.8063	12.8292	10.8712	28.1096
645.05	18.9251	26.6185	20.6783	19.3594	21.0769	14.2766	17.818	12.8444	10.8328	28.1921
645.5	18.9702	26.6199	20.6055	19.3722	20.9879	14.3047	17.7829	13.0115	10.9061	28.31
645.95	19.02	26.639	20.5517	19.3869	21.0078	14.3611	17.7291	13.1663	10.983	28.4275
646.4	19.1061	26.6693	20.5393	19.4744	20.9585	14.4244	17.6669	13.3129	11.0297	28.5475
646.85	19.117	26.7077	20.5926	19.5051	20.8948	14.4804	17.7006	13.4297	11.1008	28.453
647.3	19.1094	26.6142	20.6316	19.5236	20.8866	14.4507	17.7814	13.2984	11.0337	28.339
647.75	19.1367	26.5064	20.7104	19.5984	20.8595	14.4271	17.8961	13.1474	10.9902	28.2594
648.2	19.1259	26.3957	20.7388	19.6565	20.9019	14.4207	17.9925	13.011	10.9906	28.1883
648.65	19.1585	26.3056	20.7345	19.763	20.9421	14.4575	17.9034	12.8433	10.9642	28.1956
649.1	19.2179	26.4114	20.7048	19.8315	20.908	14.5372	17.7737	12.8149	11.0132	28.219
649.55	19.2099	26.529	20.6464	19.8284	20.8748	14.5664	17.6453	12.816	11.0301	28.1872
650	19.2187	26.6474	20.5868	19.8083	20.8216	14.5553	17.5194	12.7016	10.9857	28.1622
650.45	19.1907	26.7458	20.59	19.7615	20.782	14.4841	17.4736	12.6603	10.9321	28.1565
650.9	19.1332	26.7747	20.7367	19.8102	20.7406	14.3822	17.4756	12.6093	10.8755	28.1304
651.35	19.1463	26.8523	20.8844	19.8268	20.7093	14.3272	17.5025	12.5598	10.8579	28.2161
651.8	19.1535	26.933	21.0404	19.8154	20.6678	14.2864	17.5906	12.7367	10.8639	28.3025
652.25	19.1886	26.9759	21.1635	19.8271	20.6275	14.313	17.6875	12.8736	10.9043	28.3827
652.7	19.2664	27.0783	21.0416	19.7206	20.7173	14.379	17.7426	12.9828	10.9321	28.4799
653.15	19.2719	27.1203	20.9203	19.7264	20.7842	14.4162	17.7566	13.0549	10.942	28.4184
653.6	19.3053	27.1397	20.8062	19.7604	20.8399	14.4778	17.7167	12.9835	10.9737	28.3607
654.05	19.3172	27.1918	20.6489	19.8118	20.893	14.511	17.6292	12.9201	10.9926	28.3374
654.5	19.2786	27.0838	20.6179	19.9196	20.8774	14.5415	17.5689	12.8935	11.0052	28.3005
654.95	19.3078	26.9671	20.5972	19.9482	20.8951	14.5808	17.5568	12.9225	11.0092	28.3371
655.4	19.3036	26.8937	20.5957	19.9409	20.9659	14.5847	17.5419	13.0005	11.0197	28.3615
655.85	19.3247	26.8366	20.6574	19.9056	21.0351	14.572	17.6231	13.0794	11.055	28.314
656.3	19.3902	26.8545	20.7203	19.8577	21.0789	14.5503	17.6834	13.1633	11.1381	28.2671
656.75	19.4089	26.9003	20.7662	19.8407	21.0847	14.5645	17.733	13.1955	11.223	28.2389
657.2	19.3512	26.8821	20.7682	19.8806	21.0494	14.6009	17.8418	13.1778	11.2555	28.2383
657.65	19.286	26.8552	20.7574	19.9058	20.9955	14.6584	17.9209	13.2018	11.2608	28.2784
658.1	19.1916	26.824	20.7921	19.9281	20.9652	14.6841	18.0117	13.1859	11.2124	28.3205
658.55	19.1414	26.7987	20.8183	20.0594	20.9794	14.6804	18.071	13.1831	11.1626	28.3399
659	19.1867	26.8251	20.871	20.1571	20.9846	14.6602	18.0421	13.1814	11.1596	28.3118
659.45	19.2283	26.8486	20.9389	20.2662	21.0218	14.6287	17.9824	13.1505	11.0593	28.3008
659.9	19.2662	26.9081	20.9163	20.3987	21.0692	14.6235	17.8859	13.1562	10.9559	28.2063
660.35	19.2723	26.9638	20.8979	20.2868	21.0795	14.5626	17.8198	13.1726	10.8593	28.1298
660.8	19.2725	26.9958	20.8716	20.1612	21.0774	14.5517	17.7896	13.2151	10.7619	28.0754
661.25	19.275	27.0154	20.8403	20.0367	21.0658	14.5506	17.749	13.1911	10.8671	28.0086
661.7	19.2762	26.9951	20.8578	19.8435	21.0424	14.5578	17.778	13.152	11.0149	28.1432
662.15	19.2877	26.9616	20.9107	19.7753	21.0279	14.643	17.7739	13.0863	11.1475	28.2222
662.6	19.2582	26.9345	20.98	19.7214	21.038	14.6626	17.807	13.0107	11.2257	28.3165
663.05	19.2236	26.9397	21.0421	19.6568	21.0592	14.669	17.874	12.9757	11.1911	28.4145
663.5	19.2256	26.9503	21.0848	19.733	21.0777	14.6408	17.8795	12.9447	11.1275	28.3937
663.95	19.1904	26.9869	21.119	19.8237	21.1607	14.6017	17.8991	12.9403	11.0907	28.4384
664.4	19.2188	27.0239	21.0873	19.8894	21.2684	14.6058	17.8674	12.9057	11.0848	28.4584
664.85	19.2648	27.0221	21.0027	19.9851	21.3415	14.607	17.8069	12.8772	11.0967	28.4702
665.3	19.2501	27.0529	20.9282	19.9673	21.4156	14.6534	17.8	12.8446	11.1154	28.5124
665.75	19.2875	27.0198	20.8038	19.8588	21.3582	14.6948	17.8171	12.821	11.1221	28.5324
666.2	19.3105	27.0148	20.7833	19.8044	21.2734	14.7074	17.872	12.8802	11.1859	28.5586
666.65	19.3135	27.0174	20.8266	19.7276	21.2277	14.7471	17.9638	12.9793	11.2337	28.5361
667.1	19.4011	26.957	20.8511	19.6943	21.1746	14.7778	17.9895	13.0898	11.2749	28.4698
667.55	19.4972	26.9639	20.9317	19.8045	21.2152	14.7871	17.9841	13.1845	11.2904	28.4223
668	19.5502	26.9201	20.9371	19.9122	21.3043	14.7363	17.9634	13.2378	11.2296	28.3654
668.45	19.5977	26.8923	20.9015	20.0241	21.3749	14.6473	17.9177	13.2489	11.1671	28.2932
668.9	19.5807	26.935	20.8991	20.185	21.4459	14.5392	17.9259	13.2896	11.1112	28.2428
669.35	19.4943	26.9578	20.8486	20.2589	21.475	14.432	17.9391	13.3126	11.0934	28.1719
669.8	19.427	26.9885	20.8247	20.2769	21.4286	14.4922	17.9294	13.3327	11.1217	28.1295
670.25	19.3747	27.0431	20.8238	20.2944	21.3653	14.5961	17.9293	13.3642	11.1683	28.2509
670.7	19.3437	27.0471	20.8428	20.1948	21.2696	14.7066	17.9013	13.3187	11.2196	28.3805
671.15	19.3695	27.0733	20.8845	20.1323	21.192	14.8416	17.8821	13.3167	11.2431	28.5315
671.6	19.4298	27.1222	20.9471	20.1051	21.1556	14.8779	17.9085	13.2895	11.2395	28.6404
672.05	19.4924	27.1252	21.0336	20.0984	21.1495	14.8832	17.9616	13.2676	11.2327	28.6608
672.5	19.5324	27.1449	21.0923	20.1556	21.0868	14.8807	18.0243	13.2677	11.2232	28.6732
672.95	19.5823	27.1348	21.156	20.2046	21.0195	14.8948	18.0886	13.2353	11.2241	28.6445
673.4	19.6078	27.1115	21.184	20.2247	20.9268	14.9162	18.1144	13.2124	11.1858	28.653
673.85	19.6272	27.1116	21.1511	20.2089	20.8008	14.9506	18.0959	13.2739	11.1656	28.6602
674.3	19.6796	27.136	21.1091	20.156	20.9155	15.0149	18.0978	13.3486	11.131	28.6582
674.75	19.6712	27.168	21.0691	20.0947	21.0342	15.0015	18.1134	13.4456	11.1246	28.6943
675.2	19.6359	27.2119	21.0831	20.089	21.166	14.9614	18.1697	13.5778	11.219	28.7011
675.65	19.6074	27.2429	21.1459	20.1113	21.3147	14.9114	18.2271	13.5042	11.2547	28.6895
676.1	19.5457	27.2452	21.2286	20.1727	21.3077	14.8125	18.2666	13.4309	11.322	28.7087
676.55	19.5439	27.2319	21.3036	20.3386	21.336	14.7692	18.3014	13.3397	11.3553	28.6953
677	19.5773	27.2209	21.2965	20.4476	21.3666	14.7719	18.2902	13.2368	11.3219	28.7314
677.45	19.6043	27.2166	21.2826	20.561	21.4233	14.7833	18.2895	13.2612	11.3515	28.7873
677.9	19.6697	27.2209	21.2355	20.7	21.4868	14.8446	18.2882	13.2862	11.3401	28.8055
678.35	19.7015	27.279	21.1746	20.6276	21.4956	14.9316	18.2583	13.3115	11.3279	28.8328
678.8	19.7337	27.2933	21.1625	20.5931	21.4962	14.9942	18.2499	13.3204	11.3237	28.8077
679.25	19.7573	27.3004	21.1385	20.5232	21.4388	14.9782	18.1982	13.3142	11.286	28.7587
679.7	19.7603	27.3248	21.127	20.3756	21.39	14.9367	18.1026	13.3056	11.2944	28.715
680.15	19.7983	27.2703	21.1448	20.3361	21.3576	14.8487	18.0132	13.322	11.3248	28.6854
680.6	19.8139	27.3042	21.1675	20.3043	21.3433	14.7638	17.9306	13.3172	11.3747	28.6963
681.05	19.8496	27.3422	21.2121	20.2833	21.4102	14.8339	17.9122	13.3265	11.4185	28.7467
681.5	19.8959	27.3192	21.2572	20.331	21.4675	14.8973	17.9831	13.3452	11.4251	28.835
681.95	19.9164	27.359	21.301	20.3684	21.5426	14.9799	18.0653	13.3278	11.436	28.8858
682.4	19.9185	27.2381	21.2934	20.37	21.6017	15.0576	18.1659	13.384	11.4882	28.9352
682.85	19.9083	27.1023	21.2339	20.4051	21.5797	15.0145	18.2428	13.401	11.5912	28.9613
683.3	19.8669	27.0338	21.1674	20.4023	21.5296	14.9945	18.2625	13.4172	11.7145	28.9711
683.75	19.8092	26.9392	21.0597	20.3399	21.4524	14.9862	18.2814	13.4387	11.7867	29.1473
684.2	19.8092	27.0387	21.0205	20.2827	21.387	15.0332	18.2363	13.413	11.7342	29.2748
684.65	19.7973	27.1919	21.0162	20.1954	21.3566	15.148	18.2009	13.4077	11.6246	29.3937
685.1	19.8043	27.2945	21.0434	20.1201	21.3769	15.2619	18.185	13.4385	11.5254	29.4889
685.55	19.849	27.4175	21.1168	20.1389	21.4402	15.3297	18.1603	13.4849	11.4629	29.3362
686	19.8486	27.4625	21.1571	20.1966	21.5041	15.283	18.1687	13.5413	11.4698	29.2153
686.45	19.8935	27.4741	21.1839	20.2666	21.5875	15.2149	18.1771	13.6229	11.4925	29.1282
686.9	19.9401	27.5466	21.1906	20.3811	21.6492	15.1246	18.2272	13.5957	11.5083	29.0587
687.35	19.965	27.5996	21.2038	20.494	21.6491	15.0605	18.2883	13.5625	11.5307	29.0877
687.8	20.0011	27.64	21.2254	20.5827	21.6462	15.0685	18.3656	13.511	11.5754	29.1447
688.25	19.9841	27.6483	21.2616	20.6508	21.6407	15.0456	18.4417	13.4482	11.6171	29.1166
688.7	19.9661	27.6061	21.2035	20.6299	21.6571	15.0436	18.4042	13.4707	11.6171	29.0654
689.15	19.9355	27.5714	21.1116	20.5947	21.7129	15.0453	18.3848	13.4996	11.6003	29.0412
689.6	19.9213	27.5603	21.0117	20.5423	21.7659	15.0439	18.3554	13.5123	11.542	28.9715
690.05	19.9403	27.5526	20.9292	20.5096	21.7894	15.0373	18.3239	13.5183	11.4955	29.0224
690.5	19.9594	27.5837	21.056	20.5212	21.8096	15.0882	18.3701	13.529	11.487	29.0752
690.95	20.0028	27.5888	21.1879	20.5493	21.809	15.1342	18.3758	13.5055	11.4947	29.1396
691.4	20.0379	27.5558	21.3423	20.5967	21.7988	15.1914	18.386	13.5584	11.5405	29.2241
691.85	20.0508	27.5846	21.5137	20.636	21.7852	15.2932	18.4093	13.6064	11.5657	29.2224
692.3	20.0779	27.5493	21.5866	20.7033	21.7089	15.2517	18.4263	13.6461	11.5718	29.2421
692.75	20.0805	27.544	21.658	20.7104	21.6531	15.2211	18.4909	13.7434	11.5795	29.2058
693.2	20.0794	27.5529	21.6822	20.7007	21.6101	15.1693	18.5444	13.751	11.5651	29.1712
693.65	20.0994	27.5191	21.6178	20.6684	21.597	15.1053	18.5779	13.789	11.5836	29.1447
694.1	20.0984	27.5203	21.5087	20.5586	21.5837	15.1094	18.5879	13.7827	11.628	29.1131
694.55	20.1304	27.5277	21.408	20.4493	21.5671	15.1199	18.4875	13.763	11.6435	29.1166
695	20.1522	27.536	21.3611	20.3589	21.5375	15.1393	18.3758	13.7716	11.6506	29.095
695.45	20.1607	27.5705	21.3866	20.3269	21.4711	15.1835	18.2403	13.7406	11.6632	29.096
695.9	20.1798	27.6563	21.4422	20.3591	21.51	15.2279	18.128	13.7256	11.6765	29.0949
696.35	20.1842	27.7077	21.4963	20.4971	21.5452	15.2505	18.1473	13.6464	11.8027	29.0927
696.8	20.198	27.7778	21.5144	20.6146	21.5923	15.2645	18.2044	13.5558	11.9714	29.1037
697.25	20.1922	27.8376	21.4985	20.6905	21.6947	15.2272	18.2972	13.4732	12.0875	29.1189
697.7	20.1898	27.835	21.4715	20.7483	21.7696	15.2281	18.3765	13.4019	12.1597	29.1579
698.15	20.183	27.8208	21.4328	20.7041	21.825	15.2316	18.4199	13.3861	12.0755	29.1761
698.6	20.2055	27.7667	21.3819	20.6978	21.9146	15.2295	18.4455	13.4303	11.9543	29.2243
699.05	20.1882	27.6961	21.3612	20.6975	21.9624	15.2537	18.4619	13.478	11.8657	29.2575
699.5	20.1503	27.628	21.4571	20.7253	21.9461	15.2314	18.4953	13.5669	11.8223	29.2721
699.95	20.0998	27.6172	21.5932	20.7658	21.9396	15.2167	18.5157	13.6483	11.8161	29.3495
700.4	19.9669	27.6581	21.7429	20.754	21.8439	15.2051	18.546	13.6897	11.8208	29.403
700.85	19.9531	27.6748	21.894	20.7475	21.8686	15.1867	18.57	13.7254	11.8085	29.4534
701.3	19.9566	27.7113	21.8537	20.6953	21.9328	15.192	18.579	13.696	11.7689	29.4852
701.75	19.9823	27.7147	21.7693	20.6123	22.0483	15.2209	18.6354	13.679	11.7587	29.4535
702.2	20.0955	27.6532	21.7077	20.5725	22.2316	15.256	18.6397	13.641	11.7174	29.4134
702.65	20.1654	27.6233	21.5339	20.5556	22.1914	15.3043	18.6409	13.6462	11.691	29.3771
703.1	20.2314	27.614	21.4437	20.5605	22.1425	15.3575	18.6506	13.6714	11.679	29.3785
703.55	20.2757	27.643	21.3662	20.6908	22.0352	15.384	18.5864	13.7149	11.6438	29.3984
704	20.2718	27.7361	21.2711	20.813	21.9141	15.4238	18.585	13.7827	11.6463	29.4168
704.45	20.1677	27.8282	21.3353	20.9068	21.9253	15.4408	18.6049	13.7929	11.6641	29.4369
704.9	20.0705	27.8485	21.4091	21.0478	21.9357	15.4218	18.6418	13.8208	11.6777	29.4273
705.35	20.0018	27.8114	21.5098	21.1109	21.9355	15.3797	18.6671	13.7903	11.7045	29.5454
705.8	19.9666	27.7587	21.628	21.1717	21.9291	15.3202	18.6701	13.8743	11.7845	29.7142
706.25	20.1235	27.7318	21.6896	21.1992	21.8916	15.2822	18.6492	13.9609	11.8483	29.8898
706.7	20.2863	27.7615	21.7438	21.1428	21.8861	15.2622	18.5792	14.0346	11.9305	30.0552
707.15	20.4301	27.8656	21.7443	21.0914	21.9836	15.2682	18.5573	14.1307	12.0405	29.9805
707.6	20.5438	27.961	21.7417	21.0156	22.0756	15.2625	18.5464	14.0145	12.0336	29.8495
708.05	20.5756	28.0288	21.7321	20.9754	22.181	15.2644	18.5616	13.9347	12.0224	29.729
708.5	20.5751	28.0718	21.7382	20.9771	22.2516	15.2331	18.6118	13.8596	11.9562	29.6143
708.95	20.5882	28.036	21.7882	20.9513	22.1735	15.1901	18.6708	13.7967	11.866	29.5962
709.4	20.6187	28.0019	21.8106	20.9946	22.1526	15.1858	18.6592	13.8188	11.8248	29.6005
709.85	20.6067	27.9529	21.8819	21.0476	22.1456	15.1524	18.6302	13.8441	11.777	29.5646
710.3	20.6414	27.9221	21.9173	21.0884	22.1221	15.1838	18.6084	13.7779	11.7882	29.5607
710.75	20.6475	27.9263	21.9264	21.1477	22.1995	15.2444	18.5539	13.7111	11.7886	29.5663
711.2	20.6361	27.9184	21.9339	21.0871	22.2058	15.257	18.596	13.6629	11.7476	29.5606
711.65	20.6394	27.9568	21.8588	21.0305	22.1541	15.2604	18.6515	13.5853	11.7466	29.6553
712.1	20.6049	28.0035	21.8107	20.9637	22.1313	15.2608	18.6825	13.7055	11.7371	29.7372
712.55	20.6061	28	21.7606	20.849	22.0756	15.2347	18.7182	13.8003	11.754	29.834
713	20.5996	27.9985	21.7441	20.8341	22.048	15.2229	18.7214	13.8885	11.8474	29.9381
713.45	20.5789	27.9515	21.7463	20.8174	22.0831	15.227	18.7101	13.9839	11.8944	29.8967
713.9	20.5573	27.8856	21.7427	20.8305	22.1099	15.2175	18.7255	13.9528	11.9057	29.8266
714.35	20.5015	27.9159	21.781	20.9593	22.1478	15.2072	18.7769	13.9756	11.9085	29.7653
714.8	20.4829	27.969	21.8009	21.0328	22.1684	15.2342	18.8118	14.0356	11.9105	29.7004
715.25	20.4961	28.0692	21.8306	21.1086	22.1831	15.307	18.8711	14.168	12.0313	29.7183
715.7	20.5441	28.2167	21.8544	21.1517	22.0659	15.3308	18.9146	14.323	12.1963	29.7574
716.15	20.6125	28.2981	21.8248	21.1404	21.9311	15.3911	18.9198	14.4236	12.3324	29.7782
716.6	20.6462	28.3551	21.8132	21.1987	21.8197	15.4179	18.9382	14.4573	12.4098	29.7661
717.05	20.6338	28.3445	21.788	21.2247	21.6755	15.4132	18.9515	14.3536	12.3081	29.7625
717.5	20.5963	28.2657	21.7377	21.2851	21.815	15.471	18.9374	14.2312	12.1753	29.7676
717.95	20.5425	28.2059	21.7235	21.3411	21.968	15.4198	18.9385	14.1472	12.0715	29.7698
718.4	20.5311	28.1777	21.6794	21.3104	22.1095	15.4031	18.9397	14.0759	11.9921	29.8267
718.85	20.6066	28.1897	21.6593	21.2787	22.2605	15.3805	18.9072	14.0745	11.9347	29.8659
719.3	20.6835	28.2366	21.7086	21.2442	22.2836	15.3463	18.9345	14.0801	11.8897	29.8971
719.75	20.8074	28.2985	21.7563	21.1346	22.3318	15.4517	18.9489	14.0168	11.9155	29.9144
720.2	20.8999	28.3378	21.844	21.0982	22.4094	15.5251	18.9773	13.9827	11.9577	29.9021
720.65	20.9066	28.3773	21.9135	21.0794	22.5324	15.564	19.022	13.9291	12.1078	29.8723
721.1	20.9238	28.4061	21.9379	21.0356	22.5987	15.6004	19.0083	13.9221	12.2578	29.8323
721.55	20.8714	28.402	21.9444	21.1291	22.6227	15.5842	19.0225	13.9963	12.263	29.823
722	20.8285	28.3885	21.9039	21.1892	22.6167	15.5519	19.0268	14.0519	12.2541	29.8292
722.45	20.8048	28.3588	21.9028	21.2556	22.5595	15.6198	19.0276	14.1274	12.2068	29.8366
722.9	20.7588	28.4422	21.8964	21.3536	22.5365	15.6546	19.0842	14.1421	12.1422	29.8499
723.35	20.7842	28.5151	21.8924	21.3685	22.5145	15.6709	19.1199	14.1173	12.1656	29.8538
723.8	20.7981	28.5879	21.9246	21.3671	22.4962	15.7174	19.1433	14.0857	12.1904	29.874
724.25	20.8168	28.6703	21.9376	21.3475	22.4937	15.6637	19.1488	14.0529	12.1539	29.9201
724.7	20.8485	28.5472	22.0104	21.3095	22.5025	15.6476	19.1053	14.1306	12.1398	29.9955
725.15	20.8121	28.497	22.0745	21.2993	22.5404	15.658	19.0489	14.2414	12.1234	30.0831
725.6	20.7685	28.4635	22.1299	21.3088	22.5533	15.6484	18.9732	14.3866	12.0967	30.1408
726.05	20.7219	28.4202	22.1516	21.3552	22.5566	15.6572	18.9515	14.5322	12.1394	30.1761
726.5	20.6744	28.477	22.0684	21.3633	22.5512	15.6581	18.9564	14.4992	12.1701	30.1818
726.95	20.6806	28.4552	22.0268	21.363	22.5374	15.6518	19.0027	14.4159	12.144	30.096
727.4	20.7296	28.4528	21.9654	21.2895	22.5598	15.6315	19.0813	14.3284	12.1404	30.0253
727.85	20.8117	28.3799	21.9466	21.2032	22.5671	15.6062	19.1322	14.2182	12.1162	29.9832
728.3	20.9046	28.2677	21.9556	21.1702	22.5738	15.5713	19.1798	14.1878	12.1001	29.9333
728.75	20.97	28.2189	21.93	21.1363	22.6248	15.5163	19.1907	14.1812	12.1153	30.04
729.2	20.9962	28.1103	21.9117	21.2533	22.6406	15.5176	19.202	14.1274	12.1503	30.1225
729.65	20.9749	28.2058	21.8692	21.3645	22.6989	15.5659	19.2182	14.0997	12.1484	30.1432
730.1	20.9411	28.3753	21.9005	21.4727	22.756	15.6155	19.2289	14.0811	12.1316	30.1708
730.55	20.901	28.4827	21.9445	21.5578	22.7001	15.6977	19.241	14.0852	12.1458	30.0774
731	20.8664	28.6515	22.0029	21.5728	22.6757	15.7437	19.2557	14.1137	12.1042	29.9997
731.45	20.8611	28.7292	22.0749	21.5901	22.6658	15.7408	19.2778	14.1562	12.1107	29.9782
731.9	20.8489	28.7568	22.0748	21.5712	22.6569	15.7996	19.2991	14.1944	12.1347	29.9548
732.35	20.8633	28.84	22.1086	21.5704	22.7198	15.827	19.3211	14.2086	12.1165	29.981
732.8	20.8672	28.8788	22.1178	21.5279	22.7916	15.8713	19.3123	14.2284	12.1058	30.0518
733.25	20.8758	28.9655	22.12	21.4429	22.8165	15.9451	19.2664	14.2296	12.0976	30.1215
733.7	20.8795	29.0668	22.132	21.3874	22.8566	15.9082	19.2048	14.2283	12.0855	30.1798
734.15	20.8806	29.158	22.0858	21.3416	22.8741	15.8589	19.1368	14.2103	12.157	30.2237
734.6	20.9104	29.2713	22.0558	21.4292	22.8596	15.8067	19.0924	14.1859	12.23	30.2274
735.05	20.9321	29.2143	22.0469	21.5665	22.8513	15.7618	19.0667	14.1515	12.2789	30.2037
735.5	21.0274	29.1649	22.0507	21.73	22.764	15.7867	19.0861	14.1632	12.3349	30.1772
735.95	21.1026	29.0679	22.0524	21.8832	22.7	15.8355	19.0985	14.1937	12.2945	30.1701
736.4	21.1778	28.9485	22.0684	21.8727	22.6495	15.8729	19.0996	14.2505	12.2929	30.12
736.85	21.2738	28.8987	22.0458	21.8592	22.6289	15.811	19.1346	14.3307	12.3196	30.0833
737.3	21.2724	28.8029	22.0341	21.7972	22.6859	15.6735	19.1389	14.3584	12.3117	30.0927
737.75	21.2654	28.7494	22.0584	21.7594	22.7344	15.556	19.2291	14.4119	12.3124	30.1034
738.2	21.232	28.6989	22.0768	21.7684	22.799	15.4305	19.3438	14.4113	12.2728	30.1627
738.65	21.1725	28.6956	22.1173	21.7322	22.8461	15.4733	19.4195	14.432	12.212	30.2389
739.1	21.1452	28.7453	22.1633	21.7287	22.9037	15.6149	19.485	14.4593	12.1893	30.3068
739.55	21.1346	28.7922	22.1682	21.6731	22.9288	15.751	19.4669	14.4826	12.2151	30.3592
740	21.1465	28.8692	22.1625	21.6316	22.9391	15.9251	19.4322	14.551	12.2499	30.4002
740.45	21.1659	28.8981	22.1534	21.6534	22.9296	16.0087	19.3914	14.5538	12.2699	30.4291
740.9	21.1969	28.899	22.1295	21.6167	22.8885	16.0595	19.3819	14.5474	12.2838	30.4745
741.35	21.2113	28.8546	22.1552	21.6228	22.9158	16.1406	19.4263	14.4915	12.2297	30.5055
741.8	21.2156	28.7997	22.1948	21.626	22.9778	16.1763	19.475	14.4431	12.1937	30.5544
742.25	21.1898	28.7839	22.2308	21.5746	23.0302	16.2008	19.5484	14.377	12.2064	30.5841
742.7	21.1532	28.8267	22.1372	21.5902	23.1234	16.1877	19.5908	14.3592	12.1996	30.5605
743.15	21.1563	28.9402	22.0115	21.6172	23.1911	16.0946	19.5903	14.3712	12.2579	30.5405
743.6	21.1701	29.0467	21.8452	21.6752	23.1954	16.0188	19.5981	14.3241	12.2254	30.477
744.05	21.2284	29.1356	21.6611	21.769	23.3435	15.9693	19.6306	14.349	12.1358	30.3792
744.5	21.296	29.1526	21.7286	21.8236	23.4603	15.956	19.6856	14.3433	12.0899	30.3125
744.95	21.4212	29.1377	21.8105	21.833	23.5449	15.94	19.7184	14.3485	12.0164	30.2829
745.4	21.5244	29.1383	21.941	21.8398	23.6338	15.9096	19.7505	14.4213	12.0911	30.2645
745.85	21.5776	29.1766	22.13	21.8454	23.5068	15.8573	19.7226	14.4926	12.1826	30.3668
746.3	21.6396	29.2009	22.2334	21.7659	23.3775	15.771	19.697	14.5239	12.223	30.4711
746.75	21.5456	29.1947	22.3375	21.7412	23.2757	15.734	19.7402	14.5433	12.2921	30.5313
747.2	21.4601	29.1944	22.4149	21.6459	23.2281	15.7307	19.738	14.5436	12.309	30.6349
747.65	21.436	29.0952	22.4429	21.5266	23.2594	15.7557	19.7459	14.5098	12.3123	30.6273
748.1	21.3871	29.0512	22.4532	21.6244	23.2871	15.8362	19.7308	14.5698	12.3121	30.5822
748.55	21.4653	29.0517	22.4656	21.6709	23.2822	15.9055	19.6441	14.6047	12.3134	30.5685
749	21.5499	28.9822	22.4977	21.7975	23.236	15.9507	19.5784	14.6329	12.2877	30.5272
749.45	21.6079	29.0096	22.5519	22.0063	23.2315	15.9822	19.5329	14.6525	12.3291	30.5578
749.9	21.7012	29.0257	22.5529	22.1019	23.2045	16.0199	19.5155	14.5972	12.4369	30.5988
750.35	21.7543	29.0369	22.5169	22.2237	23.2752	16.0778	19.5512	14.5505	12.475	30.6094
750.8	21.8126	29.1178	22.4471	22.2711	23.3636	16.0223	19.6261	14.5153	12.5518	30.6159
751.25	21.8993	29.1761	22.3646	22.1959	23.4204	15.9726	19.7095	14.5198	12.553	30.5766
751.7	21.9649	29.2075	22.3609	22.1017	23.5391	15.8439	19.7522	14.5266	12.4918	30.5734
752.15	21.8922	29.2251	22.402	21.9587	23.5465	15.72	19.7709	14.5669	12.4843	30.5993
752.6	21.7966	29.2593	22.4715	21.8845	23.5425	15.8276	19.7635	14.5798	12.4153	30.5926
753.05	21.6541	29.2692	22.5252	21.8786	23.5361	15.9288	19.7405	14.5338	12.3943	30.5988
753.5	21.4988	29.3036	22.4465	21.8967	23.465	16.0798	19.7635	14.515	12.4767	30.5656
753.95	21.4817	29.3505	22.3413	22.0122	23.4492	16.196	19.7967	14.515	12.5597	30.5153
754.4	21.4903	29.3253	22.2516	22.0905	23.4519	16.1833	19.8183	14.5076	12.7006	30.5453
754.85	21.5047	29.3106	22.1825	22.1529	23.4885	16.1565	19.8465	14.5663	12.8221	30.567
755.3	21.507	29.3162	22.2332	22.2001	23.5393	16.1275	19.8483	14.5953	12.7642	30.5882
755.75	21.4881	29.299	22.2959	22.1603	23.5892	16.0733	19.8246	14.5711	12.697	30.6014
756.2	21.4604	29.3186	22.35	22.1371	23.6382	16.0575	19.8092	14.5803	12.5788	30.5858
756.65	21.4348	29.3512	22.3582	22.1084	23.6532	16.0602	19.7882	14.5833	12.4485	30.586
757.1	21.4472	29.3478	22.349	22.0385	23.6511	16.0731	19.7717	14.6353	12.4184	30.6394
757.55	21.4981	29.3792	22.3774	22.0051	23.618	16.0859	19.7998	14.7198	12.3959	30.7122
758	21.5157	29.369	22.3794	21.9692	23.5729	16.0588	19.8515	14.8245	12.3725	30.7426
758.45	21.5169	29.3323	22.4651	21.9496	23.532	16.015	19.9269	14.8967	12.3604	30.7739
758.9	21.5159	29.2917	22.5497	22.0095	23.5753	15.9355	20.0102	14.919	12.3322	30.7852
759.35	21.4802	29.2278	22.5666	22.0912	23.5927	15.9393	20.0764	14.9099	12.264	30.8141
759.8	21.4821	29.2305	22.5811	22.1483	23.6009	15.9649	20.131	14.8644	12.267	30.8649
760.25	21.5283	29.2445	22.537	22.2032	23.6379	16.0132	20.1539	14.8283	12.2924	30.9131
760.7	21.5545	29.2881	22.4722	22.2087	23.607	16.097	20.1682	14.817	12.3536	30.9417
761.15	21.5994	29.3445	22.4255	22.1692	23.6239	16.1288	20.1558	14.8249	12.4609	30.9136
761.6	21.6682	29.3725	22.4045	22.1528	23.6463	16.1505	20.1088	14.8421	12.5207	30.9204
762.05	21.7284	29.4432	22.4318	22.111	23.6208	16.1383	20.0801	14.8806	12.5347	30.9246
762.5	21.7928	29.5002	22.5004	22.1091	23.6323	16.0998	20.0163	14.9136	12.5372	30.9218
762.95	21.8105	29.5816	22.6166	22.1333	23.6741	16.059	19.9748	14.9368	12.5792	30.9078
763.4	21.7986	29.7015	22.7084	22.1749	23.7377	16.0383	19.9922	14.9663	12.6316	30.8437
763.85	21.7802	29.7798	22.6366	22.2435	23.8275	16.0519	19.99	14.9305	12.7276	30.7639
764.3	21.7773	29.8502	22.5206	22.3381	23.8886	16.0929	20.0585	14.918	12.7845	30.6879
764.75	21.8011	29.8623	22.3233	22.4113	23.8889	16.1506	20.1291	14.8791	12.7384	30.7271
765.2	21.8062	29.828	22.1274	22.4626	23.8324	16.1905	20.1459	14.8445	12.6688	30.8144
765.65	21.7974	29.7978	22.1753	22.5173	23.7634	16.2333	20.1709	14.8546	12.5877	30.945
766.1	21.7508	29.8047	22.2253	22.4758	23.7111	16.2657	20.1627	14.8329	12.5206	31.0859
766.55	21.7203	29.8161	22.3541	22.4539	23.6934	16.3143	20.0779	14.8776	12.507	31.1372
767	21.6877	29.8336	22.5523	22.4153	23.7346	16.4025	20.0264	14.8851	12.5172	31.1809
767.45	21.6636	29.8326	22.6175	22.3795	23.8357	16.4683	19.9712	14.9165	12.5262	31.2085
767.9	21.6624	29.7529	22.698	22.4021	23.9209	16.5114	19.918	14.9436	12.5305	31.2235
768.35	21.6811	29.6547	22.736	22.4277	23.998	16.5027	20.0043	14.9626	12.5495	31.288
768.8	21.7334	29.5413	22.6903	22.4926	24.0414	16.4059	20.0403	14.9983	12.5585	31.3198
769.25	21.7915	29.4622	22.71	22.5356	24.0141	16.3136	20.088	15.0224	12.5399	31.3059
769.7	21.8573	29.4732	22.7076	22.5589	23.988	16.2443	20.1694	15.0589	12.5402	31.2495
770.15	21.8696	29.568	22.732	22.5541	23.9551	16.1748	20.1804	15.028	12.5247	31.1457
770.6	21.8826	29.6987	22.7639	22.5266	23.9493	16.1736	20.2744	14.9865	12.5143	31.048
771.05	21.8874	29.8204	22.7331	22.5086	23.9641	16.1587	20.3668	14.9149	12.5397	30.967
771.5	21.8789	29.8846	22.7317	22.4953	23.9868	16.1646	20.3736	14.8539	12.5868	30.8978
771.95	21.8982	29.9045	22.6872	22.4389	23.9154	16.2003	20.3956	14.8435	12.612	30.8442
772.4	21.8945	29.8938	22.69	22.3921	23.8249	16.2156	20.3544	14.8521	12.6872	30.8033
772.85	21.889	29.864	22.7463	22.3575	23.7421	16.2781	20.2908	14.8917	12.7499	30.7768
773.3	21.9031	29.8812	22.7988	22.3012	23.6317	16.3318	20.3103	14.928	12.7822	30.8887
773.75	21.9165	29.9134	22.9103	22.365	23.7196	16.3927	20.2992	14.9486	12.829	31.0012
774.2	21.937	29.9722	22.9818	22.4421	23.8288	16.4709	20.41	14.9568	12.7789	31.1036
774.65	21.9634	30.0575	23.1087	22.478	23.9294	16.512	20.555	14.9579	12.7253	31.2405
775.1	21.9785	30.0653	23.206	22.5452	24.0585	16.5018	20.6398	14.9352	12.688	31.275
775.55	21.9859	30.0449	23.265	22.5711	24.0961	16.4893	20.7334	14.9546	12.6569	31.2909
776	21.9794	30.0244	23.3089	22.5674	24.1141	16.4432	20.6172	14.995	12.679	31.2943
776.45	21.973	30.0144	23.1488	22.5942	24.1436	16.4237	20.5072	14.9986	12.7028	31.2515
776.9	21.975	30.0498	23.0475	22.6354	24.1917	16.4274	20.4228	15.0202	12.668	31.2309
777.35	21.9924	30.0806	22.9429	22.6693	24.2478	16.4324	20.3684	14.9958	12.6197	31.2213
777.8	22.0595	30.0837	22.8528	22.6855	24.301	16.4689	20.4196	15.053	12.5399	31.2363
778.25	22.111	30.0456	22.8714	22.6976	24.3288	16.4705	20.4532	15.1516	12.4547	31.2168
778.7	22.1554	30.0142	22.8531	22.7035	24.4005	16.5051	20.4751	15.2434	12.4609	31.1734
779.15	22.1678	30.0185	22.8359	22.61	24.4366	16.5112	20.4727	15.35	12.4901	31.1806
779.6	22.1347	29.9989	22.8912	22.5397	24.4744	16.5106	20.4658	15.2819	12.5386	31.1934
780.05	22.1061	29.9678	22.9793	22.4788	24.539	16.5401	20.4279	15.2069	12.609	31.2853
780.5	22.0635	29.9377	23.0863	22.3718	24.4542	16.5344	20.4418	15.1615	12.6267	31.386
780.95	22.068	29.8877	23.1618	22.4087	24.4111	16.563	20.4585	15.1091	12.641	31.4079
781.4	22.082	29.9267	23.1856	22.4733	24.3893	16.5743	20.5106	15.1395	12.6843	31.4188
781.85	22.1196	29.9955	23.1918	22.544	24.3555	16.5759	20.6015	15.1722	12.798	31.4024
782.3	22.1858	30.0884	23.1457	22.7107	24.4388	16.5815	20.619	15.1846	12.9367	31.3546
782.75	22.1916	30.177	23.2065	22.8432	24.498	16.5433	20.6113	15.2154	13.0665	31.3534
783.2	22.2006	30.2272	23.2573	22.9251	24.5142	16.5127	20.5513	15.2301	13.1603	31.3634
783.65	22.197	30.2923	23.3278	22.9771	24.5519	16.4429	20.469	15.2491	13.0884	31.3773
784.1	22.1609	30.2655	23.5035	22.9084	24.523	16.4002	20.4215	15.2751	12.9871	31.4229
784.55	22.1478	30.2365	23.6718	22.8244	24.5014	16.4038	20.4161	15.2605	12.8884	31.4812
785	22.039	30.16	23.8697	22.7895	24.5444	16.435	20.4358	15.2607	12.8049	31.5327
785.45	21.9304	30.0917	24.0453	22.8068	24.5412	16.5101	20.4737	15.2314	12.7841	31.5682
785.9	21.8315	30.1033	24.1124	22.8861	24.5808	16.5657	20.4843	15.1751	12.7747	31.6266
786.35	21.7706	30.1313	24.0144	22.9349	24.5794	16.5956	20.4829	15.1518	12.7635	31.6496
786.8	21.921	30.2261	23.8511	22.9454	24.5193	16.6077	20.4756	15.1472	12.7546	31.7331
787.25	22.0669	30.2641	23.6748	22.906	24.4868	16.6202	20.4659	15.1443	12.7813	31.8148
787.7	22.2329	30.3164	23.5224	22.8803	24.4327	16.6427	20.5408	15.1411	12.8054	31.8806
788.15	22.3378	30.3351	23.5326	22.8917	24.4405	16.6723	20.6185	15.1382	12.832	31.9595
788.6	22.3125	30.2812	23.6209	22.9367	24.4825	16.7056	20.6886	15.1125	12.8331	31.8874
789.05	22.2967	30.2529	23.6536	22.9914	24.5374	16.7057	20.7818	15.1326	12.8002	31.8397
789.5	22.2586	30.1846	23.6873	22.998	24.6109	16.6481	20.8078	15.1801	12.8038	31.7598
789.95	22.2609	30.1733	23.5775	22.9985	24.6474	16.5813	20.7632	15.2288	12.8192	31.6773
790.4	22.2667	30.2135	23.4207	22.9851	24.6733	16.4886	20.7296	15.2791	12.868	31.6704
790.85	22.2685	30.3023	23.3706	23.0049	24.6734	16.4109	20.6311	15.3288	12.9372	31.6251
791.3	22.2862	30.4103	23.3606	23.0694	24.648	16.4223	20.5297	15.369	12.8905	31.6296
791.75	22.3203	30.4441	23.5619	23.1384	24.5863	16.4243	20.5602	15.4352	12.7968	31.6297
792.2	22.3932	30.483	23.7639	23.205	24.5099	16.4264	20.6038	15.5306	12.6907	31.6206
792.65	22.4513	30.4338	23.9337	23.2278	24.4669	16.4652	20.6867	15.5979	12.5804	31.6601
793.1	22.5062	30.3609	24.0689	23.1761	24.457	16.4771	20.7833	15.6727	12.6287	31.7081
793.55	22.5149	30.3533	23.9706	23.0865	24.5456	16.5368	20.7946	15.6596	12.7125	31.763
794	22.4387	30.3589	23.8491	22.9959	24.6234	16.6531	20.7751	15.6032	12.7905	31.8341
794.45	22.3874	30.4552	23.7124	22.9011	24.6583	16.7279	20.8409	15.5193	12.8839	31.8781
794.9	22.3449	30.5762	23.5186	22.934	24.6783	16.7726	20.9122	15.4251	12.9118	31.8257
795.35	22.3359	30.7443	23.4438	23.014	24.6537	16.7909	21.0273	15.3737	12.946	31.8063
795.8	22.4304	30.8283	23.3651	23.084	24.658	16.7342	21.1646	15.3385	13.0092	31.8107
796.25	22.5268	30.8741	23.2693	23.1712	24.6878	16.6843	21.1484	15.3473	13.0287	31.8039
796.7	22.5897	30.8942	23.2597	23.1944	24.7069	16.6597	21.12	15.3384	12.9678	31.8887
797.15	22.6321	30.7785	23.231	23.207	24.7165	16.5988	21.0219	15.3623	12.9128	31.8973
797.6	22.619	30.7345	23.2235	23.2222	24.7153	16.5872	20.9259	15.368	12.8048	31.8914
798.05	22.5696	30.6599	23.2313	23.2404	24.727	16.5883	20.8587	15.3606	12.7447	31.8793
798.5	22.5248	30.6064	23.218	23.2391	24.7623	16.6098	20.8031	15.3647	12.8126	31.8315
798.95	22.511	30.6494	23.246	23.2015	24.7985	16.6722	20.7896	15.3498	12.8429	31.8212
799.4	22.4461	30.6809	23.3323	23.1581	24.8736	16.7312	20.7697	15.3569	12.9051	31.7951
799.85	22.382	30.7536	23.4175	23.1341	24.8981	16.7868	20.8069	15.3517	12.9408	31.8152
800.3	22.3646	30.8052	23.4911	22.9917	24.9022	16.7934	20.8297	15.3796	12.9393	31.8364
800.75	22.2899	30.8033	23.556	22.8867	24.8965	16.801	20.8844	15.4022	12.9904	31.8764
801.2	22.2985	30.8119	23.5434	22.8259	24.8222	16.7855	20.9222	15.4486	13.0605	31.9595
801.65	22.3576	30.789	23.5277	22.7285	24.7818	16.7687	20.9527	15.4915	13.1254	32.0813
802.1	22.3826	30.774	23.5081	22.8851	24.7594	16.7898	20.9937	15.515	13.1637	32.1879
802.55	22.47	30.7649	23.4322	23.0322	24.7686	16.7869	20.997	15.4883	13.1834	32.2861
803	22.5117	30.7625	23.4165	23.14	24.8174	16.8003	21.032	15.4167	13.1594	32.3311
803.45	22.485	30.7745	23.407	23.304	24.8675	16.822	21.0299	15.3908	13.1634	32.2398
803.9	22.4556	30.783	23.4083	23.3611	24.9267	16.7997	21.0258	15.3424	13.1928	32.2
804.35	22.4059	30.8179	23.404	23.4301	24.9679	16.8189	21.0395	15.392	13.18	32.1465
804.8	22.39	30.8011	23.372	23.5477	24.9705	16.8443	21.0445	15.4619	13.163	32.1048
805.25	22.4312	30.7844	23.3516	23.6054	24.9686	16.8435	21.065	15.4789	13.1362	32.1191
805.7	22.4888	30.7918	23.368	23.6631	24.9146	16.8449	21.071	15.5442	13.0815	32.073
806.15	22.5239	30.8024	23.4594	23.6902	24.8419	16.8199	21.0447	15.539	13.0639	32.0182
806.6	22.542	30.8416	23.5347	23.6384	24.7686	16.7773	20.99	15.5396	13.1007	31.98
807.05	22.5522	30.8951	23.6207	23.6044	24.7012	16.7324	20.9547	15.5573	13.1248	31.9586
807.5	22.5587	30.9401	23.6445	23.5334	24.6793	16.7118	20.9317	15.5642	13.1511	31.9832
807.95	22.5899	30.9716	23.6155	23.4964	24.669	16.6819	20.9253	15.6002	13.209	32.0307
808.4	22.6429	31.0156	23.5954	23.4959	24.7894	16.6481	20.9492	15.6109	13.2375	32.025
808.85	22.687	31.0261	23.533	23.5006	24.9087	16.6422	20.9668	15.6078	13.2935	32.0337
809.3	22.7116	31.0281	23.5375	23.5279	25.0036	16.6975	20.9863	15.5519	13.3633	32.0206
809.75	22.7258	31.029	23.5496	23.5707	25.1302	16.7454	21.0091	15.4843	13.3555	32.0155
810.2	22.7378	30.9975	23.5671	23.6259	25.1461	16.8212	20.9366	15.4437	13.3241	32.0842
810.65	22.7338	31.0242	23.6072	23.6605	25.1772	16.8967	20.8434	15.4726	13.2612	32.1351
811.1	22.747	31.0625	23.5792	23.6307	25.2493	16.7824	20.7521	15.5304	13.2027	32.2087
811.55	22.7491	31.0711	23.588	23.541	25.2849	16.7075	20.6795	15.6096	13.1802	32.2659
812	22.6921	31.1084	23.5914	23.4256	25.3416	16.6143	20.787	15.6727	13.1744	32.296
812.45	22.6743	31.1084	23.5487	23.3354	25.3671	16.5159	20.9267	15.673	13.1491	32.3084
812.9	22.6464	31.0883	23.5552	23.3658	25.3296	16.6373	21.0702	15.6585	13.081	32.2936
813.35	22.6487	31.1371	23.5252	23.4365	25.3493	16.7336	21.1859	15.6362	13.0176	32.2749
813.8	22.7196	31.1763	23.5273	23.531	25.3506	16.8338	21.1876	15.6366	12.9968	32.265
814.25	22.7621	31.1753	23.647	23.6322	25.3555	16.9192	21.1998	15.619	13.0277	32.2836
814.7	22.8104	31.2126	23.7339	23.6807	25.4218	16.9124	21.2741	15.6541	13.0901	32.2954
815.15	22.8212	31.1887	23.8213	23.7235	25.393	16.9048	21.3553	15.6573	13.1659	32.3523
815.6	22.8026	31.1667	23.9235	23.7564	25.3787	16.9022	21.4942	15.6233	13.1726	32.3814
816.05	22.7733	31.2069	23.9418	23.7566	25.3939	16.9981	21.5661	15.631	13.1604	32.4067
816.5	22.753	31.1772	23.9522	23.75	25.3421	17.1053	21.5028	15.6199	13.1439	32.4505
816.95	22.7797	31.1897	23.9512	23.7163	25.3697	17.2228	21.4544	15.6487	13.1175	32.4052
817.4	22.828	31.2174	23.8628	23.6802	25.4018	17.3454	21.3442	15.7293	13.1162	32.3981
817.85	22.9224	31.204	23.8001	23.6751	25.4181	17.2958	21.2816	15.8176	13.1053	32.3672
818.3	23.0083	31.2279	23.7864	23.6864	25.456	17.2294	21.2901	15.8717	13.1259	32.3392
818.75	23.0445	31.2452	23.8263	23.7018	25.4368	17.1391	21.2915	15.922	13.1298	32.3995
819.2	23.0297	31.2499	23.9215	23.6996	25.4072	17.0209	21.3338	15.9253	13.1753	32.4226
819.65	22.9678	31.2882	23.9758	23.6765	25.4197	17.0005	21.3806	15.8807	13.2425	32.4935
820.1	22.8877	31.3092	24.0382	23.6336	25.4736	17.0172	21.4193	15.8551	13.2721	32.5445
820.55	22.8527	31.3083	24.0284	23.631	25.5392	17.0701	21.4305	15.8082	13.3083	32.5444
821	22.8618	31.2834	24.006	23.6821	25.6013	17.1335	21.4088	15.7824	13.2356	32.5816
821.45	22.8921	31.2633	24.0272	23.7619	25.5777	17.1503	21.3631	15.7787	13.1343	32.5651
821.9	22.94	31.3293	23.9493	23.8573	25.6265	17.1298	21.317	15.7775	13.0661	32.5764
822.35	22.9646	31.3876	23.9336	23.9508	25.7069	17.0765	21.3176	15.7952	13.0108	32.6028
822.8	22.9832	31.4909	23.9246	24.0301	25.8165	17.0477	21.3164	15.8209	13.0946	32.5863
823.25	22.9931	31.5483	23.8985	24.0793	25.9382	17.0531	21.3448	15.8611	13.1778	32.6145
823.7	23.0241	31.511	23.9622	24.1646	25.8987	17.075	21.3871	15.8906	13.2222	32.6117
824.15	23.0587	31.4947	23.9959	24.2184	25.8203	17.0862	21.412	15.8988	13.2768	32.6106
824.6	23.0847	31.4507	24.0437	24.2672	25.6904	17.0859	21.4827	15.87	13.2847	32.6351
825.05	23.1047	31.4345	24.1071	24.3198	25.5822	17.1008	21.5185	15.8165	13.3381	32.6141
825.5	23.1358	31.4431	24.1082	24.3097	25.5136	17.037	21.5141	15.7636	13.4256	32.6036
825.95	23.1499	31.4765	24.1143	24.2466	25.4996	17.004	21.4848	15.714	13.5225	32.5767
826.4	23.1577	31.5291	24.0796	24.1396	25.4912	16.9391	21.3796	15.698	13.5705	32.5265
826.85	23.1799	31.5837	24.0356	24.0304	25.503	16.8525	21.3055	15.734	13.5839	32.5236
827.3	23.0592	31.6917	23.9066	23.9047	25.5307	16.8904	21.2855	15.7887	13.5823	32.4377
827.75	22.9452	31.7606	23.7679	23.9029	25.5257	16.9494	21.289	15.88	13.5227	32.3556
828.2	22.8476	31.8141	23.6634	23.9225	25.5825	17.0466	21.3774	15.9786	13.473	32.2994
828.65	22.7485	31.8868	23.5387	23.9826	25.6027	17.1299	21.4602	16.0273	13.3951	32.1909
829.1	22.8045	31.8887	23.668	24.0801	25.6506	17.1398	21.4972	16.071	13.2924	32.3062
829.55	22.8684	31.9002	23.8058	24.132	25.6711	17.0867	21.5315	16.1028	13.2284	32.4493
830	22.9383	31.8964	23.9187	24.2101	25.6731	17.064	21.5313	16.1112	13.2336	32.5919
830.45	22.9993	31.8725	24.1313	24.2438	25.7268	17.0753	21.5559	16.1232	13.2813	32.7727
830.9	22.9753	31.861	24.193	24.3055	25.7697	17.1327	21.6248	16.126	13.428	32.7867
831.35	22.9435	31.7529	24.2478	24.3409	25.842	17.2271	21.6831	16.1012	13.5704	32.7797
831.8	22.9116	31.6602	24.3046	24.3493	25.8807	17.237	21.7217	16.0842	13.6432	32.7659
832.25	22.8899	31.5349	24.205	24.3719	25.8958	17.2432	21.7078	16.072	13.7384	32.7572
832.7	22.9585	31.4096	24.1459	24.3458	25.8936	17.2099	21.6676	16.159	13.695	32.7992
833.15	23.0339	31.4661	24.1221	24.2713	25.8732	17.2054	21.6362	16.2717	13.6453	32.8201
833.6	23.1027	31.5263	24.1523	24.2099	25.8696	17.2332	21.6344	16.3661	13.6098	32.8603
834.05	23.1788	31.642	24.2382	24.1514	25.8526	17.2356	21.6411	16.469	13.5008	32.85
834.5	23.1962	31.7787	24.3263	24.1053	25.8515	17.2511	21.6611	16.357	13.4299	32.8149
834.95	23.238	31.8447	24.3755	24.1793	25.8495	17.2369	21.6541	16.201	13.3501	32.8286
835.4	23.2806	31.9059	24.3708	24.2461	25.8273	17.2417	21.6455	16.0617	13.312	32.8213
835.85	23.3097	31.926	24.4081	24.2824	25.8258	17.2475	21.627	15.9023	13.2579	32.8305
836.3	23.3423	31.9136	24.3963	24.4145	25.8005	17.2845	21.5929	15.8774	13.2484	32.835
836.75	23.3303	31.8495	24.4015	24.5076	25.7458	17.2844	21.6115	15.873	13.2516	32.8204
837.2	23.2954	31.7826	24.3984	24.6026	25.7108	17.2748	21.5968	15.8625	13.2027	32.8287
837.65	23.2708	31.7539	24.364	24.7243	25.6382	17.306	21.6369	15.9024	13.2887	32.8928
838.1	23.2731	31.8026	24.3211	24.676	25.5977	17.2879	21.6802	15.9604	13.3643	32.9741
838.55	23.2975	31.9509	24.2516	24.5805	25.7238	17.337	21.6945	16.0255	13.4293	33.0401
839	23.3189	32.1067	24.2167	24.5257	25.847	17.3503	21.6731	16.136	13.5133	33.0974
839.45	23.313	32.2358	24.1964	24.491	26.0243	17.3106	21.5968	16.2177	13.5115	33.1519
839.9	23.2796	32.2779	24.241	24.5485	26.1805	17.265	21.519	16.2318	13.5023	33.2208
840.35	23.2643	32.2339	24.3423	24.6388	26.1854	17.1563	21.4366	16.2548	13.5556	33.3116
840.8	23.2958	32.1995	24.4251	24.6482	26.1931	17.1135	21.4831	16.1934	13.6303	33.3413
841.25	23.3532	32.1708	24.4742	24.6351	26.177	17.1188	21.5582	16.12	13.7078	33.3432
841.7	23.4293	32.1498	24.4887	24.6125	26.1536	17.1759	21.627	16.0821	13.7844	33.3126
842.15	23.4936	32.1679	24.4614	24.5848	26.1751	17.2596	21.7173	16.0335	13.7942	33.2696
842.6	23.5374	32.1766	24.4472	24.6484	26.2094	17.303	21.7454	16.0502	13.7571	33.2724
843.05	23.567	32.1727	24.4717	24.6885	26.2278	17.3267	21.7736	16.08	13.7502	33.2562
843.5	23.5722	32.2272	24.4905	24.7328	26.2299	17.3104	21.9384	16.1143	13.7479	33.2457
843.95	23.5523	32.2817	24.4963	24.831	26.2188	17.3326	22.0991	16.183	13.7568	33.2198
844.4	23.5068	32.3123	24.5005	24.8609	26.2032	17.3761	22.2544	16.2525	13.7909	33.216
844.85	23.4712	32.3659	24.5136	24.9456	26.1912	17.4193	22.381	16.3007	13.7801	33.2457
845.3	23.4347	32.3688	24.5468	25.0112	26.2557	17.4686	22.2742	16.3418	13.7062	33.303
845.75	23.4051	32.3315	24.6061	24.972	26.3139	17.4977	22.1398	16.3613	13.6322	33.3757
846.2	23.3956	32.3391	24.6364	24.9482	26.3525	17.5207	21.9993	16.3522	13.5661	33.4178
846.65	23.3737	32.3209	24.652	24.9038	26.4135	17.5204	21.885	16.4006	13.5252	33.4264
847.1	23.3975	32.3162	24.6572	24.8369	26.4203	17.5185	21.8874	16.4512	13.581	33.413
847.55	23.4498	32.3592	24.6673	24.7904	26.425	17.4929	21.8482	16.4913	13.6394	33.4073
848	23.522	32.3917	24.7102	24.7542	26.4362	17.431	21.8074	16.5467	13.7252	33.4178
848.45	23.6071	32.4424	24.7593	24.6976	26.4254	17.4021	21.7664	16.5345	13.8145	33.4398
848.9	23.6585	32.5265	24.802	24.7137	26.4405	17.3863	21.6932	16.5284	13.8652	33.4608
849.35	23.6719	32.5514	24.8159	24.8073	26.4756	17.3869	21.7665	16.4924	13.9073	33.4809
849.8	23.6747	32.5428	24.8406	24.8911	26.5603	17.437	21.8599	16.438	13.9138	33.4962
850.25	23.6735	32.5418	24.8149	24.9908	26.6599	17.4757	21.9385	16.3947	13.896	33.5086
850.7	23.6544	32.4826	24.809	25.0509	26.7393	17.5156	22.0669	16.3566	13.8865	33.5077
851.15	23.6856	32.4979	24.8074	24.9201	26.799	17.5135	22.1044	16.3717	13.911	33.4732
851.6	23.6961	32.5237	24.7744	24.8348	26.7511	17.5	22.1216	16.3859	13.9035	33.457
852.05	23.6916	32.56	24.799	24.7322	26.6783	17.4827	22.2327	16.4135	13.9313	33.4513
852.5	23.7404	32.6375	24.7862	24.6712	26.6195	17.4835	22.3321	16.4341	13.9498	33.478
852.95	23.7614	32.692	24.7902	24.8994	26.5685	17.5372	22.4307	16.4302	13.9478	33.5861
853.4	23.7729	32.7752	24.8174	25.0963	26.5671	17.6012	22.5385	16.4734	13.9784	33.6616
853.85	23.8126	32.8115	24.8335	25.3048	26.5702	17.6804	22.5049	16.5188	13.9909	33.7295
854.3	23.7998	32.8612	24.887	25.4513	26.5536	17.7736	22.4346	16.5292	14.0172	33.7687
854.75	23.7829	32.9033	24.9594	25.4387	26.5287	17.8704	22.3622	16.5794	14.0032	33.7027
855.2	23.7848	32.9483	25.0125	25.3913	26.5194	17.8975	22.2753	16.5805	13.9828	33.6836
855.65	23.7857	33.0257	25.0364	25.3648	26.5249	17.9158	22.2333	16.5943	13.943	33.6693
856.1	23.7904	33.0554	25.0173	25.3658	26.5343	17.8114	22.1091	16.5683	13.9781	33.6616
856.55	23.7781	33.0544	24.9879	25.3979	26.5501	17.6847	21.9945	16.4831	14.0815	33.7247
857	23.7537	33.0267	24.9741	25.4451	26.5839	17.6365	21.9055	16.4027	14.2039	33.7429
857.45	23.7113	32.9779	24.9949	25.4686	26.614	17.577	21.8363	16.3076	14.3533	33.7706
857.9	23.7173	32.9616	25.0541	25.4703	26.6367	17.6226	21.989	16.3714	14.3226	33.8318
858.35	23.7477	33.0047	25.0762	25.4202	26.6846	17.6522	22.1506	16.436	14.2533	33.8624
858.8	23.8157	33.0362	25.0736	25.4278	26.6998	17.6605	22.2779	16.5492	14.1813	33.9064
859.25	23.8894	33.1089	25.0359	25.4554	26.717	17.6636	22.4352	16.6329	14.1426	33.9351
859.7	23.9177	33.1739	25.0118	25.5369	26.7169	17.6576	22.4532	16.6259	14.184	33.9466
860.15	23.9294	33.1883	25.0323	25.6454	26.6679	17.6712	22.4724	16.6606	14.2474	33.9954
860.6	23.9151	33.2218	25.0735	25.6497	26.6354	17.6886	22.6527	16.6441	14.2582	34.0307
861.05	23.8929	33.2198	25.1439	25.6139	26.6183	17.6876	22.7633	16.6906	14.1668	34.0862
861.5	23.8739	33.1883	25.1902	25.4926	26.6685	17.657	22.9237	16.7416	14.113	34.1225
861.95	23.8805	33.1826	25.2079	25.3774	26.7508	17.6353	23.0627	16.7809	14.0474	34.1092
862.4	23.8768	33.2131	25.2609	25.3499	26.8165	17.5884	22.9198	16.8079	14.0637	34.0996
862.85	23.893	33.2409	25.3202	25.3771	26.8867	17.616	22.811	16.7873	14.1675	34.0604
863.3	23.9125	33.3394	25.4155	25.463	26.9256	17.6555	22.6552	16.7671	14.208	34.0279
863.75	23.9258	33.4006	25.5427	25.5787	26.996	17.6988	22.5117	16.7478	14.2028	34.0221
864.2	23.9602	33.3853	25.582	25.652	27.0977	17.766	22.5339	16.7635	14.0983	34.0499
864.65	23.9917	33.4159	25.6153	25.6823	27.1414	17.7839	22.5505	16.8055	13.9636	34.091
865.1	24.0356	33.3652	25.5548	25.7513	27.2734	17.8184	22.6002	16.8336	13.8747	34.1388
865.55	24.0767	33.3633	25.4579	25.8079	27.3488	17.7265	22.6328	16.7155	13.8603	34.2067
866	24.1179	33.3891	25.4378	25.8062	27.4017	17.6331	22.6298	16.6007	13.9574	34.2364
866.45	24.1407	33.3786	25.4117	25.8245	27.5077	17.531	22.6569	16.4653	14.0614	34.245
866.9	24.156	33.4274	25.462	25.7931	27.4297	17.4405	22.6563	16.3496	14.163	34.2536
867.35	24.1052	33.4293	25.5055	25.7317	27.3577	17.5445	22.6677	16.4881	14.2538	34.2478
867.8	24.0389	33.4608	25.5072	25.7954	27.2936	17.6554	22.6753	16.6015	14.2974	34.2631
868.25	23.9871	33.4847	25.4868	25.8395	27.2243	17.8091	22.6362	16.721	14.3164	34.2899
868.7	23.9434	33.4551	25.422	25.8702	27.2244	17.9149	22.6105	16.8165	14.2368	34.3119
869.15	24.0181	33.4895	25.4066	25.9229	27.2652	17.9336	22.715	16.8162	14.1158	34.3205
869.6	24.0985	33.5163	25.4053	25.9442	27.2974	17.9228	22.8321	16.8467	14.0023	34.3492
870.05	24.165	33.5536	25.4423	26.0003	27.3181	17.8802	22.9792	16.9003	13.92	34.4477
870.5	24.2116	33.6597	25.5221	26.0525	27.368	17.8718	23.1317	16.9578	14.0259	34.5395
870.95	24.164	33.7152	25.695	26.0814	27.3786	17.8759	23.0411	16.996	14.1502	34.6246
871.4	24.1224	33.7123	25.8819	26.0958	27.2864	17.89	22.9767	16.9921	14.2301	34.6906
871.85	24.1124	33.6999	26.0406	26.0734	27.1801	17.9197	22.915	16.9506	14.3042	34.6676
872.3	24.1197	33.6435	26.209	26.0918	27.0756	17.9262	22.8318	16.9342	14.2748	34.7068
872.75	24.083	33.6272	26.133	26.132	26.9739	17.9347	22.8567	16.9027	14.2494	34.77
873.2	24.0509	33.7238	26.0579	26.1576	27.11	17.9677	22.8597	16.9158	14.2669	34.8044
873.65	23.9865	33.8213	25.993	26.2481	27.2645	17.9694	22.8512	16.9535	14.2844	34.8761
874.1	23.9155	33.9418	25.8186	26.3397	27.4075	18.0068	22.8884	17.0135	14.3128	34.834
874.55	24.1013	34.0078	25.7558	26.4221	27.5612	18.0501	22.9378	17.1007	14.3372	34.7489
875	24.255	33.9829	25.6593	26.5146	27.5743	18.0898	22.9815	17.0535	14.3595	34.6829
875.45	24.3952	33.9973	25.5764	26.4909	27.5885	18.1427	23.0301	17.0064	14.3671	34.6169
875.9	24.5451	33.9657	25.6461	26.4394	27.5928	18.1874	23.0353	16.9234	14.3655	34.6227
876.35	24.4629	33.9514	25.7209	26.416	27.5829	18.209	23.071	16.847	14.366	34.66
876.8	24.4115	33.9389	25.8106	26.3713	27.567	18.2338	23.1056	16.9779	14.3509	34.6915
877.25	24.3956	33.8701	25.8916	26.4105	27.5688	18.296	23.1282	17.1161	14.3666	34.7097
877.7	24.377	33.85	25.9026	26.4613	27.5869	18.3225	23.1612	17.2149	14.382	34.7068
878.15	24.423	33.8691	25.9491	26.4562	27.7628	18.3502	23.1016	17.2675	14.4081	34.7394
878.6	24.4803	33.9504	25.9865	26.4754	27.9518	18.3052	23.0532	17.2369	14.5602	34.8627
879.05	24.5379	34.09	26.0072	26.4922	28.1251	18.1923	23.025	17.1763	14.6519	35.0004
879.5	24.5675	34.2115	26.0405	26.4912	28.2932	18.1033	23.0054	17.1659	14.7669	35.1563
879.95	24.6131	34.3071	26.0433	26.5569	28.1918	18.0159	23.0813	17.2383	14.8647	35.2729
880.4	24.6262	34.3272	26.0774	26.6629	28.0948	18.0117	23.1573	17.3125	14.7382	35.2443
880.85	24.6266	34.266	26.1107	26.6189	27.9662	18.0767	23.1596	17.4045	14.6687	35.2529
881.3	24.6608	34.2182	26.1626	26.579	27.8493	18.1351	23.1754	17.5052	14.5927	35.2768
881.75	24.6774	34.1694	26.1925	26.4821	27.8739	18.1708	23.1631	17.4716	14.5149	35.3112
882.2	24.7107	34.1809	26.1967	26.3104	27.9219	18.168	23.1413	17.4161	14.5578	35.3801
882.65	24.7387	34.2669	26.2337	26.405	27.987	18.1302	23.2419	17.3641	14.5695	35.3361
883.1	24.7751	34.3435	26.1821	26.5365	28.0327	18.1122	23.3244	17.2929	14.5784	35.2414
883.55	24.7921	34.4353	26.1715	26.6956	28.0608	18.1374	23.3745	17.3484	14.6684	35.0941
884	24.8442	34.5223	26.1953	26.9131	28.0468	18.1872	23.4173	17.3991	14.7336	34.9956
884.45	24.8977	34.573	26.2077	27.0031	27.9436	18.2317	23.3833	17.444	14.8029	34.9889
884.9	24.918	34.6036	26.2784	27.063	27.8092	18.2628	23.2404	17.4912	14.8522	35.0253
885.35	24.9397	34.6007	26.334	27.1289	27.6584	18.2942	23.1164	17.49	14.7804	35.1142
885.8	24.8807	34.5883	26.3318	27.1474	27.5184	18.2869	23.0076	17.5111	14.7184	35.1945
886.25	24.8419	34.6112	26.3148	27.1715	27.603	18.2276	22.905	17.5683	14.7103	35.2414
886.7	24.8128	34.6428	26.3264	27.1811	27.744	18.1554	23.0276	17.6328	14.7109	35.2969
887.15	24.809	34.6877	26.3292	27.1673	27.9024	18.0719	23.1849	17.6787	14.7559	35.4097
887.6	24.8527	34.7145	26.3704	27.1567	28.0814	18.0348	23.3543	17.7376	14.8042	35.5101
888.05	24.8679	34.7298	26.4366	27.1472	28.1398	18.1018	23.5859	17.7096	14.7831	35.6268
888.5	24.9111	34.7776	26.4584	27.2533	28.1967	18.1838	23.6886	17.6496	14.7964	35.6755
888.95	24.9024	34.8388	26.4971	27.4021	28.2639	18.2335	23.7725	17.6072	14.8309	35.6392
889.4	24.8827	34.8751	26.5518	27.5895	28.3094	18.2738	23.7882	17.5134	14.862	35.6813
889.85	24.9037	34.8876	26.5617	27.7456	28.3324	18.2865	23.7274	17.4746	14.9157	35.7214
890.3	24.8977	34.8771	26.5963	27.6864	28.3295	18.3115	23.7086	17.4573	14.9158	35.8209
890.75	24.9534	34.8551	26.6236	27.5584	28.3002	18.3975	23.6487	17.4377	14.8922	35.9261
891.2	25.0298	34.8818	26.634	27.4078	28.3323	18.5385	23.6761	17.4264	14.8775	35.906
891.65	25.0441	34.9182	26.671	27.2339	28.3949	18.682	23.7411	17.4299	14.8883	35.8926
892.1	25.0516	34.9344	26.6427	27.2006	28.4901	18.8046	23.7352	17.437	14.9435	35.8553
892.55	25.0255	34.9564	26.616	27.2362	28.6074	18.8886	23.7263	17.4638	15.0132	35.8046
893	24.9759	34.9889	26.5773	27.2959	28.614	18.8301	23.709	17.5407	15.0708	35.7903
893.45	24.9566	35.053	26.5389	27.4584	28.5883	18.7373	23.6616	17.5846	15.1181	35.7788
893.9	24.9477	35.1486	26.5892	27.5972	28.5417	18.6671	23.691	17.6425	15.1107	35.7606
894.35	24.9481	35.251	26.622	27.6976	28.4968	18.6063	23.7727	17.6621	15.1024	35.8008
894.8	24.9576	35.3294	26.6484	27.7305	28.5187	18.6265	23.812	17.6603	15.069	35.8697
895.25	24.9927	35.3495	26.675	27.7081	28.5743	18.6586	23.876	17.684	14.9906	35.9022
895.7	25.0336	35.3552	26.6759	27.661	28.6031	18.6032	23.9085	17.7256	14.9347	36.036
896.15	25.065	35.3514	26.6817	27.5985	28.6367	18.5392	23.9242	17.8146	14.8681	36.1374
896.6	25.1121	35.3456	26.7098	27.5929	28.6507	18.4733	23.9409	17.9108	14.8517	36.1967
897.05	25.138	35.3868	26.7439	27.5959	28.6545	18.4043	23.9517	17.9643	14.8851	36.2742
897.5	25.1503	35.4317	26.7746	27.6502	28.6882	18.4885	23.9258	17.9586	14.9438	36.191
897.95	25.1675	35.4642	26.8282	27.7559	28.7064	18.5582	23.9078	17.9211	14.9927	36.1422
898.4	25.1582	35.5111	26.8195	27.8755	28.7714	18.5901	23.9162	17.8629	15.061	36.1202
898.85	25.164	35.5158	26.828	28.0544	28.8353	18.6207	23.9275	17.8564	15.1056	36.1183
899.3	25.1771	35.5455	26.7639	28.1895	28.8908	18.5254	23.9884	17.8504	15.189	36.235
899.75	25.2086	35.5981	26.6975	28.3001	28.9233	18.4978	24.0874	17.8625	15.2904	36.2876
900.2	25.2387	35.6344	26.7456	28.3404	28.9003	18.5207	24.1736	17.8758	15.3043	36.3488
900.65	25.2157	35.6899	26.752	28.2368	28.8714	18.5662	24.2549	17.9266	15.3143	36.3698
901.1	25.2262	35.7023	26.911	28.1699	28.8454	18.6637	24.3418	18.0094	15.2241	36.3258
901.55	25.2213	35.7061	27.0506	28.1035	28.8719	18.6918	24.3352	18.0719	15.1274	36.3095
902	25.2461	35.6994	27.1132	28.1092	28.9314	18.7291	24.334	18.1525	15.1004	36.2627
902.45	25.3265	35.7319	27.2566	28.1899	28.9911	18.7493	24.3395	18.1314	15.0857	36.2302
902.9	25.3547	35.7836	27.3004	28.2407	29.0613	18.7709	24.328	18.1189	15.1253	36.2187
903.35	25.3813	35.8171	27.3586	28.2792	29.0897	18.8162	24.3504	18.1253	15.1603	36.234
903.8	25.3972	35.8716	27.4379	28.2699	29.095	18.8219	24.3793	18.1109	15.1647	36.299
904.25	25.4246	35.8821	27.4023	28.2855	29.0868	18.8151	24.3936	18.1514	15.1912	36.4558
904.7	25.46	35.8926	27.4103	28.3296	29.0981	18.8191	24.387	18.1548	15.2157	36.6098
905.15	25.5081	35.9232	27.4024	28.419	29.1367	18.8037	24.3993	18.0314	15.2907	36.7485
905.6	25.5416	35.9787	27.4063	28.53	29.157	18.7874	24.3907	17.912	15.3437	36.868
906.05	25.5399	36.036	27.47	28.5953	29.2392	18.8052	24.4067	17.801	15.3615	36.8211
906.5	25.5462	36.08	27.5088	28.684	29.2638	18.7847	24.4552	17.7076	15.3706	36.8766
906.95	25.5612	36.1259	27.5454	28.7445	29.3074	18.7869	24.5039	17.857	15.3232	36.9445
907.4	25.573	36.103	27.5622	28.8213	29.3852	18.8062	24.5259	18.0211	15.3609	37.0124
907.85	25.5802	36.0925	27.5509	28.9231	29.3973	18.8263	24.5563	18.1631	15.4219	37.1864
908.3	25.6157	36.1068	27.5164	28.9301	29.4599	18.8522	24.568	18.3336	15.5024	37.1501
908.75	25.5851	36.1288	27.5017	28.8986	29.47	18.8899	24.5676	18.333	15.5839	37.0784
909.2	25.5941	36.2292	27.5047	28.8447	29.4842	18.9424	24.6604	18.3159	15.5961	37.0048
909.65	25.62	36.3153	27.5362	28.7781	29.53	18.9584	24.7	18.2773	15.5884	36.9493
910.1	25.6267	36.4186	27.5948	28.7808	29.5458	19.005	24.7574	18.3062	15.5542	36.9961
910.55	25.7158	36.519	27.6594	28.8281	29.5011	19.0265	24.8081	18.4053	15.5493	37.0487
911	25.7694	36.5926	27.6984	28.8667	29.4461	19.0468	24.7938	18.5489	15.5653	37.0841
911.45	25.8211	36.7054	27.7423	28.9235	29.3674	19.1125	24.7622	18.7404	15.5996	37.064
911.9	25.8479	36.7418	27.8106	28.9759	29.2884	19.1645	24.6894	18.7615	15.6535	37.0975
912.35	25.8338	36.7676	27.8439	29.0128	29.3958	19.2173	24.6531	18.7656	15.6847	37.1463
912.8	25.8142	36.7628	27.8644	29.0854	29.519	19.2402	24.6275	18.7209	15.7408	37.2323
913.25	25.7883	36.7351	27.8796	29.1561	29.6668	19.2138	24.7078	18.6583	15.7891	37.328
913.7	25.7895	36.781	27.8959	29.2609	29.8336	19.1821	24.8334	18.6519	15.8086	37.3748
914.15	25.8017	36.8307	27.8132	29.3838	29.904	19.1669	24.9419	18.6341	15.8386	37.415
914.6	25.8379	36.8785	27.7749	29.473	29.976	19.1606	25.0738	18.6319	15.7753	37.3872
915.05	25.8853	36.9082	27.7076	29.5681	30.0431	19.1683	25.1445	18.6161	15.7084	37.459
915.5	25.9192	36.8919	27.585	29.5722	30.0932	19.1874	25.182	18.6294	15.6979	37.5422
915.95	25.9529	36.8699	27.7147	29.552	30.0922	19.1817	25.1845	18.6433	15.6992	37.6234
916.4	25.978	36.8757	27.8446	29.5692	30.0684	19.1875	25.1066	18.6259	15.7835	37.7458
916.85	25.9928	36.9005	28.0133	29.591	29.9956	19.1961	25.051	18.6024	15.8673	37.6913
917.3	26.0206	36.9627	28.2558	29.6268	30.0224	19.1946	25.0314	18.6008	15.8895	37.6225
917.75	26.0502	37.0344	28.3707	29.6526	30.1554	19.1993	25.068	18.6197	15.9104	37.589
918.2	26.0903	37.1185	28.463	29.6278	30.2634	19.2626	25.2096	18.6946	15.9268	37.5594
918.65	26.1301	37.2094	28.5133	29.5421	30.4697	19.3406	25.313	18.8235	15.9475	37.6148
919.1	26.1627	37.2955	28.4743	29.5385	30.5102	19.3927	25.4369	18.9044	16.0086	37.6627
919.55	26.2127	37.3853	28.4374	29.578	30.4534	19.4693	25.5137	18.9308	16.0445	37.6722
920	26.2347	37.4513	28.3992	29.6503	30.4423	19.4325	25.5361	18.9224	16.0603	37.6952
920.45	26.2814	37.459	28.433	29.7884	30.3652	19.3711	25.5604	18.8809	16.0775	37.7057
920.9	26.3282	37.458	28.5088	29.8742	30.354	19.359	25.5039	18.8562	16.0836	37.7468
921.35	26.337	37.4599	28.5806	29.9234	30.36	19.3382	25.4585	18.8926	16.0808	37.8185
921.8	26.3678	37.4685	28.7235	29.9465	30.3309	19.363	25.4325	18.9244	16.071	37.8663
922.25	26.3729	37.5833	28.7898	29.9464	30.3248	19.4127	25.4525	18.9587	16.0467	37.9438
922.7	26.3704	37.678	28.8564	29.9474	30.3266	19.4492	25.4975	18.9858	16.0173	38.0117
923.15	26.3909	37.7506	28.9346	29.9361	30.3646	19.4954	25.573	19.0085	16.0026	38.0452
923.6	26.4002	37.8501	28.8602	29.9269	30.4475	19.557	25.6186	19.0525	16.0038	38.179
924.05	26.4284	37.8778	28.8237	29.9128	30.4997	19.6218	25.6457	19.0774	16.0415	38.3062
924.5	26.479	37.9486	28.7796	29.888	30.5595	19.6812	25.6953	19.1279	16.0742	38.421
924.95	26.5244	38.0232	28.7043	29.9026	30.5953	19.7163	25.7151	19.1407	16.1147	38.5501
925.4	26.5789	38.0241	28.736	29.9559	30.643	19.7442	25.7712	19.1295	16.1486	38.508
925.85	26.6942	38.0079	28.7686	30.0331	30.7159	19.7565	25.7897	19.1057	16.1476	38.443
926.3	26.7775	37.9486	28.8053	30.1091	30.7523	19.7609	25.8727	19.0445	16.1588	38.3799
926.75	26.8548	37.8989	28.8499	30.1613	30.8087	19.7591	25.9503	19.0236	16.1718	38.3158
927.2	26.948	37.9256	28.8805	30.1844	30.828	19.7355	25.9775	18.9835	16.2061	38.3263
927.65	26.8106	37.9868	28.9001	30.1994	30.8574	19.6318	26.0411	18.9944	16.251	38.3751
928.1	26.6975	38.0566	28.8915	30.2272	30.9925	19.5144	25.9864	19.0457	16.2658	38.4344
928.55	26.6083	38.1379	28.9198	30.3343	31.1103	19.4252	25.957	19.0915	16.2925	38.5042
929	26.5035	38.1714	28.8531	30.4512	31.2133	19.3503	25.9868	19.1839	16.2813	38.5654
929.45	26.5994	38.2173	28.7966	30.5335	31.3163	19.4393	26.0217	19.2482	16.2642	38.5644
929.9	26.6847	38.2814	28.8216	30.6523	31.2821	19.5601	26.0834	19.293	16.3024	38.5969
930.35	26.7372	38.3034	28.817	30.6967	31.2903	19.6584	26.131	19.2931	16.3116	38.6084
930.8	26.7767	38.4172	28.9777	30.7418	31.2886	19.7698	26.1526	19.3141	16.3555	38.6553
931.25	26.7633	38.53	29.1504	30.8387	31.2395	19.8011	26.1496	19.3089	16.4174	38.7786
931.7	26.7842	38.6352	29.269	30.9016	31.2864	19.8326	26.1924	19.3436	16.4631	38.8484
932.15	26.8228	38.7767	29.4179	30.9324	31.2655	19.8895	26.2372	19.4054	16.5374	39.011
932.6	26.8707	38.7872	29.4842	30.9358	31.3048	19.984	26.2835	19.4393	16.6079	39.1344
933.05	26.9247	38.7901	29.523	30.9145	31.3841	20.0827	26.3508	19.5095	16.7378	39.2453
933.5	26.9394	38.7758	29.5609	30.8857	31.4162	20.1623	26.3893	19.5059	16.8626	39.3744
933.95	26.9415	38.749	29.525	30.8948	31.5035	20.2235	26.3896	19.5324	16.975	39.3648
934.4	26.9505	38.7652	29.487	30.9398	31.5466	20.1903	26.3799	19.5496	17.0705	39.383
934.85	26.981	38.7318	29.4521	30.9612	31.5365	20.1313	26.3801	19.5554	16.9945	39.339
935.3	27.0138	38.7337	29.4031	30.9831	31.521	20.0636	26.3994	19.5892	16.9034	39.3046
935.75	27.0768	38.7624	29.3957	31.0129	31.4699	20.02	26.5069	19.6015	16.791	39.2893
936.2	27.1171	38.7786	29.4342	30.9919	31.4446	20.0448	26.6079	19.6144	16.6816	39.2587
936.65	27.1334	38.8637	29.6197	30.9938	31.5139	20.1229	26.6813	19.6214	16.6816	39.2549
937.1	27.1871	38.9402	29.8632	31.0073	31.6036	20.1078	26.7088	19.6353	16.6778	39.2252
937.55	27.2113	38.9967	30.144	31.0167	31.6971	20.0406	26.6775	19.6378	16.7166	39.2721
938	27.2543	39.1124	30.3668	31.105	31.7587	19.9421	26.6959	19.6463	16.7107	39.3447
938.45	27.32	39.2051	30.3217	31.1798	31.7758	19.7811	26.7174	19.6902	16.7109	39.4576
938.9	27.3518	39.2606	30.2328	31.2657	31.789	19.8375	26.792	19.751	16.7248	39.5656
939.35	27.3721	39.2931	30.1127	31.3317	31.8189	19.9566	26.8791	19.7019	16.6893	39.6268
939.8	27.3789	39.2816	29.9918	31.3382	31.8648	20.0946	26.8809	19.6613	16.7621	39.6823
940.25	27.3618	39.252	30.0169	31.2944	31.8925	20.2751	26.8912	19.5862	16.8118	39.6603
940.7	27.343	39.2587	30.0242	31.2034	31.9428	20.3687	26.8541	19.4946	16.857	39.6039
941.15	27.3602	39.2902	30.0254	31.1334	32.0253	20.412	26.8446	19.603	16.9423	39.5551
941.6	27.3956	39.3371	30.1004	31.127	32.1208	20.4481	26.907	19.7081	16.9443	39.4987
942.05	27.4545	39.4088	30.1196	31.2923	32.2465	20.5503	26.9751	19.8453	16.9537	39.5121
942.5	27.5288	39.4767	30.1606	31.5179	32.338	20.6393	27.0856	19.9615	16.9901	39.5981
942.95	27.5828	39.5561	30.195	31.7414	32.3294	20.7614	27.1506	20.0129	16.9913	39.7129
943.4	27.6296	39.6306	30.1646	31.9359	32.3074	20.8985	27.1982	20.0406	16.9987	39.7923
943.85	27.6572	39.733	30.1934	32.0082	32.2713	20.8868	27.2325	20.0389	16.997	39.8535
944.3	27.6885	39.842	30.247	32.0564	32.2743	20.8259	27.269	20.1896	16.9345	39.9462
944.75	27.7396	39.952	30.2929	32.0888	32.3675	20.7277	27.3065	20.3097	16.9048	39.9711
945.2	27.8154	40.0839	30.3456	32.0777	32.4721	20.581	27.3521	20.4491	16.9223	40.0419
945.65	27.8922	40.1585	30.3716	32.0642	32.592	20.516	27.5343	20.5821	16.9622	40.1174
946.1	27.9291	40.1872	30.362	32.0259	32.6786	20.5118	27.6928	20.5058	17.0451	40.1222
946.55	27.9269	40.1748	30.4119	32.0259	32.7421	20.4203	27.8839	20.4362	17.1232	40.1795
947	27.8844	40.1423	30.3486	32.065	32.791	20.3799	28.0594	20.3809	17.154	40.2226
947.45	27.8474	40.1327	30.3002	32.1499	32.813	20.3273	27.9873	20.343	17.0872	40.235
947.9	27.8404	40.1643	30.2696	32.3107	32.7917	20.2643	27.9303	20.3764	17.0255	40.2866
948.35	27.8954	40.2369	30.2275	32.4601	32.7688	20.4204	27.8528	20.4179	16.9574	40.3345
948.8	27.9846	40.2991	30.3988	32.6206	32.739	20.5682	27.7478	20.3134	16.9091	40.3718
949.25	28.027	40.3431	30.5497	32.7319	32.7227	20.7164	27.7566	20.2033	17.0546	40.4291
949.7	28.0791	40.41	30.7016	32.7409	32.8319	20.8437	27.7511	20.0683	17.1883	40.4559
950.15	28.0825	40.4846	30.8374	32.6955	32.925	20.8886	27.7558	19.9709	17.3349	40.4531
950.6	28.0567	40.5783	30.8919	32.6162	33.0517	20.9271	27.831	20.1224	17.4932	40.4425
951.05	28.0861	40.717	30.951	32.5333	33.1685	20.9579	27.9249	20.296	17.5412	40.3364
951.5	28.1196	40.848	31.0026	32.5187	33.1745	21.0088	28.0281	20.4973	17.5778	40.2589
951.95	28.1807	40.9417	31.0028	32.5509	33.2087	21.0283	28.1131	20.6327	17.5955	40.2235
952.4	28.2694	41.0201	31.0189	32.5669	33.2261	21.0476	28.1641	20.6427	17.6275	40.2216
952.85	28.3388	41.0096	31.0733	32.6664	33.2439	21.0709	28.146	20.6193	17.6556	40.4387
953.3	28.3715	40.9465	31.1302	32.7295	33.2903	21.0713	28.1228	20.6269	17.7355	40.6386
953.75	28.3459	40.913	31.2385	32.7948	33.2883	21.0695	28.1195	20.6	17.8251	40.8164
954.2	28.3021	40.8738	31.3058	32.895	33.3068	21.0658	28.1153	20.592	17.8462	40.9756
954.65	28.2899	40.9407	31.3353	32.9097	33.3399	21.0788	28.1933	20.5941	17.8723	41.0134
955.1	28.312	41.0115	31.3687	32.8462	33.4034	21.1176	28.2665	20.5801	17.8368	41.0201
955.55	28.4177	41.0641	31.2876	32.8007	33.4854	21.1637	28.3163	20.6989	17.7941
956	28.5382	41.1263		32.7263	33.5044	21.1948	28.3989	20.7976	17.7995
956.45	28.6376	41.1349		32.6811	33.5081	21.228	28.4608	20.9131	17.8188
956.9	28.7319	41.1215		32.8247	33.4914	21.2371	28.5404	21.0144	17.8199
957.35	28.7807	41.0651		32.9323	33.4873	21.2242	28.6128	21.045	17.9177
957.8	28.7842	41.0335		33.1083	33.517	21.2485	28.6013	21.0639	18.0144
958.25	28.7648	41.0373		33.302	33.5535	21.2425	28.594	21.086	18.0895
958.7	28.7229	41.1425		33.3956	33.6042	21.2616	28.5577	21.1087	18.2329
959.15	28.6945	41.3099		33.4968	33.6772	21.3324	28.5605	21.0958	18.206
959.6	28.7205	41.4409		33.5328	33.7423	21.3344	28.6054	21.1051	18.16
960.05	28.7962	41.5088		33.5302	33.8189	21.3602	28.6524	21.0629	18.1298
960.5	28.8998	41.5403		33.5566	33.8822	21.3863	28.7484	21.0159	18.0786
960.95	28.9789	41.5576		33.5727	33.8702	21.3621	28.8351	21.0277	18.093
961.4	29.0366	41.5968		33.6145	33.8866	21.4082	28.9265	21.0654	18.1527
961.85	29.0504	41.6876		33.6776	33.9039	21.4394	29.0024	21.1497	18.2163
962.3	29.0342	41.7679		33.7005	33.9307	21.4373	29.0253	21.2587	18.2503
962.75	29.0101	41.8702		33.9468	34.0559	21.4412	29.0531	21.3665	18.2946
963.2	28.9748	41.9745			34.1763	21.4428	29.1173	21.4079	18.296
963.65	28.948	42.0481			34.2613	21.4704	29.1574	21.441	18.27
964.1	28.9429	42.1083			34.309	21.5279	29.2439	21.4255	18.2955
964.55	28.9931	42.1466			34.3387	21.6436	29.3267	21.3497	18.332
965	29.0953	42.181			34.3597	21.729	29.361	21.3392	18.3661
965.45	29.2162	42.261			34.4123	21.812	29.4428	21.3263	18.4047
965.9	29.3445	42.3823			34.4792	21.9025	29.4998	21.3997	18.4171
966.35	29.4464	42.5416			34.507	21.9484	29.5488	21.53	18.4349
966.8	29.4631	42.3053			34.5194	21.9991	29.5936	21.6273	18.4849
967.25	29.4408				34.55	21.9471	29.6079	21.7324	18.5397
967.7	29.3399				34.6083	21.8514	29.6228	21.8117	18.5689
968.15	29.2368				34.6753	21.7402	29.6318	21.8505	18.5561
968.6	29.1924				34.7738	21.6262	29.6762	21.9073	18.5028
969.05	29.1699				34.8197	21.6779	29.7361	21.9272	18.4877
969.5	29.3096				34.8828	21.7778	29.7832	21.8534	18.5269
969.95	29.449				34.9689	21.9226	29.8639	21.8088	18.5967
970.4	29.5615				35.0645	22.0862	29.9191	21.7338	18.6885
970.85	29.7062				35.2098	22.1584	30.0221	21.6915	18.7312
971.3	29.7616				35.3198	22.2261	30.1283	21.7346	18.7426
971.75	29.7865				35.426	22.2646	30.1732	21.7756	18.7764
972.2	29.8434				35.4977	22.3589	30.2177	21.873	18.7991
972.65	29.871				35.5283	22.4836	30.1673	21.942	18.8711
973.1	29.9127				35.5416	22.5948	30.1484	21.9911	18.9325
973.55	30.0051				35.5177	22.7086	30.1772	22.0288	18.9424
974	30.0903				35.4766	22.6762	30.2326	22.0095	18.9933
974.45	30.1697				35.4833	22.6082	30.3197	22.0494	19.0129
974.9	30.2031				35.491	22.5093	30.39	22.0967	19.034
975.35	30.203				35.5235	22.3949	30.4386	22.1148	19.0999
975.8	30.1572				35.6258	22.3913	30.4655	22.1528	19.1182
976.25	30.1386				35.6956	22.4107	30.4958	22.175	19.1324
976.7	30.1615				35.7731	22.4635	30.5282	22.1872	19.1673
977.15	30.1983				35.8735	22.5417	30.5799	22.295	19.159
977.6	30.2939				35.906	22.5923	30.6535	22.4075	19.1611
978.05	30.3478				35.9347	22.6412	30.7517	22.4968	19.1716
978.5	30.347				35.9548	22.7364	30.8155	22.592	19.1416
978.95	30.3694				35.9117	22.8149	30.8666	22.609	19.1547
979.4	30.3771				35.9012	22.8707	30.8932	22.6101	19.1981
979.85	30.4187				35.9031	22.9349	30.9136	22.6014	19.2463
980.3	30.4737				36.0322	22.8915	30.9901	22.5874	19.3531
980.75	30.4773				36.2187	22.8728	31.0594	22.6025	19.4487
981.2	30.453				36.3889	22.8839	31.1328	22.6197	19.5082
981.65	30.4196				36.5754	22.9056	31.1986	22.6647	19.4609
982.1	30.4294				36.6136	23.0153	31.2366	22.687	19.3851
982.55	30.49				36.627	23.1062	31.2879	22.6951	19.3008
983	30.5622				36.6203	23.1904	31.3186	22.7481	19.2302
983.45	30.6248				36.562	23.2055	31.3203	22.8027	19.3615
983.9	30.6887				36.5352	23.1822	31.3325	22.9328	19.4885
984.35	30.7115				36.5486	23.1258	31.3489	23.0654	19.6098
984.8	30.7709				36.6222	23.0619	31.4067	23.1515	19.7544
985.25	30.8226				36.7227	23.0322	31.5019	23.2114	19.7818
985.7	30.8647				36.8173	23.0011	31.5778	23.2105	19.8381
986.15	30.9268				36.8613	23.0326	31.6601	23.1977	19.9002
986.6	30.9674				36.8604	23.0685	31.7152	23.2319	20.0165
987.05	31.0225				36.8804	23.1511	31.7635	23.2826	20.1378
987.5	31.0587				36.9378	23.2345	31.8139	23.3179	20.2166
987.95	31.0783				37.0038	23.3119	31.835	23.3667	20.3013
988.4	31.0663				37.0838	23.409	31.889	23.3179	20.2075
988.85	31.044				37.1415	23.471	31.9353	23.2629	20.1172
989.3	31.0384				37.1644	23.5272	31.9861	23.2788	20.0283
989.75	31.0807				37.2103	23.543	32.0513	23.3028	19.9133
990.2	31.1938					23.5267	32.1226	23.4057	19.9013
990.65	31.4098					23.5367	32.2031	23.4808	19.9235
991.1	31.7035					23.593	32.3105	23.5135	19.8902
991.55	31.1101					23.5624	32.4116	23.5107	19.8825
						23.5266	32.4423	23.4414	19.878
						23.4591	32.4577	23.4275	19.8293
						23.3692	32.4289	23.4051	19.9508
						23.5014	32.3941	23.4281	20.0962
						23.6748	32.3928	23.5209	20.2522
						23.8581	32.4243	23.5946	20.4272
						23.9994	32.4922	23.6676	20.492
						24.0247	32.622	23.7189	20.516
						24.0457	32.8007	23.7791	20.5057
						24.0601	32.9835	23.8312	20.5577
						24.113	33.1928	23.8782	20.6207
						24.1466	33.1466	23.9457	20.7062
						24.1591		23.9732	20.7807
						24.2149		24.0052	20.6889
						24.3352		24.0744	20.5371
						24.5489		24.1375	20.2992
						24.2525		24.0765	20.6615

## Sheet: 2np(30ppm)
	run1	run2	run3	run4	run5	run6	run7	run9	run10	run11
Potential [mV]	di [µA/]	di [µA/]	di [µA/]	di [µA/]	di [µA/]	di [µA/]	di [µA/]	di [µA/]	di [µA/]	di [µA/]
200	70.7094	134.013	113.901	142.751	94.465	142.726	68.7978	54.2767	43.8381	160.37
200.45	59.5397	100.424	93.7067	114.09	79.7002	115.895	54.9471	46.185	37.4902	130.328
200.9	50.1729	77.7214	77.8205	91.3734	67.8256	94.8335	45.0645	39.6945	32.2309	106.671
201.35	42.7272	63.9074	66.2675	74.7257	59.0553	79.5883	38.6336	34.7746	28.2284	89.5383
201.8	37.8898	56.7249	58.188	63.174	52.9735	69.3716	34.8085	31.2853	25.2882	78.0736
202.25	35.1776	54.4662	52.918	55.7935	49.1168	63.2428	33.0595	28.9768	23.3033	71.1512
202.7	33.5801	52.7038	48.7754	50.7903	46.3609	58.9138	31.8197	27.2277	21.8713	65.8267
203.15	32.7776	51.1852	45.2965	47.342	44.1796	55.6309	30.7675	25.963	20.7042	61.3532
203.6	32.1024	49.8838	42.7835	45.0661	42.3962	52.9802	29.8974	24.9451	19.753	57.4172
204.05	31.4675	48.8558	40.9618	43.5714	40.8786	50.8008	29.064	24.094	18.9532	53.7567
204.5	30.9097	47.8689	39.71	42.3293	39.5905	48.9782	28.2365	23.3468	18.2884	51.1403
204.95	30.3225	47.0417	38.8714	41.1741	38.4946	47.4395	27.4992	22.6259	17.7795	49.2727
205.4	29.7499	46.3169	38.0605	40.1174	37.567	46.226	26.8149	21.9527	17.3792	47.8852
205.85	29.1352	45.5892	37.2773	39.1631	36.7666	45.1694	26.219	21.4012	16.9917	47.0159
206.3	28.5957	44.9523	36.4903	38.4707	36.0408	44.2169	25.5822	20.9485	16.5878	46.1505
206.75	28.1861	44.2848	35.774	37.8807	35.3638	43.385	24.849	20.5873	16.1464	45.3004
207.2	27.8283	43.5705	35.1974	37.3146	34.767	42.5377	24.1266	20.3201	15.7266	44.5401
207.65	27.6659	42.9078	34.7871	36.8288	34.2516	41.7947	23.4834	20.004	15.4059	43.8727
208.1	27.4702	42.3015	34.5135	36.2397	33.7702	41.1454	22.9799	19.7206	15.1374	43.3266
208.55	27.3329	41.7746	34.2419	35.7492	33.3676	40.5123	22.727	19.3898	14.9382	42.8963
209	27.1968	41.3424	33.9798	35.4441	32.9181	39.9606	22.5502	19.0646	14.7104	42.5224
209.45	26.9418	40.936	33.5847	35.0999	32.4356	39.4021	22.318	18.7844	14.4397	42.1017
209.9	26.7507	40.5382	33.2245	34.8547	31.9824	38.8589	22.1161	18.493	14.2983	41.6493
210.35	26.429	40.1949	32.8948	34.6419	31.543	38.3818	21.851	18.2451	14.1621	41.2267
210.8	26.1279	39.8401	32.4752	34.225	31.2098	37.9342	21.5836	17.9775	14.0768	40.7409
211.25	25.8511	39.5303	32.2326	33.9348	30.9115	37.5183	21.4061	17.7338	14.0045	40.3459
211.7	25.5714	39.1563	31.9855	33.586	30.6557	37.1491	21.2139	17.5164	13.7356	39.9328
212.15	25.3473	38.7165	31.7206	33.1765	30.507	36.7724	21.0479	17.3444	13.473	39.4891
212.6	25.1079	38.3531	31.5642	32.9208	30.3257	36.3908	20.9084	17.2105	13.2285	39.1936
213.05	24.8936	37.9773	31.3653	32.6473	30.1615	36.0666	20.7024	17.1092	13.027	38.9058
213.5	24.61	37.7411	31.2115	32.4384	29.9856	35.752	20.4811	16.9967	12.9271	38.6773
213.95	24.3401	37.5881	31.1623	32.2326	29.6198	35.5101	20.2202	16.8686	12.8311	38.4822
214.4	24.0502	37.4437	31.1173	31.913	29.2596	35.3198	19.9403	16.7417	12.716	38.2699
214.85	23.7906	37.4217	30.9383	31.4911	28.9241	35.1085	19.6944	16.5918	12.5628	37.9983
215.3	23.6017	37.3308	30.5479	30.9328	28.5761	34.9153	19.5019	16.4971	12.4304	37.7095
215.75	23.4368	37.1903	30.0778	30.4434	28.3218	34.6284	19.3535	16.3752	12.3279	37.3662
216.2	23.3355	36.9856	29.501	30.044	28.1119	34.4324	19.2201	16.2815	12.2508	36.9866
216.65	23.2054	36.5744	29.0555	29.7527	27.8854	34.2708	19.1432	16.1866	12.2077	36.692
217.1	23.0655	36.2063	28.8096	29.6632	27.7324	34.0833	19.039	16.0394	12.1357	36.4587
217.55	22.9217	35.8467	28.5633	29.5814	27.628	33.9925	18.941	15.932	12.0078	36.3134
218	22.6639	35.4814	28.4729	29.5789	27.5009	33.7095	18.855	15.7926	11.9019	36.2474
218.45	22.4353	35.2251	28.4482	29.6061	27.414	33.4331	18.7126	15.6906	11.7984	36.2024
218.9	22.2462	34.9574	28.3936	29.5923	27.2673	33.2093	18.5685	15.6164	11.7228	36.1565
219.35	22.052	34.7527	28.437	29.5472	27.1361	32.9483	18.4262	15.5334	11.7031	36.1154
219.8	22.0915	34.5921	28.4314	29.4079	27.0119	32.8	18.279	15.4529	11.626	35.9662
220.25	22.1745	34.4544	28.3277	29.1684	26.8906	32.6317	18.1923	15.3182	11.5433	35.7415
220.7	22.2296	34.3205	28.2358	28.8789	26.7974	32.429	18.1688	15.1635	11.4649	35.4652
221.15	22.3194	34.1254	28.0537	28.6742	26.6362	32.2846	18.1446	15.0367	11.3762	35.1324
221.6	22.2952	33.9562	27.9195	28.5173	26.517	32.1402	18.137	14.9383	11.3165	34.8627
222.05	22.1961	33.7965	27.8473	28.3815	26.3601	32.0054	18.1374	14.8973	11.2516	34.6256
222.5	22.0803	33.6635	27.7531	28.261	26.2323	31.9451	18.0939	14.9077	11.1418	34.3454
222.95	21.9466	33.6148	27.7415	28.0172	26.1556	31.8266	18.1139	14.9227	11.026	34.1139
223.4	21.7937	33.5937	27.581	27.752	26.0426	31.7246	18.1221	14.943	10.9449	33.8835
223.85	21.6844	33.588	27.3297	27.5595	25.9562	31.6284	18.0876	14.9211	10.8464	33.6817
224.3	21.6558	33.4819	27.1208	27.3687	25.8568	31.4385	18.0531	14.8485	10.7618	33.5631
224.75	21.6254	33.2906	26.8948	27.312	25.7541	31.3825	17.8933	14.7087	10.6789	33.4666
225.2	21.6103	33.0276	26.8242	27.2709	25.6412	31.3209	17.7869	14.5528	10.5529	33.3585
225.65	21.5778	32.7226	26.9178	27.2879	25.5376	31.2631	17.6877	14.4215	10.4986	33.2466
226.1	21.5047	32.5925	26.9935	27.3588	25.41	31.2513	17.695	14.3111	10.5155	33.1366
226.55	21.4846	32.495	27.0329	27.4116	25.2727	31.0606	17.7771	14.2581	10.5481	32.9884
227	21.4714	32.4328	27.0613	27.4471	25.1711	30.8645	17.79	14.2034	10.5887	32.8957
227.45	21.4732	32.3764	27.001	27.3368	25.0578	30.6867	17.8217	14.168	10.5829	32.7972
227.9	21.4706	32.2502	26.8932	27.1458	25.0111	30.5069	17.6361	14.1477	10.5368	32.6882
228.35	21.4142	32.1584	26.756	26.8186	24.9983	30.3753	17.4522	14.1175	10.4927	32.5954
228.8	21.3672	32.0723	26.5295	26.4752	24.9817	30.2483	17.3115	14.0887	10.5198	32.4768
229.25	21.2997	32.0264	26.2238	26.1986	24.9733	30.1027	17.1263	14.0515	10.5687	32.3535
229.7	21.2413	31.9948	25.9814	25.9935	24.895	29.9524	17.1052	14.0225	10.6119	32.2253
230.15	21.1729	31.9748	25.7938	25.8834	24.7898	29.8682	17.0759	14.0106	10.6121	32.1115
230.6	21.1011	31.9346	25.6262	25.8797	24.6693	29.7866	17.0785	14.0259	10.4927	32.0025
231.05	21.1517	31.8725	25.552	25.8847	24.5599	29.7489	17.1239	13.9929	10.3524	31.9298
231.5	21.1852	31.8017	25.457	25.8881	24.4586	29.7391	17.1431	13.9527	10.2301	31.8409
231.95	21.2418	31.6908	25.3521	25.9032	24.3721	29.6579	17.1449	13.8836	10.1857	31.7328
232.4	21.2742	31.6277	25.2879	25.8438	24.229	29.5779	17.0301	13.7641	10.2418	31.6401
232.85	21.1231	31.5894	25.2418	25.6908	24.0917	29.4168	16.9174	13.7103	10.2863	31.5406
233.3	21.0218	31.5263	25.2288	25.5001	24.0052	29.2043	16.764	13.6089	10.3013	31.5578
233.75	20.8984	31.4861	25.2233	25.2917	23.8972	29.0676	16.6135	13.5264	10.2334	31.5588
234.2	20.8019	31.4048	25.2378	25.1509	23.9111	28.9361	16.5191	13.4942	10.1233	31.5081
234.65	20.8057	31.3169	25.2258	25.2716	23.8687	28.8828	16.4223	13.4534	10.0642	31.4173
235.1	20.7426	31.2614	25.2079	25.5056	23.7925	28.8052	16.3404	13.4802	10.0414	31.2318
235.55	20.7348	31.2126	25.2364	25.7775	23.7605	28.6735	16.261	13.486	10.0617	31.1055
236	20.7249	31.1992	25.2431	25.9496	23.6642	28.5569	16.2166	13.4842	10.0698	31.0434
236.45	20.6882	31.1772	25.231	25.8329	23.6823	28.4195	16.1722	13.4758	10.0444	31.0252
236.9	20.6918	31.1591	25.212	25.581	23.696	28.454	16.1625	13.4484	10.0032	31.0137
237.35	20.6729	31.1304	25.1916	25.3538	23.6705	28.5205	16.2108	13.4556	9.96528	30.9812
237.8	20.6139	31.074	25.1528	25.1894	23.6763	28.5606	16.2575	13.4361	9.93047	30.8779
238.25	20.5565	31.0214	25.1667	25.2206	23.5789	28.5994	16.3295	13.3339	9.90981	30.7517
238.7	20.4835	30.9238	25.1827	25.2799	23.4865	28.525	16.3906	13.2454	9.85301	30.6695
239.15	20.3755	30.7976	25.1263	25.2057	23.4124	28.4252	16.3866	13.1415	9.79669	30.5987
239.6	20.2878	30.6704	25.0445	25.1316	23.3264	28.3472	16.3337	13.0691	9.79535	30.5928
240.05	20.2278	30.4476	24.9047	25.008	23.288	28.2759	16.2121	13.1461	9.76369	30.6136
240.5	20.178	30.2325	24.7386	24.9913	23.2736	28.2432	16.0722	13.1889	9.76159	30.5704
240.95	20.1634	30.0364	24.553	25.0841	23.2107	28.2375	15.9625	13.2339	9.74256	30.4908
241.4	20.1981	29.8203	24.4618	25.2025	23.1292	28.2279	15.9611	13.2439	9.66673	30.4047
241.85	20.2257	29.761	24.4384	25.329	23.035	28.1664	15.9965	13.1774	9.60725	30.2896
242.3	20.2566	29.7142	24.4154	25.3619	22.9133	28.0635	16.0559	13.1269	9.57043	30.2133
242.75	20.2892	29.6883	24.5222	25.3253	22.8786	27.9892	16.1161	13.0953	9.46476	30.1625
243.2	20.2733	29.7687	24.6123	25.1196	22.8745	27.9013	16.0477	13.093	9.3547	30.1252
243.65	20.258	29.7983	24.6023	24.8506	22.8796	27.8554	15.9868	13.0667	9.25266	30.1285
244.1	20.2282	29.8155	24.599	24.5544	22.925	27.8278	15.9075	13.0299	9.11573	30.1395
244.55	20.1905	29.8232	24.4412	24.3957	22.9227	27.7339	15.825	12.9555	9.14642	30.1911
245	20.1756	29.7945	24.2371	24.4275	22.7969	27.6608	15.8043	12.9004	9.24167	30.2074
245.45	20.1449	29.7467	24.102	24.4947	22.6424	27.6264	15.775	12.8835	9.34858	30.1938
245.9	20.1252	29.7543	23.97	24.6079	22.4513	27.5839	15.7948	12.7948	9.48963	30.1815
246.35	20.0857	29.7688	23.9211	24.6126	22.2581	27.5829	15.7846	12.732	9.53926	30.0741
246.8	20.0529	29.7843	23.8999	24.5772	22.2845	27.5703	15.7779	12.6247	9.51353	30.0846
247.25	20.026	29.8017	23.8705	24.5262	22.3565	27.5422	15.7995	12.5283	9.48227	30.0936
247.7	19.9961	29.8373	23.8846	24.4603	22.4232	27.5561	15.7293	12.6141	9.44134	30.1087
248.15	20.0017	29.8936	23.8967	24.4004	22.5287	27.5725	15.7244	12.697	9.41427	30.1939
248.6	19.983	29.8714	23.9076	24.3342	22.5242	27.5852	15.7099	12.8175	9.44793	30.0922
249.05	19.946	29.8788	23.9193	24.2782	22.4953	27.5666	15.7932	12.9276	9.43952	30.0291
249.5	19.9311	29.8213	23.8651	24.1726	22.4992	27.4899	15.9135	12.9439	9.41867	29.9293
249.95	19.9086	29.7113	23.8119	24.0979	22.4577	27.3917	15.9992	12.9477	9.40624	29.8118
250.4	19.8949	29.6539	23.7463	24.0468	22.4083	27.2908	16.0879	12.9227	9.3568	29.764
250.85	19.9042	29.5917	23.7014	24.01	22.3681	27.213	15.9551	12.864	9.36885	29.6631
251.3	19.8832	29.5487	23.8349	24.0545	22.3154	27.1265	15.8488	12.7664	9.38319	29.5762
251.75	19.8393	29.5127	23.9602	24.0843	22.2666	27.0597	15.7387	12.6878	9.34169	29.5116
252.2	19.7905	29.4825	24.087	24.0459	22.2268	27.0441	15.631	12.6121	9.32697	29.4652
252.65	19.7726	29.4389	24.1718	24.0014	22.1581	27.0208	15.6137	12.5771	9.26605	29.4526
253.1	19.7578	29.4565	23.9838	23.9562	22.0821	27.0537	15.5862	12.6243	9.22455	29.5075
253.55	19.79	29.568	23.8011	23.8303	22.0427	27.0787	15.5877	12.6684	9.25496	29.5187
254	19.845	29.5265	23.5958	23.735	22.0217	27.0399	15.5832	12.7364	9.25764	29.5336
254.45	19.8665	29.4735	23.4229	23.6341	22.0305	27.0731	15.595	12.7814	9.27647	29.5492
254.9	19.891	29.2838	23.3751	23.5355	22.0354	27.0765	15.5791	12.756	9.25094	29.4913
255.35	19.8753	28.9683	23.2856	23.6202	22.02	27.0835	15.4691	12.7567	9.20954	29.5899
255.8	19.8556	28.9224	23.2528	23.7382	21.9547	27.1415	15.3539	12.7354	9.19816	29.6581
256.25	19.8324	28.8535	23.2274	23.9081	21.8819	27.0837	15.2566	12.7465	9.21088	29.6686
256.7	19.8011	28.8612	23.205	24.074	21.8498	27.0394	15.2345	12.7867	9.28135	29.67
257.15	19.7884	28.9138	23.2768	24.1273	21.8177	26.9741	15.3008	12.7736	9.27982	29.433
257.6	19.7607	28.8564	23.3121	24.1495	21.8446	26.8786	15.376	12.7968	9.23077	29.2377
258.05	19.7214	28.8774	23.3319	24.0986	21.8887	26.794	15.4306	12.8009	9.16039	29.1059
258.5	19.7191	28.931	23.3953	23.9956	21.8959	26.7048	15.426	12.8145	9.06323	29.0067
258.95	19.6789	29.062	23.4188	23.9027	21.9068	26.658	15.427	12.8285	9.06361	28.9857
259.4	19.648	29.0986	23.4361	23.7893	21.903	26.6074	15.4524	12.7781	9.11668	28.9507
259.85	19.6259	29.1276	23.4496	23.7142	21.8888	26.6126	15.5114	12.6949	9.17023	28.9166
260.3	19.5861	29.1642	23.3636	23.6508	21.8405	26.6368	15.5554	12.5685	9.23096	28.8589
260.75	19.5997	29.0794	23.2689	23.606	21.7953	26.6907	15.5746	12.4759	9.27198	28.8485
261.2	19.6093	29.1145	23.2064	23.7046	21.6926	26.7579	15.587	12.4323	9.29321	28.8812
261.65	19.6618	29.0463	23.1481	23.825	21.5897	26.7933	15.545	12.4177	9.34609	28.9526
262.1	19.7215	28.8949	23.1782	24.0025	21.5638	26.7927	15.5492	12.4314	9.34954	29.0162
262.55	19.7494	28.8086	23.2209	24.1548	21.5257	26.6952	15.5289	12.4489	9.29885	29.0409
263	19.7776	28.7053	23.1917	24.1201	21.5707	26.5853	15.4276	12.4843	9.22149	28.9889
263.45	19.7494	28.6795	23.181	24.0484	21.6148	26.4906	15.3511	12.5579	9.08522	28.8378
263.9	19.7225	28.7015	23.1535	23.9779	21.6277	26.4067	15.2535	12.6751	9.03607	28.7231
264.35	19.7025	28.7263	23.1161	23.9511	21.6422	26.3668	15.2801	12.7676	9.0375	28.6657
264.8	19.6871	28.7273	23.1833	23.9633	21.6106	26.3503	15.3836	12.8149	9.09019	28.6461
265.25	19.7591	28.7053	23.2316	23.995	21.5677	26.3025	15.477	12.7984	9.15952	28.6843
265.7	19.8265	28.6938	23.2534	23.9721	21.4989	26.2568	15.5527	12.7093	9.1623	28.7471
266.15	19.9072	28.6804	23.2477	23.9465	21.4267	26.1841	15.4254	12.6277	9.14595	28.7728
266.6	19.9847	28.6623	23.2056	24.0019	21.3649	26.0616	15.2885	12.5689	9.20313	28.7639
267.05	19.9517	28.6267	23.1954	24.0978	21.3247	25.9838	15.1666	12.5406	9.28594	28.7222
267.5	19.9119	28.5376	23.2089	24.24	21.3209	25.9115	15.1075	12.5493	9.4028	28.626
267.95	19.8531	28.3995	23.2849	24.2915	21.3682	25.8808	15.1765	12.5668	9.51545	28.515
268.4	19.7701	28.2987	23.3569	24.2784	21.4768	25.8948	15.2573	12.5548	9.4225	28.4512
268.85	19.7112	28.2499	23.3678	24.1466	21.5739	25.9186	15.3693	12.5685	9.35097	28.4164
269.3	19.6756	28.2423	23.3979	24.0316	21.6513	25.9607	15.4189	12.5618	9.27896	28.4087
269.75	19.6799	28.2924	23.386	23.9989	21.6498	25.9911	15.4424	12.5558	9.24291	28.4365
270.2	19.7202	28.2985	23.3631	23.9872	21.5431	26.0255	15.4325	12.5801	9.31549	28.3503
270.65	19.7961	28.3035	23.3687	24.0526	21.4503	26.0238	15.3481	12.5694	9.30536	28.2919
271.1	19.8024	28.3486	23.3258	24.0349	21.391	25.9972	15.2652	12.6115	9.2935	28.2254
271.55	19.7568	28.3897	23.2292	24.0008	21.3843	25.9595	15.1896	12.6498	9.24425	28.1129
272	19.7184	28.427	23.1376	24.0337	21.4517	25.9356	15.2241	12.6895	9.20676	28.1998
272.45	19.6875	28.428	23.06	24.0505	21.5172	25.959	15.2817	12.7191	9.24951	28.2227
272.9	19.7181	28.3821	22.9725	24.1198	21.5209	26.0005	15.3486	12.699	9.26576	28.2322
273.35	19.7657	28.3486	23.0247	24.1884	21.5217	26.0894	15.4132	12.6685	9.27332	28.3051
273.8	19.7567	28.3429	23.0758	24.137	21.4798	26.1419	15.2879	12.6114	9.26452	28.283
274.25	19.7172	28.3716	23.1088	24.1123	21.4192	26.1376	15.1537	12.5942	9.195	28.2959
274.7	19.6662	28.4117	23.2037	24.0645	21.3986	26.1061	15.0501	12.598	9.15723	28.3588
275.15	19.6277	28.4222	23.2171	23.9891	21.3628	26.0163	14.9354	12.5964	9.16287	28.3711
275.6	19.6694	28.437	23.2028	23.9339	21.3232	25.9345	14.9428	12.625	9.15646	28.3714
276.05	19.7014	28.4727	23.1963	23.8203	21.2901	25.8485	14.9953	12.5888	9.22206	28.3942
276.5	19.7234	28.5008	23.1797	23.6979	21.2827	25.7838	15.0569	12.5428	9.26146	28.3677
276.95	19.7498	28.5108	23.1586	23.5688	21.3057	25.7412	15.1419	12.5392	9.26519	28.3365
277.4	19.753	28.5085	23.1875	23.4423	21.3724	25.7209	15.189	12.5141	9.29656	28.3404
277.85	19.8423	28.4211	23.2413	23.401	21.4608	25.7382	15.225	12.5664	9.24989	28.3144
278.3	19.9358	28.3509	23.2337	23.3936	21.4906	25.7575	15.166	12.5945	9.22876	28.3011
278.75	20.0139	28.3027	23.2069	23.4622	21.4749	25.7869	15.0918	12.5978	9.21805	28.3451
279.2	20.0721	28.2759	23.1674	23.5588	21.4255	25.7578	15.0542	12.6314	9.19108	28.3247
279.65	20.0349	28.3295	23.0947	23.6049	21.3364	25.7411	14.9854	12.5919	9.2082	28.2997
280.1	19.997	28.3658	23.1646	23.6331	21.3234	25.6705	14.9834	12.6011	9.2278	28.2515
280.55	19.9692	28.4117	23.2615	23.6129	21.3337	25.6001	14.9908	12.5978	9.19012	28.1596
281	19.9142	28.4308	23.3435	23.625	21.3655	25.5888	14.9986	12.5876	9.16201	28.0987
281.45	19.878	28.4203	23.4401	23.6351	21.4328	25.5442	15.0236	12.6141	9.12864	28.0292
281.9	19.8641	28.4481	23.3778	23.6412	21.444	25.5714	15.0677	12.6295	9.06476	27.9884
282.35	19.8206	28.5188	23.3346	23.7346	21.4468	25.5724	15.0895	12.6562	9.13858	27.945
282.8	19.8317	28.6001	23.3204	23.7787	21.4308	25.5762	15.0935	12.6544	9.21967	27.9553
283.25	19.8736	28.603	23.2926	23.8359	21.4177	25.593	15.1445	12.6941	9.30641	28.0445
283.7	19.8971	28.581	23.312	23.922	21.3979	25.6339	15.1786	12.7188	9.41647	28.1658
284.15	19.9626	28.4978	23.2554	23.8522	21.3946	25.6991	15.2491	12.7548	9.4247	28.2999
284.6	19.9954	28.4299	23.1708	23.8421	21.3794	25.7443	15.2981	12.8079	9.40079	28.3603
285.05	20.0047	28.5064	23.0828	23.8198	21.3487	25.7692	15.2876	12.8064	9.40223	28.3289
285.5	20.0229	28.538	23.013	23.7583	21.3677	25.7385	15.2704	12.7884	9.37545	28.3274
285.95	20.0329	28.5781	23.081	23.743	21.3695	25.7238	15.2423	12.7621	9.39171	28.3602
286.4	20.0712	28.5915	23.1619	23.6859	21.3984	25.7046	15.2453	12.7316	9.43981	28.4214
286.85	20.1204	28.5408	23.2718	23.646	21.4346	25.7314	15.2711	12.7198	9.41638	28.5112
287.3	20.1409	28.5485	23.3693	23.6533	21.4183	25.7501	15.2953	12.7861	9.43818	28.4619
287.75	20.2481	28.5552	23.3908	23.6972	21.4095	25.7364	15.2992	12.8229	9.43034	28.3521
288.2	20.3113	28.5867	23.3819	23.7113	21.4035	25.7388	15.2884	12.8852	9.429	28.2583
288.65	20.3919	28.6049	23.3781	23.7074	21.435	25.6957	15.2648	12.934	9.48504	28.1677
289.1	20.4818	28.5896	23.3569	23.664	21.4769	25.7037	15.2412	12.8775	9.47605	28.1477
289.55	20.3703	28.5619	23.3166	23.518	21.5087	25.7351	15.2052	12.8764	9.46926	28.1721
290	20.2841	28.4986	23.3088	23.3962	21.5591	25.7757	15.1499	12.8759	9.48542	28.1638
290.45	20.1261	28.4572	23.3192	23.2732	21.5488	25.8937	15.1253	12.8934	9.48829	28.1338
290.9	20.0062	28.4398	23.3921	23.172	21.5539	25.964	15.0915	12.9785	9.55351	28.1109
291.35	20.0161	28.4721	23.5261	23.2678	21.5801	25.9968	15.0741	13.0381	9.63469	28.0846
291.8	20.1054	28.5086	23.6786	23.375	21.5586	26.0041	15.0951	13.0614	9.62676	28.1259
292.25	20.2475	28.5326	23.8261	23.514	21.5136	25.9069	15.1117	13.0907	9.58812	28.1961
292.7	20.3811	28.5757	23.9175	23.6964	21.4927	25.8701	15.1841	13.0961	9.53381	28.2793
293.15	20.4634	28.5576	23.969	23.7812	21.4675	25.8764	15.2547	13.0764	9.48227	28.3374
293.6	20.3716	28.5836	24.006	23.8412	21.4685	25.9004	15.1836	13.0514	9.50158	28.2989
294.05	20.2876	28.6305	23.8865	23.8651	21.548	25.9845	15.0956	13.0042	9.57177	28.3737
294.5	20.1669	28.6316	23.8414	23.8041	21.5982	26.0084	14.9409	12.9695	9.63632	28.4262
294.95	20.0973	28.6728	23.7961	23.7482	21.6364	26.0196	14.8488	13.0403	9.64292	28.4866
295.4	20.1632	28.7101	23.7301	23.7401	21.6728	25.9934	15.0405	13.1475	9.60065	28.587
295.85	20.2054	28.6986	23.9016	23.7726	21.6618	25.9344	15.2216	13.2754	9.54174	28.4491
296.3	20.2442	28.712	24.1158	23.86	21.6095	25.8749	15.4662	13.4015	9.50005	28.301
296.75	20.2531	28.7043	24.3242	23.9459	21.5897	25.8085	15.6214	13.366	9.53811	28.1734
297.2	20.2345	28.6316	24.5653	23.9553	21.5338	25.7805	15.582	13.3013	9.59903	28.0394
297.65	20.2609	28.5874	24.628	23.93	21.4845	25.7805	15.5495	13.2196	9.63297	28.0168
298.1	20.3399	28.4956	24.4751	23.8684	21.4858	25.7907	15.4791	13.122	9.64789	28.0305
298.55	20.427	28.4803	24.2987	23.7669	21.4531	25.8229	15.5778	13.1169	9.63546	28.0173
299	20.4838	28.5568	24.0593	23.7742	21.4942	25.8603	15.7237	13.1267	9.65066	28.0531
299.45	20.5043	28.6664	23.8913	23.8011	21.5463	25.8839	15.8793	13.1637	9.69599	28.117
299.9	20.4973	28.8423	23.8495	23.8856	21.5936	25.9372	16.0005	13.2311	9.72975	28.1649
300.35	20.5456	28.8978	23.8631	24.0161	21.6658	25.9649	15.8534	13.2955	9.75251	28.2691
300.8	20.6095	28.8423	23.9562	24.1119	21.6992	25.9803	15.7034	13.3707	9.73338	28.3366
301.25	20.6605	28.7349	24.0615	24.2189	21.683	26.0872	15.5429	13.3989	9.69618	28.3821
301.7	20.6916	28.6058	24.1621	24.2506	21.6766	26.173	15.4462	13.4026	9.69915	28.4214
302.15	20.6146	28.537	24.2286	24.2733	21.6405	26.2563	15.4972	13.3749	9.73692	28.3582
302.6	20.5464	28.536	24.2481	24.2449	21.5809	26.3024	15.5453	13.2897	9.79678	28.347
303.05	20.5034	28.581	24.2449	24.1665	21.6124	26.2025	15.6264	13.2295	9.85731	28.3552
303.5	20.4826	28.6517	24.1844	24.1395	21.6175	26.1025	15.6778	13.1726	9.87118	28.3677
303.95	20.5117	28.7216	24.0927	24.1157	21.6423	26.0121	15.7256	13.164	9.86085	28.4605
304.4	20.5242	28.8315	23.9755	24.1617	21.7099	25.9752	15.7731	13.2559	9.85129	28.4492
304.85	20.5325	28.9185	23.878	24.2051	21.705	26.0116	15.7957	13.3573	9.85253	28.4298
305.3	20.5695	28.975	23.8698	24.2482	21.7164	26.0121	15.8306	13.4552	9.88983	28.4367
305.75	20.5879	29.0156	23.8923	24.2696	21.71	26.0138	15.8653	13.5201	9.90197	28.4205
306.2	20.6207	29.018	23.9612	24.2015	21.6828	26.0131	15.8628	13.5278	9.92033	28.4187
306.65	20.6676	29.0309	24.0155	24.2142	21.6782	25.9807	15.8288	13.5249	9.99023	28.3756
307.1	20.6755	29.0295	23.9983	24.2254	21.7038	26.0084	15.7695	13.527	10.0555	28.2801
307.55	20.7329	29.0357	24.0164	24.3034	21.7679	26.0767	15.6745	13.5389	10.1346	28.1886
308	20.7935	29.0123	24.0198	24.4644	21.8474	26.1513	15.6304	13.5737	10.2223	28.1896
308.45	20.8411	28.9697	24.0012	24.5653	21.9656	26.2447	15.5999	13.6215	10.2138	28.2296
308.9	20.8932	28.9558	24.0634	24.6233	22.0488	26.3135	15.5803	13.6767	10.2027	28.3407
309.35	20.9259	28.9453	24.1107	24.6136	22.0908	26.3025	15.6212	13.7273	10.2218	28.4345
309.8	20.954	28.9491	24.1472	24.5563	22.1133	26.2085	15.6217	13.7535	10.2121	28.4658
310.25	20.9826	28.9444	24.2265	24.5068	22.0844	26.1123	15.6623	13.764	10.2492	28.4913
310.7	21.0155	28.9032	24.2528	24.5005	22.0588	26.0442	15.7267	13.7703	10.2511	28.4479
311.15	21.0392	28.8908	24.2135	24.4917	22.0627	26.0349	15.7609	13.7685	10.2051	28.4563
311.6	21.0617	28.8937	24.1965	24.5031	22.0696	26.0253	15.8543	13.7534	10.1781	28.4809
312.05	21.0608	28.9377	24.1732	24.447	22.1065	26.0335	15.9275	13.744	10.1645	28.4961
312.5	21.0749	29.0668	24.1683	24.3925	22.1363	25.9774	15.8734	13.739	10.1946	28.5519
312.95	21.091	29.0935	24.2371	24.3548	22.1392	25.8874	15.7869	13.7611	10.2818	28.559
313.4	21.114	29.0562	24.3033	24.2736	22.1308	25.9744	15.6731	13.7995	10.3307	28.5767
313.85	21.1661	28.9874	24.3261	24.3478	22.1007	26.0386	15.5448	13.8498	10.3223	28.6262
314.3	21.1915	28.8105	24.3336	24.4026	22.1217	26.1742	15.6592	13.8955	10.3082	28.627
314.75	21.1949	28.7608	24.3071	24.4662	22.1685	26.3447	15.8357	13.9129	10.2463	28.6403
315.2	21.185	28.8172	24.2714	24.6182	22.2516	26.3747	16.0391	13.9568	10.237	28.6147
315.65	21.159	28.8899	24.2804	24.6975	22.3353	26.4112	16.2532	14.0067	10.3115	28.5769
316.1	21.162	29.0486	24.271	24.7135	22.3326	26.4333	16.2801	14.0545	10.3637	28.5976
316.55	21.2269	29.1576	24.2829	24.7182	22.3223	26.4285	16.2845	14.0947	10.4357	28.6316
317	21.2834	29.2226	24.2934	24.6418	22.3153	26.4853	16.2171	14.0919	10.4888	28.7001
317.45	21.3534	29.281	24.2722	24.5317	22.3452	26.5579	16.1824	14.0654	10.4628	28.7855
317.9	21.4001	29.2858	24.3041	24.5904	22.4344	26.5986	16.2442	14.0009	10.446	28.8557
318.35	21.393	29.3164	24.3001	24.6596	22.5081	26.6391	16.2941	13.965	10.4638	28.8916
318.8	21.3661	29.3412	24.3065	24.7408	22.5373	26.6269	16.3919	13.9413	10.4753	28.9282
319.25	21.3215	29.3307	24.3438	24.922	22.5248	26.612	16.4197	13.9112	10.528	28.9043
319.7	21.2915	29.3345	24.3533	24.9713	22.5147	26.609	16.3772	13.9633	10.5716	28.8659
320.15	21.2808	29.2953	24.4186	25.0167	22.5026	26.6597	16.3282	14.0195	10.5452	28.844
320.6	21.3472	29.2523	24.4763	25.104	22.5245	26.7148	16.2732	14.0828	10.5402	28.7971
321.05	21.4523	29.2399	24.5266	25.0313	22.5719	26.7718	16.2701	14.1542	10.5236	28.7989
321.5	21.524	29.1978	24.6063	24.9927	22.5749	26.8113	16.3152	14.1539	10.546	28.7756
321.95	21.6077	29.1815	24.6443	24.9452	22.6105	26.774	16.4213	14.1463	10.5993	28.7572
322.4	21.6673	29.1806	24.6711	24.8713	22.6316	26.8561	16.5503	14.1646	10.6041	28.7365
322.85	21.7115	29.2035	24.6584	24.8957	22.6401	26.9337	16.641	14.1866	10.6291	28.6987
323.3	21.7776	29.2552	24.5795	24.9149	22.6834	27.0373	16.6745	14.2803	10.6733	28.7484
323.75	21.8283	29.2953	24.5001	25.0182	22.7187	27.1757	16.6229	14.3581	10.7288	28.7822
324.2	21.859	29.3269	24.448	25.1123	22.7234	27.1488	16.5314	14.4008	10.8444	28.8467
324.65	21.8716	29.3259	24.3912	25.1965	22.704	27.098	16.4771	14.4681	10.9285	28.8908
325.1	21.8896	29.3374	24.3832	25.2864	22.6939	27.0393	16.4941	14.484	10.9447	28.8596
325.55	21.8885	29.3211	24.4241	25.2372	22.6708	26.9948	16.5417	14.5035	10.9497	28.859
326	21.8687	29.323	24.4313	25.1973	22.7115	27.0023	16.5964	14.5401	10.9296	28.8331
326.45	21.8176	29.3307	24.525	25.1457	22.8047	27.0349	16.6491	14.5438	10.9524	28.8311
326.9	21.7831	29.3383	24.6229	25.0654	22.8608	27.0736	16.6368	14.5508	10.9755	28.8396
327.35	21.7629	29.3661	24.6726	25.0416	22.911	27.0897	16.6269	14.5815	10.9907	28.8369
327.8	21.7606	29.2762	24.7689	25.0494	22.9052	27.1008	16.6179	14.5645	10.9915	28.8526
328.25	21.7526	29.2322	24.8218	25.0607	22.8433	27.114	16.6019	14.5435	10.9593	28.8341
328.7	21.7061	29.171	24.8165	25.1234	22.7935	27.1373	16.6206	14.5096	10.9447	28.8271
329.15	21.6509	29.1327	24.9316	25.1981	22.7701	27.1532	16.6186	14.4415	10.9635	28.8515
329.6	21.6212	29.2609	25.0046	25.2101	22.7778	27.1497	16.691	14.4249	10.9687	28.8754
330.05	21.7036	29.2924	25.0627	25.2497	22.8355	27.1253	16.7625	14.4416	10.976	28.8681
330.5	21.833	29.3164	25.1883	25.2582	22.8996	27.0748	16.8517	14.4848	10.9953	28.867
330.95	21.9569	29.325	25.0843	25.2085	22.9416	27.0216	16.9951	14.5407	10.9772	28.8081
331.4	22.0551	29.2513	24.9737	25.2073	22.9765	27.0293	16.9933	14.5838	11.0203	28.726
331.85	22.0797	29.2494	24.8495	25.1859	22.9813	27.0396	16.9639	14.5926	11.0747	28.8101
332.3	22.0378	29.2561	24.7103	25.1555	23.0111	27.0633	16.9127	14.6169	11.1189	28.8877
332.75	22.0214	29.2657	24.6979	25.2241	23.0253	27.1547	16.813	14.6508	11.1888	28.9994
333.2	21.9904	29.303	24.6205	25.259	23.0557	27.2043	16.8056	14.6982	11.1785	29.1274
333.65	21.9867	29.3422	24.5972	25.2689	23.1053	27.2667	16.8438	14.7694	11.1311	29.1663
334.1	22.0277	29.412	24.5432	25.3475	23.1288	27.3361	16.8767	14.7941	11.0852	29.1854
334.55	22.0754	29.4961	24.4873	25.3756	23.2039	27.3119	16.8823	14.8093	11.0015	29.1762
335	22.1278	29.5611	24.6058	25.4379	23.2465	27.3946	16.8721	14.7983	10.976	29.173
335.45	22.1154	29.6023	24.702	25.5137	23.2699	27.4885	16.8517	14.7594	10.9827	29.1458
335.9	22.1063	29.5859	24.8119	25.5326	23.2738	27.574	16.8354	14.7584	10.9869	29.1193
336.35	22.0729	29.5437	24.8995	25.558	23.217	27.7217	16.9094	14.7589	11.0169	29.1054
336.8	22.1084	29.5236	24.9132	25.5753	23.1859	27.7044	16.9647	14.7736	11.0399	29.0562
337.25	22.199	29.5072	24.922	25.6115	23.1764	27.6615	16.9635	14.8102	11.0732	29.0289
337.7	22.2723	29.5398	25.017	25.6554	23.1999	27.6183	16.9465	14.8306	11.0998	29.0395
338.15	22.3643	29.5504	25.1119	25.6754	23.2728	27.5452	16.8976	14.8485	11.1128	29.0691
338.6	22.3514	29.5467	25.2013	25.611	23.3422	27.5382	16.887	14.8787	11.1147	29.0348
339.05	22.3232	29.5564	25.2417	25.5494	23.4066	27.553	16.952	14.9084	11.1263	28.9972
339.5	22.2996	29.5439	25.1359	25.4905	23.4707	27.5479	17.0557	14.9295	11.1785	28.9332
339.95	22.2717	29.5698	25.0815	25.4549	23.5078	27.566	17.1423	14.9685	11.2605	28.8582
340.4	22.2809	29.5822	24.9975	25.5704	23.5325	27.6003	17.2024	14.9918	11.3299	28.9837
340.85	22.2996	29.5678	24.984	25.6626	23.5382	27.6311	17.2082	15.0959	11.3543	29.1037
341.3	22.3073	29.5841	25.0377	25.7274	23.5375	27.6993	17.1749	15.1805	11.3295	29.2072
341.75	22.2997	29.6243	24.9564	25.8127	23.544	27.7553	17.1196	15.2443	11.2849	29.2977
342.2	22.3035	29.6845	24.8745	25.809	23.5683	27.816	17.043	15.3035	11.2588	29.2881
342.65	22.304	29.8165	24.7672	25.8365	23.6031	27.8619	17.0122	15.1952	11.2592	29.2704
343.1	22.3031	29.7916	24.6436	25.8762	23.6465	27.8695	17.0143	15.1384	11.2566	29.3096
343.55	22.3188	29.7237	24.7299	25.8788	23.6982	27.8366	17.0545	15.0944	11.2366	29.3479
344	22.3322	29.6204	24.87	25.8822	23.7108	27.7764	17.1394	15.0706	11.2176	29.3746
344.45	22.3457	29.434	24.9909	25.8521	23.7137	27.7338	17.2016	15.1327	11.1829	29.391
344.9	22.3825	29.4866	25.1762	25.8406	23.6839	27.7384	17.1201	15.1865	11.195	29.3574
345.35	22.4322	29.5306	25.2386	25.8514	23.6429	27.8358	17.0379	15.2526	11.2394	29.3023
345.8	22.4883	29.6128	25.2483	25.8883	23.6362	27.9311	16.9539	15.2881	11.2775	29.2491
346.25	22.5426	29.6845	25.27	25.9109	23.6587	27.9943	16.8508	15.3117	11.3229	29.2271
346.7	22.6118	29.6501	25.1982	25.8824	23.7017	28.0189	16.9943	15.2982	11.3662	29.2347
347.15	22.6376	29.6444	25.177	25.9031	23.7327	27.9556	17.0902	15.2125	11.3961	29.2847
347.6	22.6626	29.5985	25.1758	25.9133	23.7418	27.9612	17.16	15.1284	11.4371	29.3391
348.05	22.6662	29.6128	25.2053	25.9534	23.7266	27.9957	17.2343	15.0566	11.4774	29.3568
348.5	22.6502	29.6137	25.2719	26.0396	23.7164	28.0644	17.1885	15.0941	11.4635	29.3264
348.95	22.6603	29.6185	25.2456	25.9996	23.7372	28.1968	17.1778	15.2213	11.4497	29.3183
349.4	22.6708	29.6625	25.182	25.9296	23.7824	28.2297	17.1961	15.3631	11.4186	29.3066
349.85	22.6939	29.6596	25.0878	25.8599	23.8206	28.2274	17.2368	15.5035	11.3927	29.3319
350.3	22.713	29.6606	25.0013	25.7886	23.8416	28.1832	17.2615	15.4775	11.404	29.4291
350.75	22.7406	29.6377	24.9718	25.7854	23.8368	28.0928	17.2969	15.4057	11.412	29.4968
351.2	22.7376	29.5946	25.0158	25.8358	23.807	28.0374	17.3102	15.3473	11.3657	29.5716
351.65	22.7724	29.5717	25.0393	25.8771	23.8195	28.0089	17.3411	15.279	11.3103	29.6247
352.1	22.7875	29.5583	25.048	25.9359	23.8204	28.0108	17.3728	15.2721	11.2222	29.608
352.55	22.7727	29.5439	25.0344	25.9771	23.8211	28.057	17.4134	15.2656	11.1455	29.5787
353	22.7879	29.5592	24.9513	25.9504	23.8461	28.1228	17.4473	15.2556	11.1913	29.5352
353.45	22.7354	29.5774	24.9399	25.931	23.8145	28.241	17.4639	15.26	11.234	29.5042
353.9	22.7081	29.5908	24.935	25.8873	23.7991	28.3475	17.5199	15.2838	11.3136	29.472
354.35	22.7031	29.6013	24.9755	25.9155	23.7806	28.3633	17.5241	15.3068	11.3622	29.4262
354.8	22.7023	29.5535	25.0627	25.9897	23.7498	28.3615	17.5408	15.2817	11.3516	29.3855
355.25	22.7292	29.5305	25.0604	26.0204	23.7242	28.2878	17.5492	15.257	11.3819	29.34
355.7	22.7354	29.5248	25.0613	26.0161	23.7303	28.184	17.5141	15.2278	11.4118	29.2711
356.15	22.7468	29.5592	25.0397	25.915	23.7355	28.0962	17.4838	15.208	11.4693	29.2273
356.6	22.7359	29.6128	25.004	25.8303	23.756	28.0168	17.4356	15.228	11.5043	29.1618
357.05	22.728	29.5793	25.0208	25.8126	23.8087	27.9488	17.3772	15.2285	11.4824	29.0924
357.5	22.7418	29.456	25.0627	25.8465	23.8336	27.9294	17.3063	15.2372	11.4479	29.1629
357.95	22.7148	29.3364	25.0626	25.9177	23.8504	27.9672	17.2776	15.248	11.4108	29.2261
358.4	22.6706	29.2312	25.0832	25.9461	23.8657	28.0093	17.2641	15.2733	11.4127	29.3098
358.85	22.6457	29.2217	25.0785	25.9027	23.8584	28.0829	17.2439	15.3024	11.4533	29.391
359.3	22.5084	29.3536	25.0258	25.829	23.8392	28.1335	17.2968	15.3049	11.4588	29.3662
359.75	22.4007	29.3823	25.0527	25.7227	23.8649	28.2384	17.3424	15.2919	11.4509	29.3717
360.2	22.3611	29.4292	25.014	25.6368	23.8875	28.3407	17.4461	15.263	11.4022	29.3908
360.65	22.2728	29.432	24.9756	25.609	23.9178	28.3928	17.5775	15.2446	11.3587	29.3923
361.1	22.3719	29.3402	24.9532	25.6051	23.946	28.4557	17.6829	15.2415	11.3903	29.4476
361.55	22.4778	29.3412	24.8594	25.6584	23.9396	28.4269	17.7639	15.268	11.4547	29.4489
362	22.5359	29.3116	24.8046	25.7005	23.8967	28.3593	17.721	15.2764	11.5328	29.4288
362.45	22.6534	29.2972	24.7635	25.7105	23.846	28.313	17.6587	15.2771	11.5445	29.3966
362.9	22.7016	29.3259	24.7407	25.6297	23.8235	28.2571	17.5459	15.2994	11.5112	29.3076
363.35	22.7546	29.3441	24.7453	25.5267	23.7932	28.2399	17.4386	15.2853	11.4549	29.256
363.8	22.7564	29.3613	24.7768	25.4346	23.7787	28.2346	17.3821	15.25	11.4238	29.1897
364.25	22.7399	29.3689	24.8153	25.388	23.7859	28.2267	17.3476	15.2249	11.4539	29.0988
364.7	22.7047	29.3575	24.8412	25.4886	23.7455	28.2049	17.3662	15.1627	11.4805	29.0341
365.15	22.6377	29.3221	24.9007	25.5768	23.7364	28.1702	17.3922	15.1125	11.4878	28.9317
365.6	22.666	29.3192	24.9303	25.6645	23.7444	28.1638	17.4404	15.113	11.5309	28.8495
366.05	22.6543	29.3154	24.9399	25.7539	23.7321	28.17	17.4749	15.0815	11.5774	28.8971
366.5	22.6225	29.3336	25.0329	25.781	23.7736	28.198	17.4864	15.0624	11.6157	28.9409
366.95	22.6028	29.3709	25.1028	25.8306	23.7971	28.2197	17.5	15.0382	11.6594	29.0325
367.4	22.5511	29.3919	25.1779	25.8504	23.7947	28.2464	17.4939	15.0223	11.587	29.1571
367.85	22.5428	29.4464	25.3005	25.793	23.8001	28.2571	17.4044	15.0409	11.4761	29.2436
368.3	22.5459	29.4445	25.2435	25.7225	23.7879	28.2611	17.3118	15.0766	11.3963	29.3281
368.75	22.5571	29.4397	25.1503	25.6364	23.7993	28.216	17.2186	15.1375	11.3623	29.3904
369.2	22.5572	29.3919	25.0487	25.5786	23.8447	28.1666	17.1564	15.1679	11.3925	29.4049
369.65	22.542	29.2743	24.903	25.5879	23.8909	28.1302	17.2402	15.1795	11.4299	29.3713
370.1	22.5567	29.192	24.869	25.6025	23.9285	28.0803	17.3121	15.1608	11.4562	29.3313
370.55	22.5626	29.0954	24.8037	25.5782	23.9068	28.083	17.3844	15.1327	11.4722	29.2911
371	22.5864	29.0782	24.7418	25.5809	23.8671	28.0678	17.4328	15.1113	11.4682	29.2365
371.45	22.5972	29.0974	24.6789	25.5405	23.8354	28.0342	17.4043	15.0483	11.5051	29.2073
371.9	22.5881	29.1452	24.5957	25.5014	23.8133	27.9972	17.3871	14.9984	11.5424	29.1881
372.35	22.6527	29.2637	24.638	25.5397	23.8351	28.0184	17.368	14.9322	11.5145	29.1833
372.8	22.6938	29.2073	24.7034	25.5462	23.8436	28.0584	17.3196	14.847	11.5099	29.1292
373.25	22.748	29.1758	24.7732	25.5366	23.8043	28.1127	17.2905	14.847	11.459	29.0227
373.7	22.7947	29.1069	24.873	25.5503	23.7502	28.1954	17.2731	14.8809	11.3966	28.9017
374.15	22.7062	28.9109	24.8792	25.5328	23.6996	28.1825	17.24	14.9303	11.3851	28.7275
374.6	22.6129	28.9759	24.8472	25.4364	23.6747	28.1713	17.2641	15.0382	11.3787	28.721
375.05	22.5408	28.9816	24.8617	25.4296	23.688	28.1882	17.268	15.1299	11.3922	28.7712
375.5	22.4794	28.9826	24.8189	25.3662	23.7172	28.2001	17.3136	15.1663	11.3846	28.8319
375.95	22.5042	29.0582	24.8254	25.2668	23.7171	28.2435	17.3886	15.2016	11.3356	28.9418
376.4	22.5298	28.997	24.851	25.3259	23.6982	28.2435	17.4263	15.1568	11.2801	28.9877
376.85	22.5295	28.9883	24.7712	25.2989	23.6878	28.1964	17.4905	15.096	11.2298	29.0123
377.3	22.5122	28.9587	24.7272	25.3223	23.7091	28.1096	17.5015	15.0629	11.2249	29.0392
377.75	22.4711	28.9214	24.645	25.4181	23.7633	28.0422	17.5089	14.9987	11.2695	29.0564
378.2	22.4614	28.8908	24.5403	25.4476	23.8137	28.0035	17.546	14.9861	11.2744	29.0253
378.65	22.4637	28.8468	24.5125	25.5379	23.8445	27.9593	17.5696	14.9653	11.2669	29.0122
379.1	22.4946	28.8669	24.4961	25.5854	23.8034	27.8737	17.5283	14.9557	11.2433	29.0016
379.55	22.5232	28.887	24.5168	25.578	23.7487	27.7594	17.4698	14.9848	11.2095	28.9692
380	22.5244	28.9434	24.5677	25.5481	23.7049	27.641	17.3701	15.0163	11.2456	28.9915
380.45	22.4974	28.9922	24.5991	25.4624	23.6931	27.5653	17.3256	15.0396	11.2759	28.9948
380.9	22.4154	29.0237	24.6156	25.42	23.6961	27.6473	17.3618	15.048	11.3126	28.9871
381.35	22.3395	29.0457	24.5864	25.3749	23.6892	27.7363	17.4018	15.0445	11.3324	28.9237
381.8	22.2939	29.0036	24.554	25.3447	23.6409	27.858	17.4888	15.0226	11.3227	28.8251
382.25	22.2726	28.9922	24.535	25.4098	23.5333	27.9595	17.4424	15.0121	11.3538	28.7383
382.7	22.3036	28.9644	24.4877	25.4608	23.4591	27.9651	17.4051	14.9976	11.3663	28.6682
383.15	22.3184	28.9453	24.4815	25.5436	23.3835	27.9959	17.3395	14.9759	11.3866	28.7865
383.6	22.2967	28.9453	24.458	25.6065	23.3939	27.98	17.261	14.9679	11.3866	28.9041
384.05	22.2548	28.9023	24.4103	25.5227	23.4549	27.9559	17.248	14.9873	11.3401	29.0017
384.5	22.2403	28.8478	24.4202	25.4304	23.4926	27.9784	17.2013	14.9982	11.3132	29.0855
384.95	22.2618	28.7952	24.4045	25.3168	23.5274	27.9679	17.1955	15.018	11.3233	29.0463
385.4	22.3096	28.7818	24.4426	25.2048	23.526	27.9745	17.1534	15.0255	11.3418	29.0192
385.85	22.391	28.7914	24.5014	25.1718	23.4698	27.9588	17.1424	14.9761	11.3511	29.0006
386.3	22.3996	28.8134	24.5147	25.1471	23.4335	27.8594	17.1451	14.9406	11.3442	28.9824
386.75	22.3903	28.8057	24.5246	25.1088	23.4254	27.8111	17.1386	14.9044	11.2693	28.9702
387.2	22.3385	28.7187	24.4748	25.1027	23.406	27.7875	17.1701	14.8643	11.2042	28.9355
387.65	22.2662	28.5838	24.4253	25.0855	23.4853	27.8393	17.1795	14.8593	11.1934	28.8785
388.1	22.2235	28.4892	24.379	25.0552	23.5432	27.9515	17.1878	14.8667	11.19	28.8006
388.55	22.1481	28.4758	24.328	25.0715	23.5654	28.0139	17.1974	14.8385	11.2125	28.7366
389	22.1315	28.5456	24.2865	25.0605	23.5969	28.0352	17.199	14.7907	11.2267	28.6699
389.45	22.0975	28.7024	24.2176	25.1145	23.5617	28.0018	17.188	14.7301	11.2181	28.6442
389.9	22.0747	28.7636	24.1699	25.1704	23.5347	27.9384	17.1959	14.6368	11.2061	28.6637
390.35	22.1233	28.7215	24.1447	25.1775	23.6087	27.8586	17.2008	14.5881	11.2154	28.6324
390.8	22.1394	28.6565	24.1569	25.2009	23.6565	27.7947	17.1694	14.5746	11.2393	28.6263
391.25	22.1805	28.5064	24.1984	25.1377	23.6871	27.7034	17.1558	14.5281	11.226	28.5843
391.7	22.2071	28.4251	24.242	25.0894	23.6994	27.639	17.1088	14.5136	11.1979	28.4979
392.15	22.1508	28.4232	24.2662	25.0873	23.552	27.6124	17.0507	14.5217	11.1276	28.4593
392.6	22.0967	28.4031	24.2252	25.091	23.4329	27.5659	17.041	14.5153	11.0379	28.4191
393.05	22.0559	28.4557	24.2142	25.1214	23.3366	27.5705	17.0245	14.5952	11.0014	28.4328
393.5	22.0585	28.4798	24.1732	25.1518	23.235	27.5613	17.0136	14.6575	10.997	28.4795
393.95	22.1132	28.4599	24.1889	25.123	23.2072	27.5271	17.0133	14.6731	11.0337	28.5217
394.4	22.1523	28.4773	24.2429	25.0649	23.1693	27.5004	16.8823	14.6969	11.0777	28.5687
394.85	22.157	28.4278	24.2398	25.0016	23.1446	27.4523	16.7759	14.6694	11.0934	28.5692
395.3	22.0934	28.4362	24.2049	24.908	23.1723	27.3784	16.692	14.6626	11.0958	28.5541
395.75	22.0618	28.437	24.1045	24.8584	23.201	27.3316	16.6041	14.6542	11.086	28.5289
396.2	22.0488	28.3844	24.0133	24.8051	23.2238	27.3121	16.7489	14.6246	11.0834	28.4695
396.65	22.0626	28.4187	23.953	24.7591	23.2372	27.2854	16.8471	14.6126	11.1075	28.3971
397.1	22.1026	28.3901	23.9892	24.7521	23.2088	27.2987	16.935	14.5754	11.1042	28.3498
397.55	22.0886	28.3986	24.0465	24.7316	23.1842	27.3062	17.0226	14.5535	11.0971	28.3064
398	22.0447	28.4205	24.0931	24.6886	23.1448	27.2977	16.9807	14.5608	11.096	28.2921
398.45	21.9734	28.3506	24.1149	24.6442	23.0886	27.3237	16.9848	14.5525	11.0779	28.3684
398.9	21.9144	28.2951	24.0905	24.5789	23.0743	27.3328	16.9852	14.5648	11.0967	28.4147
399.35	21.8361	28.23	24.0903	24.5152	23.0622	27.3261	16.9594	14.5943	11.1763	28.4727
399.8	21.8245	28.1694	24.0479	24.5804	23.0787	27.3411	16.9303	14.6129	11.2196	28.5205
400.25	21.826	28.1556	24.0035	24.672	23.1009	27.3239	16.8631	14.6329	11.2213	28.461
400.7	21.8054	28.1407	23.9573	24.7573	23.0969	27.3312	16.767	14.6565	11.2271	28.3982
401.15	21.8361	28.1296	23.8668	24.8529	23.0974	27.3297	16.7293	14.6416	11.1235	28.3295
401.6	21.8254	28.1413	23.8523	24.8215	23.0982	27.3093	16.7107	14.653	11.043	28.2752
402.05	21.8436	28.1633	23.8786	24.7481	23.2245	27.31	16.7292	14.6541	11.0134	28.2334
402.5	21.8868	28.2717	23.927	24.7328	23.3326	27.289	16.7597	14.6032	10.9616	28.2005
402.95	21.9225	28.3438	23.9828	24.6924	23.4292	27.2767	16.779	14.5903	10.9381	28.1724
403.4	21.9505	28.415	24.0139	24.7015	23.5158	27.2512	16.8013	14.5254	10.9238	28.1384
403.85	21.9272	28.4508	23.9575	24.735	23.377	27.2061	16.8302	14.5146	10.9168	28.1503
404.3	21.8826	28.3541	23.8713	24.6691	23.2495	27.1429	16.8997	14.5457	10.9048	28.1715
404.75	21.8226	28.2967	23.8026	24.6255	23.1115	27.0679	16.9487	14.5559	10.9299	28.1729
405.2	21.7638	28.219	23.7223	24.5796	22.9569	26.9906	17.0019	14.5942	10.9327	28.1638
405.65	21.7444	28.1459	23.7486	24.5112	22.93	26.9098	16.9654	14.5654	10.9049	28.1459
406.1	21.7387	28.1241	23.7566	24.4738	22.8917	26.8564	16.9311	14.5207	10.8886	28.1172
406.55	21.6752	28.0578	23.7717	24.4369	22.8734	26.8708	16.8788	14.5039	10.8754	28.0896
407	21.6549	27.971	23.7622	24.3985	22.8813	26.9089	16.7796	14.4822	10.8964	28.0937
407.45	21.6213	27.9124	23.7219	24.4091	22.8462	26.9673	16.7462	14.4638	10.914	28.0793
407.9	21.5786	27.8202	23.7312	24.4506	22.8496	27.0084	16.6461	14.4463	10.9346	28.091
408.35	21.652	27.7944	23.7039	24.4799	22.8524	26.9979	16.5651	14.3685	10.9296	28.1328
408.8	21.6862	27.7977	23.7066	24.4949	22.8555	26.9834	16.4821	14.2985	10.9022	28.1201
409.25	21.7382	27.7547	23.6838	24.4487	22.9089	26.9679	16.4098	14.2633	10.924	28.1079
409.7	21.8197	27.7738	23.6445	24.4328	22.9394	26.9589	16.3854	14.2633	10.9652	28.0563
410.15	21.8449	27.7438	23.6465	24.415	22.9601	26.9486	16.3796	14.2779	10.988	27.9816
410.6	21.8946	27.704	23.6534	24.4182	22.9746	26.942	16.4665	14.2881	10.9911	27.9234
411.05	21.9198	27.6922	23.6845	24.4807	22.9217	26.9083	16.5371	14.2767	10.9481	27.9086
411.5	21.8863	27.6398	23.7102	24.4642	22.8475	26.852	16.6365	14.2235	10.857	27.9022
411.95	21.8299	27.6248	23.7161	24.4689	22.7627	26.8092	16.7222	14.2108	10.8138	27.8769
412.4	21.7211	27.669	23.7638	24.4583	22.6756	26.7498	16.7294	14.1965	10.8071	27.8666
412.85	21.6141	27.7403	23.773	24.4039	22.6418	26.7312	16.7487	14.1984	10.8048	27.8107
413.3	21.538	27.8377	23.7705	24.389	22.6365	26.6788	16.7684	14.2056	10.8011	27.7695
413.75	21.4881	27.9039	23.7723	24.3662	22.6305	26.5895	16.7893	14.2123	10.7506	27.7462
414.2	21.4782	27.9053	23.6835	24.3362	22.6331	26.508	16.8351	14.2117	10.6851	27.7278
414.65	21.4714	27.8937	23.6554	24.2976	22.6267	26.3895	16.8738	14.2067	10.6383	27.7262
415.1	21.4616	27.885	23.6674	24.2557	22.607	26.4004	16.7886	14.2319	10.6525	27.7198
415.55	21.4899	27.8784	23.6296	24.1829	22.6231	26.4398	16.7198	14.2229	10.711	27.7192
416	21.5226	27.8566	23.6325	24.1053	22.6104	26.4696	16.6422	14.1783	10.7509	27.7216
416.45	21.5549	27.8033	23.6052	24.0683	22.6099	26.5227	16.5266	14.1206	10.7637	27.7247
416.9	21.6105	27.6923	23.5521	24.0243	22.6161	26.5213	16.5054	14.064	10.7465	27.7264
417.35	21.5832	27.575	23.5849	24.024	22.5922	26.5321	16.4115	14.0065	10.7211	27.7419
417.8	21.5278	27.4668	23.5912	24.0525	22.5903	26.554	16.3402	14.0378	10.7165	27.7363
418.25	21.4711	27.3317	23.5853	24.0067	22.5593	26.5562	16.2755	14.0794	10.7842	27.7283
418.7	21.4098	27.3466	23.5641	23.9594	22.5129	26.5532	16.2026	14.0864	10.8466	27.7308
419.15	21.4325	27.4446	23.5241	23.8695	22.4958	26.5349	16.1796	14.1071	10.8948	27.7231
419.6	21.4743	27.5855	23.5667	23.7773	22.465	26.4936	16.1247	14.0608	10.9514	27.713
420.05	21.4979	27.8228	23.6162	23.823	22.4518	26.4254	16.1566	14.0297	10.9152	27.6739
420.5	21.4918	27.8686	23.6686	23.8993	22.4785	26.3346	16.2123	14.0205	10.89	27.6155
420.95	21.4197	27.7643	23.6889	24.0117	22.493	26.257	16.3005	13.9892	10.8785	27.5634
421.4	21.3386	27.6256	23.6245	24.0808	22.542	26.2121	16.3979	13.9876	10.8593	27.5329
421.85	21.2981	27.4309	23.5484	24.0488	22.5884	26.2899	16.4544	13.9676	10.8576	27.5275
422.3	21.2702	27.3154	23.4695	23.9972	22.5828	26.361	16.4642	13.9412	10.8593	27.5291
422.75	21.2497	27.2843	23.4207	23.9481	22.5346	26.4265	16.4795	13.9589	10.8795	27.5117
423.2	21.2427	27.2532	23.3622	23.9278	22.4831	26.4876	16.5073	13.9702	10.8904	27.4847
423.65	21.2681	27.2294	23.3274	23.9274	22.4301	26.4189	16.4947	13.9786	10.9061	27.454
424.1	21.3006	27.1978	23.2698	23.9176	22.4215	26.4533	16.5205	13.9926	10.8835	27.4719
424.55	21.364	27.1782	23.1786	23.8881	22.4637	26.4665	16.4608	13.9943	10.7802	27.4971
425	21.4348	27.1705	23.1423	23.8895	22.4535	26.4614	16.4028	14.0149	10.69	27.5265
425.45	21.409	27.1607	23.0901	23.8873	22.4235	26.4951	16.3839	14.055	10.6477	27.5541
425.9	21.3751	27.1815	23.1063	23.8777	22.3656	26.3726	16.3381	14.0653	10.6368	27.4962
426.35	21.3277	27.1852	23.1232	23.8638	22.2948	26.2679	16.3428	14.0555	10.69	27.4483
426.8	21.2407	27.1878	23.143	23.6953	22.2688	26.1983	16.3219	13.9866	10.736	27.3984
427.25	21.1644	27.1879	23.1626	23.5233	22.2698	26.1393	16.2772	13.8961	10.7396	27.3652
427.7	21.0016	27.1641	23.1625	23.3814	22.2852	26.1271	16.213	13.8456	10.7234	27.3676
428.15	20.8198	27.1296	23.1141	23.2203	22.2849	26.1212	16.1505	13.8472	10.7235	27.3398
428.6	20.6772	27.1029	23.0571	23.3124	22.2634	26.0773	16.116	13.8905	10.7223	27.3204
429.05	20.5718	27.078	22.9961	23.4085	22.237	26.0629	16.101	13.9332	10.703	27.2748
429.5	20.6661	27.0794	22.9391	23.4831	22.2063	26.0928	16.1626	13.9628	10.6818	27.2504
429.95	20.7973	27.0743	23.0158	23.6328	22.18	26.1107	16.2415	13.9243	10.6126	27.2599
430.4	20.9037	27.0474	23.0613	23.6465	22.1782	26.1523	16.3155	13.8694	10.5484	27.2315
430.85	21.0464	27.0267	23.1442	23.6552	22.1761	26.1155	16.3629	13.8154	10.53	27.1981
431.3	21.0739	26.9768	23.1973	23.6837	22.1692	26.0661	16.3847	13.7534	10.5767	27.156
431.75	21.0828	26.9525	23.1964	23.6365	22.1797	26.017	16.3555	13.7081	10.6662	27.0895
432.2	21.2062	26.954	23.2099	23.5943	22.1676	25.9175	16.3456	13.6943	10.7419	27.0576
432.65	21.2695	26.9528	23.2579	23.5799	22.1347	25.9733	16.3447	13.6862	10.7799	27.0989
433.1	21.3351	26.9986	23.3155	23.5788	22.1072	26.0192	16.3076	13.6001	10.75	27.1115
433.55	21.4077	27.0718	23.3527	23.6248	22.0639	26.085	16.3245	13.5519	10.6746	27.1321
434	21.2688	27.1481	23.3818	23.6784	22.0141	26.1998	16.2756	13.4721	10.6258	27.1622
434.45	21.1501	27.2113	23.2679	23.6942	21.9948	26.1131	16.2263	13.3964	10.5979	27.1291
434.9	21.0499	27.1917	23.1544	23.6465	21.987	26.0478	16.1727	13.5055	10.5659	27.1054
435.35	20.9169	27.1222	23.0491	23.5888	21.9859	25.9391	16.0863	13.5819	10.5513	27.0736
435.8	20.9022	27.001	22.9641	23.532	22.0178	25.829	16.0526	13.6896	10.5066	27.0066
436.25	20.815	26.8926	22.9482	23.4952	22.0372	25.7833	16.0623	13.7913	10.4953	26.9545
436.7	20.7001	26.8188	22.8577	23.5081	22.0173	25.7058	16.1209	13.7665	10.5277	26.9283
437.15	20.6116	26.7521	22.7536	23.4881	21.9924	25.6675	16.1584	13.7343	10.578	26.9064
437.6	20.5041	26.7498	22.669	23.4683	21.9527	25.6212	16.1702	13.6811	10.6397	26.9091
438.05	20.543	26.7426	22.6145	23.4533	21.9075	25.5982	16.1204	13.6137	10.6306	26.8927
438.5	20.6071	26.7778	22.7016	23.4193	21.9121	25.5834	16.0447	13.5863	10.6155	26.8734
438.95	20.7049	26.8249	22.8015	23.4161	21.9288	25.5527	16.0278	13.577	10.5952	26.8783
439.4	20.8234	26.8387	22.8723	23.3852	21.9251	25.5452	16.0467	13.5869	10.595	26.8587
439.85	20.8924	26.8715	22.9505	23.4031	21.933	25.5673	16.1114	13.637	10.6451	26.8576
440.3	20.9213	26.8661	22.9678	23.4304	21.8943	25.5835	16.1798	13.6548	10.6513	26.8145
440.75	20.9099	26.8372	23.0038	23.4408	21.8282	25.6152	16.233	13.6894	10.6457	26.7514
441.2	20.8885	26.8094	23.0181	23.4829	21.7972	25.7125	16.2591	13.6965	10.6237	26.6614
441.65	20.8126	26.7523	22.9759	23.3976	21.7619	25.7777	16.2965	13.6805	10.605	26.5586
442.1	20.7807	26.6769	22.9486	23.3123	21.7499	25.8393	16.3027	13.6902	10.6145	26.5035
442.55	20.7201	26.6468	22.8825	23.2189	21.7637	25.8949	16.2639	13.6557	10.6071	26.4707
443	20.6674	26.6207	22.8536	23.123	21.7534	25.7784	16.198	13.6207	10.5744	26.5476
443.45	20.6631	26.6037	22.8439	23.1052	21.7193	25.6503	16.0618	13.5881	10.4879	26.6351
443.9	20.6344	26.6408	22.8079	23.0864	21.6973	25.5332	15.9725	13.5419	10.415	26.7015
444.35	20.6522	26.6369	22.7628	23.1166	21.6918	25.3975	15.9542	13.5162	10.3838	26.7322
444.8	20.6531	26.6469	22.6783	23.1316	21.6733	25.3364	15.9684	13.5191	10.3894	26.7033
445.25	20.6235	26.6565	22.6136	23.1328	21.6885	25.3095	16.028	13.5229	10.3515	26.6954
445.7	20.6106	26.6523	22.5504	23.1185	21.6939	25.2994	16.0607	13.5109	10.2755	26.7008
446.15	20.6171	26.6635	22.5371	23.0795	21.6547	25.3116	16.0149	13.503	10.1747	26.7164
446.6	20.6243	26.6446	22.5925	23.0674	21.6685	25.3358	15.9361	13.4654	10.0673	26.7136
447.05	20.6525	26.6541	22.639	23.1257	21.6798	25.3474	15.818	13.424	10.1273	26.6814
447.5	20.6802	26.6111	22.6728	23.2055	21.7212	25.3958	15.7304	13.4296	10.2455	26.6244
447.95	20.6692	26.5603	22.7009	23.271	21.7694	25.4352	15.6959	13.4651	10.341	26.6453
448.4	20.6766	26.5135	22.6069	23.3188	21.74	25.4439	15.7413	13.5104	10.4258	26.6826
448.85	20.6965	26.4161	22.5062	23.2334	21.694	25.4594	15.8221	13.5625	10.4138	26.7377
449.3	20.7178	26.3326	22.4552	23.122	21.6009	25.3953	15.8614	13.5739	10.3671	26.8147
449.75	20.7191	26.2768	22.3705	23.0128	21.5575	25.3102	15.8813	13.5266	10.3725	26.7553
450.2	20.6971	26.3436	22.4465	22.9276	21.5736	25.2616	15.8541	13.4864	10.3526	26.6982
450.65	20.6302	26.4365	22.5603	22.9334	21.5833	25.1846	15.8523	13.4432	10.3262	26.5917
451.1	20.541	26.5819	22.6535	22.9733	21.5968	25.1342	15.8042	13.4134	10.2765	26.5057
451.55	20.4946	26.683	22.7798	23.0144	21.5667	25.1261	15.772	13.4027	10.2081	26.4761
452	20.4575	26.5502	22.8051	23.0004	21.5265	25.1072	15.7332	13.3725	10.186	26.4355
452.45	20.439	26.424	22.7655	22.9364	21.5275	25.0986	15.6422	13.3271	10.2094	26.4492
452.9	20.4525	26.2737	22.8055	22.851	21.5528	25.0955	15.6715	13.3112	10.2867	26.425
453.35	20.4547	26.1333	22.805	22.7928	21.5899	25.065	15.6928	13.2804	10.3432	26.4294
453.8	20.4575	26.1502	22.8175	22.794	21.6092	25.0393	15.7224	13.2852	10.3763	26.46
454.25	20.4574	26.1655	22.8789	22.8234	21.6018	25.0263	15.7808	13.3243	10.3689	26.4928
454.7	20.4318	26.1732	22.7408	22.8441	21.5474	25.0047	15.8032	13.3283	10.3215	26.5282
455.15	20.4063	26.2062	22.6434	22.8364	21.4547	25.0087	15.8312	13.4046	10.303	26.5033
455.6	20.3972	26.1894	22.5656	22.8169	21.382	25.0216	15.853	13.4366	10.2976	26.4469
456.05	20.3941	26.1792	22.4534	22.8136	21.2931	25.036	15.8767	13.4273	10.3046	26.3683
456.5	20.4232	26.1666	22.4447	22.8459	21.2406	25.0439	15.8461	13.4064	10.3374	26.2953
456.95	20.4364	26.1463	22.4359	22.9114	21.2457	25.0075	15.7901	13.3255	10.3405	26.277
457.4	20.4136	26.1491	22.4139	22.9311	21.2349	24.9754	15.7452	13.2849	10.3526	26.3089
457.85	20.3975	26.1184	22.4267	22.9207	21.2251	24.9298	15.6832	13.2637	10.3512	26.3294
458.3	20.3188	26.1025	22.4474	22.8749	21.2436	24.8681	15.66	13.2575	10.3325	26.3774
458.75	20.2598	26.0572	22.4445	22.7749	21.2602	24.8277	15.6699	13.2497	10.3247	26.4127
459.2	20.2233	25.9984	22.4483	22.6872	21.3136	24.7544	15.6546	13.221	10.2678	26.3693
459.65	20.1962	25.9615	22.4386	22.6262	21.4032	24.6886	15.6603	13.1911	10.2195	26.3476
460.1	20.2277	25.8947	22.4685	22.5505	21.4405	24.6773	15.6531	13.1999	10.1895	26.2892
460.55	20.255	25.8773	22.4772	22.4995	21.4614	24.6737	15.6643	13.2195	10.192	26.2001
461	20.2498	25.8361	22.48	22.4684	21.4197	24.6966	15.7104	13.2571	10.2689	26.1117
461.45	20.2248	25.7935	22.4855	22.4396	21.3784	24.7175	15.7394	13.2928	10.3388	26.0381
461.9	20.1684	25.7831	22.4189	22.4617	21.3596	24.7063	15.8103	13.2742	10.3616	25.991
462.35	20.0757	25.7526	22.3808	22.5138	21.3123	24.7096	15.8015	13.2706	10.3424	25.9869
462.8	20.0647	25.8034	22.3411	22.5784	21.2975	24.7001	15.7898	13.2359	10.2785	26.0416
463.25	20.0491	25.8764	22.2941	22.6308	21.2351	24.6883	15.769	13.2197	10.2309	26.0317
463.7	20.0409	25.9233	22.2652	22.6745	21.2838	24.6803	15.6931	13.2125	10.3244	25.9788
464.15	20.0797	26.001	22.239	22.7036	21.3728	24.652	15.6608	13.1911	10.4351	25.9023
464.6	20.0509	26.0553	22.1649	22.7	21.4765	24.6189	15.5993	13.1996	10.5299	25.8305
465.05	20.0553	26.1074	22.0703	22.686	21.5957	24.5931	15.5697	13.1821	10.6423	25.8108
465.5	20.0589	26.1283	22.0027	22.6619	21.4966	24.5915	15.5436	13.1957	10.567	25.8381
465.95	20.0602	26.0846	21.9505	22.6024	21.3588	24.5766	15.5203	13.2082	10.4856	25.8986
466.4	20.089	25.9608	21.9955	22.5775	21.2047	24.5656	15.5114	13.201	10.433	25.9266
466.85	20.0729	25.7879	22.0969	22.5809	21.0697	24.5428	15.5156	13.1862	10.3129	25.9595
467.3	20.0739	25.7039	22.1794	22.5802	21.0392	24.4939	15.5565	13.1496	10.2302	25.9862
467.75	20.0574	25.6531	22.2394	22.6027	21.0498	24.4551	15.6051	13.1073	10.1529	25.9868
468.2	20.0377	25.6559	22.2484	22.5855	21.0483	24.4286	15.673	13.0808	10.0855	26.014
468.65	20.0509	25.6997	22.2541	22.595	21.013	24.4172	15.6792	13.0787	10.0827	25.9933
469.1	20.0345	25.722	22.2697	22.6276	20.9726	24.4094	15.6888	13.0456	10.1415	25.9417
469.55	19.9859	25.6867	22.2812	22.6838	20.905	24.4074	15.6872	13.0312	10.1761	25.9981
470	19.9238	25.6452	22.2961	22.7808	20.8846	24.3993	15.6942	12.9876	10.1769	26.0291
470.45	19.853	25.5739	22.2407	22.7736	20.8994	24.3746	15.7317	12.9438	10.1377	26.097
470.9	19.818	25.4685	22.1896	22.7473	20.9447	24.3579	15.7301	12.9458	10.0871	26.1861
471.35	19.8682	25.4587	22.155	22.6626	21.0073	24.3754	15.7324	12.9658	10.0908	26.0685
471.8	19.9058	25.4486	22.1348	22.5514	21.0123	24.3937	15.6614	13.0083	10.1205	25.9384
472.25	19.9491	25.4737	22.1706	22.5139	21.0273	24.4264	15.6132	13.0622	10.1667	25.8275
472.7	19.9746	25.5173	22.1638	22.3621	21.0063	24.4285	15.5565	13.1129	10.1967	25.7079
473.15	19.9367	25.5185	22.1054	22.2637	20.9869	24.3698	15.5104	13.0381	10.1942	25.6892
473.6	19.9662	25.5585	22.0393	22.195	21.0156	24.3112	15.502	12.9715	10.1952	25.709
474.05	19.9628	25.5853	21.9336	22.09	21.0236	24.2534	15.4628	12.86	10.2078	25.701
474.5	19.9401	25.6159	21.8729	22.1986	21.0312	24.219	15.4838	12.7351	10.2364	25.7076
474.95	19.9407	25.6428	21.9074	22.2756	20.9972	24.2311	15.4577	12.789	10.2277	25.681
475.4	19.8467	25.6011	21.9055	22.32	20.93	24.3026	15.4569	12.8419	10.1794	25.6512
475.85	19.8229	25.5546	21.948	22.393	20.8473	24.3614	15.4828	12.9508	10.1196	25.6964
476.3	19.8261	25.4962	21.9963	22.3531	20.8047	24.426	15.4695	13.0589	10.0524	25.7464
476.75	19.8098	25.448	21.9824	22.3207	20.8079	24.4523	15.5356	13.082	10.0312	25.8354
477.2	19.8439	25.4509	21.9104	22.2943	20.81	24.345	15.5821	13.0651	10.0838	25.9043
477.65	19.7896	25.4548	21.8364	22.25	20.8358	24.2502	15.5903	13.0134	10.1434	25.8521
478.1	19.6861	25.4556	21.7282	22.2108	20.848	24.172	15.597	12.9171	10.1861	25.8226
478.55	19.5954	25.4622	21.6301	22.192	20.8521	24.1092	15.5636	12.8067	10.2432	25.7857
479	19.514	25.4147	21.7022	22.196	20.8743	24.0978	15.5236	12.7348	10.2285	25.7728
479.45	19.4874	25.302	21.7503	22.1933	20.8033	24.0982	15.5599	12.6553	10.2303	25.839
479.9	19.5647	25.0897	21.834	22.223	20.6935	24.054	15.5743	12.6547	10.26	25.852
480.35	19.6495	24.8113	21.9391	22.2186	20.5779	24.0065	15.577	12.6905	10.2455	25.8805
480.8	19.7141	24.6767	21.9936	22.1762	20.4762	23.9859	15.6082	12.7245	10.2509	25.8378
481.25	19.7677	24.7132	22.0379	22.1853	20.5555	23.9244	15.5299	12.7909	10.1998	25.7454
481.7	19.7367	24.9567	22.16	22.1723	20.6702	23.9123	15.509	12.8511	10.1738	25.6424
482.15	19.7367	25.3019	22.2574	22.2017	20.7875	23.9141	15.4989	12.8889	10.1771	25.5011
482.6	19.7451	25.4767	22.333	22.251	20.8619	23.9276	15.455	12.9643	10.1861	25.4131
483.05	19.7503	25.4954	22.4208	22.2261	20.8314	23.9717	15.4918	13.0282	10.2296	25.35
483.5	19.7632	25.3917	22.285	22.1806	20.7884	23.9666	15.4894	13.0652	10.1813	25.3105
483.95	19.6949	25.2244	22.1144	22.1085	20.768	24.0175	15.5035	13.1164	10.1238	25.33
484.4	19.624	25.11	21.9212	21.9497	20.7633	24.0542	15.509	13.075	10.0603	25.4281
484.85	19.5608	25.0876	21.7209	21.8504	20.7809	24.0877	15.4862	13.0227	10.0205	25.5127
485.3	19.5313	25.0778	21.6714	21.7746	20.7977	24.1352	15.4896	12.9102	10.0454	25.6247
485.75	19.5556	25.0965	21.6619	21.6812	20.7657	24.058	15.4615	12.7738	10.0686	25.7019
486.2	19.5577	25.1235	21.6567	21.7774	20.7698	23.971	15.47	12.6794	10.0129	25.6327
486.65	19.5192	25.0978	21.6663	21.8504	20.7516	23.8749	15.4802	12.5947	9.90627	25.6594
487.1	19.4389	25.0946	21.6676	21.9133	20.7119	23.7815	15.4831	12.6254	9.79343	25.6586
487.55	19.3508	25.0661	21.7102	22.0319	20.6799	23.7518	15.481	12.6367	9.70651	25.6461
488	19.3149	25.0405	21.7681	22.05	20.6006	23.7275	15.4717	12.6704	9.7788	25.7161
488.45	19.3653	25.0144	21.8658	22.0605	20.5224	23.7061	15.4302	12.6768	9.87787	25.6044
488.9	19.4517	24.992	21.9441	22.0593	20.5063	23.6872	15.3879	12.6274	9.95523	25.4913
489.35	19.5234	24.9891	21.9877	22.0165	20.5087	23.677	15.3726	12.6289	10.0014	25.379
489.8	19.5596	24.9549	22.0111	21.9737	20.5103	23.6804	15.3768	12.6117	9.97589	25.2685
490.25	19.5263	24.9449	21.9488	21.9466	20.5298	23.7155	15.4412	12.6412	9.96977	25.2845
490.7	19.417	24.9098	21.8734	21.9263	20.511	23.7736	15.4923	12.6752	9.98775	25.2963
491.15	19.3327	24.8727	21.7708	21.9001	20.4941	23.8172	15.5322	12.7056	9.98335	25.3071
491.6	19.2489	24.9137	21.6747	21.8594	20.5125	23.808	15.5553	12.7186	9.97149	25.2988
492.05	19.195	24.9477	21.6278	21.7643	20.5123	23.7701	15.6247	12.737	9.93219	25.2548
492.5	19.2583	24.9907	21.6078	21.7015	20.4952	23.7754	15.6773	12.7662	9.90761	25.2449
492.95	19.2983	25.049	21.6253	21.6611	20.4726	23.7763	15.732	12.7882	9.93687	25.3237
493.4	19.3267	25.0559	21.6365	21.6361	20.4177	23.8348	15.748	12.8545	9.99224	25.375
493.85	19.3611	25.0727	21.6492	21.723	20.3754	23.8702	15.5963	12.8375	10.0478	25.4439
494.3	19.3445	25.0761	21.6308	21.7896	20.3793	23.7858	15.4702	12.818	10.0537	25.4695
494.75	19.3332	25.0447	21.5715	21.8589	20.3944	23.7122	15.3886	12.7906	10.0506	25.3708
495.2	19.4173	25.06	21.5329	21.9239	20.4338	23.6422	15.3357	12.7448	10.0267	25.3295
495.65	19.4896	25.0752	21.5032	21.9161	20.4805	23.6059	15.42	12.7637	10.0112	25.3051
496.1	19.5714	25.0975	21.5006	21.8893	20.4901	23.6245	15.4998	12.7472	10.0539	25.3068
496.55	19.6532	25.1426	21.5469	21.8373	20.4832	23.6231	15.4923	12.7213	10.053	25.3701
497	19.5931	25.1086	21.6185	21.7894	20.4911	23.5845	15.5178	12.6726	10.0319	25.3954
497.45	19.4955	25.0245	21.6952	21.7667	20.469	23.5257	15.453	12.599	10.0195	25.3885
497.9	19.3826	24.9689	21.7841	21.7416	20.4556	23.4454	15.4037	12.5632	9.991	25.3951
498.35	19.2786	24.8738	21.8412	21.7251	20.4506	23.3979	15.3726	12.5575	10.0005	25.337
498.8	19.2134	24.8222	21.835	21.7107	20.391	23.4073	15.3137	12.574	10.0274	25.287
499.25	19.1229	24.804	21.7725	21.7037	20.3633	23.4328	15.3386	12.6211	10.0277	25.2337
499.7	19.0278	24.7562	21.687	21.7467	20.3179	23.4972	15.3388	12.6653	9.98564	25.1381
500.15	18.9175	24.7644	21.6011	21.8068	20.2756	23.569	15.4067	12.6823	9.95103	25.1343
500.6	18.8477	24.7708	21.5997	21.8587	20.2739	23.5546	15.4477	12.6953	9.92234	25.1271
501.05	18.8944	24.7727	21.6243	21.8503	20.2597	23.5143	15.4609	12.6934	9.93171	25.1064
501.5	18.9459	24.753	21.6537	21.8322	20.264	23.469	15.4238	12.707	9.96537	25.1278
501.95	19.0478	24.709	21.6458	21.7818	20.2649	23.3752	15.362	12.7165	9.96805	25.1117
502.4	19.1569	24.6647	21.5639	21.7621	20.2558	23.351	15.323	12.7347	9.96547	25.1062
502.85	19.2165	24.6335	21.5005	21.7914	20.2522	23.3552	15.2611	12.7346	9.92521	25.127
503.3	19.2705	24.6631	21.4426	21.7728	20.2501	23.325	15.3272	12.6642	9.90828	25.1326
503.75	19.2626	24.6964	21.4806	21.7423	20.2556	23.3252	15.324	12.6013	9.9275	25.1254
504.2	19.2295	24.7248	21.5446	21.6696	20.2777	23.2877	15.2546	12.5263	9.94959	25.1021
504.65	19.2116	24.7766	21.6094	21.5897	20.3024	23.2454	15.2035	12.4764	9.94443	25.0775
505.1	19.2072	24.7709	21.6698	21.516	20.3432	23.2481	15.0893	12.4778	9.89518	25.0595
505.55	19.2119	24.7677	21.6719	21.5002	20.3512	23.2436	15.0309	12.4846	9.80826	25.0656
506	19.2026	24.7545	21.6614	21.5093	20.3826	23.2476	15.1278	12.4902	9.71359	25.1136
506.45	19.1591	24.6756	21.6445	21.5236	20.391	23.2426	15.2317	12.5026	9.74534	25.171
506.9	19.0815	24.6446	21.6123	21.5723	20.3851	23.2231	15.3109	12.5208	9.79965	25.1926
507.35	19.0241	24.6079	21.5866	21.6435	20.4328	23.2301	15.3921	12.5505	9.88275	25.2189
507.8	19.0189	24.5923	21.5452	21.6887	20.3861	23.2209	15.381	12.5846	9.96795	25.2138
508.25	19.0154	24.6293	21.4958	21.7191	20.3607	23.2077	15.3278	12.5943	9.96126	25.1528
508.7	19.0691	24.6225	21.4614	21.7499	20.3182	23.18	15.2966	12.637	9.98364	25.1149
509.15	19.1114	24.6332	21.4225	21.6902	20.2378	23.1083	15.2396	12.6755	9.99387	25.0248
509.6	19.1011	24.6305	21.414	21.6537	20.1984	23.0728	15.187	12.7079	9.99368	24.9234
510.05	19.1174	24.5961	21.4044	21.631	20.1705	23.0571	15.179	12.7336	10.0003	24.8224
510.5	19.1338	24.5577	21.4696	21.5816	20.206	23.0537	15.1724	12.6569	9.97407	24.742
510.95	19.1994	24.4331	21.5488	21.6412	20.2423	23.1099	15.2099	12.51	9.94759	24.6691
511.4	19.2785	24.3661	21.6261	21.6934	20.3365	23.181	15.2494	12.379	9.95782	24.6091
511.85	19.3393	24.2981	21.7019	21.7204	20.3905	23.2578	15.2554	12.276	9.97388	24.6699
512.3	19.3525	24.2647	21.6361	21.7521	20.359	23.2966	15.2859	12.2346	10.0007	24.706
512.75	19.2686	24.3365	21.5789	21.6808	20.3174	23.2665	15.3057	12.3105	10.0363	24.8191
513.2	19.2004	24.2928	21.5179	21.6137	20.2305	23.2029	15.3003	12.3675	10.0436	24.9202
513.65	19.1352	24.2804	21.47	21.5596	20.1624	23.123	15.3788	12.409	10.07	24.9308
514.1	19.0615	24.2848	21.4826	21.5068	20.1427	23.0675	15.3995	12.4575	10.2026	24.9674
514.55	19.0445	24.2731	21.4617	21.4959	20.1219	23.0525	15.3888	12.4489	10.341	24.9507
515	19.0178	24.3323	21.4607	21.486	20.0777	23.0383	15.4013	12.4625	10.4862	24.9477
515.45	18.9555	24.4142	21.4555	21.6165	20.0362	23.0482	15.3198	12.4767	10.5962	24.9787
515.9	18.9297	24.448	21.4445	21.7823	19.9745	23.0731	15.2737	12.4585	10.4819	24.9633
516.35	18.9321	24.4511	21.4602	21.9372	19.9724	23.04	15.2728	12.4358	10.3337	24.9098
516.8	18.9239	24.4518	21.4374	22.1019	20.0132	22.9945	15.3294	12.4061	10.1959	24.8292
517.25	18.9683	24.3792	21.417	21.9897	20.069	22.9139	15.3708	12.3742	10.0597	24.7278
517.7	19.0011	24.3174	21.4374	21.8147	20.1505	22.8352	15.3996	12.3819	10.0478	24.6603
518.15	18.9812	24.2675	21.4316	21.6159	20.1809	22.8315	15.3781	12.3895	10.04	24.6616
518.6	18.9807	24.2073	21.4371	21.3645	20.164	22.832	15.2546	12.3933	10.0229	24.6136
519.05	18.9751	24.2103	21.4195	21.2907	20.1236	22.8334	15.2318	12.4094	10.0189	24.5725
519.5	18.9879	24.2319	21.3562	21.2696	20.0428	22.8449	15.237	12.4277	10.0035	24.5495
519.95	19.0111	24.2769	21.3319	21.2936	19.977	22.8318	15.2678	12.4696	10.0266	24.5073
520.4	19.0163	24.3263	21.3068	21.4067	19.9484	22.8669	15.3673	12.5108	10.0339	24.6516
520.85	19.0039	24.3313	21.3181	21.4645	19.9364	22.9087	15.3832	12.5397	10.0351	24.788
521.3	18.9584	24.3651	21.3585	21.4965	19.9376	22.9336	15.3672	12.5253	10.0134	24.8595
521.75	18.9386	24.3644	21.3691	21.5377	19.9392	22.9675	15.3511	12.4737	9.94634	24.8747
522.2	18.9479	24.3504	21.3699	21.5028	20.0407	22.9208	15.2861	12.3974	9.90245	24.7695
522.65	18.9811	24.3742	21.3392	21.5001	20.1317	22.9663	15.2767	12.3088	9.88543	24.6812
523.1	19.0483	24.3435	21.3081	21.4994	20.2499	23.0218	15.2866	12.2387	9.84536	24.6477
523.55	19.0948	24.2959	21.262	21.4731	20.3695	23.0768	15.3179	12.1898	9.83312	24.6971
524	19.1213	24.2824	21.2531	21.479	20.3118	23.187	15.358	12.1777	9.80108	24.7576
524.45	19.0868	24.2238	21.2509	21.4505	20.2776	23.1125	15.3572	12.1981	9.72755	24.7863
524.9	19.0334	24.1961	21.2169	21.4576	20.2269	23.0232	15.3453	12.2397	9.7723	24.8003
525.35	18.9805	24.2287	21.2163	21.4437	20.1711	22.9178	15.2896	12.3022	9.8335	24.725
525.8	18.8958	24.2755	21.1789	21.44	20.146	22.8187	15.2787	12.3465	9.88916	24.6337
526.25	18.8911	24.2779	21.2178	21.4598	20.0964	22.8085	15.2311	12.3872	9.9626	24.5662
526.7	18.8802	24.1584	21.2961	21.4055	20.047	22.7955	15.1907	12.4006	9.94892	24.5255
527.15	18.8604	23.9929	21.3742	21.3905	19.9925	22.7893	15.1624	12.3812	9.88543	24.5107
527.6	18.8801	23.7417	21.5081	21.3256	19.9923	22.7599	15.1138	12.3575	9.86525	24.4967
528.05	18.841	23.6266	21.5236	21.2598	19.9907	22.7431	15.1599	12.3213	9.83685	24.4712
528.5	18.8145	23.722	21.5002	21.2555	19.9967	22.7273	15.1796	12.3134	9.83905	24.3905
528.95	18.8085	23.8318	21.4585	21.2272	20.0316	22.7229	15.2078	12.3229	9.88954	24.4219
529.4	18.7825	23.9943	21.3565	21.2613	20.0977	22.7319	15.1924	12.3536	9.8947	24.4861
529.85	18.7746	24.1001	21.3229	21.3067	20.1788	22.761	15.1553	12.3574	9.91928	24.556
530.3	18.787	24.1093	21.3266	21.3141	20.2366	22.7885	15.1545	12.3383	9.92703	24.6481
530.75	18.7986	24.1439	21.3215	21.3331	20.2462	22.7703	15.1743	12.2874	9.90713	24.6604
531.2	18.8559	24.2065	21.3492	21.3366	20.1661	22.7364	15.2752	12.2264	9.94749	24.6645
531.65	18.9254	24.2553	21.3558	21.3273	20.0697	22.6824	15.3266	12.1962	9.9931	24.6686
532.1	18.9716	24.296	21.3299	21.3476	19.9807	22.6362	15.3916	12.1659	10.0268	24.6863
532.55	18.9905	24.2902	21.3457	21.3753	19.9555	22.6488	15.4046	12.1745	10.027	24.6927
533	18.9339	24.2142	21.3268	21.3737	19.98	22.6661	15.35	12.1863	9.96929	24.6849
533.45	18.8681	24.1571	21.3105	21.3715	20.0105	22.6713	15.3287	12.2051	9.90398	24.6637
533.9	18.7693	24.1038	21.3147	21.3512	20.0631	22.6763	15.2219	12.2297	9.87539	24.6088
534.35	18.7232	24.0799	21.3026	21.2818	20.0277	22.6611	15.1443	12.24	9.92396	24.5682
534.8	18.7387	24.1022	21.3826	21.2038	19.9751	22.6469	15.0998	12.2072	9.96671	24.5305
535.25	18.7698	24.0962	21.4303	21.1198	19.93	22.6412	15.0665	12.1743	9.98928	24.4967
535.7	18.8199	24.0935	21.4633	21.0364	19.8642	22.5897	15.1352	12.164	9.99416	24.4086
536.15	18.8547	24.079	21.469	21.0102	19.85	22.5125	15.2095	12.1655	9.98746	24.3027
536.6	18.854	24.0771	21.3543	21.0221	19.8625	22.4328	15.2592	12.2389	10.0275	24.1775
537.05	18.8092	24.1123	21.271	21.0687	19.8275	22.3497	15.2952	12.3003	10.1021	24.0827
537.5	18.8156	24.1356	21.2002	21.1808	19.8075	22.3822	15.3048	12.3271	10.1927	24.1979
537.95	18.7808	24.1645	21.1383	21.2839	19.806	22.4203	15.3424	12.3256	10.2676	24.3087
538.4	18.7857	24.181	21.1105	21.3662	19.7806	22.466	15.4108	12.2982	10.3177	24.4465
538.85	18.8284	24.1673	21.1006	21.395	19.8513	22.5002	15.4645	12.2654	10.3296	24.5745
539.3	18.824	24.166	21.0799	21.3055	19.9094	22.4576	15.4961	12.2094	10.3047	24.5523
539.75	18.8959	24.1726	21.0871	21.2165	19.929	22.4411	15.474	12.1772	10.2612	24.5842
540.2	18.9292	24.1735	21.1295	21.1357	19.9543	22.4026	15.4165	12.1304	10.1993	24.6278
540.65	18.9364	24.1702	21.143	21.1031	19.9065	22.3738	15.3738	12.0973	10.1659	24.669
541.1	18.9465	24.0871	21.1776	21.1472	19.8555	22.3665	15.3258	12.1329	10.1513	24.7456
541.55	18.8845	23.9827	21.2234	21.174	19.8064	22.3694	15.2938	12.1619	10.1418	24.7608
542	18.8473	23.957	21.2447	21.2661	19.7732	22.4208	15.2774	12.1981	10.1409	24.7337
542.45	18.8539	23.916	21.2841	21.3518	19.7973	22.4759	15.2353	12.2329	10.1178	24.643
542.9	18.8873	24.0109	21.3008	21.4139	19.8548	22.5163	15.2012	12.2376	10.0719	24.5259
543.35	18.9275	24.0926	21.2551	21.4886	19.9638	22.5368	15.1892	12.2523	10.021	24.4337
543.8	18.9293	23.9936	21.2236	21.4545	20.0674	22.5071	15.193	12.271	9.98851	24.3635
544.25	18.8508	23.9447	21.2097	21.3889	20.1245	22.5657	15.2632	12.2713	9.97532	24.2872
544.7	18.7479	23.8299	21.2347	21.3231	20.1427	22.6303	15.3457	12.2804	9.98383	24.2111
545.15	18.6624	23.7669	21.2978	21.2292	20.1313	22.6862	15.4151	12.2776	10.0162	24.1462
545.6	18.6152	23.8304	21.3535	21.1338	20.0991	22.7793	15.4706	12.2743	10.0481	24.0929
546.05	18.6613	23.8797	21.406	21.0554	20.0477	22.7251	15.3981	12.2791	10.0674	24.1789
546.5	18.6878	23.9528	21.4327	20.991	20.0269	22.6447	15.3288	12.2984	10.0699	24.2896
546.95	18.7078	23.9996	21.454	20.9474	19.9634	22.578	15.2549	12.3163	10.056	24.3703
547.4	18.7272	24.0288	21.4882	20.9835	19.9131	22.4805	15.1994	12.3326	10.0147	24.4397
547.85	18.7015	24.0549	21.5401	20.9957	19.901	22.435	15.2898	12.3875	9.98134	24.44
548.3	18.7469	24.0566	21.5644	21.0123	19.8526	22.4049	15.352	12.3718	9.97159	24.4454
548.75	18.7932	24.0694	21.5996	21.0599	19.9162	22.3565	15.4003	12.3732	9.95983	24.459
549.2	18.7997	24.0713	21.5935	21.0941	19.9921	22.3378	15.4009	12.3406	9.9866	24.4616
549.65	18.7927	24.0788	21.466	21.1945	20.0604	22.3154	15.341	12.2611	10.0168	24.4708
550.1	18.6929	24.0792	21.3821	21.2962	20.1504	22.3021	15.2785	12.2178	10.032	24.448
550.55	18.5966	24.0357	21.2671	21.3466	20.1039	22.3535	15.2517	12.1535	10.0396	24.4373
551	18.5618	23.9912	21.212	21.3442	20.0539	22.3998	15.2598	12.129	10.0204	24.4104
551.45	18.5704	23.9322	21.2698	21.2758	19.9913	22.4716	15.2812	12.092	9.98153	24.3537
551.9	18.6185	23.8904	21.1963	21.176	19.8795	22.5229	15.3408	12.0882	9.98277	24.3477
552.35	18.6776	23.8816	21.1363	21.1245	19.8243	22.4774	15.3648	12.055	10.0245	24.3571
552.8	18.7422	23.8738	21.0506	21.1094	19.7701	22.4923	15.3815	12.0344	10.0531	24.4625
553.25	18.7889	23.845	20.9223	21.1262	19.7263	22.4721	15.3704	12.0579	10.1085	24.5991
553.7	18.8569	23.8474	20.99	21.1871	19.7916	22.5092	15.3405	12.0957	10.108	24.6892
554.15	18.9018	23.8568	21.0992	21.2114	19.8714	22.5999	15.3347	12.2105	10.0821	24.7678
554.6	18.8713	23.8584	21.1869	21.2638	19.9136	22.5524	15.3733	12.3047	10.1189	24.7321
555.05	18.8286	23.8979	21.3158	21.2998	19.9695	22.5404	15.4214	12.3996	10.1372	24.7242
555.5	18.7874	23.8993	21.3996	21.287	19.9449	22.4853	15.5278	12.4076	10.188	24.7121
555.95	18.737	23.9123	21.4434	21.2899	19.8641	22.3968	15.627	12.3694	10.2334	24.6857
556.4	18.7141	24.0113	21.4982	21.22	19.8381	22.357	15.6522	12.3206	10.1938	24.7033
556.85	18.649	24.1139	21.4863	21.2278	19.7838	22.3086	15.6756	12.2509	10.182	24.6427
557.3	18.5595	24.1695	21.4043	21.2763	19.7459	22.239	15.5824	12.2211	10.1747	24.5925
557.75	18.5265	24.2014	21.3034	21.318	19.7872	22.2031	15.4897	12.1899	10.1562	24.5306
558.2	18.4906	24.1021	21.1906	21.4173	19.7728	22.1866	15.4298	12.1798	10.2165	24.4711
558.65	18.5413	23.9934	21.1241	21.3685	19.7716	22.1532	15.4165	12.1358	10.2073	24.3964
559.1	18.6103	23.9725	21.0972	21.3061	19.7918	22.1981	15.4491	12.1232	10.1557	24.3272
559.55	18.6391	23.9543	21.0615	21.2618	19.7873	22.235	15.5038	12.1172	10.1179	24.3115
560	18.7131	24.0155	21.0764	21.1864	19.8315	22.2727	15.5369	12.1402	10.023	24.3122
560.45	18.7424	24.0228	21.1073	21.2004	19.8788	22.3277	15.5005	12.2217	10.0009	24.3824
560.9	18.728	24.0047	21.1294	21.2129	19.8818	22.3076	15.4987	12.2906	9.98851	24.4672
561.35	18.7321	24.0101	21.2251	21.1852	19.8795	22.28	15.4543	12.3674	9.97838	24.5297
561.8	18.7178	23.9711	21.2507	21.1682	19.8523	22.2465	15.4718	12.3657	9.98497	24.5632
562.25	18.7345	23.9988	21.2192	21.1323	19.8354	22.1855	15.5421	12.317	9.97235	24.5721
562.7	18.8137	24.0104	21.2035	21.0815	19.8481	22.1285	15.5892	12.2365	10.0047	24.5629
563.15	18.8572	23.9843	21.1765	21.0703	19.8488	22.0987	15.5794	12.1219	10.0447	24.5112
563.6	18.8642	23.9953	21.2448	21.079	19.9383	22.0883	15.5049	12.0648	10.096	24.5831
564.05	18.8318	23.9896	21.3732	21.1524	20.0088	22.1312	15.3876	12.0806	10.1223	24.6681
564.5	18.7282	23.9734	21.4717	21.2353	20.0781	22.1923	15.2625	12.1362	10.1192	24.7392
564.95	18.6345	23.9915	21.5288	21.2925	20.1664	22.2347	15.2838	12.2506	10.12	24.8635
565.4	18.5702	24	21.4909	21.3266	20.0752	22.2589	15.3457	12.3302	10.1045	24.7681
565.85	18.5121	24.0068	21.4205	21.2623	19.9983	22.2272	15.4514	12.3409	10.1328	24.6808
566.3	18.536	24.0426	21.3657	21.2134	19.9278	22.1748	15.5637	12.3296	10.1521	24.6082
566.75	18.5991	24.0349	21.3325	21.1721	19.8258	22.1226	15.6143	12.2647	10.1371	24.4664
567.2	18.6386	24.0021	21.3351	21.1444	19.8341	22.0884	15.6314	12.2262	10.1391	24.439
567.65	18.6873	23.9792	21.3599	21.1487	19.8281	22.0064	15.633	12.2166	10.101	24.3958
568.1	18.6886	23.927	21.3827	21.1144	19.7807	21.961	15.6205	12.2126	10.1029	24.3706
568.55	18.7073	23.9035	21.3831	21.1602	19.7695	21.9152	15.5771	12.2442	10.146	24.4209
569	18.7426	23.9162	21.3868	21.1978	19.7654	21.8463	15.5901	12.2515	10.1889	24.4515
569.45	18.7639	23.91	21.3556	21.2591	19.7716	21.9515	15.5463	12.2419	10.243	24.4718
569.9	18.7781	23.9482	21.3371	21.3602	19.8281	22.0448	15.534	12.2217	10.2649	24.4946
570.35	18.6995	24.0005	21.3339	21.2932	19.8756	22.1355	15.5304	12.1949	10.2166	24.4953
570.8	18.6421	24.0289	21.3393	21.2175	19.8231	22.2426	15.4669	12.1559	10.1734	24.5222
571.25	18.617	24.0608	21.3516	21.1113	19.7445	22.249	15.4513	12.1395	10.1353	24.5401
571.7	18.6367	24.0528	21.3453	20.9983	19.635	22.2696	15.4389	12.1497	10.1204	24.5291
572.15	18.7188	23.9861	21.3125	21.0049	19.5246	22.289	15.4604	12.1637	10.1691	24.5471
572.6	18.7957	23.8792	21.2648	21.0269	19.5339	22.2913	15.5401	12.2679	10.184	24.5525
573.05	18.9414	23.708	21.2541	21.091	19.6136	22.2965	15.65	12.3472	10.2078	24.5793
573.5	19.0552	23.6796	21.2465	21.1781	19.7181	22.2531	15.7268	12.4202	10.2049	24.6254
573.95	19.1675	23.7323	21.3062	21.2098	19.8316	22.1986	15.7896	12.4552	10.2143	24.5923
574.4	19.2494	23.8885	21.3412	21.2263	19.9285	22.121	15.7794	12.4155	10.2531	24.5489
574.85	19.1587	24.178	21.3573	21.2279	19.9708	22.0385	15.7322	12.3803	10.1946	24.5177
575.3	19.0686	24.212	21.3921	21.2037	19.9853	22.0366	15.7027	12.3592	10.1263	24.4533
575.75	18.92	24.1957	21.3657	21.2512	19.981	22.0662	15.6659	12.3681	10.02	24.4444
576.2	18.769	24.146	21.4048	21.3251	19.9592	22.1472	15.6552	12.364	9.92071	24.4463
576.65	18.7083	24.0248	21.4432	21.3773	19.9427	22.2034	15.642	12.3739	10.0002	24.4132
577.1	18.5783	24.0147	21.4474	21.411	19.953	22.1911	15.6251	12.3082	10.0988	24.4046
577.55	18.4994	24.0143	21.4687	21.3679	19.9531	22.1592	15.6711	12.2607	10.2091	24.3905
578	18.4387	23.9737	21.451	21.3114	19.948	22.1331	15.717	12.2469	10.3044	24.382
578.45	18.3772	23.9425	21.4039	21.2727	19.8923	22.1516	15.7947	12.2516	10.2768	24.4766
578.9	18.4706	23.9152	21.3846	21.2432	19.8425	22.1844	15.8758	12.3214	10.2632	24.5818
579.35	18.5979	23.8807	21.3955	21.2382	19.8036	22.2183	15.8578	12.3712	10.2689	24.6709
579.8	18.7315	23.8362	21.3601	21.1909	19.7518	22.2136	15.8623	12.4187	10.2602	24.762
580.25	18.8547	23.8039	21.3807	21.1392	19.7869	22.1859	15.8219	12.3996	10.2741	24.6981
580.7	18.8607	23.7914	21.3936	21.12	19.7788	22.1558	15.7459	12.3843	10.2546	24.5974
581.15	18.8248	23.7932	21.3599	21.1082	19.7678	22.118	15.6668	12.3625	10.2042	24.4916
581.6	18.7689	23.827	21.4043	21.1594	19.7727	22.1132	15.5681	12.3318	10.1887	24.3896
582.05	18.7147	23.8341	21.3925	21.201	19.7588	22.1259	15.4867	12.3555	10.2045	24.362
582.5	18.7063	23.8246	21.3909	21.2022	19.7824	22.1262	15.458	12.3295	10.2344	24.3173
582.95	18.695	23.8136	21.3925	21.2289	19.8567	22.0866	15.4782	12.3209	10.2648	24.2933
583.4	18.721	23.82	21.3781	21.2191	19.9298	22.0214	15.5025	12.3064	10.2526	24.2404
583.85	18.74	23.8496	21.4242	21.2149	19.981	21.9163	15.55	12.2921	10.2182	24.1705
584.3	18.7282	23.896	21.44	21.2087	20.02	21.8339	15.5884	12.314	10.2206	24.203
584.75	18.6958	23.9427	21.4883	21.1819	19.986	21.7803	15.6352	12.3206	10.2327	24.248
585.2	18.6349	23.9652	21.4968	21.1755	19.9351	21.7693	15.6903	12.3428	10.278	24.3247
585.65	18.5914	23.9702	21.4238	21.1659	19.8222	21.8094	15.7352	12.3534	10.3096	24.4329
586.1	18.5937	23.9433	21.3768	21.1801	19.7189	21.8502	15.7716	12.3603	10.2906	24.5058
586.55	18.6451	23.8991	21.3077	21.1514	19.6373	21.9795	15.799	12.3423	10.2915	24.5535
587	18.7151	23.8687	21.2667	21.1319	19.5794	22.056	15.8466	12.3203	10.2787	24.5628
587.45	18.7832	23.8574	21.2966	21.0698	19.6497	22.0998	15.8899	12.3025	10.2905	24.5679
587.9	18.803	23.9222	21.3344	20.98	19.7067	22.1615	15.9216	12.2436	10.328	24.5081
588.35	18.7974	23.9799	21.419	20.9282	19.7914	22.1619	15.9252	12.2264	10.3302	24.4477
588.8	18.7802	23.9253	21.5101	20.8402	19.8729	22.1822	15.8342	12.2125	10.3255	24.411
589.25	18.7847	23.8714	21.5809	20.8601	19.9149	22.2404	15.7199	12.1761	10.3158	24.3433
589.7	18.8212	23.7413	21.6246	20.9233	19.9604	22.2587	15.6306	12.2157	10.299	24.3368
590.15	18.8672	23.647	21.5859	21.0009	19.9808	22.2708	15.5818	12.2437	10.3065	24.3424
590.6	18.8866	23.75	21.549	21.1277	19.9878	22.2717	15.6776	12.2682	10.3393	24.3425
591.05	18.8528	23.8143	21.5043	21.209	19.9727	22.2262	15.7808	12.3297	10.3329	24.2791
591.5	18.8063	23.8948	21.4699	21.2672	19.956	22.1648	15.8665	12.3783	10.3124	24.2122
591.95	18.777	23.963	21.502	21.3147	19.9371	22.0914	15.9246	12.4241	10.2982	24.1463
592.4	18.7694	23.9298	21.5103	21.3134	19.9312	22.0428	15.8891	12.4696	10.2769	24.0964
592.85	18.8183	23.9337	21.5026	21.3158	19.9239	22.0085	15.8951	12.5039	10.3136	24.2096
593.3	18.9137	23.9245	21.5248	21.3253	19.904	22.0306	15.9199	12.4972	10.361	24.3193
593.75	18.9665	23.9306	21.4795	21.3222	19.8836	22.0661	15.9538	12.4917	10.3615	24.4106
594.2	19.027	23.9659	21.4635	21.36	19.867	22.0612	16.0084	12.4826	10.3709	24.4898
594.65	19.0205	23.9671	21.5014	21.3604	19.8549	22.0615	16.0235	12.4366	10.3448	24.4901
595.1	18.9282	24	21.5149	21.3339	19.8784	22.048	16.0055	12.4404	10.3361	24.4606
595.55	18.8408	23.9868	21.6214	21.3253	19.9371	22.0356	15.9791	12.4457	10.3891	24.4594
596	18.7602	23.932	21.7157	21.2674	19.9724	22.0687	15.9549	12.453	10.3999	24.485
596.45	18.7297	23.9283	21.7749	21.2172	19.9708	22.1039	15.9399	12.4809	10.4157	24.491
596.9	18.7453	23.8936	21.7951	21.1949	19.952	22.1579	15.9235	12.4511	10.4175	24.5053
597.35	18.7322	23.8994	21.7178	21.1601	19.9035	22.186	15.9083	12.4015	10.3774	24.4832
597.8	18.7156	23.9158	21.64	21.143	19.8731	22.1787	15.8827	12.3356	10.3785	24.408
598.25	18.6602	23.9019	21.5528	21.1309	19.9068	22.1627	15.8563	12.2968	10.4087	24.3685
598.7	18.6029	23.9348	21.507	21.1201	19.9215	22.1126	15.8382	12.2838	10.4171	24.3481
599.15	18.651	23.9375	21.5033	21.1586	19.9298	22.0961	15.8334	12.3074	10.4363	24.3694
599.6	18.6613	23.9747	21.4836	21.2359	19.9555	22.0945	15.8264	12.3634	10.4089	24.3735
600.05	18.7123	24.0138	21.4322	21.3456	19.962	22.0423	15.8207	12.3842	10.34	24.3548
600.5	18.7581	24.0213	21.3928	21.4401	20.0234	21.9844	15.8508	12.4043	10.3123	24.2984
600.95	18.7658	24.085	21.3904	21.4437	20.0812	21.9464	15.8889	12.4015	10.3021	24.2284
601.4	18.8339	24.1123	21.4136	21.401	20.1099	21.9209	15.9396	12.3883	10.3415	24.2529
601.85	18.9802	24.137	21.5016	21.3394	20.1196	21.9992	16.006	12.4065	10.3891	24.2948
602.3	19.1217	24.1593	21.5374	21.305	20.0684	22.0783	16.0536	12.4508	10.4013	24.3989
602.75	19.2172	24.1125	21.5247	21.3211	20.0341	22.1003	16.0956	12.4871	10.4141	24.4966
603.2	19.2747	24.0522	21.4902	21.2864	19.9861	22.1033	16.1494	12.4968	10.4084	24.5446
603.65	19.1678	23.9429	21.4468	21.2681	19.9778	22.074	16.1861	12.4799	10.4312	24.5844
604.1	19.0628	23.8477	21.5194	21.2222	19.9759	22.0586	16.1974	12.4011	10.4711	24.5897
604.55	18.9846	23.7931	21.6257	21.1679	19.948	22.0679	16.1928	12.3583	10.4558	24.5929
605	18.9083	23.775	21.7278	21.2483	20.025	22.0812	16.1576	12.3872	10.42	24.6124
605.45	18.8808	23.8601	21.8232	21.2471	20.065	22.0632	16.1147	12.4273	10.3644	24.6093
605.9	18.8686	23.9297	21.7869	21.2265	20.15	22.0714	16.1121	12.5288	10.3303	24.5725
606.35	18.8622	23.9821	21.7219	21.2091	20.2856	22.0858	16.1139	12.6086	10.3711	24.513
606.8	18.8647	24.0206	21.6821	21.1027	20.2717	22.0947	16.1249	12.5838	10.4488	24.4319
607.25	18.9239	23.9861	21.6382	21.0909	20.2594	22.1301	16.1356	12.5664	10.4991	24.3871
607.7	18.9705	23.9403	21.6361	21.1373	20.1992	22.1249	16.1099	12.5271	10.4951	24.4142
608.15	19.0237	23.8904	21.6403	21.1724	20.1048	22.1152	16.0771	12.4756	10.4465	24.5107
608.6	19.0559	23.8447	21.7439	21.2475	20.0685	22.1253	16.0501	12.4871	10.4084	24.5908
609.05	19.0497	23.8239	21.8267	21.2629	20.0263	22.1225	16.0585	12.485	10.411	24.6522
609.5	19.0352	23.8326	21.9346	21.2244	20.0064	22.1205	16.0774	12.3984	10.4452	24.657
609.95	18.9765	23.8826	22.0421	21.2202	19.9772	22.1221	16.0917	12.3214	10.4749	24.5855
610.4	18.9496	23.9536	21.9444	21.2185	19.9474	22.1176	16.1243	12.2313	10.4491	24.5583
610.85	18.8877	24.0327	21.8662	21.2746	19.937	22.1005	16.1227	12.1226	10.4073	24.5334
611.3	18.8525	24.0914	21.7684	21.3709	19.9313	22.1026	16.1301	12.1814	10.399	24.5371
611.75	18.8578	24.0922	21.6822	21.4297	19.9586	22.0911	16.1805	12.2367	10.4121	24.5584
612.2	18.8547	24.0644	21.6708	21.4412	20.0161	22.0757	16.1457	12.2923	10.4317	24.541
612.65	18.9144	24.013	21.5594	21.4051	20.0607	22.0949	16.0976	12.3987	10.449	24.5342
613.1	18.9577	23.9928	21.4531	21.3634	20.0725	22.1	16.0625	12.399	10.4132	24.4939
613.55	18.9777	24.0091	21.3421	21.3475	20.0645	22.1137	15.9762	12.4138	10.3624	24.4881
614	19.0069	24.0287	21.2575	21.3561	20.0356	22.1367	16.0418	12.4206	10.3706	24.5026
614.45	19.0154	24.0725	21.3753	21.3506	20.0016	22.1207	16.1397	12.4285	10.407	24.4786
614.9	19.028	24.0846	21.4918	21.3116	19.9926	22.1285	16.1843	12.475	10.472	24.4793
615.35	19.0447	24.0884	21.6134	21.2881	20.0281	22.1478	16.2488	12.5003	10.5475	24.4647
615.8	19.0379	24.0854	21.7289	21.2851	20.0365	22.1502	16.2001	12.5421	10.5551	24.4616
616.25	19.0267	24.07	21.7661	21.3437	20.0694	22.1728	16.1704	12.5178	10.5456	24.4976
616.7	18.9963	24.0645	21.7937	21.4372	20.1046	22.1607	16.1861	12.4909	10.5311	24.5741
617.15	18.988	24.0551	21.8151	21.4697	20.0525	22.1999	16.1894	12.4888	10.5331	24.6502
617.6	19.0168	24.0677	21.8263	21.4708	20.0511	22.2296	16.2088	12.4974	10.5808	24.704
618.05	19.0763	24.0665	21.8001	21.4245	20.0562	22.2431	16.1738	12.5545	10.622	24.7422
618.5	19.1618	24.0943	21.8003	21.3468	20.0517	22.2748	16.1201	12.5736	10.6301	24.7061
618.95	19.2299	24.1683	21.782	21.2819	20.099	22.1875	16.0801	12.606	10.6144	24.7009
619.4	19.2297	24.1161	21.7798	21.2557	20.1228	22.1258	16.0676	12.6252	10.5766	24.7073
619.85	19.1823	24.048	21.7979	21.258	20.129	22.106	16.0907	12.6444	10.5298	24.7054
620.3	19.1412	23.9431	21.7845	21.2817	20.1558	22.1148	16.1226	12.6936	10.5239	24.75
620.75	19.0974	23.7273	21.7997	21.3626	20.2071	22.1869	16.1732	12.6923	10.5071	24.7036
621.2	19.098	23.7375	21.7092	21.3959	20.2547	22.2549	16.2241	12.6797	10.4958	24.6344
621.65	19.12	23.8114	21.5809	21.4029	20.2835	22.2898	16.1959	12.6551	10.5001	24.5888
622.1	19.0767	23.8863	21.4798	21.4215	20.3044	22.2716	16.1775	12.6095	10.4997	24.5345
622.55	19.0562	24.066	21.3557	21.4083	20.2601	22.2284	16.1441	12.5598	10.5188	24.537
623	19.034	24.1183	21.436	21.4189	20.1767	22.1733	16.0604	12.5247	10.6243	24.564
623.45	19.0171	24.1573	21.5567	21.4534	20.1218	22.1297	16.1339	12.4737	10.6939	24.5639
623.9	19.0865	24.1749	21.6337	21.4688	20.0491	22.1081	16.2032	12.4313	10.7536	24.5651
624.35	19.1235	24.1493	21.7403	21.4448	19.9776	22.1121	16.2647	12.4485	10.8282	24.5763
624.8	19.1497	24.1501	21.7256	21.4238	19.9995	22.1041	16.3941	12.4653	10.745	24.5952
625.25	19.18	24.0939	21.6848	21.3639	19.9859	22.0893	16.3966	12.5081	10.7126	24.6712
625.7	19.1787	24.0963	21.6971	21.2898	19.9819	22.0407	16.4012	12.5795	10.6525	24.7368
626.15	19.1922	24.0996	21.6927	21.2776	20.0395	21.9798	16.3903	12.6037	10.5553	24.8155
626.6	19.2324	24.0924	21.7057	21.2737	20.0454	21.9602	16.4166	12.5921	10.5173	24.8669
627.05	19.2279	24.1338	21.7664	21.2847	20.0104	21.931	16.4606	12.5888	10.4704	24.8461
627.5	19.2216	24.121	21.7835	21.3174	19.9915	21.9881	16.487	12.5569	10.4379	24.765
627.95	19.2178	24.1374	21.7766	21.3159	19.9513	22.0551	16.5453	12.5503	10.4312	24.6444
628.4	19.1933	24.1375	21.7832	21.2914	19.8805	22.0858	16.4427	12.5914	10.4457	24.5487
628.85	19.2223	24.1358	21.7144	21.2993	19.952	22.1101	16.3898	12.6001	10.4289	24.4744
629.3	19.2321	24.1695	21.684	21.3157	20.0037	22.0515	16.3541	12.6021	10.4815	24.411
629.75	19.2528	24.1585	21.6975	21.339	20.0306	21.9837	16.3209	12.5918	10.549	24.3666
630.2	19.3024	24.1817	21.7066	21.3745	20.1127	21.9395	16.3794	12.5644	10.6292	24.3162
630.65	19.2943	24.185	21.7715	21.3871	20.1164	21.9323	16.4086	12.5522	10.7258	24.2605
631.1	19.3033	24.1641	21.8317	21.429	20.1188	21.9458	16.3753	12.5643	10.761	24.3564
631.55	19.3022	24.1838	21.8753	21.4623	20.1396	21.9613	16.3036	12.5391	10.7539	24.4394
632	19.2431	24.1921	21.9076	21.4708	20.1522	21.9886	16.2235	12.5296	10.7006	24.5066
632.45	19.2497	24.2271	21.9227	21.501	20.1718	21.9891	16.123	12.5302	10.6687	24.6039
632.9	19.2683	24.2922	21.9728	21.4479	20.2004	22.0264	16.1585	12.5085	10.6448	24.616
633.35	19.2538	24.3161	21.9919	21.4517	20.2388	22.0827	16.2168	12.5558	10.6332	24.6506
633.8	19.2869	24.308	22.0201	21.4883	20.2326	22.0902	16.2842	12.5756	10.6525	24.6935
634.25	19.3009	24.2273	22.0522	21.4936	20.2157	22.0664	16.4012	12.5927	10.64	24.7116
634.7	19.3323	24.0895	21.9854	21.5339	20.1972	22.048	16.4126	12.6138	10.6152	24.7293
635.15	19.4151	24.0434	21.9631	21.4955	20.1628	22.0265	16.4561	12.6292	10.6281	24.7286
635.6	19.4675	24.0374	21.925	21.5006	20.1588	22.0432	16.5019	12.6391	10.63	24.7442
636.05	19.4789	24.1196	21.9083	21.534	20.1562	22.1456	16.5662	12.6444	10.657	24.7809
636.5	19.4138	24.2827	21.9272	21.6062	20.1668	22.2028	16.6339	12.6682	10.6993	24.7861
636.95	19.3431	24.322	21.9145	21.706	20.1787	22.2282	16.668	12.6542	10.6842	24.7875
637.4	19.296	24.3192	21.8767	21.7095	20.1852	22.2238	16.7152	12.6619	10.6697	24.7678
637.85	19.3007	24.3043	21.8014	21.6862	20.1914	22.1749	16.6569	12.6529	10.6544	24.7898
638.3	19.3651	24.2302	21.7636	21.6045	20.1863	22.1355	16.6314	12.6463	10.6489	24.8335
638.75	19.3882	24.1994	21.7429	21.4948	20.1798	22.1367	16.6168	12.6353	10.7197	24.8841
639.2	19.4728	24.1999	21.7782	21.4343	20.1899	22.1653	16.5693	12.6083	10.813	24.925
639.65	19.5415	24.1715	21.8432	21.3969	20.1956	22.1925	16.5609	12.5929	10.8944	24.8767
640.1	19.5888	24.178	21.8713	21.4101	20.1814	22.2123	16.5792	12.5556	10.9482	24.8175
640.55	19.652	24.181	21.8964	21.4772	20.1944	22.2007	16.4536	12.5503	10.9278	24.7609
641	19.5559	24.1548	21.8987	21.5158	20.1973	22.1773	16.3542	12.5819	10.8796	24.7416
641.45	19.4466	24.1278	21.8744	21.549	20.2331	22.1567	16.281	12.6468	10.8541	24.7421
641.9	19.3744	24.0664	21.8557	21.5657	20.2282	22.1702	16.1432	12.7185	10.8498	24.767
642.35	19.338	24.0497	21.8486	21.5596	20.1894	22.1968	16.2516	12.7757	10.8568	24.8082
642.8	19.4215	24.1035	21.8459	21.6132	20.1467	22.1917	16.3326	12.8105	10.8583	24.8123
643.25	19.449	24.1642	21.8705	21.6481	20.0615	22.1849	16.4221	12.7866	10.8207	24.8273
643.7	19.3921	24.2734	21.9363	21.6701	20.1	22.1436	16.5322	12.7807	10.7872	24.8232
644.15	19.296	24.328	21.9964	21.6916	20.1442	22.0968	16.5374	12.7758	10.7744	24.7886
644.6	19.1241	24.3146	22.0723	21.6282	20.1788	22.1281	16.5677	12.756	10.783	24.7688
645.05	19.0938	24.3073	22.1281	21.5793	20.2432	22.1541	16.5782	12.7612	10.7998	24.7397
645.5	19.1508	24.2372	22.1303	21.5011	20.2348	22.189	16.5854	12.7375	10.7924	24.7187
645.95	19.2318	24.1998	22.1069	21.4318	20.2352	22.2366	16.5755	12.7167	10.7724	24.7129
646.4	19.3994	24.177	22.0573	21.4349	20.2508	22.2703	16.5544	12.7082	10.7557	24.7505
646.85	19.4976	24.1514	22.0328	21.4358	20.2475	22.316	16.5154	12.7205	10.7326	24.809
647.3	19.5501	24.1608	22.0457	21.4671	20.281	22.3531	16.481	12.7259	10.7128	24.8586
647.75	19.6464	24.145	22.0962	21.4944	20.3156	22.3633	16.4634	12.7379	10.6911	24.9234
648.2	19.6922	24.1464	22.1413	21.5209	20.3244	22.307	16.4555	12.7525	10.6553	24.9159
648.65	19.7028	24.1412	22.1577	21.547	20.3365	22.2403	16.4925	12.728	10.6569	24.9118
649.1	19.7274	24.1715	22.123	21.6167	20.2895	22.2211	16.5621	12.6973	10.6733	24.8999
649.55	19.654	24.2518	22.0663	21.6526	20.2055	22.2054	16.6515	12.6517	10.7123	24.8803
650	19.5981	24.3164	22.016	21.6321	20.1505	22.2217	16.6725	12.6033	10.7565	24.8964
650.45	19.5855	24.3917	21.9761	21.6014	20.1094	22.2246	16.6742	12.5877	10.7637	24.9015
650.9	19.5736	24.4209	22.0071	21.5024	20.1122	22.1702	16.6248	12.6231	10.7451	24.9167
651.35	19.5985	24.3585	22.0388	21.4634	20.1772	22.2293	16.5218	12.6587	10.7144	24.9035
651.8	19.6057	24.3192	22.0744	21.4418	20.2486	22.3043	16.5752	12.6933	10.6896	24.8801
652.25	19.6026	24.2712	22.1152	21.4312	20.3085	22.4061	16.6418	12.7056	10.692	24.852
652.7	19.5954	24.2162	22.108	21.4526	20.3318	22.5354	16.7456	12.7111	10.7397	24.8462
653.15	19.5852	24.273	22.0125	21.4456	20.3293	22.4839	16.8794	12.7637	10.7698	24.8604
653.6	19.5911	24.3041	21.9163	21.4857	20.222	22.4193	16.876	12.8132	10.7845	24.9014
654.05	19.6016	24.352	21.8122	21.5254	20.1124	22.3417	16.8432	12.9034	10.7978	24.9685
654.5	19.6114	24.4269	21.7031	21.6157	20.0501	22.2659	16.8085	12.9629	10.7993	24.9766
654.95	19.6549	24.4306	21.7772	21.6856	19.9639	22.2735	16.8609	12.9497	10.8324	25.0023
655.4	19.6631	24.4359	21.8635	21.6946	20.0698	22.2885	16.955	12.9231	10.8556	24.9637
655.85	19.6251	24.4102	21.9575	21.7146	20.1774	22.3021	17.0362	12.8736	10.8381	24.9017
656.3	19.5944	24.3468	22.1291	21.6445	20.2498	22.3063	17.0816	12.813	10.793	24.9003
656.75	19.5173	24.3017	22.2172	21.6147	20.372	22.3159	16.9505	12.7659	10.7449	24.8534
657.2	19.4735	24.2649	22.3031	21.6389	20.3966	22.3133	16.8245	12.7569	10.7394	24.9344
657.65	19.4789	24.2448	22.3827	21.6317	20.4367	22.3334	16.7519	12.7343	10.7645	25.0125
658.1	19.4949	24.2509	22.3796	21.6578	20.4846	22.3629	16.7066	12.7126	10.7883	25.0584
658.55	19.5086	24.2453	22.3672	21.6219	20.4957	22.3772	16.7533	12.7106	10.7695	25.1367
659	19.5165	24.2446	22.3303	21.5216	20.5092	22.3914	16.7895	12.687	10.7245	25.0648
659.45	19.4854	24.258	22.2926	21.452	20.5082	22.3663	16.8059	12.644	10.7076	24.9941
659.9	19.412	24.2675	22.2881	21.3991	20.5	22.338	16.8205	12.6664	10.7274	24.9617
660.35	19.3883	24.3165	22.2627	21.4259	20.4916	22.3337	16.8451	12.6952	10.7839	24.9364
660.8	19.3819	24.3737	22.2311	21.5192	20.4463	22.3595	16.8949	12.7332	10.8411	24.9566
661.25	19.4232	24.3965	22.1919	21.6221	20.3759	22.4031	16.9263	12.8202	10.8544	24.9768
661.7	19.4979	24.436	22.1367	21.7075	20.3275	22.4303	16.9688	12.8617	10.8376	24.9496
662.15	19.5378	24.4331	22.1291	21.7268	20.2805	22.4273	16.9695	12.8962	10.819	24.9051
662.6	19.5734	24.4228	22.1641	21.7184	20.273	22.3852	16.9523	12.9249	10.8104	24.8931
663.05	19.5799	24.4683	22.2141	21.6545	20.3037	22.3392	16.9471	12.955	10.848	24.8847
663.5	19.596	24.4844	22.2484	21.5831	20.3085	22.3081	16.9508	12.9666	10.8942	24.9244
663.95	19.6316	24.5393	22.2396	21.5406	20.3382	22.2956	16.9924	12.9787	10.9356	24.9585
664.4	19.639	24.5803	22.2034	21.501	20.3664	22.2927	17.0168	12.9744	10.9674	24.9847
664.85	19.6731	24.5709	22.1906	21.5168	20.3931	22.3162	17.0194	12.9212	10.961	25.0046
665.3	19.6963	24.5545	22.2026	21.5649	20.4971	22.3418	16.9687	12.8866	10.9671	24.9665
665.75	19.6836	24.4577	22.2211	21.6289	20.6002	22.3418	16.9242	12.8475	10.991	25.0306
666.2	19.6931	24.4479	22.2596	21.6985	20.6986	22.3632	16.8749	12.8257	11.0028	25.0907
666.65	19.6974	24.4535	22.2353	21.7485	20.7691	22.3533	16.8636	12.8336	10.9835	25.1617
667.1	19.7024	24.5291	22.1912	21.7559	20.7283	22.3232	16.8758	12.8626	10.9527	25.272
667.55	19.7324	24.7004	22.185	21.7342	20.6456	22.3398	16.8668	12.8598	10.9033	25.2008
668	19.7548	24.7068	22.1636	21.665	20.5595	22.3406	16.8927	12.8647	10.8923	25.1544
668.45	19.7655	24.7259	22.1582	21.6008	20.5168	22.3317	16.8978	12.8672	10.9365	25.1032
668.9	19.7809	24.6734	22.2032	21.5619	20.5235	22.3451	16.8201	12.8458	10.955	25.0329
669.35	19.8255	24.5711	22.2788	21.5584	20.549	22.316	16.7306	12.9012	10.9481	25.0604
669.8	19.8769	24.5451	22.3618	21.6187	20.5455	22.2944	16.642	12.915	10.923	25.0354
670.25	19.9168	24.5003	22.4719	21.6658	20.4932	22.2994	16.5484	12.9163	10.8815	25.0086
670.7	19.9459	24.4778	22.5422	21.6986	20.4484	22.3085	16.6505	12.919	10.9002	24.984
671.15	19.8938	24.4828	22.4732	21.678	20.416	22.342	16.7955	12.8692	10.9496	24.9384
671.6	19.8114	24.4896	22.397	21.6507	20.444	22.3483	16.9304	12.8504	10.9662	24.9228
672.05	19.7446	24.5086	22.3321	21.6304	20.4849	22.3755	17.0647	12.8686	10.9716	24.9754
672.5	19.6682	24.589	22.2559	21.6561	20.5218	22.3838	17.0577	12.8949	10.9172	25.0386
672.95	19.701	24.6316	22.2793	21.7333	20.5464	22.3871	17.0093	12.9333	10.8756	25.1362
673.4	19.7904	24.6683	22.302	21.776	20.5363	22.4094	16.9549	12.9904	10.8677	25.2345
673.85	19.8518	24.7042	22.2961	21.8181	20.4641	22.383	16.9216	12.9874	10.8908	25.2247
674.3	19.9143	24.6551	22.3325	21.7982	20.3709	22.3531	16.9316	12.9756	10.938	25.2731
674.75	19.8835	24.6289	22.3402	21.7718	20.2681	22.3076	16.9448	12.9491	10.9497	25.283
675.2	19.8319	24.6329	22.3621	21.7545	20.1723	22.2903	16.9534	12.9601	10.9502	25.27
675.65	19.8067	24.6328	22.3777	21.7311	20.2287	22.2957	16.8999	13.0108	10.9262	25.2906
676.1	19.7946	24.6601	22.366	21.7318	20.3011	22.3271	16.8708	13.0547	10.9061	25.1937
676.55	19.8417	24.6958	22.4084	21.6837	20.4214	22.3709	16.867	13.135	10.9078	25.1066
677	19.8502	24.7076	22.445	21.6641	20.5228	22.3213	16.8794	13.0865	10.9117	25.0396
677.45	19.8591	24.7101	22.5023	21.6489	20.5331	22.2948	16.9946	13.0481	10.9108	24.9962
677.9	19.8927	24.7019	22.5235	21.6702	20.5347	22.2383	17.0644	13.0336	10.897	25.0026
678.35	19.9078	24.676	22.4549	21.7229	20.5581	22.2005	17.1181	12.983	10.889	25.0194
678.8	19.9432	24.6498	22.3731	21.7471	20.6025	22.2895	17.1505	13.0036	10.9094	25.0625
679.25	19.9839	24.6187	22.279	21.7411	20.6792	22.3352	17.1365	13.0171	10.9458	25.0619
679.7	19.945	24.6147	22.2607	21.689	20.7826	22.4194	17.1276	13.0413	10.997	25.0664
680.15	19.9065	24.6312	22.2848	21.6502	20.7584	22.4608	17.1532	13.0711	11.0308	25.0673
680.6	19.894	24.7011	22.3294	21.6134	20.7367	22.4447	17.1822	13.1147	11.0254	25.0715
681.05	19.847	24.7134	22.3369	21.6586	20.7176	22.4469	17.21	13.1301	11.0436	25.1222
681.5	19.8855	24.6894	22.2976	21.7213	20.6495	22.4113	17.28	13.0808	11.0738	25.1815
681.95	19.9056	24.6364	22.2793	21.7604	20.6568	22.4127	17.303	13.0374	11.0953	25.2551
682.4	19.895	24.4976	22.2149	21.8158	20.5907	22.3964	17.347	12.9697	11.0996	25.269
682.85	19.9077	24.5231	22.2358	21.8189	20.4679	22.3972	17.3692	12.9257	11.04	25.333
683.3	19.8598	24.5715	22.2746	21.7246	20.3854	22.4388	17.3443	12.9102	10.9626	25.3826
683.75	19.7324	24.6533	22.2639	21.6233	20.2963	22.4845	17.3158	12.9119	10.9216	25.4283
684.2	19.6101	24.7668	22.289	21.4968	20.3399	22.548	17.2704	12.9316	10.942	25.5037
684.65	19.4896	24.7643	22.2828	21.3767	20.426	22.5841	17.2747	12.9386	11.0065	25.4412
685.1	19.4161	24.7349	22.2745	21.4445	20.5097	22.5733	17.2937	12.9881	11.0722	25.3742
685.55	19.5293	24.6737	22.3007	21.5644	20.6216	22.5017	17.3199	13.0198	11.1096	25.2931
686	19.6785	24.6338	22.3398	21.721	20.6538	22.4302	17.3521	13.0426	11.1063	25.2095
686.45	19.8251	24.6344	22.3718	21.8828	20.6767	22.3631	17.3117	13.0853	11.098	25.1966
686.9	19.9671	24.6805	22.3927	21.9675	20.6915	22.3306	17.2307	13.0914	11.1455	25.2271
687.35	20.0249	24.7254	22.4416	22.0131	20.6522	22.3126	17.1661	13.0889	11.191	25.2567
687.8	20.0535	24.7488	22.4723	22.0308	20.6442	22.2773	17.0774	13.1047	11.2523	25.2985
688.25	20.0969	24.7524	22.5493	22.033	20.6194	22.242	17.0542	13.109	11.2845	25.3575
688.7	20.1332	24.7345	22.6221	21.9984	20.5911	22.1737	17.0924	13.1337	11.221	25.378
689.15	20.1607	24.7402	22.6813	21.9724	20.6092	22.1873	17.1362	13.1769	11.2014	25.4343
689.6	20.1815	24.7744	22.7446	21.9888	20.6036	22.2132	17.2131	13.189	11.1881	25.4635
690.05	20.1928	24.8078	22.7043	22.0184	20.6054	22.2615	17.2658	13.2067	11.2006	25.4384
690.5	20.1893	24.85	22.7142	22.0404	20.6088	22.347	17.3055	13.2025	11.2393	25.4351
690.95	20.1445	24.8632	22.6744	22.0467	20.5875	22.3873	17.3369	13.1902	11.2081	25.4019
691.4	20.0884	24.8309	22.635	21.972	20.5536	22.4375	17.4088	13.1826	11.1715	25.3389
691.85	20.0122	24.8068	22.6301	21.9012	20.5541	22.4721	17.482	13.1576	11.1603	25.3123
692.3	19.9281	24.7754	22.5674	21.8803	20.5757	22.4728	17.5505	13.1012	11.178	25.2547
692.75	19.9236	24.7882	22.6582	21.8849	20.6103	22.4687	17.6183	13.0364	11.2427	25.1716
693.2	19.9744	24.8518	22.7666	21.9448	20.6725	22.4793	17.5969	12.9935	11.2637	25.1698
693.65	20.0526	24.9031	22.9144	21.9981	20.6962	22.4683	17.5398	12.9574	11.2263	25.1764
694.1	20.169	24.9478	23.0575	22.0384	20.7263	22.46	17.4859	12.9504	11.156	25.2073
694.55	20.2613	24.9677	22.9805	22.0789	20.7514	22.4453	17.4377	12.9492	11.0804	25.2712
695	20.3016	24.938	22.8803	22.1424	20.7867	22.3879	17.3908	12.9352	11.0614	25.2922
695.45	20.3499	24.9044	22.745	22.1757	20.8367	22.3916	17.3976	12.9481	11.0954	25.3077
695.9	20.3703	24.8265	22.6475	22.172	20.8514	22.3598	17.4024	12.9994	11.0934	25.3152
696.35	20.3677	24.7696	22.6406	22.1307	20.8802	22.3408	17.4454	13.0607	11.0792	25.2962
696.8	20.3793	24.751	22.6281	21.9959	20.8885	22.3713	17.5543	13.0416	11.0675	25.3076
697.25	20.3313	24.7534	22.6314	21.9016	20.9036	22.3534	17.6603	12.9858	11.0204	25.3367
697.7	20.2748	24.8376	22.6076	21.8449	20.9243	22.4584	17.7539	12.9094	11.0952	25.3675
698.15	20.2289	24.8636	22.5965	21.832	20.9228	22.5408	17.7448	12.8168	11.1774	25.4268
698.6	20.181	24.8717	22.6002	21.8665	20.8928	22.5662	17.7018	12.8833	11.2117	25.4483
699.05	20.1982	24.8822	22.6068	21.8918	20.8732	22.5969	17.6162	12.9816	11.2651	25.4627
699.5	20.2319	24.8673	22.6376	21.9682	20.8537	22.5681	17.5287	13.0542	11.2429	25.4836
699.95	20.2206	24.9096	22.7124	22.0033	20.829	22.5814	17.4918	13.1427	11.2264	25.4659
700.4	20.207	24.9414	22.761	22.0645	20.8597	22.6542	17.4474	13.1494	11.2427	25.4846
700.85	20.1631	24.9386	22.8123	22.1268	20.8253	22.7226	17.3389	13.123	11.2376	25.4598
701.3	20.1191	24.9331	22.8551	22.0569	20.7928	22.7703	17.2314	13.1259	11.2219	25.3972
701.75	20.1852	24.9014	22.7931	22.0125	20.7743	22.7712	17.1308	13.0816	11.1811	25.3228
702.2	20.2706	24.8953	22.767	21.9611	20.7358	22.7312	17.0349	13.054	11.1428	25.211
702.65	20.3692	24.9349	22.7478	21.8979	20.7553	22.7029	17.1132	13.0504	11.1412	25.1287
703.1	20.4817	24.9307	22.7046	21.9425	20.7855	22.663	17.1929	13.0291	11.1737	25.0981
703.55	20.505	24.9362	22.7076	21.8901	20.8161	22.6537	17.2792	13.0828	11.2232	25.1803
704	20.5061	24.9134	22.7002	21.8201	20.8369	22.6482	17.3655	13.128	11.2495	25.2811
704.45	20.5059	24.8534	22.7572	21.7511	20.8572	22.5792	17.351	13.1624	11.2289	25.3814
704.9	20.4604	24.8669	22.8372	21.6147	20.8602	22.5546	17.3642	13.199	11.1992	25.444
705.35	20.4343	24.8571	22.9685	21.6833	20.8697	22.4951	17.3649	13.1956	11.2029	25.446
705.8	20.4274	24.8935	23.0861	21.7742	20.9013	22.4424	17.3509	13.1756	11.2191	25.4759
706.25	20.3954	24.9528	23.0218	21.8846	20.9326	22.4984	17.3418	13.2069	11.248	25.5063
706.7	20.3984	24.9774	22.9724	22.0337	20.973	22.5131	17.3209	13.2591	11.253	25.5583
707.15	20.4048	25.0601	22.8717	22.0506	20.9976	22.5617	17.3209	13.3212	11.2017	25.6084
707.6	20.404	25.1012	22.8002	22.0562	20.9917	22.595	17.3645	13.3961	11.1485	25.6353
708.05	20.415	25.1382	22.8408	22.0251	20.9698	22.5899	17.4289	13.3743	11.139	25.6796
708.5	20.4269	25.1885	22.8492	21.9809	20.9593	22.625	17.4509	13.3322	11.1519	25.6838
708.95	20.4385	25.1939	22.8456	21.971	20.9855	22.6609	17.4634	13.2895	11.1995	25.681
709.4	20.4678	25.2146	22.8235	21.975	21.0032	22.724	17.464	13.2524	11.2511	25.6404
709.85	20.5352	25.2189	22.7986	22.0134	21.0099	22.7767	17.4725	13.2721	11.2612	25.5796
710.3	20.5974	25.2325	22.7971	22.0569	21.0624	22.743	17.5518	13.2962	11.2533	25.4844
710.75	20.6688	25.1972	22.8159	22.1082	21.0651	22.6772	17.6003	13.3156	11.2306	25.3758
711.2	20.687	25.084	22.8322	22.0758	21.0801	22.5819	17.6373	13.2916	11.1923	25.309
711.65	20.6423	24.9919	22.8279	22.0288	21.1155	22.494	17.6652	13.2566	11.1793	25.2463
712.1	20.5959	24.8425	22.8277	21.9904	21.0366	22.508	17.6164	13.2023	11.1692	25.3593
712.55	20.5482	24.8222	22.8709	21.914	20.9881	22.5414	17.5953	13.1494	11.1447	25.465
713	20.5497	24.9537	22.9148	21.9612	20.961	22.5391	17.5717	13.1479	11.1595	25.5691
713.45	20.5883	25.067	22.9801	22.0284	20.9279	22.5431	17.5238	13.1494	11.1471	25.6751
713.9	20.6113	25.2031	22.9968	22.078	20.9523	22.5196	17.5382	13.1931	11.1778	25.6748
714.35	20.6098	25.251	22.9435	22.1225	20.9854	22.5026	17.5545	13.2339	11.2648	25.7226
714.8	20.5881	25.2346	22.8757	22.1166	21.0207	22.6224	17.5618	13.272	11.2772	25.7619
715.25	20.5679	25.2269	22.806	22.0785	21.0531	22.7215	17.5331	13.3069	11.2975	25.8033
715.7	20.58	25.2509	22.7969	22.0368	21.0751	22.8174	17.463	13.3136	11.2691	25.8302
716.15	20.5971	25.2945	22.8069	22.0306	21.0658	22.9264	17.4215	13.328	11.1808	25.7982
716.6	20.6189	25.2954	22.8434	22.0218	21.0308	22.9488	17.4065	13.3298	11.196	25.761
717.05	20.6454	25.3046	22.8843	22.0402	21.0064	22.973	17.4846	13.3391	11.2238	25.7048
717.5	20.6463	25.3029	22.9215	22.0897	21.0067	22.9712	17.6058	13.3299	11.2632	25.6672
717.95	20.6721	25.2897	23.011	22.149	20.9943	22.9286	17.5968	13.3007	11.3329	25.6723
718.4	20.6919	25.3117	23.0835	22.2489	20.995	22.8658	17.5907	13.2874	11.332	25.676
718.85	20.6906	25.338	23.144	22.3397	20.9955	22.806	17.5282	13.3492	11.3293	25.6458
719.3	20.6957	25.3673	23.1837	22.4051	20.9817	22.7712	17.4195	13.4247	11.3524	25.6305
719.75	20.6904	25.4038	23.1637	22.4287	21.0063	22.7522	17.4885	13.516	11.3459	25.5932
720.2	20.6718	25.4304	23.1318	22.3909	21.0268	22.7498	17.5449	13.572	11.3437	25.5495
720.65	20.666	25.4379	23.085	22.3433	21.026	22.7303	17.6214	13.4734	11.3294	25.6298
721.1	20.6804	25.4211	23.0094	22.277	21.026	22.717	17.7316	13.3866	11.2847	25.6757
721.55	20.6899	25.4188	22.9348	22.2506	21.0202	22.7055	17.76	13.3189	11.2916	25.7509
722	20.7499	25.4446	22.9034	22.2231	21.1101	22.7232	17.7792	13.2818	11.3398	25.8632
722.45	20.7981	25.4632	22.9146	22.2078	21.234	22.7774	17.8149	13.3446	11.3723	25.8879
722.9	20.8061	25.494	22.9654	22.2096	21.3704	22.7931	17.9033	13.4328	11.406	25.9336
723.35	20.8272	25.5169	23.0602	22.1715	21.5091	22.8425	18.0003	13.51	11.3486	25.9442
723.8	20.7967	25.5066	23.1332	22.1478	21.4721	22.8554	18.1059	13.5809	11.2406	25.9366
724.25	20.7984	25.5049	23.1424	22.1197	21.4176	22.8398	18.1875	13.6002	11.1812	25.9235
724.7	20.8294	25.4884	23.2352	22.1262	21.3309	22.864	18.1381	13.5798	11.127	25.8975
725.15	20.8178	25.4541	23.2809	22.1631	21.2334	22.8565	18.0555	13.53	11.1774	25.8885
725.6	20.814	25.3792	23.3066	22.2172	21.2094	22.8891	17.953	13.4878	11.2561	25.8352
726.05	20.7588	25.2884	23.3785	22.2899	21.1823	22.946	17.8527	13.4427	11.2932	25.8033
726.5	20.7124	25.2154	23.2561	22.3211	21.1842	22.9796	17.8159	13.4407	11.3539	25.792
726.95	20.7204	25.1437	23.1579	22.3066	21.1764	23.0024	17.8185	13.4663	11.3859	25.8036
727.4	20.7459	25.1671	23.0772	22.2849	21.1737	23.0038	17.8855	13.4614	11.4112	25.9221
727.85	20.8052	25.2362	23.0018	22.2178	21.1452	22.9591	17.9293	13.5279	11.3992	26.0416
728.3	20.824	25.3002	23.0136	22.1922	21.1132	22.8853	17.9783	13.5295	11.3259	26.1392
728.75	20.8078	25.3787	22.9919	22.2188	21.11	22.8561	18.0029	13.5004	11.2098	26.1864
729.2	20.7849	25.3954	22.9794	22.2212	21.1206	22.8067	17.9294	13.5	11.1031	26.1214
729.65	20.7571	25.3909	22.9819	22.2587	21.1909	22.8237	17.8912	13.4404	11.1204	26.0401
730.1	20.7611	25.405	23.0085	22.2924	21.2726	22.8435	17.8322	13.4088	11.2015	25.9806
730.55	20.7751	25.4192	23.0897	22.3253	21.3436	22.8309	17.8212	13.3945	11.3328	25.9509
731	20.8019	25.4575	23.1657	22.3932	21.4058	22.8468	17.8636	13.3907	11.4445	25.9761
731.45	20.8496	25.4869	23.1972	22.4547	21.4524	22.824	17.8989	13.4114	11.465	26.0344
731.9	20.8984	25.4786	23.2357	22.4629	21.445	22.9044	17.9507	13.4421	11.4758	26.0819
732.35	20.9537	25.478	23.2262	22.4442	21.4253	22.9701	17.9207	13.5086	11.3947	26.1215
732.8	21.02	25.4762	23.2244	22.4102	21.4033	23.009	17.8778	13.5283	11.3316	26.1427
733.25	21.02	25.5121	23.2241	22.3793	21.3325	23.073	17.8209	13.5462	11.2792	26.1179
733.7	20.9756	25.5927	23.1823	22.3839	21.3258	23.068	17.7942	13.5643	11.2015	26.0677
734.15	20.9294	25.6451	23.195	22.4135	21.3341	23.0923	17.8357	13.5245	11.2554	26.0182
734.6	20.851	25.6963	23.1674	22.455	21.3344	23.1278	17.8945	13.5063	11.3201	25.9658
735.05	20.8624	25.6884	23.1588	22.4855	21.3653	23.1442	17.9238	13.4885	11.4175	25.9545
735.5	20.9434	25.6616	23.1499	22.5034	21.3592	23.1899	17.8866	13.4654	11.53	25.9806
735.95	21.0047	25.6453	23.1102	22.5072	21.3401	23.2199	17.8164	13.4785	11.586	26.0554
736.4	21.0532	25.597	23.0678	22.4852	21.3283	23.2228	17.7243	13.4958	11.5923	26.1419
736.85	21.0591	25.5778	23.025	22.4833	21.3147	23.1699	17.7125	13.4923	11.4783	26.2106
737.3	21.0032	25.5451	23.0256	22.4933	21.3003	23.073	17.7518	13.4677	11.3534	26.254
737.75	20.9662	25.5184	23.0248	22.4483	21.2955	22.962	17.7837	13.4174	11.2215	26.2018
738.2	20.959	25.5613	23.0951	22.4154	21.2868	22.9088	17.8204	13.3858	11.1357	26.1604
738.65	20.9208	25.5965	23.1541	22.3723	21.2888	22.8487	17.8248	13.3915	11.2288	26.1305
739.1	20.9497	25.6427	23.2039	22.3001	21.3082	22.8173	17.8114	13.4354	11.3049	26.1318
739.55	21.0004	25.7166	23.2468	22.3194	21.3139	22.8255	17.8364	13.5247	11.3811	26.1776
740	21.0488	25.742	23.2547	22.3609	21.3554	22.7743	17.9971	13.5981	11.4421	26.1907
740.45	21.1442	25.7843	23.3304	22.4082	21.3714	22.8784	18.1032	13.6532	11.4273	26.1888
740.9	21.1872	25.8526	23.3842	22.4805	21.3269	22.9357	18.2379	13.6931	11.4556	26.142
741.35	21.2202	25.8994	23.4459	22.5152	21.294	22.986	18.3495	13.7026	11.5	26.1242
741.8	21.239	25.87	23.5095	22.5629	21.2048	23.1109	18.2422	13.7163	11.5281	26.1546
742.25	21.2274	25.7542	23.4691	22.5812	21.1563	23.1527	18.1934	13.7202	11.5416	26.1782
742.7	21.1968	25.6081	23.4789	22.604	21.2067	23.2367	18.0959	13.6967	11.5379	26.2174
743.15	21.1356	25.4499	23.4654	22.643	21.2675	23.2916	17.9951	13.6669	11.5107	26.2221
743.6	21.1109	25.449	23.437	22.598	21.36	23.2936	17.9861	13.6022	11.5198	26.1982
744.05	21.1097	25.613	23.4613	22.5687	21.4291	23.2623	17.9877	13.5208	11.5167	26.2005
744.5	21.1633	25.7828	23.4232	22.5332	21.447	23.2275	18.0586	13.474	11.507	26.255
744.95	21.2189	25.9462	23.3789	22.4595	21.4339	23.1876	18.1471	13.4391	11.5007	26.3192
745.4	21.2353	26.0507	23.3285	22.4409	21.4139	23.1493	18.2167	13.4676	11.462	26.3702
745.85	21.2274	26.062	23.2797	22.4375	21.3803	23.1455	18.2594	13.5272	11.4784	26.4045
746.3	21.1976	26.0587	23.2411	22.5365	21.3686	23.1114	18.2083	13.6067	11.4934	26.3451
746.75	21.212	26.0548	23.2863	22.6639	21.3652	23.107	18.1537	13.6791	11.5226	26.2522
747.2	21.2352	26.0101	23.3568	22.8105	21.354	23.0734	18.1314	13.6907	11.5635	26.1847
747.65	21.2594	25.9585	23.3992	22.9439	21.3633	23.0295	18.08	13.7005	11.5384	26.1274
748.1	21.2827	25.9246	23.445	22.8816	21.3716	23.0224	18.0894	13.6525	11.526	26.147
748.55	21.2632	25.9229	23.4235	22.8104	21.4453	23.0074	18.0563	13.6169	11.5156	26.2455
749	21.2532	25.9426	23.3774	22.7056	21.5226	23.0769	18.008	13.6069	11.5257	26.333
749.45	21.2724	25.9731	23.3176	22.5782	21.6059	23.1447	17.9737	13.6718	11.5795	26.4051
749.9	21.3081	25.9908	23.293	22.5619	21.6724	23.2065	17.9396	13.7762	11.6127	26.4533
750.35	21.3534	25.9714	23.2788	22.5543	21.6439	23.267	17.9742	13.8751	11.6264	26.4451
750.8	21.3683	25.9888	23.2818	22.5527	21.6179	23.2768	18.0202	13.9696	11.6179	26.4345
751.25	21.3637	25.9843	23.3588	22.5881	21.5749	23.3011	18.1162	13.8836	11.6032	26.4381
751.7	21.3467	25.9733	23.3976	22.5949	21.5007	23.3393	18.1802	13.7803	11.6262	26.4229
752.15	21.3402	25.9811	23.465	22.5975	21.4618	23.3796	18.2035	13.6682	11.6586	26.4376
752.6	21.3511	25.9443	23.5467	22.6002	21.4451	23.4247	18.1968	13.5741	11.6687	26.4381
753.05	21.361	25.9348	23.5784	22.6029	21.4346	23.4705	18.1749	13.5931	11.6636	26.4115
753.5	21.3552	25.9502	23.6659	22.6483	21.4843	23.4925	18.1518	13.5999	11.6457	26.4149
753.95	21.3366	25.9842	23.7107	22.6976	21.5576	23.4553	18.1327	13.5254	11.6316	26.3905
754.4	21.3303	26.0164	23.7373	22.7372	21.599	23.4247	18.1403	13.4418	11.6696	26.3956
754.85	21.3252	26.0535	23.7467	22.7577	21.6495	23.3544	18.1098	13.3582	11.7351	26.4335
755.3	21.3316	26.0839	23.6593	22.7248	21.6789	23.2813	18.1268	13.2999	11.7718	26.4159
755.75	21.3524	26.0951	23.5845	22.6771	21.5848	23.2765	18.1238	13.424	11.7794	26.3971
756.2	21.3867	26.1516	23.4943	22.6568	21.5134	23.2614	18.1236	13.5331	11.7866	26.3664
756.65	21.4118	26.1495	23.4476	22.6565	21.428	23.2941	18.136	13.6325	11.7742	26.3253
757.1	21.4486	26.1163	23.4654	22.6655	21.3229	23.3433	18.09	13.7155	11.7845	26.2741
757.55	21.4853	26.0375	23.5274	22.6814	21.4008	23.4047	18.0555	13.692	11.8235	26.2426
758	21.4947	25.9773	23.6129	22.7802	21.4675	23.4603	17.9975	13.6691	11.7972	26.2229
758.45	21.5487	25.9963	23.6743	22.8833	21.5253	23.4756	17.9808	13.6268	11.7493	26.2151
758.9	21.5742	26.0609	23.7128	23.0273	21.6034	23.4607	17.9853	13.6346	11.7044	26.3495
759.35	21.5738	26.1832	23.6446	23.1648	21.6197	23.442	18.0234	13.6373	11.6742	26.4636
759.8	21.5731	26.177	23.5636	23.1018	21.635	23.4416	18.0913	13.6657	11.6996	26.5721
760.25	21.5173	26.15	23.4907	22.9957	21.6692	23.4655	18.1102	13.7058	11.7617	26.6586
760.7	21.476	26.1095	23.43	22.8378	21.719	23.5107	18.1558	13.6946	11.785	26.6445
761.15	21.4533	26.0802	23.4796	22.6707	21.7544	23.5348	18.1594	13.7199	11.7677	26.6464
761.6	21.4399	26.1265	23.5222	22.6122	21.7826	23.5384	18.1322	13.7173	11.7406	26.6281
762.05	21.4612	26.1638	23.5412	22.5823	21.8147	23.5344	18.099	13.7445	11.6947	26.6149
762.5	21.4861	26.191	23.5629	22.5888	21.8037	23.4971	18.0736	13.7661	11.7056	26.6061
762.95	21.5034	26.1967	23.555	22.6465	21.7731	23.452	18.0611	13.7718	11.7538	26.5699
763.4	21.5316	26.1865	23.5752	22.7048	21.7246	23.4374	18.0802	13.7968	11.77	26.5394
763.85	21.538	26.1635	23.6461	22.761	21.6644	23.4247	18.1271	13.7898	11.8374	26.507
764.3	21.5473	26.162	23.7068	22.8128	21.6223	23.4853	18.136	13.8069	11.8777	26.5072
764.75	21.5894	26.1414	23.7174	22.8062	21.5981	23.5511	18.1384	13.8186	11.9029	26.5573
765.2	21.5858	26.1626	23.6991	22.8652	21.6422	23.5739	18.1208	13.8229	11.9592	26.6154
765.65	21.5914	26.221	23.6454	22.9253	21.6666	23.6033	18.0907	13.8156	11.9111	26.6062
766.1	21.5915	26.2462	23.6454	22.972	21.7	23.5815	18.0642	13.8066	11.8408	26.5458
766.55	21.5522	26.3256	23.6798	23.0669	21.7261	23.5538	18.0901	13.7777	11.7544	26.4611
767	21.583	26.3842	23.7383	23.0136	21.6909	23.5629	18.1203	13.7531	11.6767	26.3703
767.45	21.6208	26.41	23.8041	22.9836	21.7033	23.5642	18.1802	13.7513	11.6715	26.4304
767.9	21.6512	26.4695	23.8107	22.9278	21.7203	23.5895	18.2769	13.7635	11.6976	26.5169
768.35	21.6856	26.4718	23.8177	22.8479	21.7334	23.6391	18.319	13.8732	11.7257	26.6161
768.8	21.6617	26.4574	23.801	22.8415	21.7956	23.6627	18.3645	13.9518	11.6975	26.7354
769.25	21.6141	26.4437	23.7596	22.7871	21.8161	23.6987	18.3784	14.0337	11.6343	26.7786
769.7	21.5849	26.3595	23.7087	22.7674	21.7974	23.7146	18.3557	14.0603	11.5755	26.8421
770.15	21.5723	26.3094	23.6514	22.7512	21.7876	23.7107	18.3306	13.9573	11.5657	26.8868
770.6	21.599	26.2759	23.5754	22.7377	21.7628	23.727	18.297	13.8999	11.6328	26.8979
771.05	21.6202	26.2466	23.5364	22.7372	21.745	23.7089	18.319	13.8311	11.7176	26.8937
771.5	21.6125	26.3253	23.5244	22.7363	21.7822	23.7001	18.3591	13.8034	11.7605	26.8609
771.95	21.6022	26.3663	23.5188	22.726	21.8349	23.6872	18.4324	13.8215	11.783	26.8422
772.4	21.5753	26.422	23.5788	22.7395	21.8272	23.6614	18.5045	13.8314	11.7708	26.8506
772.85	21.6132	26.4971	23.6316	22.7221	21.8476	23.7023	18.4806	13.7833	11.7514	26.8662
773.3	21.6955	26.5419	23.6917	22.7297	21.8411	23.7383	18.449	13.7436	11.7861	26.8727
773.75	21.7689	26.6635	23.7548	22.712	21.8308	23.7786	18.3925	13.6973	11.7774	26.849
774.2	21.837	26.7316	23.7698	22.6606	21.8728	23.8285	18.3711	13.6449	11.7386	26.8765
774.65	21.8444	26.7746	23.7802	22.7026	21.8925	23.7966	18.3999	13.6998	11.7391	26.9237
775.1	21.8297	26.7642	23.7595	22.7	21.9581	23.7552	18.4139	13.7369	11.703	26.9885
775.55	21.8702	26.6688	23.7377	22.7539	22.01	23.7368	18.4338	13.7843	11.7064	27.0859
776	21.9205	26.6412	23.7371	22.8274	22.0588	23.7116	18.3995	13.8056	11.7676	27.0954
776.45	21.9836	26.5887	23.7119	22.8462	22.1064	23.7394	18.3453	13.7869	11.7518	27.1681
776.9	22.0582	26.568	23.7247	22.9101	22.0511	23.7835	18.3237	13.7702	11.7453	27.2253
777.35	22.0451	26.5649	23.732	22.9508	21.9888	23.7922	18.3113	13.7747	11.6959	27.2468
777.8	22.0316	26.5372	23.7313	22.9767	21.9198	23.8112	18.3336	13.8706	11.6059	27.2858
778.25	22.0249	26.5678	23.7452	22.9955	21.8226	23.8037	18.3735	13.966	11.6004	27.1742
778.7	21.995	26.5822	23.7211	22.9515	21.7874	23.7955	18.3655	14.0473	11.5914	27.0651
779.15	21.977	26.5863	23.7104	22.9246	21.7754	23.7989	18.3466	14.091	11.6429	26.9675
779.6	21.9523	26.5567	23.7062	22.8998	21.7645	23.7834	18.3236	14.0112	11.7017	26.8589
780.05	21.9113	26.5026	23.6724	22.8803	21.8119	23.7714	18.3341	13.9169	11.6901	26.8281
780.5	21.8552	26.4732	23.6411	22.9154	21.8474	23.7484	18.3773	13.8595	11.7185	26.8442
780.95	21.8339	26.4872	23.5927	22.912	21.8598	23.7463	18.4178	13.8232	11.744	26.8704
781.4	21.7908	26.5392	23.5364	22.8882	21.8821	23.7768	18.4174	13.8442	11.774	26.924
781.85	21.7804	26.597	23.6018	22.8697	21.8738	23.8018	18.3561	13.8801	11.8288	26.965
782.3	21.8198	26.6301	23.7123	22.8176	21.8674	23.8435	18.3086	13.849	11.8264	26.9651
782.75	21.8704	26.6429	23.8535	22.7756	21.8685	23.8616	18.2674	13.8361	11.7851	26.9996
783.2	21.9925	26.6583	24.0187	22.795	21.8681	23.8594	18.2942	13.8272	11.777	27.0385
783.65	22.0923	26.6722	24.0737	22.8204	21.8753	23.9624	18.2939	13.8159	11.8354	27.0894
784.1	22.1912	26.6921	24.0834	22.8353	21.8975	24.0631	18.2806	13.8975	11.9109	27.1505
784.55	22.2515	26.7122	24.0904	22.8825	21.9331	24.1825	18.2594	13.9566	11.9988	27.1592
785	22.2337	26.7014	24.0625	22.8886	21.9371	24.2841	18.2058	13.9953	12.0209	27.1241
785.45	22.2062	26.6523	24.0673	22.8991	21.9738	24.2331	18.2768	14.0316	11.9505	27.083
785.9	22.1009	26.6231	24.0969	22.9686	22.0106	24.1854	18.329	14.0126	11.9097	27.0202
786.35	22.0121	26.5932	24.0833	23.015	22.0226	24.1254	18.3184	13.9676	11.9234	26.9787
786.8	21.9445	26.6176	24.0828	23.061	22.0707	24.0651	18.3036	13.9287	11.9754	26.9942
787.25	21.9088	26.709	24.0744	23.0775	22.0563	24.0523	18.2082	13.9039	12.0603	27.0417
787.7	21.9089	26.7902	24.0524	23.0715	22.0308	24.0071	18.1185	13.8911	12.0977	27.0999
788.15	21.9277	26.8644	24.0308	23.0439	22.0208	23.958	18.1987	13.9264	12.0246	27.1444
788.6	21.9362	26.8754	23.9627	23.0268	22.0022	23.9362	18.277	13.9874	11.9582	27.1816
789.05	21.9182	26.8212	23.9209	23.0333	21.9885	23.9165	18.3629	13.9997	11.9184	27.159
789.5	21.9702	26.7266	23.8916	23.015	21.9772	23.9212	18.4755	14.0117	11.9174	27.1464
789.95	22.0047	26.6846	23.8876	23.1398	21.9564	23.9641	18.4829	13.9993	11.973	27.1445
790.4	22.0719	26.7323	23.9344	23.2606	21.9532	23.9801	18.4872	13.9692	11.9998	27.1298
790.85	22.1547	26.8295	23.9413	23.3753	22.0068	24.0183	18.4882	13.9793	12.0429	27.1399
791.3	22.158	27.0117	23.9433	23.5056	22.0451	24.047	18.4247	13.9964	12.0728	27.1365
791.75	22.1522	27.1139	23.9581	23.4132	22.1102	24.0194	18.3371	13.9958	12.1152	27.1702
792.2	22.1638	27.0905	23.9966	23.334	22.1289	24.0066	18.2905	13.9938	12.1935	27.1887
792.65	22.1752	27.0203	24.0269	23.2601	22.0902	23.993	18.2418	14.005	12.1678	27.2121
793.1	22.2373	26.8838	24.1184	23.1613	22.08	23.9769	18.2744	13.9821	12.1209	27.2388
793.55	22.2987	26.7966	24.2068	23.1471	22.0423	23.9762	18.3438	13.9938	12.0427	27.1755
794	22.3222	26.7655	24.2673	23.1159	22.0574	24.009	18.2665	13.9919	11.9368	27.1343
794.45	22.3228	26.777	24.3672	23.0762	22.0886	24.025	18.2153	13.9619	11.9146	27.0999
794.9	22.2915	26.8154	24.3244	23.0552	22.1025	24.0789	18.1302	13.9621	11.9241	27.098
795.35	22.2791	26.8192	24.2433	23.0526	22.1234	24.1281	18.0571	13.9513	11.9439	27.168
795.8	22.2573	26.8336	24.1425	23.0474	22.0888	24.1231	18.1912	13.9752	11.9592	27.2349
796.25	22.2506	26.8409	24.0284	23.0357	22.0691	24.1299	18.302	13.9764	11.9426	27.2818
796.7	22.2524	26.8397	24.0138	23.038	22.0512	24.1066	18.4423	13.9372	11.9034	27.2874
797.15	22.1969	26.8772	23.9801	23.0805	22.0719	24.1195	18.5464	13.9023	11.8969	27.2822
797.6	22.1489	26.9018	23.9827	23.1143	22.1361	24.1642	18.5382	13.8344	11.9392	27.2887
798.05	22.0953	26.9406	23.9645	23.1583	22.1913	24.2034	18.527	13.8223	11.9805	27.3243
798.5	22.0316	26.9921	23.9322	23.1809	22.2642	24.2427	18.4664	13.8618	12.0391	27.3711
798.95	22.0449	27.0111	23.9582	23.1326	22.261	24.2378	18.4289	13.9143	12.0569	27.3995
799.4	22.0832	27.046	23.9461	23.1096	22.2361	24.2169	18.4315	13.9867	12.0294	27.3945
799.85	22.1445	27.0429	23.9492	23.1014	22.2035	24.1835	18.4618	14.0444	12.0275	27.3813
800.3	22.2199	27.0263	23.9488	23.1233	22.1472	24.1443	18.5295	14.0949	12.009	27.3861
800.75	22.2712	27.0385	23.9578	23.1435	22.1091	24.1107	18.5857	14.093	12.0053	27.4131
801.2	22.2601	27.0367	23.994	23.1651	22.1042	24.0922	18.6064	14.1039	11.9899	27.4223
801.65	22.2143	27.0362	24.0645	23.1066	22.1088	24.0782	18.5339	14.0855	11.9668	27.4227
802.1	22.17	27.0215	24.127	23.0218	22.1023	24.0693	18.4295	14.0739	11.951	27.3922
802.55	22.1301	26.9963	24.1718	23.0173	22.1595	24.0996	18.3403	14.0958	11.9495	27.3398
803	22.1712	26.97	24.2038	22.9694	22.1813	24.1093	18.2565	14.0734	12.0021	27.3281
803.45	22.2299	26.9698	24.1715	23.0247	22.187	24.1288	18.3128	14.0604	12.0275	27.3096
803.9	22.2747	26.9908	24.1256	23.0882	22.2283	24.1625	18.3699	14.0244	12.0464	27.3467
804.35	22.3138	27.0058	24.0847	23.0845	22.1894	24.1602	18.3976	13.9971	12.0948	27.4066
804.8	22.3153	27.0731	24.0577	23.133	22.1218	24.1688	18.4683	14.0012	12.0923	27.479
805.25	22.3115	27.1532	24.0785	23.1593	22.0805	24.1985	18.4468	14.0626	12.1243	27.548
805.7	22.3358	27.2009	24.1114	23.0708	22.0104	24.1918	18.4546	14.117	12.1646	27.5433
806.15	22.3433	27.2715	24.1206	23.0111	21.9882	24.2117	18.4956	14.1707	12.1157	27.5296
806.6	22.3826	27.2672	24.1281	22.9171	22.0294	24.2251	18.4846	14.1914	12.0638	27.4804
807.05	22.4393	27.2293	24.1183	22.7807	22.0783	24.22	18.5123	14.1564	12.0141	27.4624
807.5	22.4594	27.2453	24.1308	22.8701	22.1332	24.2458	18.5362	14.1277	11.9979	27.4787
807.95	22.4967	27.2245	24.1775	22.9375	22.1726	24.2587	18.5418	14.0828	12.0313	27.4756
808.4	22.4746	27.222	24.2244	23.0469	22.1861	24.2864	18.5681	14.0768	12.0772	27.4911
808.85	22.4036	27.2166	24.2751	23.2368	22.1048	24.2711	18.5953	14.0305	12.067	27.497
809.3	22.3252	27.1859	24.3071	23.326	22.046	24.2048	18.6186	14.0233	11.9839	27.5075
809.75	22.2468	27.1723	24.3233	23.4187	22.0053	24.1371	18.6658	14.0262	11.8922	27.5396
810.2	22.2038	27.1827	24.3029	23.4701	21.9573	24.0591	18.7297	14.0372	11.8438	27.5605
810.65	22.2068	27.1977	24.2987	23.4273	22.0455	24.0288	18.7764	14.1336	11.8607	27.5584
811.1	22.2526	27.2226	24.2916	23.3573	22.1068	24.0629	18.7741	14.1838	11.9324	27.546
811.55	22.2912	27.2482	24.2655	23.2979	22.1555	24.0686	18.7265	14.2326	12.0143	27.5513
812	22.3447	27.2287	24.2875	23.2281	22.2359	24.0896	18.6448	14.2361	12.038	27.5947
812.45	22.3995	27.2146	24.2932	23.2124	22.2737	24.1396	18.5906	14.1994	12.0148	27.6745
812.9	22.469	27.1733	24.2956	23.2502	22.3337	24.1923	18.5976	14.1692	11.9327	27.7376
813.35	22.5106	27.099	24.3297	23.2431	22.3852	24.2799	18.6249	14.1639	11.861	27.7754
813.8	22.5167	27.0907	24.3199	23.2692	22.3939	24.3452	18.6517	14.1744	11.8268	27.773
814.25	22.5274	27.0911	24.3325	23.2714	22.3662	24.3487	18.6223	14.1949	11.8132	27.7094
814.7	22.4788	27.1045	24.3726	23.1756	22.3185	24.3319	18.5458	14.2321	11.8941	27.6633
815.15	22.5109	27.1612	24.3725	23.1739	22.2973	24.3189	18.4965	14.2268	11.9693	27.6457
815.6	22.568	27.1758	24.4139	23.1793	22.3085	24.3297	18.467	14.2571	12.0261	27.638
816.05	22.6172	27.2009	24.4154	23.1956	22.3346	24.3626	18.4791	14.2658	12.1188	27.6508
816.5	22.6944	27.2372	24.3918	23.2805	22.4357	24.3988	18.5422	14.2649	12.1546	27.7045
816.95	22.6921	27.2698	24.4124	23.3218	22.5017	24.4141	18.5758	14.2741	12.164	27.7098
817.4	22.7583	27.2999	24.4097	23.3003	22.5354	24.3921	18.5975	14.2625	12.1864	27.7202
817.85	22.819	27.2767	24.3962	23.288	22.5842	24.3468	18.6032	14.2547	12.1583	27.7884
818.3	22.8734	27.2506	24.3928	23.2784	22.4848	24.2993	18.5939	14.2431	12.1536	27.7923
818.75	22.935	27.2014	24.3518	23.2387	22.3821	24.2772	18.6064	14.2466	12.185	27.7763
819.2	22.8495	27.1685	24.3205	23.2852	22.3023	24.2787	18.6352	14.2295	12.218	27.7338
819.65	22.7376	27.1871	24.3423	23.3029	22.2184	24.2653	18.6794	14.2362	12.2524	27.6394
820.1	22.6298	27.1744	24.3917	23.3259	22.237	24.2471	18.6645	14.2337	12.2531	27.5975
820.55	22.5469	27.2232	24.4662	23.3789	22.2898	24.2081	18.6286	14.2314	12.2196	27.6228
821	22.5187	27.375	24.5225	23.357	22.3515	24.163	18.6059	14.2569	12.1622	27.698
821.45	22.504	27.4966	24.538	23.3538	22.3783	24.2139	18.5525	14.2705	12.1489	27.7957
821.9	22.5082	27.6552	24.499	23.3146	22.3734	24.2367	18.5776	14.3085	12.201	27.8535
822.35	22.5379	27.714	24.4525	23.2617	22.364	24.2728	18.6039	14.3261	12.2575	27.8994
822.8	22.5553	27.5557	24.4599	23.2471	22.3239	24.3219	18.624	14.3213	12.3165	27.8812
823.25	22.6059	27.4327	24.4997	23.2416	22.3142	24.3175	18.6782	14.2871	12.3441	27.9248
823.7	22.6148	27.2966	24.5599	23.2479	22.3431	24.3605	18.7316	14.2389	12.2895	27.9735
824.15	22.5795	27.2216	24.603	23.2712	22.3574	24.3799	18.7836	14.2019	12.2741	27.9849
824.6	22.6147	27.2614	24.6071	23.3153	22.3963	24.3927	18.7825	14.1776	12.2871	28.0554
825.05	22.635	27.267	24.5505	23.3105	22.4316	24.4275	18.7677	14.2033	12.2884	27.9915
825.5	22.6796	27.2656	24.4775	23.3199	22.4254	24.4338	18.7038	14.2217	12.3019	27.9712
825.95	22.7372	27.2712	24.422	23.3151	22.4188	24.4533	18.6645	14.2839	12.2766	27.974
826.4	22.7494	27.2825	24.3493	23.2675	22.385	24.4683	18.7032	14.3419	12.2522	27.9331
826.85	22.7364	27.3468	24.3286	23.2902	22.374	24.4558	18.7432	14.3941	12.2439	27.9644
827.3	22.7017	27.4379	24.3488	23.3016	22.3701	24.4602	18.8228	14.4648	12.2652	27.9276
827.75	22.6756	27.5113	24.3374	23.3091	22.3866	24.4809	18.8864	14.4723	12.2889	27.884
828.2	22.6177	27.5444	24.3409	23.3369	22.4958	24.4707	18.8975	14.4557	12.2509	27.8691
828.65	22.5589	27.5222	24.3472	23.3312	22.5651	24.4547	18.901	14.4051	12.2181	27.8189
829.1	22.4952	27.4586	24.3113	23.3996	22.6249	24.4282	18.8831	14.3469	12.1813	27.7927
829.55	22.4303	27.4001	24.325	23.4737	22.6738	24.371	18.8569	14.2928	12.1812	27.8213
830	22.4098	27.3792	24.3526	23.5498	22.6006	24.3904	18.8202	14.2998	12.2336	27.8586
830.45	22.4525	27.3662	24.3715	23.611	22.5504	24.4004	18.8281	14.3258	12.269	27.9235
830.9	22.5499	27.4006	24.422	23.5335	22.532	24.4096	18.8197	14.3683	12.3031	28.0099
831.35	22.6432	27.4486	24.4584	23.4463	22.4643	24.45	18.8072	14.4267	12.2883	28.0172
831.8	22.7339	27.4566	24.4468	23.3454	22.444	24.4429	18.8056	14.5024	12.2845	28.0606
832.25	22.7519	27.4868	24.4376	23.2888	22.4166	24.4667	18.73	14.5921	12.2937	28.0985
832.7	22.7273	27.4757	24.4563	23.2966	22.367	24.5035	18.6641	14.6464	12.2705	28.1262
833.15	22.6271	27.4232	24.4791	23.3281	22.3694	24.5225	18.6142	14.6956	12.2725	28.1988
833.6	22.4963	27.4313	24.5611	23.4108	22.3671	24.551	18.5983	14.6103	12.2203	28.1604
834.05	22.3906	27.414	24.6263	23.4516	22.3472	24.5668	18.614	14.5172	12.1533	28.1182
834.5	22.3067	27.4319	24.6337	23.5104	22.3243	24.5743	18.6832	14.4459	12.1608	28.0633
834.95	22.3805	27.514	24.626	23.5559	22.3062	24.5666	18.7501	14.393	12.1677	27.9612
835.4	22.49	27.6191	24.5964	23.5451	22.3122	24.5367	18.7992	14.4318	12.2049	27.8978
835.85	22.6122	27.681	24.5766	23.5463	22.3468	24.5084	18.859	14.4528	12.2693	27.8423
836.3	22.7776	27.7359	24.5602	23.5479	22.4146	24.4599	18.8418	14.4545	12.251	27.8002
836.75	22.8372	27.7112	24.5832	23.5331	22.4877	24.4719	18.8182	14.4446	12.2295	27.7839
837.2	22.8937	27.5753	24.5991	23.5114	22.5029	24.5013	18.7701	14.4223	12.2446	27.802
837.65	22.9265	27.5445	24.6011	23.5086	22.5273	24.5484	18.7193	14.3978	12.2526	27.8267
838.1	22.8607	27.4812	24.6137	23.4884	22.4978	24.6425	18.6158	14.4028	12.3275	27.8708
838.55	22.8213	27.4586	24.5659	23.5106	22.4392	24.6657	18.5379	14.386	12.3942	27.9467
839	22.7573	27.4978	24.5423	23.5388	22.4449	24.767	18.5123	14.372	12.4146	28.0029
839.45	22.7344	27.4789	24.5707	23.5451	22.4226	24.8331	18.4797	14.374	12.4369	28.0378
839.9	22.7832	27.4859	24.6185	23.5395	22.4439	24.8396	18.6205	14.3563	12.4171	28.043
840.35	22.8281	27.4933	24.6864	23.5044	22.4802	24.8676	18.7072	14.4239	12.4244	28.1063
840.8	22.8345	27.5065	24.7017	23.5363	22.4886	24.7434	18.7475	14.474	12.4652	28.1647
841.25	22.7789	27.5289	24.722	23.5691	22.4966	24.6363	18.7694	14.5358	12.4722	28.2297
841.7	22.6886	27.5402	24.716	23.6154	22.4791	24.5632	18.7207	14.6073	12.4856	28.3032
842.15	22.5925	27.5587	24.7176	23.6661	22.4656	24.4952	18.706	14.5776	12.4843	28.2276
842.6	22.5934	27.5674	24.7848	23.6284	22.444	24.5044	18.7031	14.5619	12.4498	28.1721
843.05	22.6324	27.585	24.7475	23.612	22.4469	24.5193	18.7045	14.5177	12.4368	28.1014
843.5	22.6735	27.6083	24.7235	23.5882	22.4727	24.5182	18.6797	14.4618	12.4378	28.0212
843.95	22.7186	27.6049	24.6734	23.5632	22.3914	24.5159	18.6603	14.4199	12.4419	28.0026
844.4	22.7201	27.5948	24.5826	23.5692	22.3338	24.5194	18.6263	14.3927	12.4707	27.9903
844.85	22.6931	27.5773	24.555	23.5338	22.2547	24.5184	18.6536	14.3973	12.5215	28.0387
845.3	22.6689	27.5596	24.5395	23.61	22.1572	24.5947	18.6841	14.4256	12.5757	28.0873
845.75	22.6652	27.5874	24.5862	23.6765	22.2504	24.6996	18.7167	14.4856	12.6153	28.1368
846.2	22.6717	27.6305	24.6353	23.7587	22.3394	24.761	18.7908	14.553	12.6246	28.1428
846.65	22.7525	27.6757	24.6809	23.8804	22.4305	24.8177	18.7944	14.592	12.5922	28.1399
847.1	22.842	27.7378	24.6981	23.8057	22.542	24.7752	18.8117	14.607	12.5271	28.1489
847.55	22.8841	27.7691	24.6572	23.7332	22.5695	24.7405	18.8527	14.6186	12.4734	28.1702
848	22.9133	27.7938	24.6441	23.6407	22.5745	24.7596	18.8705	14.5795	12.4526	28.2128
848.45	22.879	27.7921	24.6163	23.5434	22.5974	24.7815	18.9186	14.5563	12.5286	28.1862
848.9	22.831	27.7802	24.62	23.5602	22.6236	24.8501	18.9454	14.5337	12.6194	28.1632
849.35	22.8436	27.7528	24.6535	23.6222	22.6368	24.8473	18.8939	14.507	12.6978	28.1236
849.8	22.8495	27.699	24.614	23.6784	22.6678	24.819	18.8382	14.4947	12.7448	28.1242
850.25	22.8751	27.6495	24.6058	23.6979	22.6776	24.7829	18.7902	14.48	12.6434	28.1766
850.7	22.9085	27.5686	24.563	23.6887	22.6445	24.7156	18.7779	14.4824	12.5822	28.2544
851.15	22.9035	27.4826	24.5068	23.6108	22.6304	24.682	18.8324	14.4659	12.5299	28.3259
851.6	22.9101	27.5163	24.541	23.5589	22.6087	24.6579	18.8683	14.4752	12.4979	28.3325
852.05	22.905	27.6021	24.5769	23.5595	22.5943	24.6491	18.9018	14.4589	12.5314	28.3191
852.5	22.8675	27.7251	24.6443	23.5959	22.602	24.6719	18.8952	14.4266	12.5031	28.246
852.95	22.8384	27.9074	24.7189	23.6638	22.5702	24.7068	18.8445	14.433	12.455	28.1996
853.4	22.7957	27.9167	24.7447	23.703	22.5617	24.736	18.8301	14.4484	12.4249	28.1534
853.85	22.7549	27.9034	24.7874	23.6714	22.5452	24.7754	18.8092	14.495	12.4113	28.1056
854.3	22.7793	27.883	24.8037	23.5839	22.5385	24.8091	18.8013	14.5772	12.4317	28.1103
854.75	22.795	27.8125	24.8354	23.5221	22.5841	24.8243	18.796	14.641	12.4829	28.1065
855.2	22.8382	27.8132	24.8801	23.4885	22.5898	24.8364	18.7545	14.693	12.4849	28.2054
855.65	22.8967	27.7933	24.8457	23.5307	22.6298	24.8102	18.6728	14.7518	12.4736	28.3129
856.1	22.9247	27.7341	24.8378	23.5905	22.6635	24.8222	18.5972	14.7598	12.4834	28.3676
856.55	22.9258	27.686	24.8147	23.6062	22.652	24.8376	18.5651	14.7724	12.5071	28.4368
857	22.8996	27.6495	24.8005	23.6237	22.6638	24.8608	18.5813	14.7596	12.5926	28.3782
857.45	22.8596	27.5932	24.8337	23.6026	22.6381	24.8793	18.6673	14.7235	12.6725	28.4193
857.9	22.7992	27.6067	24.8422	23.5955	22.6022	24.798	18.7516	14.6825	12.6873	28.4788
858.35	22.8291	27.6468	24.8518	23.6054	22.5907	24.732	18.8114	14.6376	12.6459	28.4993
858.8	22.876	27.6875	24.8627	23.5934	22.5972	24.6693	18.8321	14.6382	12.5768	28.5812
859.25	22.915	27.7924	24.8842	23.5846	22.6273	24.6434	18.8224	14.6201	12.5296	28.4534
859.7	23.0054	27.8423	24.9305	23.5661	22.6909	24.6731	18.8093	14.6532	12.5519	28.3699
860.15	23.0079	27.8658	24.9389	23.55	22.749	24.6907	18.7748	14.6736	12.6165	28.3248
860.6	22.988	27.8798	24.9351	23.5306	22.7722	24.7047	18.754	14.6534	12.6532	28.278
861.05	23.061	27.8319	24.9184	23.5365	22.7519	24.7172	18.7222	14.681	12.6785	28.3359
861.5	23.0907	27.8244	24.8677	23.5602	22.6856	24.7368	18.7087	14.6837	12.6734	28.3491
861.95	23.1749	27.8117	24.8772	23.5861	22.607	24.7765	18.7264	14.6913	12.6622	28.337
862.4	23.2934	27.8123	24.8222	23.6346	22.5094	24.8439	18.7524	14.7001	12.688	28.3257
862.85	23.2712	27.8572	24.7574	23.6504	22.4437	24.8981	18.7782	14.7042	12.7064	28.3072
863.3	23.249	27.8578	24.7152	23.6488	22.373	24.9352	18.7963	14.7	12.711	28.2933
863.75	23.1881	27.8566	24.6382	23.6309	22.328	24.9405	18.811	14.7128	12.6969	28.3119
864.2	23.075	27.8344	24.6915	23.6386	22.3479	24.8821	18.8062	14.7397	12.6723	28.3274
864.65	22.9969	27.7814	24.7718	23.6795	22.4006	24.8957	18.8448	14.7336	12.6682	28.3839
865.1	22.9388	27.7912	24.8701	23.7219	22.5108	24.936	18.8734	14.7279	12.691	28.4728
865.55	22.9024	27.8485	24.9832	23.7981	22.6071	24.9994	18.9183	14.6998	12.7282	28.511
866	22.9117	27.9586	24.9987	23.8322	22.679	25.078	18.9787	14.6869	12.7598	28.6195
866.45	22.9306	28.1248	24.9984	23.8355	22.6923	25.0291	18.98	14.6969	12.7321	28.702
866.9	22.9494	28.1636	24.9286	23.8126	22.6688	24.954	18.9675	14.7304	12.6863	28.7252
867.35	22.9725	28.1518	24.8604	23.7519	22.6252	24.8744	18.9104	14.7729	12.6728	28.776
867.8	22.9888	28.0805	24.8493	23.6704	22.5565	24.8224	18.8929	14.7822	12.6558	28.6777
868.25	23.0895	27.8993	24.8408	23.5834	22.5261	24.8299	18.8879	14.7875	12.7134	28.5897
868.7	23.1875	27.8764	24.9183	23.5494	22.5242	24.8418	18.9249	14.7593	12.7637	28.5419
869.15	23.2451	27.8574	24.9795	23.5253	22.575	24.8535	18.9987	14.7501	12.7752	28.4828
869.6	23.3095	27.8384	25.0243	23.5269	22.6486	24.8549	19.0079	14.7667	12.7867	28.4965
870.05	23.2656	27.9109	25.0567	23.5549	22.714	24.8294	19.0221	14.773	12.7931	28.4704
870.5	23.1975	27.9095	25.0662	23.5823	22.7623	24.8112	19.001	14.8084	12.8186	28.4322
870.95	23.1734	27.9235	24.9761	23.6317	22.7617	24.8066	18.9539	14.8217	12.887	28.4205
871.4	23.1324	27.937	24.8568	23.6773	22.7543	24.8071	18.9119	14.83	12.9637	28.4262
871.85	23.1153	27.9195	24.7627	23.7137	22.727	24.8555	18.8963	14.8515	12.9882	28.4789
872.3	23.1253	27.9171	24.6212	23.7431	22.6717	24.8905	18.94	14.8535	13.0376	28.581
872.75	23.1613	27.9085	24.69	23.7047	22.646	24.8866	19.0177	14.8568	13.0143	28.6673
873.2	23.1869	27.9252	24.8011	23.6873	22.6332	24.8458	19.0974	14.8656	13.0036	28.7247
873.65	23.2455	27.9591	24.8812	23.6668	22.632	24.7828	19.1708	14.8611	13.0351	28.7559
874.1	23.2946	27.983	25.0295	23.6383	22.6649	24.7173	19.1652	14.8782	12.993	28.6932
874.55	23.2681	28.0039	25.0863	23.7251	22.6973	24.6642	19.123	14.8877	12.9692	28.6042
875	23.2627	28.0297	25.1045	23.786	22.721	24.6814	19.088	14.876	12.933	28.5373
875.45	23.2416	28.0285	25.1257	23.8425	22.7568	24.6929	19.0487	14.8711	12.8741	28.4738
875.9	23.2153	28.0234	25.0823	23.8949	22.7802	24.7417	19.0282	14.8606	12.8849	28.4783
876.35	23.2348	28.0242	25.0304	23.8682	22.7748	24.8015	19.0363	14.9516	12.9266	28.52
876.8	23.2201	28.0063	24.9922	23.8512	22.758	24.8169	19.0707	15.052	12.9403	28.5557
877.25	23.1722	28	24.9878	23.8474	22.7339	24.8297	19.0269	15.1759	12.9678	28.5931
877.7	23.1203	27.9602	25.0252	23.8138	22.7182	24.8212	18.9923	15.2828	12.9567	28.6167
878.15	23.0346	27.9275	25.0431	23.7872	22.7198	24.8326	18.9428	15.2187	12.9478	28.6248
878.6	23.0047	27.9316	25.0328	23.7599	22.7408	24.8574	18.8583	15.1517	12.9756	28.6223
879.05	23.0353	27.9487	25.0188	23.7051	22.7698	24.9119	18.8985	15.0575	12.9972	28.6135
879.5	23.0878	28.0471	24.9963	23.668	22.7884	24.9864	18.9211	14.9775	13.0123	28.6013
879.95	23.1933	28.1139	25.0041	23.6423	22.804	25.0364	18.8997	14.9828	12.9767	28.5972
880.4	23.2706	28.1325	25.078	23.619	22.7982	25.0697	18.8999	15.014	12.9558	28.5922
880.85	23.2957	28.1574	25.1175	23.6116	22.7665	25.0972	18.8654	15.0005	12.9472	28.6197
881.3	23.3181	28.1284	25.1449	23.6699	22.7536	25.1001	18.8717	14.9883	12.9738	28.6317
881.75	23.2841	28.1074	25.1527	23.7553	22.7546	25.0715	18.9806	14.9625	13.0708	28.6475
882.2	23.2608	28.0793	25.1278	23.8343	22.7906	25.0435	19.0927	14.9145	13.0972	28.6882
882.65	23.2581	28.124	25.163	23.9245	22.8803	24.9708	19.1711	14.9791	13.1018	28.6877
883.1	23.2552	28.1853	25.2285	23.9402	22.9565	24.8943	19.2278	15.0143	13.0972	28.6828
883.55	23.2868	28.2968	25.3028	23.9324	23.0244	24.8306	19.199	15.0747	13.0443	28.6899
884	23.3092	28.459	25.3688	23.9465	23.0435	24.774	19.1739	15.1081	13.0581	28.6806
884.45	23.4284	28.4524	25.3421	23.9959	23.0087	24.738	19.1413	15.0748	13.1023	28.6918
884.9	23.5241	28.4354	25.2883	24.0291	22.966	24.7106	19.1717	15.0731	13.1323	28.7498
885.35	23.6222	28.3805	25.2087	24.0179	22.9282	24.7691	19.247	15.0459	13.1573	28.7722
885.8	23.714	28.302	25.1368	23.9861	22.9193	24.8492	19.286	15.018	13.1803	28.79
886.25	23.6311	28.29	25.1307	23.8655	22.9077	24.9449	19.3491	14.9839	13.1853	28.7864
886.7	23.5558	28.2635	25.1042	23.8004	22.966	25.0206	19.2924	14.9618	13.1973	28.7429
887.15	23.4735	28.2417	25.0811	23.7805	23.0094	25.0464	19.2084	14.9524	13.2503	28.7274
887.6	23.3707	28.2148	25.0482	23.7717	23.0595	25.0629	19.1614	15.0176	13.2542	28.7407
888.05	23.3434	28.202	24.9851	23.8289	23.1463	25.0901	19.1322	15.0895	13.2582	28.7779
888.5	23.3265	28.2018	24.9432	23.871	23.1075	25.1244	19.1518	15.127	13.2695	28.8322
888.95	23.3066	28.1799	24.9664	23.9014	23.0738	25.1467	19.1965	15.1524	13.2389	28.8602
889.4	23.3411	28.1511	25.0043	23.9194	23.0186	25.1646	19.2395	15.1395	13.2437	28.8352
889.85	23.3841	28.1268	25.0614	23.9121	22.9296	25.1465	19.2568	15.1074	13.236	28.806
890.3	23.4421	28.1264	25.1452	23.8777	22.8893	25.124	19.272	15.0944	13.2078	28.7743
890.75	23.4817	28.1438	25.1764	23.881	22.8605	25.0809	19.2382	15.1034	13.2259	28.768
891.2	23.5012	28.1979	25.1602	23.9111	22.8518	25.0172	19.1778	15.0927	13.2429	28.806
891.65	23.5292	28.2498	25.1377	23.9424	22.8474	24.9853	19.1077	15.1277	13.2857	28.8267
892.1	23.5177	28.2699	25.1082	24.0229	22.8696	24.9004	19.0758	15.1526	13.3281	28.8379
892.55	23.5348	28.3185	25.0824	24.0809	22.8882	24.8225	19.0872	15.1698	13.3352	28.8172
893	23.5409	28.3277	25.1334	24.0415	22.8944	24.7583	19.0986	15.1994	13.333	28.7728
893.45	23.5098	28.3286	25.1796	24.0173	22.9207	24.6776	19.1326	15.2469	13.2995	28.7814
893.9	23.5195	28.3552	25.203	23.9422	22.9591	24.7512	19.135	15.285	13.311	28.7992
894.35	23.5232	28.3366	25.2628	23.8321	22.9819	24.8411	19.0821	15.2795	13.3419	28.8439
894.8	23.525	28.328	25.2853	23.8493	23.0162	24.9232	19.0436	15.2857	13.3906	28.9209
895.25	23.5473	28.3027	25.3306	23.8611	23.0726	25.0207	19.0039	15.2104	13.4476	28.9571
895.7	23.5331	28.2397	25.471	23.9138	23.0609	25.0243	18.9757	15.1616	13.4594	28.9787
896.15	23.5022	28.197	25.5667	23.9896	23.0508	25.0371	19.023	15.1749	13.4724	28.9914
896.6	23.4721	28.1766	25.6543	24.0308	23.0346	25.0658	19.0759	15.1766	13.4734	28.9849
897.05	23.4514	28.2218	25.73	24.0845	22.9787	25.0761	19.0475	15.2296	13.497	28.99
897.5	23.4372	28.3565	25.6246	24.1911	22.9778	25.1043	19.0191	15.2877	13.5355	29.0232
897.95	23.4563	28.5014	25.5063	24.3139	22.9935	25.1142	18.9725	15.3582	13.5417	29.0927
898.4	23.4684	28.6197	25.4208	24.4223	23.0242	25.0898	18.9204	15.4095	13.5332	29.1358
898.85	23.486	28.6969	25.3115	24.4921	23.061	25.0399	19.0278	15.4687	13.521	29.1324
899.3	23.5363	28.673	25.2962	24.4139	23.1019	24.9653	19.1239	15.4808	13.5075	29.0901
899.75	23.553	28.6313	25.285	24.3201	23.1261	24.9037	19.2136	15.425	13.5243	28.9857
900.2	23.5855	28.5759	25.2483	24.2127	23.1116	24.8594	19.2921	15.3946	13.5556	28.9215
900.65	23.5885	28.5154	25.2458	24.1143	23.1042	24.9067	19.2708	15.3186	13.5515	28.9151
901.1	23.5507	28.4656	25.2492	24.1042	23.088	24.9807	19.2422	15.2814	13.5555	28.9449
901.55	23.5269	28.4209	25.3105	24.0903	23.0752	25.0622	19.2199	15.2679	13.5461	29.0001
902	23.5064	28.4246	25.392	24.0768	23.0842	25.177	19.2789	15.2587	13.4794	29.0278
902.45	23.5239	28.4166	25.4657	24.084	23.1131	25.1892	19.3471	15.2755	13.4507	29.048
902.9	23.5773	28.4637	25.5595	24.0726	23.0991	25.2412	19.4375	15.2719	13.4036	29.0438
903.35	23.6516	28.5176	25.5978	24.0502	23.0957	25.2716	19.5063	15.2826	13.3705	29.0514
903.8	23.7107	28.5454	25.6062	24.0514	23.0951	25.2749	19.4525	15.2679	13.4395	29.0929
904.25	23.7371	28.5903	25.5973	24.0432	23.0417	25.3249	19.4032	15.251	13.5179	29.1299
904.7	23.7372	28.5899	25.5364	24.079	23.049	25.264	19.3576	15.274	13.6266	29.1741
905.15	23.7071	28.5801	25.5355	24.1628	23.0554	25.2049	19.3248	15.2917	13.7255	29.1998
905.6	23.7026	28.5701	25.5515	24.2451	22.9978	25.1485	19.3263	15.3318	13.7812	29.1984
906.05	23.7113	28.5638	25.5907	24.342	22.9783	25.0955	19.3226	15.4092	13.7876	29.173
906.5	23.7154	28.5802	25.6589	24.3719	22.9489	25.0911	19.2172	15.4572	13.7054	29.2092
906.95	23.716	28.6201	25.6761	24.348	22.9172	25.078	19.0799	15.5135	13.6112	29.2725
907.4	23.6925	28.6598	25.6718	24.2863	22.9961	25.0935	18.9714	15.5793	13.5391	29.3378
907.85	23.678	28.6997	25.6626	24.1974	23.0849	25.1019	18.8832	15.5901	13.5172	29.4122
908.3	23.697	28.7398	25.6679	24.1155	23.1391	25.1436	18.9617	15.622	13.6126	29.396
908.75	23.7507	28.7518	25.6684	24.0593	23.189	25.2106	19.1072	15.6232	13.7233	29.3673
909.2	23.7966	28.7682	25.6855	24.0275	23.2137	25.2491	19.2239	15.6161	13.788	29.3337
909.65	23.8431	28.7657	25.67	23.9992	23.2001	25.2927	19.332	15.6425	13.8144	29.3163
910.1	23.8563	28.7574	25.6096	24.0299	23.1867	25.2965	19.3492	15.636	13.7845	29.3211
910.55	23.8356	28.7599	25.556	24.0712	23.1953	25.2825	19.3139	15.7095	13.7825	29.3198
911	23.8465	28.745	25.5213	24.1196	23.1686	25.273	19.3032	15.7614	13.8014	29.3179
911.45	23.8336	28.7514	25.5609	24.1731	23.1576	25.2259	19.2434	15.8013	13.8045	29.2966
911.9	23.861	28.7383	25.6374	24.1734	23.1758	25.2098	19.21	15.847	13.8206	29.2984
912.35	23.9007	28.6951	25.7422	24.164	23.1639	25.1988	19.2135	15.8125	13.7783	29.3143
912.8	23.9272	28.6359	25.833	24.1805	23.1416	25.1662	19.223	15.7822	13.7516	29.3512
913.25	23.9628	28.6148	25.8214	24.2516	23.1199	25.1295	19.3113	15.7508	13.7892	29.3787
913.7	23.9627	28.61	25.7862	24.3519	23.094	25.0809	19.3775	15.7246	13.8417	29.3879
914.15	23.955	28.6552	25.7181	24.422	23.0681	25.0365	19.4145	15.7081	13.917	29.3802
914.6	23.934	28.7632	25.6215	24.4317	23.0888	25.0152	19.4442	15.7256	13.968	29.3567
915.05	23.9577	28.7862	25.5904	24.3704	23.1206	25.1154	19.447	15.7676	13.99	29.4214
915.5	23.9924	28.8319	25.6042	24.2948	23.1409	25.2197	19.4429	15.8239	13.9905	29.4774
915.95	24.035	28.8416	25.633	24.2624	23.192	25.3355	19.464	15.8833	13.9842	29.5229
916.4	24.0874	28.8325	25.6937	24.286	23.2134	25.4373	19.4801	15.8893	13.9906	29.5801
916.85	24.0669	28.8641	25.7493	24.3027	23.2336	25.4487	19.5065	15.848	13.9735	29.5213
917.3	24.0514	28.8945	25.7715	24.3297	23.309	25.4428	19.5739	15.8056	13.9414	29.5202
917.75	24.0314	28.9563	25.789	24.3524	23.3652	25.4151	19.592	15.7818	13.9609	29.528
918.2	24.0082	29.0063	25.8048	24.3397	23.4238	25.3989	19.6046	15.7897	13.9778	29.5279
918.65	24.0312	29.0624	25.8036	24.3695	23.5004	25.3735	19.5835	15.8294	14.0304	29.5773
919.1	24.0477	29.1073	25.7896	24.3968	23.5051	25.3752	19.5159	15.8685	14.1042	29.5503
919.55	24.0639	29.1202	25.8235	24.3932	23.4955	25.4054	19.4783	15.9026	14.1204	29.5535
920	24.0807	29.1226	25.7749	24.4048	23.4883	25.4349	19.4643	15.926	14.1436	29.546
920.45	24.0828	29.1027	25.7515	24.4051	23.4542	25.4997	19.4839	15.9389	14.1824	29.5504
920.9	24.0819	29.0643	25.7373	24.4145	23.433	25.5324	19.5465	15.9144	14.2238	29.5876
921.35	24.0793	29.0593	25.6631	24.4616	23.4335	25.5416	19.6224	15.8702	14.2983	29.5772
921.8	24.0858	29.0636	25.7369	24.4139	23.4422	25.5658	19.681	15.8589	14.3677	29.5666
922.25	24.0888	29.0971	25.7929	24.3891	23.4347	25.5662	19.7185	15.8307	14.3692	29.5454
922.7	24.0998	29.1228	25.853	24.3186	23.4474	25.5765	19.7358	15.8334	14.3536	29.5223
923.15	24.1379	29.1269	25.9138	24.2032	23.4807	25.6024	19.7368	15.8498	14.322	29.5382
923.6	24.1888	29.1276	25.8958	24.2529	23.4972	25.6064	19.7457	15.8462	14.3044	29.585
924.05	24.2275	29.1062	25.8857	24.2604	23.5421	25.5827	19.7442	15.8748	14.3545	29.6397
924.5	24.2491	29.1188	25.8832	24.3309	23.5689	25.5737	19.73	15.9348	14.4158	29.6849
924.95	24.2224	29.1187	25.8737	24.4655	23.5243	25.5303	19.7166	16.003	14.4741	29.7005
925.4	24.1492	29.1279	25.8986	24.5586	23.4927	25.4803	19.6646	16.065	14.4847	29.6814
925.85	24.1223	29.1554	25.9113	24.6688	23.4555	25.395	19.6228	16.1157	14.4516	29.5976
926.3	24.1141	29.1614	25.9315	24.8012	23.4069	25.3066	19.589	16.1	14.4423	29.5272
926.75	24.1669	29.1989	25.9964	24.8749	23.4055	25.239	19.5111	16.0907	14.434	29.5003
927.2	24.2479	29.2152	26.0118	24.942	23.4037	25.2044	19.492	16.0739	14.4589	29.4901
927.65	24.3003	29.2293	26.0196	25.0121	23.3959	25.3234	19.4807	16.071	14.4738	29.5437
928.1	24.3349	29.2668	26.0005	24.9555	23.4287	25.4189	19.5052	16.0891	14.4269	29.609
928.55	24.3206	29.2345	25.9549	24.9057	23.4692	25.5089	19.6443	16.0925	14.3789	29.6234
929	24.3137	29.1833	25.9472	24.808	23.5374	25.5639	19.7342	16.1137	14.3452	29.6448
929.45	24.2888	29.1123	25.9743	24.6827	23.6075	25.5508	19.8266	16.1131	14.353	29.6824
929.9	24.2769	29.0267	26.0115	24.6746	23.6526	25.5692	19.8762	16.1422	14.3847	29.716
930.35	24.2943	29.05	26.0475	24.5988	23.6958	25.5986	19.8612	16.172	14.412	29.7724
930.8	24.2871	29.1497	26.0635	24.5219	23.6599	25.6315	19.8614	16.1916	14.3904	29.8273
931.25	24.3182	29.2679	26.0766	24.4788	23.6391	25.6469	19.8849	16.2198	14.3602	29.8458
931.7	24.3583	29.3652	26.1279	24.3526	23.626	25.6353	19.9034	16.2379	14.37	29.8543
932.15	24.3563	29.4146	26.1804	24.3985	23.5801	25.607	19.8918	16.2547	14.3968	29.8907
932.6	24.369	29.4263	26.2305	24.4899	23.5964	25.5804	19.8897	16.2647	14.4626	29.9141
933.05	24.3539	29.4367	26.2399	24.5748	23.5691	25.5634	19.8177	16.2671	14.4936	29.9427
933.5	24.3419	29.4747	26.2108	24.7214	23.5486	25.5719	19.7626	16.2485	14.4997	29.9698
933.95	24.3692	29.4814	26.2094	24.7813	23.57	25.6155	19.7369	16.2413	14.5121	29.9579
934.4	24.4294	29.4782	26.2251	24.7774	23.5737	25.6978	19.6878	16.2345	14.5402	29.9204
934.85	24.4929	29.4753	26.2685	24.8384	23.6258	25.7694	19.6715	16.2482	14.6124	29.9046
935.3	24.5438	29.4492	26.2955	24.8712	23.6319	25.8374	19.6619	16.2871	14.6706	29.8963
935.75	24.5967	29.4668	26.2918	24.9031	23.6191	25.8631	19.639	16.3013	14.697	29.894
936.2	24.6098	29.4722	26.2392	25.0007	23.6093	25.8437	19.67	16.3358	14.6995	29.8729
936.65	24.6719	29.4659	26.1718	24.9533	23.5437	25.7889	19.7337	16.3567	14.6943	29.8349
937.1	24.7408	29.4985	26.1541	24.9144	23.5314	25.7031	19.7835	16.3511	14.7239	29.7796
937.55	24.8047	29.4919	26.1434	24.8745	23.5092	25.6623	19.8887	16.3578	14.7896	29.7338
938	24.8517	29.5253	26.2147	24.7855	23.4905	25.652	19.9352	16.3647	14.8613	29.8214
938.45	24.8228	29.5581	26.2912	24.7765	23.542	25.6416	19.9569	16.3508	14.9078	29.8807
938.9	24.7839	29.5454	26.3435	24.7792	23.5672	25.6717	19.9986	16.3663	14.916	29.9724
939.35	24.7336	29.5909	26.3809	24.7657	23.6003	25.668	19.9941	16.3953	14.9136	30.0489
939.8	24.7233	29.596	26.3667	24.7861	23.6122	25.6447	20.044	16.374	14.902	30.0233
940.25	24.7609	29.6134	26.3226	24.816	23.5839	25.7132	20.0765	16.3905	14.919	30.0672
940.7	24.7546	29.6647	26.2545	24.8099	23.539	25.7517	20.0738	16.3936	14.9502	30.0773
941.15	24.7505	29.6589	26.1972	24.8375	23.5019	25.786	20.0672	16.4003	14.9518	30.0964
941.6	24.729	29.6984	26.1654	24.8529	23.5047	25.823	20.025	16.4714	14.9544	30.1401
942.05	24.663	29.7245	26.2056	24.8652	23.5228	25.8049	19.9669	16.5146	14.9413	30.1393
942.5	24.6734	29.7467	26.2751	24.9001	23.5888	25.8078	19.9502	16.5437	14.9449	30.1475
942.95	24.7106	29.7615	26.3793	24.9165	23.6625	25.8456	19.9393	16.5573	14.9974	30.1435
943.4	24.7589	29.7139	26.4728	25.0283	23.7077	25.8916	19.93	16.5461	15.0893	30.1424
943.85	24.8619	29.6536	26.5422	25.1277	23.7587	25.9517	19.9996	16.5478	15.1567	30.1467
944.3	24.9448	29.6474	26.5903	25.2459	23.7946	25.9854	20.0226	16.5894	15.1964	30.1738
944.75	24.9854	29.6941	26.5782	25.3556	23.8068	25.9901	20.0059	16.617	15.2048	30.2303
945.2	25.025	29.8011	26.5646	25.2975	23.8259	25.9801	19.9893	16.6523	15.1598	30.2685
945.65	25.019	29.96	26.5585	25.2297	23.8161	25.9461	19.9209	16.6856	15.1462	30.3184
946.1	25.0014	29.9963	26.5841	25.1402	23.8075	25.9517	19.8971	16.6854	15.1526	30.3442
946.55	25.0005	30.0088	26.6506	25.0545	23.799	25.9578	19.9545	16.7188	15.1418	30.364
947	24.9893	29.9771	26.6905	25.0196	23.7945	26.0057	20.0354	16.7429	15.1431	30.4018
947.45	25.0102	29.9061	26.712	24.9577	23.8148	26.0671	20.1314	16.7719	15.1426	30.4257
947.9	25.0466	29.899	26.6874	24.8841	23.8148	26.0927	20.1995	16.7717	15.151	30.4538
948.35	25.0512	29.8953	26.6699	24.8134	23.8218	26.1231	20.2009	16.7634	15.1824	30.4719
948.8	25.0495	29.9436	26.6675	24.7664	23.8122	26.0892	20.1733	16.7342	15.2159	30.4778
949.25	25.0414	30.0063	26.6319	24.7978	23.8031	26.1604	20.1284	16.7121	15.2368	30.4708
949.7	25.0288	30.0739	26.6321	24.8597	23.8171	26.2526	20.1103	16.7487	15.215	30.4644
950.15	25.0767	30.1405	26.5905	24.9148	23.855	26.355	20.1437	16.7869	15.2062	30.4655
950.6	25.1493	30.1563	26.5499	25.0102	23.9186	26.496	20.1847	16.859	15.2311	30.471
951.05	25.2126	30.1979	26.5419	25.0511	23.9525	26.4289	20.2239	16.9193	15.2845	30.498
951.5	25.2609	30.2077	26.5139	25.0699	23.9491	26.3451	20.238	16.9846	15.385	30.5141
951.95	25.2826	30.2045	26.561	25.1126	23.928	26.2449	20.2271	17.0115	15.4519	30.5187
952.4	25.3141	30.217	26.6186	25.0847	23.8977	26.1419	20.2444	17.0099	15.4741	30.5276
952.85	25.3596	30.1882	26.7049	25.1042	23.9153	26.1524	20.3034	17.0067	15.5113	30.5318
953.3	25.419	30.1856	26.8014	25.1608	23.968	26.1697	20.3527	16.9668	15.5414	30.5879
953.75	25.4598	30.1991	26.809	25.2227	24.0453	26.2191	20.4095	16.9565	15.6167	30.6409
954.2	25.4461	30.2034	26.82	25.3155	24.1158	26.2642	20.4019	16.998	15.7064	30.6908
954.65	25.4236	30.1995	26.7979	25.3651	24.1456	26.2839	20.3501	17.0398	15.7212	30.7288
955.1	25.3798	30.2053	26.7814	25.3274	24.1648	26.3106	20.3414	17.0986	15.6925	30.7142
955.55	25.3663	30.1676	26.7906	25.2402	24.1456	26.3006	20.3189	17.1859	15.6323	30.7692
956	25.3689	30.1518	26.8224	25.1775	24.1292	26.2864	20.3722	17.2239	15.5921	30.8315
956.45	25.3427	30.1663	26.8905	25.1462	24.1207	26.2703	20.4288	17.2662	15.582	30.9019
956.9	25.2983	30.1501	26.9585	25.2017	24.1189	26.2637	20.4681	17.2604	15.6107	31.0013
957.35	25.2329	30.2454	27.0486	25.2886	24.1098	26.2401	20.5098	17.2188	15.5625	30.9984
957.8	25.1904	30.3562	27.111	25.3153	24.1074	26.1999	20.4902	17.1941	15.4493	30.9808
958.25	25.1837	30.479	27.101	25.3067	24.128	26.1689	20.4799	17.1601	15.3644	30.9747
958.7	25.2579	30.6578	27.1158	25.2831	24.1596	26.1194	20.4445	17.1829	15.2768	30.9504
959.15	25.3543	30.716	27.1218	25.269	24.2086	26.1287	20.4086	17.195	15.3405	30.9585
959.6	25.4393	30.7359	27.078	25.3016	24.2525	26.1804	20.3945	17.2015	15.4637	30.9632
960.05	25.5085	30.7054	27.0664	25.3404	24.2645	26.2479	20.4169	17.2502	15.5426	30.9493
960.5	25.5235	30.6061	27.0192	25.3404	24.2471	26.3206	20.4423	17.2789	15.6068	30.925
960.95	25.4213	30.5705	26.9741	25.3147	24.2477	26.3635	20.4756	17.3355	15.6148	30.9206
961.4	25.3173	30.5522	26.9857	25.2915	24.2304	26.3662	20.5	17.3846	15.624	30.9256
961.85	25.2283	30.5733	27.0291	25.2947	24.2214	26.4341	20.4654	17.3574	15.675	30.9724
962.3	25.1408	30.6324	27.0711	25.3393	24.2043	26.5134	20.4549	17.314	15.7709	31.0418
962.75	25.2734	30.6586	27.1098	25.4082	24.167	26.6064	20.4383	17.254	15.8526	31.0869
963.2	25.4172	30.6564	27.1612	25.4571	24.1284	26.7214	20.5062	17.2013	15.9107	31.1308
963.65	25.5381	30.6357	27.2096	25.5169	24.0989	26.6912	20.5829	17.1958	15.9508	31.1092
964.1	25.6682	30.6194	27.2642	25.5634	24.1189	26.6351	20.6693	17.2336	15.9335	31.0746
964.55	25.6698	30.6081	27.3061	25.5871	24.135	26.5518	20.7723	17.2872	15.9158	31.0581
965	25.6618	30.6295	27.3309	25.6278	24.195	26.4753	20.7612	17.3483	15.8977	31.0488
965.45	25.6958	30.6461	27.3146	25.6282	24.2739	26.4666	20.7719	17.3826	15.878	31.0843
965.9	25.729	30.6562	27.3069	25.6233	24.3099	26.4768	20.748	17.4073	15.8724	31.1346
966.35	25.7596	30.7076	27.3147	25.6195	24.3573	26.5061	20.7115	17.3928	15.8806	31.1702
966.8	25.8094	30.7369	27.3097	25.5775	24.3839	26.543	20.6931	17.3809	15.9471	31.1788
967.25	25.8183	30.7882	27.3168	25.5242	24.3235	26.5775	20.6592	17.4062	16.0104	31.1687
967.7	25.8344	30.814	27.2931	25.4784	24.2809	26.6061	20.6396	17.3931	16.0687	31.1405
968.15	25.8925	30.7903	27.3638	25.4484	24.223	26.6251	20.6177	17.4327	16.0907	31.1328
968.6	25.906	30.7955	27.4475	25.4721	24.1509	26.6218	20.6229	17.4708	16.0301	31.1598
969.05	25.9399	30.7818	27.5384	25.5323	24.1883	26.6148	20.6405	17.5088	16.0035	31.1931
969.5	25.9589	30.7857	27.6276	25.5747	24.2326	26.595	20.6576	17.5733	16.0111	31.2253
969.95	25.9479	30.8053	27.5389	25.598	24.2971	26.5645	20.654	17.6317	16.0515	31.2374
970.4	25.9702	30.806	27.458	25.5679	24.371	26.5053	20.6649	17.6047	16.1283	31.2604
970.85	25.9888	30.8282	27.3972	25.5646	24.4138	26.4696	20.647	17.5578	16.1625	31.278
971.3	26.0001	30.876	27.3889	25.5907	24.4347	26.4613	20.6262	17.5272	16.1871	31.3069
971.75	26.0057	30.9139	27.447	25.6752	24.4478	26.4998	20.6529	17.4755	16.2028	31.3552
972.2	26.0123	30.9459	27.479	25.7978	24.4598	26.6197	20.6462	17.5703	16.2394	31.358
972.65	26.0547	30.9635	27.483	25.8622	24.4399	26.7247	20.6849	17.6634	16.301	31.3768
973.1	26.1034	30.932	27.4727	25.9086	24.4353	26.8105	20.7331	17.7485	16.3301	31.3918
973.55	26.1617	30.8965	27.4626	25.9002	24.4368	26.8458	20.6536	17.8079	16.3679	31.4
974	26.2393	30.8562	27.4733	25.8925	24.4468	26.7909	20.5932	17.8193	16.3719	31.4429
974.45	26.258	30.9055	27.4963	25.8837	24.4891	26.7196	20.5156	17.8344	16.363	31.4882
974.9	26.2992	30.9906	27.5173	25.8573	24.5086	26.6687	20.4232	17.8262	16.3817	31.5252
975.35	26.3245	31.1017	27.6029	25.79	24.5279	26.6326	20.523	17.8492	16.4039	31.5592
975.8	26.2904	31.2632	27.6954	25.7219	24.5463	26.6281	20.6092	17.8559	16.4278	31.5656
976.25	26.2687	31.2443	27.7748	25.6759	24.5447	26.6656	20.6944	17.8851	16.4465	31.5417
976.7	26.2277	31.2238	27.8232	25.6529	24.5828	26.705	20.8121	17.9436	16.4625	31.534
977.15	26.2482	31.2124	27.7893	25.7258	24.6056	26.7743	20.8305	18.0245	16.473	31.5088
977.6	26.3248	31.1585	27.7399	25.758	24.6032	26.8767	20.8759	18.0736	16.5038	31.5084
978.05	26.4149	31.2167	27.7009	25.8174	24.6142	26.938	20.9159	18.0759	16.5698	31.5376
978.5	26.5071	31.2745	27.7092	25.8795	24.6083	26.9555	20.9125	18.0338	16.6327	31.5684
978.95	26.5058	31.3146	27.7481	25.9076	24.5552	26.9602	20.9328	17.9503	16.6766	31.6611
979.4	26.5016	31.3518	27.7704	25.9984	24.5197	26.942	20.9443	17.9111	16.7012	31.7364
979.85	26.484	31.3931	27.8761	26.0537	24.4635	26.9454	20.9678	17.8963	16.7045	31.7901
980.3	26.454	31.4265	27.925	26.0905	24.4045	26.9783	21.0168	17.9243	16.7004	31.8516
980.75	26.485	31.4574	27.9805	26.0989	24.4668	26.9816	21.0447	17.9742	16.6978	31.8358
981.2	26.4871	31.5081	28.065	26.0489	24.5426	26.9905	21.0787	18.022	16.6924	31.8067
981.65	26.5044	31.4956	27.9952	25.9972	24.6477	26.9933	21.1053	18.0797	16.6701	31.792
982.1	26.5496	31.4923	27.9797	25.9557	24.7701	26.9826	21.127	18.1146	16.6429	31.7562
982.55	26.5752	31.4983	27.9276	25.9247	24.8156	26.9592	21.1555	18.1704	16.634	31.7779
983	26.6019	31.4916	27.8331	25.9339	24.8554	26.9209	21.1391	18.2004	16.6549	31.8534
983.45	26.6479	31.5325	27.8091	25.9321	24.8628	26.8777	21.1232	18.2259	16.6952	31.8943
983.9	26.6823	31.5519	27.7748	26.0432	24.8341	26.8638	21.1355	18.2631	16.7619	31.9432
984.35	26.7283	31.5717	27.7841	26.1683	24.8227	26.9093	21.1451	18.2665	16.8255	31.9716
984.8	26.7836	31.5982	27.8392	26.279	24.7939	26.9865	21.2064	18.2917	16.8736	31.9642
985.25	26.7844	31.6053	27.8733	26.4164	24.7974	27.0817	21.2622	18.3408	16.9163	32.0082
985.7	26.7582	31.6102	27.8642	26.3435	24.8146	27.1524	21.2775	18.3386	17.0192	32.0345
986.15	26.7291	31.5927	27.8556	26.2672	24.822	27.1893	21.2944	18.3489	17.1301	32.0387
986.6	26.6877	31.5569	27.8689	26.1898	24.8356	27.1948	21.2596	18.3545	17.2218	32.0243
987.05	26.6889	31.5422	27.9	26.0921	24.8285	27.2188	21.2152	18.3028	17.286	31.981
987.5	26.7325	31.5503	27.9607	26.0984	24.8374	27.2595	21.1713	18.3712	17.2068	31.9873
987.95	26.7569	31.6005	27.9847	26.0911	24.8767	27.3195	21.1552	18.4072	17.1207	32.0067
988.4	26.7896	31.6925	27.9135	26.0748	24.9316	27.3843	21.1725	18.438	17.0763	32.0687
988.85	26.7768	31.6714	27.8063	26.0864	25.0012	27.3884	21.2334	18.5051	17.0787	32.1435
989.3	26.7165	31.6554	28.252	26.0873	25.0465	27.384	21.3121	18.4839	17.1451	32.1605
989.75	26.6709	31.6045		25.8437	25.0526	27.3605	21.3495	18.5048	17.1991	32.2141
990.2	26.6479	31.4936			25.0393	27.3512	21.389	18.5313	17.1981	32.2306
990.65	26.6879	31.5768			24.9569	27.3663	21.3606	18.5355	17.1775	32.2656
991.1	26.7967	31.6366			24.887	27.388	21.352	18.5453	17.1615	32.3224
991.55	26.9053	31.6655			24.8309	27.3974	21.3476	18.559	17.1447	32.3335
992	27.0138	31.9164			24.7832	27.3641	21.3262	18.5641	17.1574	32.3846
992.45	27.0845				24.8347	27.3205	21.3737	18.6189	17.1535	32.4173
992.9	27.1377				24.8907	27.2705	21.3845	18.6819	17.1468	32.4303
993.35	27.1903				24.9428	27.268	21.424	18.7288	17.1782	32.4327
993.8	27.1981				25.0089	27.3098	21.4997	18.7697	17.2305	32.3823
994.25	27.2155				25.0496	27.3773	21.5328	18.7717	17.3015	32.3069
994.7	27.1831				25.0923	27.4258	21.5696	18.803	17.36	32.2813
995.15	27.1719				25.1311	27.4188	21.592	18.8178	17.3733	32.3085
995.6	27.2151				25.1367	27.3884	21.8473	18.8575	17.3709	32.3858
996.05	27.2823				25.1299	27.3384		18.8877	17.3712	32.6126
996.5	27.2299				25.1002	27.3138		18.8857	17.4103
					25.0995	27.3174		18.8966	17.4507
					25.1147	27.3176		18.8858	17.4811
					25.1341	27.2773		18.8888	17.5005
					25.1841	27.1509		18.8724	17.4844
					25.2128	26.9326		18.8425	17.4821
					25.3143	27.3661		18.977	17.3597

## Sheet: 2np(60ppm)
	run1	run2	run3	run4	run5	run6	run7	run9	run10	run11
Potential [mV]	di [µA/]	di [µA/]	di [µA/]	di [µA/]	di [µA/]	di [µA/]	di [µA/]	di [µA/]	di [µA/]	di [µA/]
200	76.6105	147.892	91.3715	102.663	88.0274	104.838	61.7606	52.6182	47.2646	128.718
200.45	61.3714	124.046	77.0681	86.232	74.0118	87.97	52.8403	44.7973	40.5173	107.345
200.9	50.7587	104.935	65.651	73.0682	62.773	74.6741	45.5743	38.5229	35.0318	90.3008
201.35	43.9434	90.7719	57.2862	63.3423	54.4863	64.8905	39.958	33.8411	30.8667	77.7972
201.8	40.06	81.0055	51.4721	56.6283	48.7898	58.1794	35.938	30.6086	27.8981	69.2205
202.25	38.3359	74.785	47.7541	52.3433	45.1713	53.968	33.2774	28.4984	25.9353	63.8692
202.7	36.9569	70.3106	45.1407	49.2651	42.5874	50.8898	31.3136	26.9351	24.4715	59.7764
203.15	35.7853	66.8719	43.0627	46.9442	40.5831	48.5364	29.8465	25.7232	23.3412	56.2669
203.6	34.8145	64.0901	41.4026	45.1024	38.9297	46.6258	28.6643	24.6884	22.3985	53.1609
204.05	34.0009	61.8046	40.0438	43.5858	37.5623	45.0661	27.6874	23.849	21.5522	50.2213
204.5	33.2474	59.5679	38.7079	42.2948	36.4301	43.7111	26.7922	23.0911	20.8311	48.0028
204.95	32.5605	57.4029	37.5556	41.1454	35.4411	42.5109	25.9995	22.446	20.1973	46.3877
205.4	31.9551	55.2704	36.5524	40.1375	34.5866	41.438	25.2829	21.8721	19.6627	45.2306
205.85	31.4014	53.1293	35.6169	39.23	33.8216	40.4473	24.6487	21.309	19.3217	44.5229
206.3	30.8866	51.5305	34.8704	38.4152	33.1175	39.6029	24.141	20.8274	18.9817	43.8459
206.75	30.507	50.295	34.1977	37.6818	32.5374	38.8389	23.6785	20.3357	18.6491	43.21
207.2	30.0911	49.3559	33.5798	36.9512	32.0167	38.1724	23.2367	19.9234	18.2899	42.5913
207.65	29.7918	48.699	33.0409	36.2971	31.5745	37.6148	22.795	19.6238	17.781	42.0166
208.1	29.5265	48.0477	32.5481	35.7119	31.1579	37.0526	22.4035	19.3944	17.3624	41.4983
208.55	29.1887	47.3831	32.0989	35.1432	30.7313	36.5505	22.025	19.2287	17.0123	41.024
209	28.8392	46.8017	31.6657	34.6601	30.3499	36.0724	21.7256	19.058	16.7346	40.5516
209.45	28.367	46.2289	31.2925	34.1878	29.9553	35.5847	21.4796	18.8499	16.4972	40.0715
209.9	27.9519	45.6398	30.9727	33.8283	29.6054	35.1391	21.2388	18.623	16.214	39.6345
210.35	27.6257	45.1847	30.6878	33.5154	29.2821	34.7116	21.0222	18.418	15.9467	39.2166
210.8	27.4083	44.7438	30.4658	33.2285	28.9582	34.3234	20.787	18.2016	15.6692	38.858
211.25	27.2878	44.3594	30.21	32.9886	28.6693	34.0011	20.5305	17.9993	15.47	38.5032
211.7	27.1273	43.9759	29.8776	32.5793	28.3548	33.7171	20.2428	17.7738	15.3308	38.1207
212.15	26.9897	43.5447	29.5258	32.1985	28.0161	33.4417	19.9966	17.5143	15.1686	37.7669
212.6	26.7317	43.0895	29.1327	31.7798	27.6932	33.1625	19.7485	17.3045	15.0431	37.4054
213.05	26.4512	42.5989	28.7877	31.3537	27.3864	32.866	19.56	17.1074	14.9174	37.1319
213.5	26.1671	42.2671	28.5219	31.0126	27.1066	32.5571	19.4277	16.936	14.8042	36.9426
213.95	25.7285	42.0032	28.2691	30.6573	26.9192	32.2836	19.2543	16.8183	14.7108	36.671
214.4	25.3836	41.7803	28.0688	30.3779	26.753	32.0417	19.1183	16.6927	14.5972	36.4434
214.85	25.0745	41.6627	27.8257	30.1472	26.5687	31.7759	18.9914	16.5712	14.4787	36.1977
215.3	24.8371	41.4877	27.6009	29.9447	26.4112	31.5353	18.859	16.4776	14.2674	35.8706
215.75	24.7212	41.2477	27.4103	29.7807	26.2247	31.3115	18.7828	16.374	14.0493	35.7798
216.2	24.5176	41.0172	27.2032	29.6278	26.0726	31.0326	18.6831	16.275	13.8543	35.7081
216.65	24.3083	40.7294	27.064	29.4191	25.9475	30.8094	18.5247	16.1787	13.6575	35.5847
217.1	24.063	40.3651	26.9144	29.2767	25.8392	30.6086	18.3486	16.1028	13.5909	35.5178
217.55	23.8197	40.1155	26.7441	29.1092	25.7189	30.3592	18.175	16.0129	13.5242	35.2251
218	23.8245	39.8726	26.5973	28.9147	25.5584	30.2273	18.0412	15.921	13.4618	34.9268
218.45	23.8487	39.6699	26.4351	28.7821	25.3963	30.1033	18.0011	15.8312	13.4507	34.6944
218.9	23.9373	39.5666	26.2611	28.5429	25.2165	29.9379	17.9922	15.6799	13.4108	34.44
219.35	24.0764	39.3552	26.1188	28.3368	25.0616	29.8452	17.9547	15.556	13.4068	34.201
219.8	24.0525	39.2109	25.9726	28.1328	24.8919	29.6985	17.892	15.4414	13.3882	33.9982
220.25	24.0169	39.0626	25.7969	27.921	24.7306	29.5582	17.7311	15.4329	13.3252	33.8414
220.7	23.9961	38.9546	25.6434	27.7947	24.5509	29.476	17.5544	15.483	13.2552	33.7477
221.15	23.9853	38.8169	25.4963	27.6822	24.3744	29.352	17.3908	15.4951	13.1848	33.829
221.6	24.0404	38.5682	25.3926	27.5739	24.2455	29.2438	17.2232	15.5146	13.1512	33.8051
222.05	24.1367	38.3014	25.3441	27.4667	24.1427	29.1227	17.1141	15.3325	13.0947	33.7027
222.5	24.1055	37.9314	25.3065	27.3262	24.1155	28.9808	17.0095	15.1553	13.0054	33.5067
222.95	23.9763	37.7573	25.2609	27.1752	24.0962	28.8307	16.9175	15.0064	12.8713	33.1204
223.4	23.7444	37.6799	25.119	27.0797	24.0783	28.6752	16.8456	14.8501	12.7042	32.8038
223.85	23.4811	37.6378	24.9886	27.0024	24.0554	28.5376	16.7698	14.8246	12.595	32.4873
224.3	23.2721	37.5957	24.8546	26.935	24.0087	28.4274	16.7171	14.7802	12.5364	32.233
224.75	23.1095	37.4121	24.7118	26.8766	23.9611	28.3054	16.6719	14.8074	12.5111	32.0981
225.2	23.0711	37.1444	24.641	26.7672	23.9103	28.1962	16.6714	14.8373	12.4629	31.9862
225.65	23.0211	36.8431	24.5178	26.5145	23.8436	28.0575	16.6745	14.8591	12.3758	31.9078
226.1	22.9957	36.6251	24.4764	26.2702	23.7405	27.8959	16.6686	14.8612	12.272	31.8361
226.55	22.9768	36.3908	24.478	25.9739	23.6059	27.8441	16.6604	14.7324	12.1989	31.7759
227	22.9046	36.1718	24.5013	25.6866	23.4724	27.7554	16.5891	14.6087	12.2061	31.6936
227.45	22.8519	35.993	24.5687	25.6465	23.3574	27.7014	16.5065	14.4511	12.2425	31.6152
227.9	22.9072	35.7836	24.4796	25.6244	23.2839	27.6301	16.4066	14.3156	12.2581	31.5177
228.35	22.9721	35.6535	24.3575	25.673	23.2486	27.5009	16.2961	14.2592	12.2335	31.4058
228.8	23.0453	35.5962	24.163	25.7595	23.1914	27.4345	16.2067	14.2076	12.1657	31.3264
229.25	23.1131	35.4929	23.9324	25.7178	23.2154	27.375	16.1556	14.2023	12.1183	31.2662
229.7	22.949	35.3867	23.7662	25.6552	23.2007	27.3452	16.1126	14.2127	12.1558	31.2267
230.15	22.8043	35.2529	23.6157	25.5788	23.1904	27.3044	16.0637	14.1996	12.1939	31.1661
230.6	22.6135	35.0951	23.5168	25.4651	23.2161	27.2071	16.0174	14.1907	12.2418	31.0554
231.05	22.3852	34.9937	23.4472	25.3683	23.0455	27.0595	16.0198	14.1537	12.249	30.9223
231.5	22.2909	34.8971	23.4068	25.2548	22.9247	26.9031	16.0341	14.1248	12.1511	30.7868
231.95	22.1139	34.8235	23.3766	25.1359	22.7768	26.7573	16.0647	14.1132	12.0965	30.6769
232.4	21.9727	34.7279	23.3727	25.0189	22.5738	26.659	16.1219	14.0821	12.0285	30.6192
232.85	21.9128	34.6122	23.3854	24.9018	22.4895	26.6419	16.0063	14.0591	11.9635	30.5807
233.3	21.8472	34.5051	23.4269	24.7763	22.3893	26.6983	15.8872	13.9951	11.931	30.6075
233.75	21.8595	34.3645	23.4388	24.651	22.3101	26.7642	15.7971	13.9386	11.8358	30.6203
234.2	21.8629	34.2459	23.4068	24.5633	22.3017	26.8002	15.6674	13.923	11.7463	30.6212
234.65	21.8536	34.1732	23.3479	24.5006	22.2704	26.7677	15.6677	13.906	11.6814	30.6116
235.1	21.8386	34.2191	23.2085	24.5405	22.2231	26.636	15.6725	13.9291	11.6485	30.4842
235.55	21.7975	34.3301	23.0832	24.5698	22.1766	26.5665	15.6499	13.9441	11.6681	30.3304
236	21.8116	34.4314	22.9951	24.5813	22.1267	26.5103	15.6351	13.9317	11.6927	30.1667
236.45	21.7608	34.4649	22.9153	24.5457	22.1365	26.4882	15.5944	13.9375	11.6937	30.0216
236.9	21.7541	34.2755	22.8721	24.4485	22.1451	26.506	15.5679	13.9362	11.6602	29.9665
237.35	21.7796	34.024	22.8283	24.3932	22.1412	26.3864	15.5131	13.9202	11.5994	29.8775
237.8	21.7302	33.8098	22.7151	24.3178	22.1121	26.2866	15.481	13.8851	11.5426	29.7803
238.25	21.7099	33.6224	22.61	24.2811	21.9986	26.1801	15.4347	13.8239	11.4847	29.6799
238.7	21.6449	33.567	22.5143	24.2248	21.9348	26.0685	15.3866	13.7424	11.382	29.5038
239.15	21.5531	33.5278	22.4198	24.1223	21.8945	26.0395	15.3695	13.6905	11.2559	29.4763
239.6	21.5294	33.4819	22.4117	24.0451	21.8509	25.9798	15.3291	13.6834	11.1085	29.4707
240.05	21.5603	33.4589	22.4097	23.9517	21.8574	25.9296	15.3048	13.6938	10.9902	29.4598
240.5	21.597	33.3987	22.4365	23.8884	21.8035	25.8714	15.228	13.7171	10.9861	29.5077
240.95	21.6461	33.3776	22.4749	23.8558	21.7119	25.7733	15.1562	13.7468	11.0461	29.4908
241.4	21.7314	33.3222	22.4889	23.8105	21.628	25.6994	15.12	13.7326	11.1131	29.4895
241.85	21.7937	33.2428	22.4963	23.8731	21.569	25.6663	15.0671	13.7502	11.1598	29.4914
242.3	21.894	33.2065	22.4521	23.8847	21.5496	25.6467	15.1017	13.7787	11.161	29.5078
242.75	22.0031	33.128	22.4087	23.8932	21.5977	25.6691	15.1194	13.7679	11.1179	29.5398
243.2	22.051	33.0917	22.3211	23.9232	21.6721	25.6728	15.1157	13.8103	11.1026	29.5596
243.65	22.1216	33.0735	22.2327	23.7574	21.7019	25.5822	15.1598	13.7707	11.0674	29.5338
244.1	22.1671	33.0295	22.1706	23.6559	21.7138	25.5873	15.1288	13.728	11.0218	29.4659
244.55	22.1976	32.9961	22.0931	23.5427	21.6866	25.5908	15.1025	13.7201	11.0114	29.3575
245	22.1849	32.954	22.1107	23.4068	21.5184	25.613	15.1063	13.6742	11.0041	29.2622
245.45	22.1345	32.9043	22.1262	23.3679	21.3752	25.7062	15.069	13.6842	11.0581	29.2237
245.9	22.0583	32.8517	22.139	23.3225	21.2233	25.615	15.079	13.7017	11.1075	29.2309
246.35	21.9924	32.7991	22.1526	23.2668	21.0798	25.5027	15.1045	13.7015	11.113	29.2674
246.8	21.9639	32.7283	22.0731	23.2248	21.1528	25.3818	15.0519	13.6859	11.0548	29.264
247.25	21.94	32.6499	22.0013	23.1871	21.2019	25.2344	15.0028	13.6646	10.9539	29.2748
247.7	21.9546	32.5877	21.929	23.1363	21.3044	25.1788	14.921	13.6076	10.8729	29.2291
248.15	21.9653	32.5667	21.8913	23.1193	21.4316	25.1341	14.8099	13.5428	10.9411	29.1868
248.6	21.9543	32.5409	21.8862	23.097	21.4775	25.0725	14.7483	13.5371	11.1048	29.1732
249.05	21.9493	32.5533	21.8806	23.0829	21.5537	25.0125	14.7099	13.5149	11.2931	29.1281
249.5	21.9443	32.582	21.8632	23.0673	21.5875	24.9414	14.694	13.5655	11.4567	29.1405
249.95	21.9465	32.6164	21.8373	23.0709	21.5701	24.8838	14.7423	13.6458	11.3813	29.1343
250.4	22.0046	32.5705	21.857	23.0918	21.5377	24.9192	14.776	13.6919	11.2317	29.1308
250.85	22.0478	32.495	21.885	23.1222	21.4955	24.9328	14.801	13.7834	11.0565	29.1165
251.3	22.0234	32.385	21.9366	23.1644	21.4631	24.9813	14.8413	13.8023	10.9137	29.068
251.75	22.0435	32.189	21.9715	23.1452	21.4247	25.0061	14.8259	13.7745	10.88	28.997
252.2	22.0395	32.1937	21.9465	23.1187	21.3918	24.905	14.8424	13.7445	10.8615	28.9201
252.65	22.0753	32.2167	21.8843	23.0398	21.3127	24.9485	14.8843	13.6812	10.9508	28.874
253.1	22.1373	32.2645	21.8296	22.9473	21.2353	24.9696	14.9088	13.6263	11.0204	28.815
253.55	22.055	32.3726	21.7746	22.8775	21.2134	25.0186	14.9463	13.6333	11.1061	28.8001
254	21.9311	32.3573	21.7314	22.8267	21.1896	25.1392	14.9758	13.6231	11.223	28.7941
254.45	21.7203	32.3315	21.737	22.8294	21.263	25.0586	14.9318	13.6073	11.1392	28.8036
254.9	21.5772	32.2951	21.731	22.8508	21.313	24.9579	14.8827	13.6133	11.0731	28.8722
255.35	21.5675	32.2636	21.6987	22.9051	21.3236	24.8369	14.8446	13.5829	10.9927	28.9147
255.8	21.5872	32.2932	21.7061	22.9202	21.3365	24.7063	14.8948	13.5623	10.8742	28.9515
256.25	21.6684	32.3181	21.6951	22.9067	21.2768	24.6557	14.9832	13.5629	10.8698	28.9385
256.7	21.7117	32.3458	21.6719	22.8862	21.2215	24.622	15.0656	13.5731	10.8321	28.8399
257.15	21.6186	32.3726	21.7064	22.8401	21.169	24.5753	15.1568	13.5229	10.8612	28.7633
257.6	21.522	32.3534	21.6814	22.8528	21.1	24.522	15.0575	13.513	10.9159	28.6613
258.05	21.4129	32.3343	21.6427	22.8829	21.0444	24.4924	14.9881	13.4754	10.9995	28.5995
258.5	21.3176	32.2913	21.6096	22.9042	21.0622	24.4817	14.9518	13.4238	11.1187	28.5628
258.95	21.3764	32.2492	21.5397	22.9386	21.1226	24.5294	14.8752	13.4861	11.1239	28.5014
259.4	21.4527	32.2052	21.4981	22.8946	21.1946	24.5685	14.9149	13.511	11.1353	28.4727
259.85	21.5172	32.145	21.4495	22.8471	21.3151	24.5957	14.9009	13.5674	11.0695	28.4243
260.3	21.5679	32.1106	21.4431	22.8193	21.3576	24.6338	14.8823	13.6026	10.964	28.4887
260.75	21.5694	32.0235	21.4636	22.7822	21.3748	24.6362	14.8947	13.6101	10.9403	28.5958
261.2	21.5859	31.9518	21.4713	22.7771	21.4397	24.6119	14.8623	13.6227	10.9084	28.728
261.65	21.6347	31.905	21.537	22.7479	21.4412	24.5738	14.8637	13.6438	10.9442	28.8549
262.1	21.6466	31.8438	21.5463	22.7219	21.4793	24.5277	14.832	13.791	11.0282	28.8759
262.55	21.6649	31.8304	21.5324	22.6838	21.4785	24.4866	14.7752	13.9157	11.0951	28.8611
263	21.6437	31.8179	21.5749	22.6701	21.4162	24.4471	14.7439	14.0518	11.1528	28.8324
263.45	21.6267	31.8113	21.5558	22.7141	21.3889	24.4143	14.7503	14.1363	11.1671	28.8083
263.9	21.652	31.8562	21.5742	22.7206	21.3476	24.3665	14.7574	14.0361	11.1478	28.7996
264.35	21.6579	31.8772	21.6064	22.7373	21.3168	24.3121	14.8077	13.9244	11.0818	28.8064
264.8	21.6814	31.8744	21.5867	22.7181	21.2888	24.3804	14.8442	13.8188	11.0242	28.7676
265.25	21.6891	31.8342	21.6562	22.6217	21.2608	24.4632	14.7985	13.7427	10.9718	28.7208
265.7	21.7021	31.6803	21.705	22.5204	21.205	24.5411	14.7769	13.7446	10.9255	28.6853
266.15	21.7231	31.5177	21.7428	22.4287	21.236	24.6437	14.7271	13.7772	10.9646	28.6384
266.6	21.7682	31.4441	21.7919	22.3691	21.3	24.655	14.7197	13.828	10.9999	28.6425
267.05	21.7907	31.424	21.7206	22.3791	21.3179	24.6581	14.7612	13.8983	11.0622	28.7096
267.5	21.7951	31.5177	21.6673	22.4454	21.3789	24.6572	14.7677	13.9695	11.1402	28.781
267.95	21.7998	31.6927	21.6208	22.4818	21.3687	24.6117	14.6745	14.0219	11.1236	28.8625
268.4	21.7913	31.7453	21.549	22.5227	21.3384	24.6047	14.5346	14.0057	11.1065	28.9028
268.85	21.8705	31.7673	21.5352	22.5321	21.3754	24.5879	14.3941	13.9999	11.0634	28.8642
269.3	21.9761	31.7644	21.4945	22.5279	21.4272	24.5885	14.2828	14.01	11.0102	28.8886
269.75	22.084	31.6955	21.3959	22.5471	21.4771	24.5707	14.3974	14.013	11.0289	28.9027
270.2	22.1715	31.6841	21.3366	22.5489	21.5317	24.5078	14.5283	14.0677	11.0562	28.9319
270.65	22.1692	31.7051	21.2898	22.5817	21.5419	24.4548	14.6713	14.0809	11.1368	29.0113
271.1	22.145	31.7099	21.2734	22.571	21.4786	24.4004	14.829	14.0717	11.2055	28.9552
271.55	22.1128	31.752	21.3803	22.5804	21.4424	24.3456	14.8496	14.0907	11.2461	28.8951
272	22.1116	31.7979	21.4631	22.5606	21.4053	24.2992	14.887	14.0894	11.2688	28.85
272.45	22.1216	31.8055	21.5468	22.5123	21.3955	24.2751	14.9162	14.1121	11.2146	28.8061
272.9	22.1047	31.8266	21.6074	22.5144	21.5549	24.2544	14.9596	14.1789	11.1761	28.8096
273.35	22.1399	31.8093	21.6152	22.5039	21.6995	24.3608	15.0337	14.2342	11.1512	28.8057
273.8	22.1535	31.7615	21.6931	22.5142	21.8664	24.4823	15.0933	14.279	11.1417	28.7716
274.25	22.1727	31.7692	21.7524	22.5063	22.0188	24.5844	15.1441	14.2968	11.1692	28.6692
274.7	22.2561	31.7768	21.8144	22.4675	21.9461	24.6968	15.1418	14.2527	11.211	28.5895
275.15	22.2627	31.7711	21.8508	22.4037	21.8636	24.7435	15.1065	14.2173	11.2434	28.5446
275.6	22.2768	31.8046	21.8176	22.3877	21.7378	24.7866	15.0791	14.219	11.2717	28.5478
276.05	22.3109	31.7787	21.7787	22.4198	21.617	24.8386	15.0451	14.2444	11.3085	28.5948
276.5	22.2788	31.7501	21.7389	22.491	21.6288	24.8798	15.0199	14.3108	11.343	28.6354
276.95	22.2558	31.7998	21.7444	22.6028	21.66	24.9008	15.0043	14.3437	11.3575	28.6835
277.4	22.1582	31.8505	21.759	22.6904	21.7105	24.9294	15.0114	14.3544	11.3974	28.6893
277.85	22.0664	31.9145	21.7917	22.7538	21.7621	24.9484	15.0477	14.3385	11.4329	28.6945
278.3	22.0346	31.9566	21.8431	22.7472	21.7586	24.9456	15.1154	14.3268	11.4514	28.7192
278.75	22.0357	31.9308	21.8379	22.7281	21.7564	24.9681	15.2147	14.3767	11.5059	28.7061
279.2	22.153	31.9011	21.8305	22.6796	21.7967	24.9684	15.2523	14.4049	11.5256	28.7339
279.65	22.2461	31.8811	21.8426	22.6266	21.8274	24.9693	15.2684	14.4862	11.4733	28.7547
280.1	22.29	31.9375	21.8493	22.6313	21.9326	24.9771	15.2627	14.5457	11.4165	28.7386
280.55	22.3221	32.0513	21.8835	22.6232	22.0166	24.9395	15.2248	14.5428	11.3544	28.7515
281	22.3351	32.1765	21.9564	22.6652	22.0416	24.9375	15.2223	14.6147	11.3191	28.7505
281.45	22.3577	32.1832	21.9457	22.7288	22.063	24.921	15.2018	14.67	11.4313	28.7998
281.9	22.4835	32.1106	21.9222	22.7816	21.9911	24.9141	15.1905	14.7283	11.565	28.8909
282.35	22.6464	31.9767	21.9109	22.8249	21.9415	24.9314	15.1764	14.8332	11.6872	28.9703
282.8	22.7736	31.8151	21.842	22.838	21.9252	24.9133	15.1667	14.8651	11.7969	29.0255
283.25	22.908	31.8887	21.8784	22.8416	21.9259	24.9427	15.1932	14.8912	11.8145	29.0489
283.7	22.9219	31.991	21.9095	22.8498	21.9861	24.9945	15.2185	14.9477	11.8045	29.027
284.15	22.8721	32.1469	21.9233	22.8908	22.0322	25.0759	15.3065	14.973	11.7965	29.0263
284.6	22.8368	32.2951	21.9728	22.9457	22.0354	25.1811	15.3786	15.0311	11.7369	29.068
285.05	22.7963	32.3324	21.9685	23.0021	22.0536	25.2483	15.3745	15.0616	11.7042	29.1045
285.5	22.7754	32.3735	22.0404	23.0316	22.0443	25.2923	15.3626	15.0408	11.6868	29.1755
285.95	22.6772	32.3582	22.1357	23.0657	22.0573	25.2793	15.2742	15.0319	11.6789	29.1963
286.4	22.5765	32.3783	22.2242	23.0844	22.1123	25.2781	15.2319	15.0408	11.7707	29.1728
286.85	22.4932	32.3831	22.328	23.0923	22.1338	25.2616	15.3257	15.0493	11.8442	29.1716
287.3	22.446	32.3582	22.3538	23.1324	22.1894	25.2558	15.4371	15.0897	11.9275	29.189
287.75	22.6342	32.3611	22.3418	23.1468	22.2142	25.2855	15.6004	15.1373	11.9877	29.234
288.2	22.8291	32.342	22.3497	23.1509	22.2353	25.2751	15.7168	15.1711	11.9982	29.3406
288.65	22.9981	32.3515	22.3677	23.1624	22.206	25.3314	15.7411	15.2706	12.0302	29.4375
289.1	23.1542	32.4089	22.3932	23.1912	22.156	25.3771	15.7741	15.3593	12.0388	29.517
289.55	23.1805	32.4768	22.4577	23.2665	22.1331	25.4145	15.7931	15.4447	12.0875	29.6129
290	23.2045	32.5552	22.4946	23.362	22.1076	25.4563	15.9028	15.5033	12.1418	29.6411
290.45	23.2408	32.6174	22.497	23.45	22.2313	25.4378	16.0222	15.5254	12.1557	29.6502
290.9	23.2516	32.6547	22.5155	23.4864	22.3701	25.4924	16.0896	15.5581	12.2028	29.6696
291.35	23.2512	32.6776	22.5151	23.4441	22.5198	25.5707	16.1568	15.5813	12.2068	29.6927
291.8	23.2417	32.6719	22.511	23.3931	22.7098	25.6675	16.0644	15.6196	12.2067	29.746
292.25	23.2167	32.6757	22.5457	23.3592	22.8047	25.7821	15.9814	15.6436	12.2324	29.8316
292.7	23.2197	32.6461	22.5799	23.3644	22.8605	25.7909	15.9433	15.6661	12.2536	29.858
293.15	23.2285	32.6203	22.5792	23.403	22.8692	25.7916	15.8907	15.6604	12.3137	29.849
293.6	23.2042	32.6116	22.5796	23.4585	22.7831	25.7929	15.9047	15.6655	12.3538	29.8045
294.05	23.2082	32.5753	22.5585	23.5643	22.7048	25.7834	15.9147	15.6769	12.4104	29.7026
294.5	23.2078	32.5629	22.5358	23.6465	22.6641	25.7825	15.9463	15.669	12.4438	29.6621
294.95	23.221	32.5562	22.5794	23.7419	22.6665	25.7478	15.9901	15.7267	12.4593	29.6468
295.4	23.2873	32.5667	22.653	23.8187	22.7403	25.7184	16.0564	15.7671	12.5275	29.6918
295.85	23.3081	32.5801	22.7132	23.7793	22.8309	25.7123	16.1489	15.7999	12.5713	29.7867
296.3	23.3207	32.5877	22.7824	23.7398	22.8707	25.7582	16.1918	15.8606	12.6413	29.8683
296.75	23.3593	32.6948	22.8386	23.708	22.87	25.8483	16.229	15.8763	12.7087	29.9557
297.2	23.4039	32.7914	22.8325	23.7058	22.8629	25.9529	16.2588	15.8833	12.7389	30.0014
297.65	23.5473	32.9454	22.8458	23.7515	22.8504	26.0467	16.2492	15.9147	12.7936	30.0372
298.1	23.7044	33.1778	22.8108	23.7963	22.9162	26.1064	16.243	15.9564	12.7903	30.0707
298.55	23.7815	33.1825	22.7402	23.8182	22.9968	26.149	16.245	16.0012	12.7916	30.0723
299	23.8475	33.1778	22.7348	23.7776	23.0633	26.1378	16.2524	16.1082	12.7988	30.0647
299.45	23.8004	33.1252	22.762	23.7463	23.1387	26.1851	16.247	16.2132	12.7932	30.061
299.9	23.7594	32.9989	22.83	23.747	23.1711	26.2711	16.265	16.3092	12.8585	30.0569
300.35	23.7897	33.0209	22.9459	23.7723	23.2573	26.3528	16.2824	16.4284	12.9003	30.0939
300.8	23.822	33.0573	23.0551	23.8334	23.3566	26.4742	16.3025	16.4774	12.9465	30.1045
301.25	23.9336	33.0697	23.1187	23.8988	23.4053	26.4723	16.3794	16.4883	12.9856	30.105
301.7	24.0298	33.1079	23.2409	23.9539	23.4851	26.4218	16.4461	16.4611	12.9932	30.0768
302.15	24.1606	33.1462	23.3416	23.9822	23.4892	26.3814	16.4873	16.393	13.0575	30.0224
302.6	24.281	33.2017	23.452	24.1103	23.4607	26.3191	16.531	16.3568	13.0877	30.1135
303.05	24.3445	33.304	23.5647	24.2364	23.4822	26.347	16.5609	16.378	13.1194	30.2347
303.5	24.4481	33.3709	23.5608	24.3517	23.4752	26.4032	16.611	16.4236	13.1616	30.3991
303.95	24.445	33.4168	23.5319	24.492	23.5101	26.4391	16.7176	16.5329	13.144	30.5666
304.4	24.4124	33.4426	23.4601	24.4604	23.5683	26.5332	16.7948	16.6525	13.1872	30.6355
304.85	24.392	33.4618	23.3687	24.4307	23.5922	26.5891	16.8789	16.7286	13.2306	30.6936
305.3	24.2827	33.4981	23.3285	24.408	23.6086	26.6479	16.9483	16.8394	13.2749	30.7482
305.75	24.2242	33.5249	23.3411	24.3509	23.637	26.7536	16.9398	16.9069	13.3279	30.7994
306.2	24.2373	33.5469	23.3702	24.3815	23.6905	26.8025	16.9469	16.952	13.3268	30.8606
306.65	24.261	33.5823	23.4637	24.4292	23.7914	26.8742	16.9238	17.0183	13.3332	30.8869
307.1	24.3644	33.6224	23.5796	24.4766	23.9212	26.9257	16.8907	17.0434	13.4238	30.881
307.55	24.4614	33.6779	23.6354	24.5677	24.0057	26.8951	16.9204	17.0784	13.565	30.8857
308	24.4864	33.7333	23.6848	24.6421	24.0349	26.9545	16.9866	17.1314	13.765	30.8987
308.45	24.5338	33.741	23.696	24.697	24.0318	27.0121	17.0612	17.1477	13.9588	30.9345
308.9	24.5354	33.7764	23.6943	24.7388	24.0322	27.1152	17.1166	17.179	13.9745	31.0005
309.35	24.5938	33.8032	23.7315	24.7761	24.0599	27.2813	17.1636	17.1984	13.9395	31.0587
309.8	24.6748	33.8318	23.7841	24.8463	24.1333	27.2908	17.1705	17.2658	13.882	31.0865
310.25	24.7447	33.894	23.8305	24.9143	24.2211	27.282	17.1736	17.38	13.8457	31.1197
310.7	24.8852	33.9409	23.8809	24.9884	24.2572	27.2438	17.2339	17.4771	13.9042	31.1632
311.15	24.9395	34.0604	23.9143	25.0497	24.3104	27.2034	17.2681	17.6018	13.9819	31.2319
311.6	25.0328	34.2182	23.953	25.0517	24.3496	27.2389	17.2163	17.6175	14.0515	31.3208
312.05	25.0802	34.2794	24.0035	25.0563	24.3835	27.2832	17.1965	17.6102	14.0886	31.4027
312.5	25.0546	34.3291	24.0268	25.0787	24.4512	27.3004	17.1325	17.6113	14.1053	31.4624
312.95	25.0728	34.2755	24.0612	25.1123	24.478	27.3207	17.1025	17.5876	14.1279	31.5367
313.4	25.074	34.1608	24.0872	25.2021	24.5972	27.3496	17.2581	17.6258	14.1228	31.6256
313.85	25.2072	34.2143	24.127	25.2987	24.714	27.3786	17.3819	17.6785	14.1357	31.7067
314.3	25.3439	34.2717	24.1916	25.4517	24.8272	27.4932	17.5272	17.8024	14.1538	31.7926
314.75	25.4453	34.3396	24.2716	25.5592	24.9573	27.5807	17.6445	17.9183	14.1554	31.8315
315.2	25.5135	34.4639	24.3644	25.6467	24.9119	27.6634	17.6646	18.0038	14.1728	31.8448
315.65	25.402	34.5318	24.4229	25.7199	24.881	27.7607	17.6877	18.0682	14.199	31.8568
316.1	25.3252	34.5797	24.4754	25.664	24.843	27.7537	17.6985	18.0028	14.2589	31.8541
316.55	25.266	34.6514	24.473	25.67	24.7885	27.7983	17.7067	17.9811	14.3584	31.8638
317	25.189	34.6638	24.4487	25.6633	24.8168	27.8825	17.7332	17.9912	14.4696	31.9164
317.45	25.2247	34.659	24.4724	25.6555	24.7125	27.9412	17.7671	18.0977	14.5555	32.0159
317.9	25.2624	34.6829	24.5036	25.7007	24.6581	28.03	17.7955	18.2666	14.5893	32.1775
318.35	25.3096	34.7145	24.6058	25.7158	24.6344	28.0559	17.8673	18.4037	14.5731	32.3382
318.8	25.4342	34.8053	24.7209	25.7432	24.5898	28.0267	17.9256	18.526	14.57	32.4382
319.25	25.5187	34.8952	24.8051	25.8118	24.7707	28.0276	17.9978	18.4927	14.5765	32.4913
319.7	25.5493	34.986	24.8916	25.8702	24.8962	28.0663	18.0842	18.471	14.6181	32.4384
320.15	25.5877	35.0912	24.9401	25.9234	25.0169	28.1167	18.1223	18.4576	14.6636	32.4036
320.6	25.5858	35.1553	24.9352	25.9658	25.167	28.2037	18.1601	18.4439	14.6889	32.4231
321.05	25.6177	35.2213	24.9157	25.9673	25.2005	28.2574	18.067	18.5117	14.7224	32.4569
321.5	25.7061	35.2376	24.9005	26.0258	25.2294	28.2691	17.9971	18.5573	14.7517	32.5654
321.95	25.7867	35.2404	24.8855	26.0993	25.3054	28.3016	17.9406	18.5776	14.7912	32.647
322.4	25.8414	35.2385	24.9753	26.2229	25.3863	28.3197	17.8936	18.5955	14.8009	32.692
322.85	25.8433	35.205	25.0927	26.3604	25.4856	28.3847	18.0641	18.5934	14.8174	32.735
323.3	25.8274	35.228	25.1923	26.4307	25.5984	28.4841	18.1776	18.5881	14.8313	32.7771
323.75	25.8049	35.2481	25.3278	26.5121	25.5933	28.569	18.2879	18.6201	14.852	32.8182
324.2	25.82	35.2882	25.3926	26.5251	25.5715	28.6393	18.3893	18.6364	14.9347	32.8612
324.65	25.8631	35.3781	25.4679	26.5376	25.5437	28.6627	18.385	18.6598	14.9846	32.8947
325.1	25.8611	35.4479	25.5164	26.5983	25.547	28.6187	18.4145	18.7095	15.1048	32.8823
325.55	25.996	35.4929	25.487	26.6396	25.6452	28.5916	18.4639	18.7441	15.2187	32.91
326	26.1214	35.5206	25.4961	26.7146	25.7569	28.5687	18.5931	18.8457	15.2937	32.9578
326.45	26.245	35.5044	25.4535	26.7863	25.8564	28.588	18.7082	18.9447	15.4138	33.042
326.9	26.4522	35.4795	25.4682	26.8514	25.9118	28.7319	18.8275	18.9981	15.3856	33.1605
327.35	26.4262	35.4412	25.5591	26.8883	25.92	28.8603	18.9283	19.0417	15.3713	33.2217
327.8	26.4014	35.5149	25.6134	26.9014	25.8855	28.9832	18.8715	19.024	15.3634	33.2734
328.25	26.3884	35.6373	25.686	26.9017	25.8817	29.0696	18.8416	19.0005	15.294	33.2543
328.7	26.3272	35.7922	25.7436	26.835	25.8797	29.0392	18.8073	19.0377	15.2848	33.2332
329.15	26.3595	36.0093	25.7723	26.7858	25.9311	28.9771	18.7746	19.0609	15.2611	33.2667
329.6	26.3849	36.0571	25.8183	26.7783	26.0226	28.9099	18.8153	19.0808	15.2887	33.2648
330.05	26.4053	36.059	25.8887	26.7992	26.0792	28.8413	18.8237	19.1092	15.356	33.2916
330.5	26.435	36.0227	25.8974	26.8878	26.1628	28.8544	18.8503	19.1008	15.4332	33.3049
330.95	26.474	35.9624	25.8948	27.0351	26.1715	28.9183	18.8749	19.1387	15.5157	33.2896
331.4	26.5098	35.9787	25.8564	27.1686	26.1897	29.0254	18.9147	19.2286	15.5001	33.3269
331.85	26.5283	36.0045	25.8109	27.2793	26.2055	29.1691	18.9912	19.3359	15.493	33.4025
332.3	26.5298	36.06	25.8322	27.4021	26.2269	29.2766	19.0099	19.454	15.5033	33.5105
332.75	26.5507	36.1154	25.8608	27.4425	26.2861	29.3873	19.0237	19.5544	15.5092	33.6167
333.2	26.5776	36.1776	25.955	27.4714	26.3069	29.4632	19.0188	19.5966	15.5609	33.7238
333.65	26.6465	36.2694	26.0468	27.5069	26.3353	29.552	18.9944	19.6045	15.5786	33.7812
334.1	26.7552	36.342	26.1182	27.4998	26.3415	29.6099	18.9881	19.6192	15.5827	33.807
334.55	26.7959	36.3813	26.1929	27.5163	26.3657	29.6516	19.0151	19.618	15.5925	33.8682
335	26.8465	36.3736	26.2114	27.5299	26.4061	29.709	19.0408	19.6433	15.6053	33.9045
335.45	26.8141	36.3449	26.2646	27.5366	26.4743	29.6699	19.0372	19.6908	15.6498	33.9896
335.9	26.7652	36.366	26.3568	27.5421	26.5521	29.6884	19.0789	19.7142	15.6777	34.0872
336.35	26.7809	36.4625	26.4417	27.5953	26.5953	29.6984	19.0795	19.7333	15.7081	34.1139
336.8	26.7517	36.6241	26.5564	27.6338	26.6613	29.6984	19.1032	19.7319	15.7389	34.1168
337.25	26.9127	36.7791	26.5865	27.6677	26.6798	29.7789	19.1822	19.719	15.7771	34.0881
337.7	27.0623	36.8412	26.5689	27.7204	26.688	29.8212	19.2276	19.7221	15.8334	34.047
338.15	27.2111	36.8766	26.5323	27.7129	26.7223	29.8859	19.291	19.7429	15.8744	34.0365
338.6	27.4013	36.8651	26.4783	27.7208	26.7247	29.948	19.3465	19.8048	15.9331	34.0757
339.05	27.3232	36.868	26.473	27.7588	26.772	29.9915	19.3769	19.8817	15.9406	34.1665
339.5	27.2111	36.9015	26.4624	27.7843	26.8233	30.0508	19.4058	19.9643	15.9361	34.2612
339.95	27.0706	36.8948	26.497	27.8267	26.8585	30.1058	19.4499	20.045	15.9324	34.3741
340.4	26.9016	36.9206	26.5355	27.889	26.9034	30.154	19.4828	20.0843	15.8967	34.4773
340.85	26.8788	36.9435	26.5746	27.8825	26.919	30.1923	19.5053	20.1211	15.8969	34.5031
341.3	26.9182	37.0153	26.6358	27.8898	26.9442	30.2251	19.506	20.1117	15.9073	34.6437
341.75	26.9476	37.1061	26.6779	27.9031	26.9789	30.2162	19.4673	20.0915	15.9244	34.7795
342.2	27.0134	37.1826	26.7356	27.8878	27.0193	30.3303	19.4011	20.0858	15.9457	34.8761
342.65	27.0711	37.2687	26.7817	27.9653	27.0955	30.4446	19.3736	20.0633	15.9704	34.9908
343.1	27.1084	37.3404	26.7985	28.0172	27.1622	30.5637	19.3642	20.0944	15.9929	34.8962
343.55	27.1781	37.4418	26.786	28.0663	27.2291	30.7064	19.3726	20.1275	16.0168	34.7891
344	27.241	37.48	26.7271	28.1209	27.2871	30.6308	19.4218	20.2722	16.0413	34.7154
344.45	27.3285	37.4016	26.6989	28.1211	27.2902	30.5579	19.4417	20.4227	16.0492	34.6629
344.9	27.3716	37.3041	26.7164	28.0754	27.2829	30.4535	19.4851	20.5575	16.0584	34.7107
345.35	27.406	37.1453	26.7752	28.0345	27.2664	30.3565	19.519	20.7046	16.0579	34.7709
345.8	27.4293	37.1042	26.8941	28.0075	27.2549	30.3837	19.5654	20.6365	16.0728	34.8111
346.25	27.385	37.2735	26.9707	27.9903	27.3108	30.4177	19.6082	20.5549	16.1038	34.8302
346.7	27.3762	37.4475	27.0382	28.1211	27.3717	30.4981	19.6463	20.4807	16.122	34.8464
347.15	27.3681	37.6531	27.0477	28.2421	27.4197	30.5784	19.7055	20.386	16.1424	34.8847
347.6	27.3788	37.8118	27.028	28.3721	27.4533	30.6374	19.7259	20.3838	16.068	34.9315
348.05	27.4101	37.8118	27.0316	28.491	27.4088	30.7197	19.7412	20.4008	15.9934	34.966
348.5	27.4484	37.7956	26.9939	28.5217	27.3588	30.7808	19.7503	20.4176	15.9291	35.0004
348.95	27.4468	37.7525	27.0396	28.5586	27.3451	30.8353	19.7406	20.421	15.8837	34.9775
349.4	27.4014	37.6904	27.0766	28.5467	27.3505	30.8598	19.7497	20.4232	16.0101	34.9641
349.85	27.382	37.6904	27.0928	28.5692	27.408	30.8391	19.7597	20.4062	16.1072	34.9603
350.3	27.3518	37.6952	27.1513	28.6135	27.4897	30.818	19.7386	20.3576	16.1925	34.9641
350.75	27.3434	37.7172	27.1434	28.6599	27.6464	30.8941	19.7285	20.346	16.2655	34.9909
351.2	27.3727	37.7535	27.1334	28.7254	27.7893	30.9951	19.7088	20.3728	16.2527	34.9966
351.65	27.3627	37.7803	27.1377	28.7514	27.9158	31.1063	19.674	20.4507	16.2685	35.053
352.1	27.343	37.7898	27.1118	28.7343	28.0107	31.1987	19.6692	20.5441	16.2168	35.0587
352.55	27.3295	37.8281	27.1324	28.6637	27.8956	31.0971	19.6331	20.6248	16.1394	35.0759
353	27.2892	37.8434	27.1964	28.6044	27.7679	31.0105	19.6063	20.6577	16.0527	35.1238
353.45	27.2885	37.8596	27.2886	28.5633	27.6268	30.9305	19.6408	20.6033	15.9585	35.1171
353.9	27.3153	37.9266	27.4046	28.5371	27.5124	30.8603	19.6796	20.555	16.0247	35.1811
354.35	27.3964	37.9859	27.4759	28.6201	27.5062	30.9035	19.7774	20.4931	16.1225	35.2299
354.8	27.4728	38.0614	27.4531	28.7028	27.5257	30.9214	19.8615	20.4277	16.2176	35.2347
355.25	27.509	38.1226	27.374	28.7645	27.5603	30.9195	19.8898	20.4156	16.2873	35.2586
355.7	27.5079	38.1571	27.271	28.8362	27.5844	30.9443	19.8969	20.3963	16.2864	35.2347
356.15	27.4344	38.1704	27.1804	28.8016	27.6158	30.9656	19.8627	20.3038	16.2696	35.2223
356.6	27.3535	38.1714	27.1844	28.7527	27.6559	31.0345	19.8377	20.2506	16.2614	35.2232
357.05	27.3188	38.1523	27.2202	28.7167	27.6829	31.1695	19.8676	20.1956	16.2616	35.2289
357.5	27.3001	38.0834	27.2644	28.6761	27.7117	31.2618	19.9056	20.1179	16.241	35.227
357.95	27.2889	38.0308	27.3266	28.6795	27.7629	31.3141	19.9494	20.206	16.2226	35.1859
358.4	27.3184	37.9954	27.3573	28.6969	27.7759	31.3226	19.9963	20.2766	16.1719	35.1391
358.85	27.3219	37.9658	27.3238	28.7387	27.8082	31.2598	19.9442	20.3735	16.1645	35.075
359.3	27.3143	37.9964	27.2822	28.7643	27.8094	31.2568	19.9018	20.4845	16.1586	35.0396
359.75	27.3279	37.9371	27.2088	28.7988	27.7346	31.2568	19.8745	20.4968	16.1407	35.0511
360.2	27.3029	37.8157	27.1242	28.8582	27.7001	31.2549	19.8876	20.4995	16.1599	35.0023
360.65	27.2437	37.809	27.1408	28.8652	27.6498	31.2499	19.9613	20.4474	16.1234	34.9593
361.1	27.2213	37.8864	27.1843	28.9202	27.6157	31.1498	20.0005	20.3964	16.107	34.8933
361.55	27.1773	38.0815	27.2741	28.9543	27.6457	31.0947	19.9976	20.3477	16.2055	34.7939
362	27.1776	38.3579	27.3502	28.929	27.6345	31.0702	19.9386	20.2966	16.3108	34.8656
362.45	27.2414	38.4621	27.3814	28.9312	27.5781	31.079	19.866	20.2497	16.4369	34.921
362.9	27.2759	38.3923	27.3936	28.8828	27.5259	31.1372	19.8091	20.224	16.5205	35.0119
363.35	27.3148	38.2804	27.3708	28.8311	27.4487	31.1684	19.7755	20.2194	16.407	35.1572
363.8	27.3355	38.1245	27.3833	28.8161	27.3933	31.1832	19.6969	20.2418	16.2754	35.2098
364.25	27.3143	38.0356	27.4001	28.8272	27.4237	31.1706	19.66	20.2968	16.1485	35.2758
364.7	27.3378	37.9926	27.4069	28.8475	27.4715	31.1657	19.6658	20.3541	16.0657	35.3389
365.15	27.3651	37.9706	27.4151	28.908	27.5246	31.1729	19.7058	20.3907	16.0844	35.3437
365.6	27.3775	37.9916	27.418	28.9489	27.5731	31.1502	19.8242	20.4059	16.105	35.3428
366.05	27.3983	38.0375	27.402	28.9262	27.5985	31.1715	19.8888	20.4053	16.1051	35.3533
366.5	27.2969	38.1083	27.3694	28.9014	27.5811	31.1927	19.9075	20.3831	16.0714	35.3437
366.95	27.1908	38.1695	27.3505	28.8328	27.5649	31.1807	19.8956	20.3633	16.0507	35.3418
367.4	27.0742	38.1953	27.3166	28.7777	27.5567	31.1852	19.8453	20.3274	16.0397	35.3102
367.85	26.9675	38.1829	27.2958	28.7639	27.5353	31.1923	19.8266	20.2772	16.0348	35.2596
368.3	26.9751	38.1819	27.3345	28.7616	27.5708	31.2122	19.8087	20.2271	16.0535	35.1955
368.75	26.9796	38.1398	27.3524	28.7932	27.5983	31.2693	19.7871	20.1924	16.0185	35.1725
369.2	27.0771	38.0777	27.3518	28.8152	27.5808	31.3334	19.7713	20.1633	15.9717	35.2022
369.65	27.1905	38.048	27.3586	28.8591	27.5304	31.3412	19.7332	20.1622	15.9679	35.2318
370.1	27.277	37.9888	27.3223	28.899	27.4312	31.3256	19.6754	20.1724	15.9503	35.2796
370.55	27.3813	37.9572	27.3259	28.9214	27.363	31.2888	19.6406	20.1817	15.9755	35.2653
371	27.3416	37.9629	27.3602	28.9329	27.4575	31.2379	19.6093	20.2113	16.0584	35.2634
371.45	27.2367	37.9658	27.4027	28.8812	27.5968	31.2061	19.5535	20.2192	16.1001	35.2672
371.9	27.1006	38.0031	27.4466	28.8252	27.7577	31.1834	19.5449	20.2038	16.1556	35.2596
372.35	26.9578	38.0404	27.4427	28.7225	27.8795	31.1605	19.4968	20.1711	16.2104	35.2997
372.8	26.8763	38.0825	27.4292	28.6581	27.7819	31.1539	19.4649	20.1469	16.1548	35.2557
373.25	26.7484	38.0576	27.3702	28.6289	27.6851	31.1349	19.5137	20.1536	16.1237	35.2357
373.7	26.6614	38.026	27.3177	28.5712	27.5799	31.1294	19.557	20.1856	16.0719	35.207
374.15	26.594	37.9926	27.259	28.5818	27.4785	31.1596	19.6295	20.2229	15.9949	35.141
374.6	26.5161	37.9409	27.1964	28.5495	27.4741	31.1854	19.6825	20.222	15.9569	35.118
375.05	26.6392	37.9658	27.1678	28.508	27.4602	31.2334	19.6978	20.1712	15.8994	35.0549
375.5	26.728	37.939	27.1404	28.5306	27.4891	31.2025	19.6834	20.1011	15.8851	34.9889
375.95	26.774	37.9247	27.1537	28.5354	27.5171	31.1352	19.6525	20.0313	15.8679	34.9478
376.4	26.8536	37.9056	27.162	28.5311	27.5222	31.0409	19.6357	19.967	15.8581	34.901
376.85	26.8152	37.786	27.1841	28.5474	27.4985	30.9618	19.6071	19.9221	15.8346	34.8837
377.3	26.7876	37.7277	27.2086	28.5529	27.4149	30.9529	19.6082	19.9061	15.7529	34.9048
377.75	26.8761	37.656	27.2153	28.5257	27.3675	30.9403	19.62	19.9014	15.7181	34.9383
378.2	26.9286	37.5919	27.229	28.6151	27.3607	30.9227	19.6183	19.9372	15.7093	34.9555
378.65	26.9893	37.6847	27.214	28.6826	27.3496	30.8604	19.6008	19.971	15.7339	34.9354
379.1	27.0614	37.764	27.2063	28.6944	27.3432	30.7918	19.5348	19.9774	15.7873	34.8809
379.55	26.9474	37.8405	27.1716	28.7361	27.3029	30.7159	19.4401	19.9597	15.7954	34.7499
380	26.85	37.8817	27.151	28.6332	27.2134	30.7353	19.3267	19.9197	15.7882	34.6609
380.45	26.7548	37.8625	27.1248	28.5281	27.1655	30.7713	19.233	19.9016	15.742	34.5902
380.9	26.6484	37.7946	27.0646	28.4746	27.1327	30.8019	19.1908	19.8429	15.6894	34.528
381.35	26.6257	37.72	27.0195	28.3878	27.1036	30.8669	19.189	19.7904	15.6517	34.506
381.8	26.6277	37.6675	26.946	28.3452	27.0971	30.8623	19.2481	19.7184	15.5905	34.4458
382.25	26.6044	37.5642	26.9039	28.2522	27.1103	30.8596	19.3249	19.6071	15.5689	34.3836
382.7	26.6037	37.5192	26.8585	28.1266	27.1527	30.8552	19.3737	19.5758	15.5352	34.3262
383.15	26.5765	37.4944	26.8491	28.0454	27.1897	30.8263	19.3931	19.5714	15.5302	34.3358
383.6	26.5055	37.4743	26.9497	27.9918	27.2274	30.7899	19.3559	19.6074	15.573	34.3769
384.05	26.4612	37.4953	27.0195	28.089	27.1856	30.7625	19.2989	19.6975	15.5938	34.4219
384.5	26.3815	37.4905	27.1267	28.1966	27.1002	30.7401	19.2725	19.7549	15.6289	34.4735
384.95	26.3941	37.4446	27.2229	28.288	27.0248	30.6859	19.2773	19.7906	15.6643	34.4735
385.4	26.4326	37.4265	27.1113	28.3642	26.9533	30.6657	19.3011	19.7945	15.6526	34.4725
385.85	26.4596	37.3882	26.9916	28.3339	26.9348	30.6317	19.2825	19.7338	15.6606	34.484
386.3	26.5023	37.37	26.8599	28.3137	26.906	30.5984	19.2307	19.6757	15.6682	34.484
386.75	26.4474	37.3806	26.6974	28.2977	26.805	30.6114	19.1074	19.603	15.6141	34.484
387.2	26.3452	37.3385	26.6449	28.2523	26.7102	30.5873	18.9783	19.517	15.5775	34.4706
387.65	26.2447	37.3031	26.6255	28.2115	26.5835	30.5816	18.908	19.4917	15.5095	34.4458
388.1	26.1687	37.241	26.6086	28.1638	26.4942	30.5692	18.87	19.483	15.4402	34.3922
388.55	26.1319	37.175	26.6024	28.0934	26.5615	30.5536	18.9581	19.5013	15.4141	34.3549
389	26.1542	37.1243	26.6019	28.0637	26.6063	30.5227	19.0701	19.5232	15.4122	34.3004
389.45	26.1505	37.0679	26.5826	28.0447	26.6948	30.4867	19.182	19.5272	15.4415	34.2526
389.9	26.1047	37.0401	26.5443	28.0093	26.7867	30.4633	19.259	19.4875	15.4806	34.2755
390.35	26.0593	37.0239	26.5172	27.9655	26.782	30.4351	19.2298	19.4331	15.4764	34.2545
390.8	25.9856	37.0277	26.4812	27.9099	26.7654	30.4469	19.1817	19.4027	15.43	34.2373
391.25	25.9818	37.0411	26.4554	27.8577	26.7079	30.434	19.1296	19.3623	15.3574	34.2057
391.7	26.014	37.0114	26.426	27.8203	26.6013	30.3846	19.087	19.3607	15.2838	34.0891
392.15	26.0533	36.9608	26.3776	27.8303	26.5208	30.3258	19.0847	19.3593	15.2537	34.092
392.6	26.1118	36.8565	26.3421	27.8241	26.4961	30.2703	19.0441	19.3706	15.2444	34.1206
393.05	26.1188	36.7724	26.2817	27.7997	26.514	30.2259	18.9759	19.3752	15.2248	34.1637
393.5	26.1487	36.7389	26.2609	27.7853	26.575	30.1897	18.9063	19.3298	15.1839	34.2708
393.95	26.1569	36.7351	26.2446	27.7842	26.6092	30.1562	18.8119	19.2864	15.0503	34.2239
394.4	26.1457	36.8154	26.197	27.7832	26.589	30.0987	18.803	19.1977	14.9363	34.1665
394.85	26.1428	36.845	26.1871	27.776	26.5167	30.0493	18.8144	19.1234	14.8794	34.0958
395.3	26.0422	36.8078	26.1276	27.7546	26.4189	29.9881	18.8355	19.1021	14.8509	33.9973
395.75	25.9521	36.7609	26.0677	27.666	26.3249	29.9366	18.8962	19.0845	14.9875	33.9609
396.2	25.8762	36.6739	26.0396	27.6114	26.2519	29.8973	18.8804	19.0997	15.0893	33.9294
396.65	25.7934	36.6012	26.0109	27.5984	26.2163	29.8648	18.8488	19.0855	15.1448	33.8816
397.1	25.7578	36.6117	26.0396	27.5909	26.2178	29.8742	18.8238	19.0516	15.2003	33.8433
397.55	25.7174	36.6098	26.0956	27.595	26.2456	29.8672	18.7573	19.0331	15.1871	33.8051
398	25.6802	36.5993	26.135	27.5561	26.2783	29.848	18.7209	19.0108	15.2026	33.7343
398.45	25.6499	36.5935	26.1184	27.4593	26.3123	29.8121	18.7174	19.034	15.2325	33.7267
398.9	25.6552	36.5218	26.0612	27.3438	26.2815	29.7883	18.7094	19.0805	15.2038	33.7267
399.35	25.6432	36.4291	25.9733	27.2506	26.2134	29.7796	18.7279	19.085	15.1401	33.7123
399.8	25.6128	36.3401	25.8957	27.1793	26.164	29.7744	18.7383	19.0892	15.0621	33.7209
400.25	25.5705	36.2818	25.8502	27.1523	26.0926	29.7666	18.7158	19.0547	14.9863	33.6569
400.7	25.4976	36.2426	25.84	27.1481	26.096	29.72	18.6877	19.0061	14.977	33.6817
401.15	25.443	36.255	25.8454	27.1409	26.1247	29.6851	18.6619	19.0634	14.9951	33.7257
401.6	25.3932	36.2904	25.8571	27.1355	26.1401	29.6568	18.6651	19.104	15.013	33.7726
402.05	25.3346	36.2894	25.8739	27.1269	26.182	29.6241	18.7389	19.1714	14.9946	33.8481
402.5	25.2639	36.3019	25.8743	27.1476	26.179	29.6387	18.797	19.2083	14.9715	33.7219
402.95	25.2262	36.2684	25.8827	27.1472	26.2308	29.618	18.8407	19.0974	14.9643	33.5545
403.4	25.198	36.1977	25.8509	27.1606	26.2455	29.5994	18.8467	18.994	14.9867	33.3948
403.85	25.2372	36.1326	25.8616	27.1757	26.2369	29.5846	18.7241	18.895	15.0363	33.2457
404.3	25.3092	36.059	25.8508	27.1206	26.2489	29.5055	18.6181	18.8174	15.0623	33.1787
404.75	25.3436	35.993	25.8168	27.107	26.1283	29.4426	18.5092	18.8064	15.0475	33.1778
405.2	25.3968	35.9395	25.8159	27.0589	26.0565	29.3828	18.4155	18.8322	14.9648	33.1548
405.65	25.3995	35.9098	25.7398	27.0091	25.9886	29.3831	18.3976	18.8445	14.8904	33.129
406.1	25.3578	35.8983	25.6712	27.0084	25.9093	29.4224	18.3914	18.856	14.8166	33.1194
406.55	25.3733	35.9022	25.614	26.9983	25.9097	29.4728	18.4178	18.8708	14.7514	33.0678
407	25.3073	35.9395	25.5626	26.9858	25.8313	29.5026	18.4357	18.8307	14.721	33.0601
407.45	25.2382	35.9461	25.5467	26.9676	25.7449	29.4566	18.4656	18.7772	14.7005	33.0429
407.9	25.2135	35.9289	25.4681	26.9304	25.6577	29.3871	18.4643	18.7429	14.7025	33.0171
408.35	25.0772	35.9347	25.3844	26.8786	25.5412	29.3082	18.4114	18.6876	14.7316	33.0018
408.8	25.0229	35.9146	25.283	26.8788	25.5421	29.2613	18.3794	18.6609	14.7601	32.9387
409.25	24.9841	35.8276	25.1685	26.883	25.5794	29.2491	18.3098	18.6483	14.7583	32.8517
409.7	24.9228	35.7291	25.182	26.8822	25.6098	29.2636	18.2494	18.6195	14.7266	32.8029
410.15	24.9486	35.5789	25.1874	26.8571	25.6571	29.2637	18.2201	18.6241	14.676	32.7589
410.6	24.9374	35.3982	25.203	26.8064	25.6499	29.21	18.1837	18.5943	14.641	32.7245
411.05	24.9018	35.3781	25.2533	26.7755	25.5936	29.1543	18.1721	18.5558	14.645	32.7082
411.5	24.8499	35.3934	25.2599	26.7497	25.5576	29.0765	18.2134	18.4973	14.6751	32.6585
411.95	24.7473	35.4173	25.2852	26.7642	25.531	29.0219	18.243	18.413	14.6916	32.5983
412.4	24.6798	35.4728	25.3491	26.7539	25.4885	29.0599	18.2771	18.3782	14.6639	32.5399
412.85	24.6529	35.4575	25.3665	26.6906	25.4912	29.0736	18.3135	18.3497	14.618	32.5237
413.3	24.6877	35.4164	25.3763	26.6457	25.4603	29.0931	18.276	18.2687	14.5505	32.4997
413.75	24.7953	35.4173	25.3911	26.5894	25.4651	29.0938	18.2513	18.1903	14.5188	32.4892
414.2	24.8609	35.4059	25.3241	26.5691	25.4583	28.9961	18.2106	18.0895	14.5511	32.4816
414.65	24.8676	35.3829	25.3072	26.5672	25.3805	28.9999	18.1564	17.9846	14.5569	32.4462
415.1	24.8106	35.3628	25.2726	26.5326	25.3588	29.0121	18.1497	18.057	14.5732	32.4462
415.55	24.6608	35.2892	25.2019	26.4884	25.2809	29.0296	18.1313	18.1365	14.5788	32.4462
416	24.5333	35.2414	25.1723	26.4192	25.23	29.0906	18.0949	18.2178	14.5549	32.4739
416.45	24.4528	35.1745	25.0911	26.3939	25.2566	28.9995	18.0442	18.312	14.5655	32.4759
416.9	24.4138	35.1113	25.0172	26.3938	25.2493	28.8995	17.9614	18.2955	14.5484	32.4338
417.35	24.426	35.0893	24.984	26.4184	25.256	28.8194	17.8567	18.3014	14.4997	32.3659
417.8	24.438	35.0339	24.9436	26.4438	25.2954	28.7181	17.797	18.301	14.4409	32.2177
418.25	24.4014	35.0052	24.9219	26.3965	25.3252	28.6782	17.7683	18.2726	14.3801	32.0934
418.7	24.3389	34.9526	24.9154	26.3429	25.3396	28.6396	17.7526	18.2202	14.3686	32.0054
419.15	24.2948	34.8943	24.8827	26.2614	25.3354	28.5641	17.8195	18.1462	14.4002	31.9614
419.6	24.2512	34.8455	24.9171	26.1095	25.2967	28.5138	17.8766	18.0835	14.4371	31.9996
420.05	24.2748	34.8025	24.9589	26.0019	25.2383	28.4542	17.9448	18.0512	14.4343	32.036
420.5	24.3438	34.8206	24.9618	25.9108	25.2009	28.3848	18.0371	18.0475	14.4128	32.0666
420.95	24.3896	34.8149	24.9983	25.813	25.2085	28.3625	18.0489	18.0226	14.3489	32.0436
421.4	24.4197	34.8149	24.9236	25.8757	25.1809	28.3577	18.0301	17.9877	14.32	31.9863
421.85	24.4376	34.7996	24.8507	25.9422	25.1455	28.3827	17.9774	17.9376	14.3	31.9155
422.3	24.4405	34.7279	24.7914	25.9819	25.0961	28.423	17.8929	17.9185	14.2772	31.8352
422.75	24.4103	34.6714	24.7099	26.0606	24.9877	28.4022	17.8331	17.9261	14.2809	31.7912
423.2	24.3886	34.5988	24.6831	26.075	24.887	28.3546	17.7867	17.9459	14.2224	31.7826
423.65	24.3378	34.5318	24.6589	26.0731	24.8138	28.2863	17.7252	17.9871	14.1844	31.7883
424.1	24.2143	34.4735	24.6105	26.1575	24.7625	28.2088	17.6679	17.9726	14.1519	31.7845
424.55	24.1607	34.3893	24.5417	26.1909	24.7371	28.1985	17.6079	17.9547	14.122	31.7826
425	24.1115	34.3062	24.4513	26.1819	24.7782	28.194	17.6844	17.9169	14.1001	31.7529
425.45	24.0818	34.1675	24.3404	26.1718	24.7931	28.1918	17.7972	17.8709	14.0957	31.7386
425.9	24.1008	34.0575	24.3347	26.0092	24.7944	28.1773	17.9384	17.9115	14.0574	31.7166
426.35	24.0736	34.0049	24.3533	25.8838	24.8353	28.1021	18.0799	17.9546	14.0103	31.6621
426.8	24.0096	33.9829	24.4078	25.7757	24.8184	28.01	17.9785	18.0247	14.0376	31.5961
427.25	23.939	34.048	24.4956	25.6768	24.709	27.9369	17.8752	18.0596	14.0654	31.5072
427.7	23.9006	34.047	24.4994	25.6563	24.5948	27.8833	17.7591	17.9765	14.1362	31.444
428.15	23.8783	33.9954	24.54	25.6638	24.4339	27.8673	17.6621	17.8772	14.205	31.4345
428.6	23.9477	33.9495	24.5504	25.6698	24.2978	27.8627	17.6622	17.7756	14.2019	31.4412
429.05	24.0083	33.8768	24.5424	25.7022	24.3373	27.8517	17.6588	17.7046	14.1973	31.4708
429.5	24.0177	33.8797	24.5456	25.7265	24.3839	27.8923	17.6332	17.7068	14.193	31.51
429.95	24.0138	33.9151	24.4561	25.6922	24.4378	27.9296	17.6027	17.6932	14.1974	31.5062
430.4	23.9451	33.915	24.3984	25.6943	24.4835	27.9551	17.6228	17.6542	14.1906	31.4651
430.85	23.8727	33.8844	24.2939	25.6561	24.4613	27.9519	17.6088	17.6122	14.0341	31.38
431.3	23.8396	33.8376	24.194	25.6363	24.4299	27.8619	17.5973	17.5522	13.8307	31.271
431.75	23.8067	33.7573	24.1573	25.6473	24.425	27.7579	17.5534	17.558	13.6516	31.1744
432.2	23.7626	33.6999	24.0587	25.6226	24.4229	27.676	17.4474	17.57	13.5482	31.1333
432.65	23.7338	33.6655	24.0657	25.5789	24.4247	27.6114	17.3913	17.5864	13.6954	31.1189
433.1	23.674	33.6215	24.087	25.5122	24.4432	27.5686	17.345	17.5857	13.8733	31.1033
433.55	23.623	33.6043	24.0915	25.437	24.4357	27.5402	17.3393	17.5136	13.9936	31.0801
434	23.6154	33.5612	24.1722	25.3785	24.4177	27.4934	17.3581	17.4283	14.0541	31.0243
434.45	23.6035	33.5411	24.145	25.3758	24.38	27.4483	17.3609	17.3516	13.9832	30.9474
434.9	23.6237	33.5048	24.0919	25.3939	24.3328	27.4138	17.3635	17.296	13.9209	30.8746
435.35	23.7056	33.4761	24.0488	25.4013	24.2771	27.3626	17.3529	17.298	13.8994	30.817
435.8	23.762	33.4838	23.959	25.3867	24.2452	27.3184	17.3426	17.3519	13.8549	30.746
436.25	23.8211	33.4484	23.9389	25.3537	24.2111	27.2535	17.3418	17.3595	13.825	30.719
436.7	23.8351	33.4455	23.9306	25.32	24.1702	27.2246	17.3309	17.3808	13.7929	30.7333
437.15	23.723	33.4226	23.9013	25.277	24.1389	27.2191	17.3276	17.3694	13.7366	30.7496
437.6	23.6054	33.3814	23.8832	25.2223	24.0967	27.2388	17.3326	17.3112	13.7505	30.8029
438.05	23.4572	33.3585	23.8299	25.155	24.0934	27.3383	17.3162	17.309	13.778	30.8289
438.5	23.3113	33.2791	23.7791	25.0586	24.0876	27.3696	17.3218	17.2965	13.7825	30.7967
438.95	23.213	33.215	23.7726	24.9968	24.1333	27.3853	17.2759	17.292	13.7826	30.7943
439.4	23.1068	33.1519	23.761	24.979	24.1729	27.3674	17.2454	17.3054	13.7429	30.7877
439.85	23.0418	33.1213	23.7733	24.9749	24.1625	27.2598	17.2212	17.2842	13.6798	30.799
440.3	23.0351	33.1883	23.7774	24.9986	24.1528	27.2487	17.2401	17.2495	13.739	30.8329
440.75	23.0276	33.1701	23.7388	24.9893	24.0563	27.2506	17.3143	17.2242	13.8314	30.7512
441.2	23.055	33.0582	23.7162	25.0538	23.9639	27.2585	17.3583	17.1703	13.9407	30.6668
441.65	23.0799	32.8995	23.6949	25.1034	23.8951	27.2773	17.4038	17.1447	14.0451	30.5631
442.1	23.0537	32.6461	23.6769	25.1503	23.8809	27.1841	17.3401	17.1236	13.9477	30.4637
442.55	23.0867	32.539	23.666	25.2265	23.9097	27.0728	17.2584	17.0817	13.8275	30.4575
443	23.0947	32.6202	23.6316	25.1213	23.9271	26.9694	17.1813	17.0969	13.7158	30.4225
443.45	23.0834	32.7159	23.5864	25.0481	23.998	26.9072	17.0998	17.0792	13.6345	30.3849
443.9	23.0976	32.8364	23.5268	24.962	23.9824	26.8714	17.0761	17.083	13.643	30.3253
444.35	23.0824	32.8765	23.4909	24.8704	23.9557	26.8398	17.057	17.0873	13.6488	30.2548
444.8	23.0916	32.7943	23.486	24.8561	23.9306	26.8132	17.0767	17.0796	13.6393	30.2253
445.25	23.1111	32.7168	23.4635	24.7604	23.8108	26.7793	17.0893	17.1015	13.606	30.2494
445.7	23.147	32.6556	23.4801	24.6818	23.7389	26.7817	17.0982	17.097	13.5939	30.2854
446.15	23.1456	32.6116	23.4611	24.6153	23.6745	26.7845	17.1027	17.114	13.6065	30.3067
446.6	23.1029	32.6346	23.4262	24.539	23.6035	26.8251	17.0551	17.0737	13.6043	30.3038
447.05	23.0143	32.67	23.4251	24.5669	23.5628	26.8344	17.0384	17.0261	13.5991	30.2225
447.5	22.8774	32.7073	23.3998	24.5702	23.5426	26.8322	17.0309	16.9654	13.5627	30.2606
447.95	22.7535	32.7283	23.3993	24.5307	23.5356	26.8305	17.0858	16.8918	13.5166	30.305
448.4	22.6518	32.6862	23.4095	24.5388	23.553	26.7315	17.1462	16.8794	13.491	30.3435
448.85	22.6319	32.6136	23.3878	24.4923	23.5802	26.7521	17.1781	16.8483	13.4877	30.4184
449.3	22.6305	32.5189	23.3595	24.4631	23.5633	26.7814	17.1864	16.8365	13.5242	30.2798
449.75	22.6595	32.4558	23.3206	24.5106	23.5346	26.8133	17.0605	16.8088	13.5273	30.1558
450.2	22.6961	32.408	23.2368	24.5523	23.4913	26.909	16.9466	16.7534	13.5074	30.0412
450.65	22.6989	32.3582	23.1722	24.6191	23.4557	26.8027	16.8487	16.7128	13.4523	29.9051
451.1	22.7651	32.3362	23.1305	24.6867	23.4216	26.6828	16.7744	16.6951	13.3797	29.8624
451.55	22.7991	32.2779	23.1273	24.6628	23.3992	26.558	16.7904	16.7193	13.3551	29.7906
452	22.8213	32.2196	23.1706	24.6066	23.3903	26.3983	16.7968	16.7488	13.3467	29.7168
452.45	22.8258	32.1861	23.2005	24.5121	23.3892	26.3468	16.8075	16.7673	13.3664	29.6652
452.9	22.7123	32.1287	23.2493	24.408	23.4296	26.2902	16.8052	16.7853	13.3558	29.6264
453.35	22.6041	32.0809	23.2397	24.3623	23.4435	26.2288	16.775	16.796	13.333	29.6077
453.8	22.4973	32.0446	23.2166	24.3121	23.4387	26.1975	16.7716	16.7937	13.3364	29.6022
454.25	22.4054	32.0083	23.2055	24.2874	23.3978	26.1441	16.7531	16.8074	13.3482	29.5884
454.7	22.3802	31.9853	23.1094	24.2694	23.319	26.0905	16.7395	16.7479	13.4149	29.5592
455.15	22.3621	31.9384	23.0308	24.1916	23.2261	26.0874	16.7329	16.6435	13.4338	29.544
455.6	22.3179	31.8696	22.9637	24.1362	23.1401	26.081	16.7026	16.5473	13.4044	29.5062
456.05	22.2806	31.7491	22.8537	24.0652	23.074	26.1056	16.6695	16.4351	13.3568	29.4391
456.5	22.2556	31.5904	22.7967	24.0049	23.0246	26.1414	16.6458	16.5067	13.2671	29.3929
456.95	22.2196	31.577	22.7533	24.0244	23.0402	26.1034	16.6408	16.6039	13.2511	29.3302
457.4	22.2367	31.5703	22.6967	24.0361	23.069	26.1745	16.6028	16.731	13.2589	29.2849
457.85	22.2301	31.6573	22.7163	24.0651	23.0874	26.2283	16.58	16.8617	13.2726	29.3106
458.3	22.1946	31.8055	22.7329	24.0868	23.0939	26.2737	16.5412	16.7781	13.286	29.3254
458.75	22.1885	31.7194	22.7422	24.0452	23.0553	26.3516	16.4641	16.7085	13.2942	29.3144
459.2	22.1682	31.6611	22.7545	24.0131	22.9965	26.2193	16.4597	16.5872	13.302	29.274
459.65	22.1848	31.5291	22.7462	23.9758	22.9404	26.0843	16.4254	16.4763	13.3203	29.1965
460.1	22.2062	31.3675	22.7816	23.9342	22.8984	25.973	16.3953	16.4398	13.3551	29.1292
460.55	22.2295	31.3484	22.8252	23.9212	22.8739	25.8581	16.4014	16.3985	13.3353	29.1003
461	22.2212	31.2977	22.8455	23.8868	22.8614	25.8437	16.3935	16.3937	13.307	29.1059
461.45	22.1776	31.2729	22.8366	23.8165	22.8818	25.8385	16.4233	16.3995	13.2621	29.1141
461.9	22.1468	31.2509	22.7221	23.7469	22.8799	25.7817	16.4799	16.3924	13.2091	29.0959
462.35	22.0859	31.2126	22.5873	23.6753	22.858	25.7453	16.5225	16.3804	13.1874	29.0474
462.8	22.0734	31.2069	22.483	23.6299	22.8164	25.7009	16.5317	16.3607	13.1918	29.0025
463.25	22.0735	31.1964	22.3849	23.66	22.7216	25.6475	16.5155	16.323	13.2125	28.9726
463.7	22.0337	31.1868	22.3806	23.6978	22.6825	25.6568	16.4518	16.3302	13.238	28.9342
464.15	21.9692	31.1457	22.4084	23.7192	22.6716	25.6415	16.3946	16.3807	13.2712	28.9202
464.6	21.8928	31.0749	22.5443	23.7239	22.6852	25.6246	16.3581	16.4406	13.2611	28.8528
465.05	21.8063	31.008	22.6789	23.6853	22.7492	25.5971	16.3912	16.4756	13.2273	28.7713
465.5	21.7839	30.9449	22.7959	23.661	22.73	25.5189	16.4465	16.4946	13.195	28.7231
465.95	21.8136	30.8971	22.8827	23.6579	22.6646	25.5277	16.5015	16.4124	13.113	28.691
466.4	21.8029	30.8827	22.7308	23.6739	22.6039	25.5565	16.5376	16.2954	13.06	28.7347
466.85	21.8109	30.876	22.6118	23.7068	22.5219	25.5882	16.445	16.2227	13.0117	28.7616
467.3	21.7736	30.8693	22.4684	23.6745	22.4937	25.6579	16.3677	16.1256	12.9725	28.7832
467.75	21.7001	30.876	22.3064	23.653	22.4177	25.5723	16.2757	16.0768	12.9984	28.7759
468.2	21.6719	30.8263	22.2736	23.6101	22.3113	25.461	16.2065	16.0467	13.0025	28.7293
468.65	21.6405	30.7766	22.2005	23.5536	22.2	25.3826	16.2244	16.0216	13.0266	28.6856
469.1	21.6158	30.745	22.1446	23.5524	22.0531	25.2865	16.225	16.0218	13.0118	28.6493
469.55	21.6243	30.7268	22.152	23.5278	22.0691	25.2685	16.2178	16.0351	12.9458	28.6033
470	21.6011	30.7689	22.1439	23.5167	22.1241	25.2493	16.2037	16.0568	12.9326	28.5516
470.45	21.5268	30.8091	22.1501	23.5014	22.1605	25.1962	16.1651	16.0259	12.8956	28.508
470.9	21.4573	30.7785	22.1488	23.4845	22.2409	25.1432	16.1156	15.998	12.9097	28.4296
471.35	21.3896	30.7278	22.1075	23.4769	22.2527	25.0911	16.088	15.9643	12.9487	28.3812
471.8	21.331	30.6647	22.0563	23.415	22.2201	25.0436	16.0545	15.9211	12.9334	28.3486
472.25	21.3627	30.6044	22.0273	23.3626	22.2301	25.022	16.0326	15.9034	12.9282	28.3188
472.7	21.4244	30.6379	22.0062	23.2893	22.234	25.0009	16.024	15.8687	12.938	28.3138
473.15	21.4507	30.6293	21.9771	23.2125	22.2159	24.9839	15.9947	15.8082	12.9579	28.2786
473.6	21.4761	30.6082	21.9838	23.2279	22.2262	24.9931	15.9683	15.7588	12.9888	28.2417
474.05	21.4444	30.5413	21.9852	23.2324	22.2064	24.9616	15.9302	15.7161	13.0166	28.2102
474.5	21.3486	30.4103	21.9881	23.2522	22.1617	24.8981	15.8912	15.6636	12.9651	28.1902
474.95	21.2737	30.3625	22.028	23.255	22.1185	24.8274	15.8614	15.6687	12.8874	28.237
475.4	21.1952	30.2946	22.0572	23.1773	22.0731	24.7491	15.8465	15.6692	12.817	28.3012
475.85	21.1096	30.2956	22.0287	23.092	22.0264	24.7142	15.8318	15.6713	12.7862	28.3639
476.3	21.0803	30.3262	21.9746	23.0103	21.9929	24.6361	15.8271	15.7335	12.787	28.4122
476.75	21.0895	30.3061	21.8954	22.9677	21.9647	24.5372	15.8508	15.7779	12.7927	28.3606
477.2	21.1265	30.3214	21.8167	22.9857	21.9488	24.4288	15.858	15.8243	12.7268	28.2613
477.65	21.2075	30.2812	21.7854	23.0127	21.9515	24.2872	15.879	15.8531	12.5802	28.1591
478.1	21.2506	30.243	21.7741	23.0256	21.9637	24.3118	15.8936	15.8223	12.4709	28.0637
478.55	21.2024	30.2238	21.7774	23.0081	21.99	24.3636	15.9223	15.7452	12.3872	28.0225
479	21.1141	30.1636	21.7823	22.9504	21.985	24.4314	15.9651	15.6739	12.4564	28.0108
479.45	20.9916	30.1502	21.7869	22.9271	22.0007	24.531	16.0029	15.628	12.5926	27.9964
479.9	20.9121	30.1101	21.7781	22.9091	21.987	24.5313	16.0254	15.5887	12.6653	27.9683
480.35	20.8896	30.0584	21.7293	22.9222	21.9092	24.5263	15.9896	15.6184	12.7138	27.9447
480.8	20.8998	30.0536	21.6773	22.9825	21.8411	24.5143	15.9136	15.6307	12.6894	27.9163
481.25	21.0024	30.0077	21.6267	23.0003	21.747	24.5017	15.8245	15.6347	12.6511	27.8828
481.7	21.0725	29.9877	21.603	23.0036	21.6836	24.5021	15.7798	15.6538	12.6714	27.8443
482.15	21.1501	29.9599	21.6256	22.9763	21.6999	24.5086	15.7824	15.6315	12.7105	27.7834
482.6	21.2035	29.914	21.63	22.895	21.7323	24.4875	15.8305	15.6206	12.7342	27.7368
483.05	21.0939	29.8853	21.6323	22.8332	21.752	24.4155	15.8957	15.6137	12.7531	27.7109
483.5	20.9808	29.8289	21.5744	22.8111	21.7565	24.3397	15.9205	15.5899	12.748	27.7392
483.95	20.8473	29.8002	21.5142	22.7978	21.7302	24.2567	15.8913	15.5868	12.7411	27.772
484.4	20.7311	29.761	21.4486	22.8033	21.6889	24.2028	15.8352	15.5771	12.7551	27.7777
484.85	20.7025	29.7352	21.3676	22.77	21.6525	24.2164	15.7714	15.5482	12.7569	27.7595
485.3	20.588	29.7314	21.371	22.7044	21.6239	24.2317	15.6958	15.5226	12.7575	27.6916
485.75	20.4722	29.695	21.332	22.549	21.5923	24.2445	15.673	15.4554	12.72	27.724
486.2	20.349	29.6855	21.3301	22.4093	21.5794	24.2363	15.6536	15.392	12.6719	27.7863
486.65	20.2123	29.6443	21.3587	22.3374	21.5813	24.193	15.556	15.3387	12.6249	27.8304
487.1	20.2731	29.6109	21.3369	22.2861	21.5756	24.1625	15.4988	15.3104	12.5618	27.8595
487.55	20.3646	29.587	21.3488	22.3901	21.5596	24.1352	15.3866	15.2851	12.5401	27.7101
488	20.4708	29.4997	21.3436	22.4756	21.5746	24.1033	15.2795	15.2556	12.4878	27.5368
488.45	20.5836	29.4026	21.3152	22.5048	21.5815	24.0646	15.334	15.2474	12.4633	27.4199
488.9	20.5735	29.246	21.3115	22.5355	21.5898	24.0252	15.3742	15.2072	12.4669	27.3302
489.35	20.5347	29.123	21.2901	22.5234	21.63	23.9899	15.4684	15.2138	12.4451	27.3434
489.8	20.5553	29.0511	21.2658	22.5063	21.5749	23.9933	15.5709	15.2134	12.4626	27.3552
490.25	20.589	29.0214	21.2538	22.5065	21.502	24.0111	15.5589	15.194	12.4407	27.3146
490.7	20.6887	29.0601	21.2266	22.4815	21.4289	24.0157	15.5464	15.2017	12.3923	27.2659
491.15	20.7878	29.0413	21.1987	22.4452	21.3332	24.017	15.5119	15.1833	12.3579	27.2008
491.6	20.7335	29.0394	21.181	22.4341	21.2988	23.9729	15.4361	15.1895	12.3318	27.1593
492.05	20.6708	29.0455	21.1619	22.4433	21.3164	23.9337	15.428	15.1876	12.3518	27.165
492.5	20.5397	29.0464	21.1569	22.4628	21.3007	23.8775	15.3992	15.1877	12.4111	27.1858
492.95	20.4216	29.0872	21.1935	22.4597	21.295	23.8287	15.3713	15.1796	12.4814	27.199
493.4	20.3916	29.0928	21.2024	22.4149	21.2762	23.8508	15.409	15.1587	12.5044	27.2021
493.85	20.3419	29.1147	21.1937	22.3599	21.1991	23.8652	15.3887	15.1434	12.4794	27.1975
494.3	20.3133	29.1075	21.1619	22.2935	21.1869	23.8895	15.3868	15.1096	12.4455	27.2301
494.75	20.2824	29.0794	21.1015	22.2521	21.1493	23.8852	15.3669	15.0912	12.4062	27.2441
495.2	20.2517	29.0682	21.0945	22.2552	21.1296	23.8056	15.3325	15.0763	12.41	27.2539
495.65	20.2488	29.0254	21.0608	22.2276	21.1226	23.7835	15.3379	15.0738	12.4164	27.2274
496.1	20.2773	29.0196	21.0329	22.2237	21.0853	23.7566	15.3491	15.0543	12.4002	27.1376
496.55	20.3004	29.0289	20.9906	22.2001	21.1273	23.7694	15.4033	15.0306	12.3656	27.0894
497	20.3169	29.0416	20.9022	22.1471	21.1274	23.8165	15.46	14.9947	12.3119	27.0313
497.45	20.3078	29	20.8913	22.1722	21.1482	23.765	15.5062	14.9525	12.3125	27.0017
497.9	20.2712	28.9406	20.9088	22.1948	21.1756	23.732	15.5565	14.9221	12.3098	26.948
498.35	20.2501	28.8866	20.9613	22.2126	21.0802	23.6766	15.5622	14.8977	12.3266	26.8889
498.8	20.2243	28.8101	21.001	22.256	21.0357	23.6166	15.5171	14.882	12.3424	26.8521
499.25	20.2275	28.8094	21.0021	22.205	20.9883	23.5844	15.5022	14.8468	12.3038	26.8184
499.7	20.218	28.7876	20.9735	22.1305	20.947	23.554	15.4304	14.8447	12.2895	26.8184
500.15	20.1802	28.7644	20.921	22.0845	20.9809	23.5336	15.3926	14.8201	12.283	26.8217
500.6	20.1602	28.7715	20.8949	22.0332	20.9972	23.4786	15.3894	14.8061	12.2816	26.8382
501.05	20.1192	28.7357	20.8558	22.0202	20.963	23.4352	15.3141	14.8007	12.3114	26.8219
501.5	20.0683	28.7231	20.81	22.0152	20.9173	23.3854	15.3159	14.7825	12.3131	26.8321
501.95	20.0307	28.7064	20.7631	22.0294	20.8821	23.3151	15.2947	14.7789	12.3121	26.8175
502.4	19.8751	28.6728	20.7172	22.0343	20.816	23.278	15.2795	14.7607	12.3218	26.7646
502.85	19.7352	28.6776	20.6983	22.055	20.8162	23.2494	15.3047	14.7654	12.3132	26.7412
503.3	19.6591	28.6874	20.7183	22.1209	20.7964	23.2232	15.306	14.7494	12.3595	26.7033
503.75	19.5931	28.6838	20.6563	22.1194	20.7324	23.2042	15.3488	14.7627	12.3661	26.671
504.2	19.724	28.6988	20.6012	22.1059	20.7205	23.1684	15.3803	14.7481	12.3518	26.6548
504.65	19.851	28.7033	20.5216	22.0914	20.6983	23.1329	15.3798	14.7251	12.3345	26.6367
505.1	19.9162	28.7277	20.4024	22.0164	20.6463	23.1058	15.3685	14.7105	12.2754	26.6211
505.55	19.9699	28.7375	20.4384	21.9663	20.6139	23.1049	15.2985	14.666	12.2491	26.6151
506	19.9564	28.6865	20.4519	21.9544	20.5419	23.1191	15.2291	14.6869	12.2406	26.5939
506.45	19.9264	28.5963	20.4783	21.906	20.4674	23.0928	15.2302	14.6998	12.2578	26.557
506.9	20.0179	28.4336	20.5104	21.8927	20.5099	23.0419	15.2266	14.7204	12.2423	26.5062
507.35	20.1258	28.3213	20.4699	21.8885	20.5764	22.9727	15.2282	14.7145	12.2163	26.46
507.8	20.2008	28.2902	20.4522	21.8559	20.6687	22.9205	15.2474	14.6775	12.1858	26.4348
508.25	20.2696	28.2878	20.5085	21.8353	20.7474	22.9101	15.2071	14.6376	12.1536	26.4252
508.7	20.1173	28.3403	20.5931	21.8089	20.747	22.9098	15.1559	14.624	12.1787	26.4351
509.15	19.95	28.3783	20.7103	21.7972	20.709	22.9066	15.1255	14.6463	12.2093	26.4413
509.6	19.7717	28.3608	20.8118	21.7741	20.6358	22.8951	15.0723	14.6518	12.217	26.4302
510.05	19.6197	28.3506	20.7757	21.7709	20.5811	22.8942	15.027	14.6658	12.1874	26.4133
510.5	19.6131	28.3038	20.7171	21.7457	20.5479	22.9073	15.0292	14.6184	12.1336	26.3594
510.95	19.55	28.2543	20.6255	21.6862	20.5432	22.9188	15.0584	14.5946	12.0778	26.2973
511.4	19.5188	28.254	20.5324	21.6607	20.5878	22.9249	15.1013	14.5929	12.0557	26.3448
511.85	19.5067	28.2455	20.5059	21.6496	20.6138	22.902	15.1645	14.6738	12.0587	26.4009
512.3	19.4706	28.2849	20.4886	21.6544	20.6134	22.8438	15.2039	14.7915	12.0692	26.4993
512.75	19.5303	28.3036	20.4824	21.6781	20.5825	22.7856	15.223	14.8606	12.081	26.5916
513.2	19.5884	28.2743	20.5336	21.6755	20.5201	22.7355	15.2485	14.9212	12.0831	26.5048
513.65	19.599	28.2506	20.5634	21.6364	20.478	22.7037	15.269	14.8206	12.1047	26.4207
514.1	19.6106	28.1608	20.5649	21.584	20.4856	22.7115	15.2521	14.7159	12.1168	26.3201
514.55	19.5941	28.0861	20.5368	21.5261	20.5334	22.6784	15.2081	14.6249	12.1319	26.2322
515	19.5561	28.0165	20.4081	21.4669	20.5788	22.6486	15.1286	14.5559	12.1376	26.2238
515.45	19.6002	27.9211	20.3182	21.4226	20.5929	22.6142	15.0395	14.5416	12.1841	26.1897
515.9	19.6477	27.897	20.2739	21.4236	20.5604	22.5568	14.9887	14.5134	12.2509	26.1475
516.35	19.6993	27.8738	20.2481	21.4356	20.4879	22.5968	15.0425	14.5188	12.3242	26.1253
516.8	19.7658	27.8714	20.2869	21.4691	20.4516	22.6231	15.1245	14.4821	12.4154	26.0832
517.25	19.6936	27.9148	20.2914	21.5071	20.406	22.6357	15.2073	14.4932	12.3568	26.0671
517.7	19.6114	27.9282	20.2577	21.5232	20.3644	22.6555	15.3233	14.511	12.2763	26.0986
518.15	19.5006	27.9349	20.2232	21.5296	20.3258	22.6448	15.2725	14.4877	12.1829	26.0982
518.6	19.3747	27.9512	20.1799	21.5445	20.234	22.6168	15.2417	14.4753	12.083	26.1258
519.05	19.3171	27.9126	20.1395	21.5397	20.2111	22.6029	15.2118	14.4252	12.0908	26.1523
519.5	19.2653	27.8675	20.1274	21.5159	20.2008	22.5823	15.1226	14.4492	12.1295	26.1171
519.95	19.215	27.8187	20.1114	21.4924	20.2246	22.5333	15.1333	14.4839	12.1432	26.0916
520.4	19.2007	27.7416	20.0836	21.4356	20.274	22.5166	15.0866	14.5347	12.1372	26.0573
520.85	19.2116	27.6822	20.0697	21.3883	20.2596	22.4988	15.0781	14.591	12.0977	26.0068
521.3	19.2263	27.6077	20.0404	21.3571	20.2172	22.4791	15.072	14.5315	12.0229	25.9679
521.75	19.2772	27.559	20.0554	21.3347	20.1688	22.4615	15.0295	14.4542	12.0273	25.933
522.2	19.2908	27.6022	20.0822	21.2825	20.1287	22.4051	15.0292	14.3804	12.0429	25.9077
522.65	19.313	27.674	20.1039	21.2649	20.1251	22.3622	14.9656	14.3003	12.0779	25.8838
523.1	19.3282	27.7962	20.1334	21.2385	20.1667	22.3796	14.9509	14.2762	12.1137	25.8665
523.55	19.3138	27.8999	20.1122	21.1977	20.2052	22.4009	14.9589	14.297	12.0556	25.8488
524	19.3181	27.8117	20.119	21.226	20.2058	22.45	14.9635	14.3216	12.0117	25.8256
524.45	19.2907	27.7088	20.112	21.1972	20.1736	22.4719	14.9901	14.3701	11.9709	25.8006
524.9	19.276	27.593	20.0998	21.1659	20.145	22.4063	14.9977	14.3831	11.9665	25.7851
525.35	19.2701	27.4613	20.1106	21.1479	20.1219	22.3906	15.0124	14.3757	12.028	25.7745
525.8	19.2448	27.4712	20.0618	21.1188	20.1702	22.3798	15.0018	14.3256	12.0585	25.749
526.25	19.212	27.4913	20.0269	21.149	20.2199	22.3915	14.9997	14.2725	12.0689	25.7604
526.7	19.1866	27.4817	20.0009	21.1839	20.2312	22.4465	14.975	14.2681	12.0548	25.7727
527.15	19.1425	27.4767	19.9672	21.2356	20.193	22.4177	14.9425	14.2511	12.0297	25.7826
527.6	19.12	27.4359	19.9587	21.2672	20.0939	22.3813	14.9471	14.2585	12.0344	25.8004
528.05	19.1189	27.3877	19.9525	21.2437	20.0082	22.345	14.9529	14.2562	12.0519	25.7629
528.5	19.0843	27.3482	20.0198	21.2246	19.9494	22.2846	14.8942	14.224	12.041	25.7473
528.95	19.084	27.3499	20.0806	21.1552	19.935	22.2566	14.8421	14.1894	11.9849	25.7192
529.4	19.0852	27.3431	20.1514	21.1004	19.9547	22.2276	14.7743	14.1983	11.9251	25.6952
529.85	19.0846	27.3242	20.2501	21.0831	19.9509	22.1487	14.7042	14.1733	11.8516	25.7073
530.3	19.0879	27.3027	20.201	21.0584	19.9437	22.089	14.7737	14.1736	11.8214	25.6605
530.75	19.063	27.2356	20.1631	21.149	19.9303	22.0565	14.8185	14.1919	11.8474	25.6136
531.2	18.9995	27.1929	20.1076	21.2353	19.9013	22.0247	14.8628	14.155	11.8651	25.5761
531.65	18.9369	27.1627	19.9755	21.3189	19.9544	22.0344	14.8793	14.1843	11.9046	25.5158
532.1	18.8994	27.1541	19.8679	21.3955	19.9937	22.0819	14.8556	14.1937	11.9496	25.4803
532.55	18.8731	27.1751	19.7558	21.3114	20.0183	22.0705	14.8423	14.2089	11.981	25.4612
533	18.8991	27.1624	19.6404	21.2112	20.0443	22.0682	14.8269	14.2328	12.0366	25.4219
533.45	18.9037	27.1374	19.601	21.0843	20.0048	22.0612	14.8365	14.2309	12.0865	25.4102
533.9	18.9011	27.0972	19.6021	20.9768	20.0075	21.9488	14.8152	14.2249	12.0793	25.39
534.35	18.9249	27.0606	19.604	20.9415	20.0476	21.8749	14.824	14.2189	12.0604	25.3598
534.8	18.9132	27.0547	19.627	20.9484	20.0792	21.7848	14.813	14.2233	11.9841	25.3943
535.25	18.9075	27.045	19.6188	20.9837	20.1196	21.7295	14.8113	14.202	11.9397	25.43
535.7	18.948	27.0375	19.662	21.0156	20.0857	21.7781	14.7984	14.195	11.9542	25.4868
536.15	18.9417	27.0069	19.6912	21.0554	19.9986	21.8501	14.7574	14.1579	11.9448	25.5411
536.6	18.9791	26.9723	19.7178	21.0402	19.9164	21.9123	14.7422	14.134	11.9817	25.4988
537.05	19.0393	26.9813	19.7482	21.0156	19.8384	21.926	14.7443	14.1365	11.9524	25.4936
537.5	18.9982	27.0148	19.6985	20.9747	19.7966	21.9014	14.7823	14.1498	11.8972	25.4863
537.95	19.0114	27.0463	19.6934	20.9455	19.7794	21.8326	14.8311	14.1787	11.8989	25.502
538.4	19.0047	27.0357	19.6759	20.935	19.7417	21.8019	14.8799	14.1824	11.9042	25.5675
538.85	18.9617	26.9754	19.6525	20.9169	19.7042	21.7909	14.8661	14.181	11.9465	25.5212
539.3	18.9788	26.8691	19.6419	20.9115	19.666	21.7776	14.843	14.1541	11.9777	25.4699
539.75	18.8714	26.7711	19.5865	20.8921	19.6501	21.7759	14.8009	14.1488	11.9406	25.3924
540.2	18.7506	26.7596	19.5245	20.8769	19.6683	21.7659	14.7593	14.1579	11.8848	25.3045
540.65	18.6506	26.7853	19.4705	20.8568	19.6792	21.7668	14.797	14.1594	11.8272	25.262
541.1	18.5303	26.8379	19.4627	20.8402	19.6959	21.7754	14.8527	14.1665	11.8069	25.2179
541.55	18.5714	26.874	19.4813	20.8041	19.6835	21.7775	14.924	14.1417	11.8545	25.1802
542	18.6115	26.8769	19.5443	20.7612	19.678	21.7407	14.988	14.1033	11.8976	25.153
542.45	18.6601	26.8446	19.6222	20.7218	19.7232	21.6608	15.0139	14.0766	11.9316	25.149
542.9	18.7377	26.8055	19.6663	20.6808	19.772	21.5731	14.962	14.0503	11.9275	25.1532
543.35	18.7396	26.7904	19.6776	20.6642	19.8466	21.5086	14.9037	14.0398	11.903	25.1697
543.8	18.7391	26.7471	19.6584	20.6772	19.8879	21.4857	14.8395	14.0627	11.9073	25.1661
544.25	18.8078	26.7404	19.5959	20.7189	19.8371	21.5386	14.765	14.0566	11.9196	25.1549
544.7	18.8474	26.7265	19.5307	20.7701	19.781	21.5915	14.7537	14.0604	11.941	25.1493
545.15	18.9102	26.7068	19.4673	20.8153	19.7152	21.6385	14.761	14.0498	11.9611	25.1319
545.6	18.9802	26.7202	19.3992	20.8557	19.6815	21.6637	14.8181	14.0099	11.9653	25.1559
546.05	18.8722	26.7101	19.3621	20.8886	19.6742	21.6219	14.8525	13.9953	11.9893	25.1525
546.5	18.778	26.7092	19.3458	20.9321	19.6592	21.6747	14.8824	13.9678	12.0275	25.1309
546.95	18.6615	26.7268	19.3788	20.9658	19.5938	21.7347	14.8883	13.9686	12.0477	25.0947
547.4	18.5194	26.6921	19.4223	20.9742	19.4893	21.8033	14.8028	13.9805	12.0458	25.0244
547.85	18.5182	26.6475	19.4702	20.9508	19.4327	21.8825	14.7488	14.0265	12.0024	25.0055
548.3	18.5206	26.6048	19.518	20.88	19.4059	21.7935	14.6799	14.0719	11.9761	24.984
548.75	18.523	26.5168	19.5424	20.8186	19.4381	21.6795	14.6014	14.1	11.9729	24.973
549.2	18.5657	26.4808	19.5486	20.7641	19.5074	21.5716	14.58	14.1065	12.0064	24.9681
549.65	18.5683	26.4719	19.5686	20.7335	19.5497	21.4821	14.5727	14.0571	12.0619	24.9475
550.1	18.559	26.4671	19.5647	20.732	19.5462	21.4451	14.5715	14.0054	12.0629	24.9295
550.55	18.5755	26.5099	19.5413	20.7251	19.5221	21.4206	14.5851	13.9501	12.0451	24.9109
551	18.6006	26.5337	19.5341	20.7789	19.5219	21.4236	14.596	13.9183	11.9878	24.8916
551.45	18.6747	26.546	19.4648	20.8171	19.5237	21.4144	14.5875	13.908	11.9447	24.862
551.9	18.7486	26.5449	19.372	20.8518	19.5396	21.4396	14.578	13.9301	11.9492	24.8846
552.35	18.8003	26.5139	19.2991	20.8791	19.5821	21.4696	14.5907	13.9584	11.9575	24.9296
552.8	18.8105	26.4947	19.2179	20.7743	19.555	21.4502	14.6106	13.9798	11.9874	24.9897
553.25	18.7205	26.4594	19.1955	20.6888	19.5185	21.4339	14.618	14.0117	11.9804	25.0625
553.7	18.6581	26.4077	19.2533	20.5939	19.5085	21.4077	14.6312	13.9967	11.9744	25.0599
554.15	18.5952	26.3844	19.3208	20.5212	19.4746	21.3956	14.63	13.9876	11.9862	25.0264
554.6	18.5622	26.4351	19.4024	20.5225	19.4649	21.3862	14.6001	13.9771	11.9961	24.9656
555.05	18.5741	26.5071	19.4802	20.5252	19.4409	21.4096	14.6168	13.95	12.0192	24.8789
555.5	18.5489	26.6218	19.4909	20.5412	19.4753	21.4594	14.6295	13.9426	11.9828	24.8233
555.95	18.459	26.683	19.4659	20.5574	19.5145	21.4822	14.6296	13.9227	11.9204	24.7889
556.4	18.3594	26.5821	19.4259	20.585	19.5724	21.5131	14.6529	13.9123	11.8695	24.7722
556.85	18.2858	26.48	19.3522	20.5953	19.6622	21.4985	14.6316	13.9106	11.8384	24.7832
557.3	18.2468	26.3768	19.2884	20.6164	19.5744	21.4397	14.6181	13.9274	11.8657	24.8056
557.75	18.3154	26.3069	19.2589	20.6506	19.4945	21.3776	14.624	13.9399	11.887	24.829
558.2	18.3828	26.2809	19.2648	20.7086	19.4145	21.3284	14.6425	13.9792	11.8787	24.8238
558.65	18.4387	26.2652	19.2729	20.7387	19.3246	21.284	14.6911	13.9943	11.8381	24.7782
559.1	18.4782	26.2146	19.3139	20.7537	19.3659	21.2539	14.7437	13.996	11.7623	24.7149
559.55	18.5056	26.2019	19.3207	20.7242	19.3996	21.263	14.769	14.0048	11.7012	24.6446
560	18.5509	26.2253	19.2669	20.6166	19.4262	21.2591	14.7631	13.9395	11.6907	24.607
560.45	18.5786	26.2054	19.3095	20.5647	19.4441	21.2662	14.7227	13.9172	11.705	24.6389
560.9	18.5792	26.2314	19.3219	20.5127	19.4145	21.2763	14.66	13.8746	11.7268	24.6867
561.35	18.5255	26.2177	19.3528	20.4888	19.366	21.2588	14.6363	13.8418	11.7756	24.7502
561.8	18.4308	26.2138	19.4217	20.5313	19.3098	21.2493	14.6201	13.8524	11.7875	24.8216
562.25	18.3734	26.2414	19.3631	20.5598	19.2841	21.2425	14.64	13.8682	11.8257	24.8257
562.7	18.3738	26.2173	19.3337	20.5605	19.2891	21.2237	14.6862	13.9214	11.9078	24.8554
563.15	18.4163	26.1868	19.3209	20.5555	19.3129	21.1929	14.7029	13.9596	11.9536	24.8603
563.6	18.5026	26.1583	19.2964	20.531	19.3432	21.1314	14.7262	13.9989	12.0032	24.8461
564.05	18.5459	26.1368	19.3175	20.4995	19.3281	21.0719	14.7277	13.98	12.0028	24.8622
564.5	18.5244	26.1427	19.3256	20.528	19.3032	21.0519	14.7353	13.9483	11.9437	24.7901
564.95	18.4926	26.1439	19.3046	20.5513	19.2925	21.074	14.7415	13.9259	11.9194	24.74
565.4	18.4478	26.1229	19.2944	20.5591	19.2649	21.1692	14.746	13.8858	11.9044	24.7007
565.85	18.4272	26.1051	19.2467	20.5686	19.2874	21.2284	14.7504	13.7848	11.8925	24.6577
566.3	18.454	26.0918	19.1787	20.5495	19.3152	21.2477	14.6967	13.6725	11.9085	24.6676
566.75	18.4779	26.1031	19.1403	20.452	19.3305	21.2324	14.6632	13.5453	11.8811	24.6483
567.2	18.459	26.109	19.0964	20.3589	19.3606	21.1254	14.668	13.4248	11.8376	24.6105
567.65	18.4263	26.106	19.133	20.2531	19.37	21.0772	14.6761	13.5072	11.8297	24.5769
568.1	18.3835	26.1077	19.1884	20.1257	19.3606	21.0614	14.723	13.588	11.839	24.5641
568.55	18.2387	26.1039	19.2165	20.1452	19.3585	21.0379	14.7517	13.7031	11.8742	24.572
569	18.1422	26.1391	19.2428	20.1811	19.3674	21.0936	14.6978	13.8328	11.8417	24.6046
569.45	18.0464	26.1735	19.2078	20.264	19.3622	21.1099	14.6304	13.8559	11.7776	24.6442
569.9	17.9488	26.203	19.1582	20.3673	19.3561	21.0988	14.5436	13.892	11.685	24.6827
570.35	18.0522	26.1676	19.1266	20.4383	19.3139	21.1181	14.4805	13.9104	11.5989	24.7172
570.8	18.1572	26.0164	19.118	20.5154	19.256	21.0877	14.4655	13.9218	11.6908	24.7265
571.25	18.2794	25.8288	19.1406	20.5306	19.198	21.0846	14.4906	13.9162	11.7972	24.6857
571.7	18.3997	25.6299	19.1833	20.5607	19.1975	21.0962	14.5522	13.9138	11.9027	24.6176
572.15	18.4084	25.5855	19.1894	20.5518	19.2501	21.045	14.6008	13.9034	11.9846	24.5348
572.6	18.3821	25.7412	19.1645	20.5386	19.2998	21.0134	14.6502	13.9065	11.9421	24.4875
573.05	18.3861	25.9661	19.1113	20.5629	19.3505	20.9612	14.6798	13.9195	11.8997	24.5204
573.5	18.4019	26.1627	19.063	20.6038	19.3196	20.9203	14.7171	13.9073	11.8705	24.5416
573.95	18.4208	26.2367	19.0825	20.6581	19.2508	20.896	14.6857	13.8937	11.8602	24.5933
574.4	18.4569	26.1635	19.1227	20.6729	19.1982	20.8948	14.6706	13.8534	11.8532	24.6104
574.85	18.4221	26.0518	19.2107	20.6801	19.1652	20.8977	14.6506	13.8007	11.8464	24.5773
575.3	18.3603	26.0176	19.2729	20.6104	19.1616	20.8754	14.5965	13.7581	11.8604	24.5729
575.75	18.3008	26.0141	19.2935	20.5144	19.1529	20.9445	14.6459	13.7394	11.8814	24.5468
576.2	18.2624	26.0626	19.2308	20.4441	19.1535	20.9518	14.6542	13.7332	11.9488	24.5162
576.65	18.2158	26.1159	19.1083	20.3589	19.1432	20.9624	14.6516	13.7616	12.0009	24.4884
577.1	18.1994	26.0883	19.009	20.3194	19.151	20.9849	14.6356	13.8138	12.0003	24.468
577.55	18.2144	26.0468	18.8929	20.317	19.1865	20.9697	14.601	13.8389	11.9604	24.4708
578	18.2101	25.9718	18.9057	20.3153	19.1794	21.0129	14.5788	13.8742	11.8798	24.5201
578.45	18.2826	25.8754	18.9726	20.3487	19.1527	21.0452	14.5848	13.8828	11.8356	24.566
578.9	18.3469	25.8569	19.0175	20.3883	19.1244	21.0566	14.5911	13.8746	11.8182	24.5535
579.35	18.3251	25.8697	19.1167	20.4012	19.102	21.0266	14.5721	13.8746	11.839	24.5218
579.8	18.3286	25.9134	19.1702	20.4358	19.1239	20.9698	14.5793	13.8782	11.8793	24.4134
580.25	18.3123	25.988	19.209	20.4332	19.1649	20.9423	14.5402	13.8719	11.8659	24.3224
580.7	18.2924	26.0001	19.2782	20.417	19.1972	20.9205	14.5758	13.8533	11.8551	24.3049
581.15	18.3815	26.0001	19.2937	20.4241	19.1904	20.9297	14.6118	13.846	11.8382	24.2992
581.6	18.4256	25.9854	19.2871	20.4163	19.1779	20.9422	14.6472	13.8047	11.8256	24.2793
582.05	18.4364	25.9579	19.2442	20.4171	19.1724	20.931	14.708	13.7847	11.86	24.2448
582.5	18.4367	25.9489	19.1546	20.4172	19.1515	20.8626	14.6941	13.7544	11.9055	24.178
582.95	18.3846	25.932	19.0868	20.4312	19.1659	20.7839	14.6781	13.7056	11.9304	24.1214
583.4	18.3549	25.9381	19.034	20.4414	19.1361	20.7139	14.6305	13.6784	11.9376	24.2154
583.85	18.3221	25.9451	18.9948	20.4496	19.1079	20.6192	14.6303	13.6643	11.9233	24.3128
584.3	18.2808	25.9359	18.9772	20.4863	19.0969	20.6766	14.6388	13.7293	11.9076	24.4072
584.75	18.3178	25.917	18.9663	20.4502	19.0777	20.7177	14.6785	13.8015	11.918	24.4688
585.2	18.3456	25.8632	18.9444	20.4076	19.0566	20.7571	14.7334	13.87	11.9243	24.4493
585.65	18.4135	25.8229	18.9482	20.3727	19.026	20.8445	14.7386	13.899	11.9245	24.4517
586.1	18.5052	25.821	18.987	20.3101	19.0137	20.8357	14.7524	13.8472	11.9031	24.452
586.55	18.4646	25.8083	19.0177	20.3107	18.9894	20.859	14.7296	13.7961	11.8944	24.4466
587	18.4478	25.8106	19.0777	20.3352	19.0458	20.8605	14.6978	13.7639	11.9034	24.4419
587.45	18.4107	25.8747	19.1516	20.3748	19.12	20.8342	14.6519	13.7656	11.9304	24.4264
587.9	18.3712	25.9091	19.1629	20.4005	19.1804	20.8425	14.6428	13.7876	11.9677	24.4294
588.35	18.3785	25.9901	19.1838	20.4021	19.2605	20.8298	14.6407	13.8303	11.8796	24.4589
588.8	18.3198	26.0758	19.173	20.3728	19.31	20.8269	14.6401	13.8337	11.7968	24.4711
589.25	18.2344	25.9922	19.096	20.3001	19.3251	20.816	14.6323	13.8191	11.7202	24.4788
589.7	18.1431	25.9221	19.053	20.2697	19.3948	20.7827	14.5736	13.7835	11.6722	24.457
590.15	18.0789	25.8164	18.9937	20.2464	19.4504	20.7458	14.5238	13.7043	11.807	24.4672
590.6	18.1184	25.7169	18.9771	20.2235	19.47	20.7256	14.4835	13.6445	11.9183	24.4722
591.05	18.2023	25.7183	19.0405	20.2396	19.5061	20.7614	14.5342	13.626	11.9792	24.4627
591.5	18.279	25.7104	19.1149	20.2334	19.4133	20.7817	14.585	13.6355	11.9932	24.4847
591.95	18.3381	25.7185	19.1911	20.2359	19.313	20.8025	14.6421	13.631	11.9271	24.4068
592.4	18.3458	25.7307	19.2063	20.2633	19.2265	20.8291	14.6877	13.6294	11.8969	24.4149
592.85	18.3356	25.7428	19.162	20.2902	19.1357	20.7933	14.6531	13.5695	11.9342	24.4373
593.3	18.3491	25.7636	19.1096	20.296	19.1141	20.8277	14.66	13.5367	12.0093	24.4504
593.75	18.3411	25.7837	19.0501	20.2957	19.1161	20.8798	14.6421	13.5751	12.0633	24.5399
594.2	18.3527	25.7749	19.0099	20.2813	19.1149	20.9061	14.6327	13.6259	12.0727	24.4934
594.65	18.3755	25.7486	18.9864	20.2321	19.1346	20.9675	14.5986	13.7009	12.0441	24.441
595.1	18.3846	25.721	18.9641	20.199	19.1551	20.9535	14.5556	13.7545	11.9732	24.3774
595.55	18.4405	25.7032	19.0476	20.1698	19.1655	20.9321	14.53	13.7946	11.9503	24.3037
596	18.4542	25.679	19.1715	20.151	19.2013	20.9154	14.5009	13.8282	11.9426	24.2891
596.45	18.4183	25.6886	19.2895	20.1815	19.1911	20.8688	14.529	13.8703	11.9491	24.2765
596.9	18.3746	25.7228	19.4063	20.2416	19.1681	20.8194	14.541	13.8622	11.9705	24.2723
597.35	18.3151	25.7413	19.3459	20.297	19.1386	20.7684	14.5634	13.8272	11.9445	24.2684
597.8	18.2951	25.8023	19.2391	20.3523	19.0873	20.7331	14.6068	13.7833	11.9576	24.2819
598.25	18.3531	25.8441	19.1381	20.371	19.1182	20.7308	14.6432	13.7213	11.9679	24.2958
598.7	18.4169	25.8345	19.0274	20.3861	19.155	20.74	14.6644	13.716	11.9915	24.3074
599.15	18.4404	25.8407	19.005	20.3929	19.1804	20.7542	14.6807	13.7049	12.026	24.3128
599.6	18.4233	25.8332	19.0013	20.3936	19.2253	20.7587	14.6709	13.6829	12.0194	24.3062
600.05	18.3532	25.8231	19.0207	20.4059	19.2004	20.7346	14.6482	13.6728	12.0092	24.2976
600.5	18.3113	25.8438	19.0426	20.3533	19.1917	20.7312	14.6743	13.6486	12.0143	24.2962
600.95	18.3255	25.8305	19.0586	20.3054	19.2018	20.7418	14.6595	13.6499	12.0489	24.2899
601.4	18.3924	25.812	19.0612	20.2486	19.1986	20.7363	14.6667	13.6895	12.0819	24.2885
601.85	18.4677	25.793	19.0374	20.2009	19.2001	20.7175	14.6571	13.7262	12.0847	24.2955
602.3	18.4975	25.769	19.0208	20.1949	19.1478	20.7118	14.5883	13.7794	11.9722	24.2805
602.75	18.4845	25.7918	19.0278	20.1917	19.0972	20.6733	14.557	13.8139	11.8356	24.2945
603.2	18.4421	25.8386	19.0443	20.2689	19.0278	20.6714	14.5168	13.8119	11.7202	24.2984
603.65	18.4056	25.911	19.0694	20.3416	18.963	20.6554	14.5179	13.8115	11.6562	24.289
604.1	18.3719	26.0123	19.1039	20.4502	18.9794	20.6019	14.5523	13.7829	11.7775	24.2976
604.55	18.3603	26.0467	19.108	20.5544	18.991	20.5464	14.5861	13.7663	11.8799	24.2718
605	18.3719	26.0133	19.1115	20.5214	19.0318	20.4705	14.6129	13.763	11.9612	24.2605
605.45	18.3836	25.9597	19.1185	20.4733	19.0976	20.521	14.6014	13.7663	12.0374	24.2845
605.9	18.4077	25.8559	19.1115	20.3796	19.1245	20.6046	14.5781	13.7759	12.0318	24.3143
606.35	18.4261	25.7997	19.0814	20.2848	19.1371	20.7252	14.5742	13.771	12.0464	24.3579
606.8	18.3852	25.7944	19.0619	20.2235	19.1466	20.8512	14.5613	13.764	12.0681	24.3768
607.25	18.3477	25.7644	19.1049	20.1484	19.1342	20.877	14.6101	13.7995	12.0113	24.3717
607.7	18.3099	25.7564	19.1331	20.0877	19.1233	20.8753	14.6682	13.8533	11.9251	24.3706
608.15	18.2796	25.7665	19.2342	20.0378	19.1311	20.8442	14.6244	13.9083	11.8655	24.3485
608.6	18.3205	25.7537	19.3292	20.0324	19.1219	20.7841	14.5979	13.9691	11.8253	24.3229
609.05	18.3412	25.7529	19.2681	20.0867	19.1008	20.7389	14.4986	13.9076	11.8991	24.2634
609.5	18.3761	25.7381	19.2253	20.1355	19.0802	20.7074	14.4002	13.8224	11.9971	24.1633
609.95	18.3925	25.6851	19.14	20.172	19.055	20.6676	14.4399	13.7507	12.0373	24.0961
610.4	18.3344	25.6589	19.0399	20.1876	19.0378	20.6406	14.4764	13.6584	12.0336	24.0552
610.85	18.3097	25.6364	19.0397	20.1757	19.0601	20.6249	14.5491	13.6649	11.9704	24.0499
611.3	18.297	25.6458	19.0487	20.1793	19.0828	20.6215	14.6064	13.6755	11.9346	24.0963
611.75	18.3051	25.6627	19.0376	20.2601	19.088	20.6405	14.6051	13.7123	11.9424	24.1137
612.2	18.3877	25.6606	19.0329	20.3619	19.0846	20.7089	14.6318	13.7751	11.9833	24.1227
612.65	18.4639	25.6665	19.011	20.4589	19.0533	20.7469	14.652	13.8028	12.0279	24.126
613.1	18.4899	25.6593	18.9597	20.551	19.0001	20.763	14.6688	13.8379	12.0138	24.1136
613.55	18.5029	25.6661	18.9185	20.5134	18.9839	20.7758	14.6982	13.807	11.9994	24.133
614	18.4506	25.6848	18.9163	20.4675	19.0201	20.7149	14.659	13.7663	11.9835	24.1596
614.45	18.3694	25.7068	18.9459	20.3992	19.0763	20.6348	14.6234	13.7133	11.9686	24.2022
614.9	18.303	25.7216	18.9995	20.2854	19.1759	20.545	14.624	13.6744	11.984	24.2358
615.35	18.2609	25.7145	19.0821	20.2192	19.2596	20.4627	14.596	13.6698	11.9792	24.2688
615.8	18.2671	25.703	19.1145	20.1396	19.2692	20.4341	14.6196	13.6705	11.9778	24.3055
616.25	18.2973	25.6779	19.0891	20.0839	19.2551	20.4886	14.6319	13.6944	11.9842	24.3231
616.7	18.404	25.6518	19.0683	20.0958	19.2198	20.5676	14.6203	13.6701	11.9866	24.3376
617.15	18.4932	25.6586	19.0246	20.134	19.1713	20.6271	14.6246	13.6307	12.0334	24.3295
617.6	18.5653	25.6759	19.0056	20.1957	19.1679	20.6681	14.6233	13.5743	12.0552	24.2995
618.05	18.6268	25.7002	19.0258	20.2693	19.193	20.6759	14.6218	13.5272	12.0703	24.2763
618.5	18.5702	25.7356	19.0405	20.3175	19.198	20.6779	14.6244	13.5292	12.072	24.2682
618.95	18.5114	25.7522	19.0159	20.344	19.2044	20.691	14.6444	13.5804	12.0216	24.2719
619.4	18.4243	25.753	18.9838	20.3548	19.1776	20.6975	14.6712	13.6538	12.0001	24.297
619.85	18.351	25.7563	18.9458	20.3312	19.1139	20.6874	14.7289	13.7209	11.967	24.3422
620.3	18.3273	25.7504	18.9077	20.297	19.0892	20.6957	14.7857	13.7795	11.9776	24.3947
620.75	18.3092	25.7148	18.9657	20.2544	19.0585	20.6996	14.8099	13.7789	11.9871	24.4421
621.2	18.325	25.6492	19.0225	20.2208	19.0703	20.7049	14.7759	13.7675	11.9918	24.4683
621.65	18.3422	25.5525	19.0796	20.2192	19.09	20.7037	14.6945	13.7368	12.0351	24.4415
622.1	18.3695	25.4914	19.1358	20.234	19.084	20.6759	14.6155	13.7064	12.0485	24.3519
622.55	18.4003	25.5014	19.1338	20.3	19.1136	20.6517	14.54	13.7279	12.0976	24.2471
623	18.4355	25.5671	19.1115	20.3421	19.0982	20.6303	14.5079	13.7466	12.1387	24.1772
623.45	18.4389	25.7163	19.0903	20.4441	19.1046	20.6319	14.5039	13.7834	12.138	24.1301
623.9	18.455	25.7654	19.0504	20.5237	19.0986	20.649	14.5042	13.7903	12.1317	24.1335
624.35	18.4587	25.7673	19.0054	20.5648	19.0618	20.6568	14.5074	13.758	12.0977	24.143
624.8	18.4417	25.7438	19.002	20.628	19.0683	20.688	14.5399	13.7208	12.0617	24.1163
625.25	18.4556	25.631	18.992	20.5314	19.0772	20.6956	14.5766	13.6778	12.0369	24.1132
625.7	18.4426	25.6081	18.9798	20.4536	19.0989	20.6901	14.5993	13.6674	12.0082	24.1334
626.15	18.4284	25.5843	19.0066	20.3584	19.127	20.7071	14.6543	13.6834	11.9539	24.1622
626.6	18.4215	25.5901	19.0324	20.2593	19.1174	20.6777	14.6781	13.7218	11.9037	24.2131
627.05	18.3969	25.6413	19.0479	20.2585	19.0607	20.6754	14.6813	13.7887	11.8687	24.254
627.5	18.3717	25.6481	19.1018	20.2082	19.0149	20.6669	14.6764	13.853	11.8772	24.2717
627.95	18.3606	25.6717	19.1065	20.1708	19.0041	20.6307	14.6585	13.8783	11.9308	24.3013
628.4	18.4446	25.6441	19.0687	20.1307	19.0165	20.6395	14.6266	13.9076	11.976	24.3098
628.85	18.5436	25.599	19.041	20.0583	19.0849	20.5501	14.6522	13.8799	11.9915	24.3155
629.3	18.6582	25.5869	18.9914	20.0696	19.1615	20.4562	14.7096	13.8431	11.9533	24.3002
629.75	18.7566	25.547	18.9871	20.0917	19.1756	20.3768	14.7537	13.818	11.9382	24.2528
630.2	18.6709	25.5451	18.9986	20.1165	19.1856	20.276	14.8351	13.8386	11.944	24.2156
630.65	18.579	25.5408	19.0087	20.1711	19.1697	20.3435	14.848	13.887	12.0163	24.1733
631.1	18.4746	25.5332	19.0203	20.1995	19.1551	20.4466	14.8453	13.9293	12.1131	24.1655
631.55	18.3535	25.5526	18.9946	20.2282	19.1781	20.5458	14.8382	13.992	12.1545	24.1877
632	18.3219	25.5503	18.9793	20.254	19.1882	20.6456	14.8488	13.9129	12.1862	24.2317
632.45	18.2922	25.5797	18.9838	20.2611	19.1938	20.6533	14.8789	13.8391	12.1281	24.285
632.9	18.2665	25.5903	18.9733	20.2519	19.1732	20.6214	14.9125	13.7539	12.0879	24.3179
633.35	18.3139	25.5835	18.9647	20.2528	19.1472	20.6079	14.9508	13.6634	12.0891	24.3489
633.8	18.3919	25.601	18.9657	20.2511	19.1296	20.6042	14.905	13.6545	12.0661	24.3475
634.25	18.4611	25.6	18.9524	20.2706	19.1245	20.6024	14.8407	13.653	12.0925	24.3278
634.7	18.5418	25.6079	18.9713	20.3	19.1184	20.6342	14.7527	13.6928	12.0958	24.2761
635.15	18.5625	25.6401	19.0221	20.2861	19.097	20.643	14.6926	13.7332	12.0747	24.2116
635.6	18.5672	25.6439	19.0695	20.2704	19.0675	20.6453	14.6768	13.7696	12.0853	24.1519
636.05	18.5712	25.623	19.1206	20.2467	19.0384	20.673	14.7096	13.7836	12.0878	24.107
636.5	18.5499	25.6193	19.1419	20.2017	18.959	20.6869	14.785	13.7713	12.0754	24.0211
636.95	18.5301	25.5884	19.1337	20.2	18.9039	20.7173	14.804	13.7435	12.057	23.9302
637.4	18.4515	25.6086	19.0932	20.2022	18.8776	20.7441	14.8179	13.7109	12.03	23.8356
637.85	18.4132	25.6778	19.0407	20.193	18.8411	20.7366	14.7857	13.6625	12.0115	23.7183
638.3	18.4045	25.7448	18.9971	20.1942	18.9315	20.7428	14.726	13.602	12.0185	23.7754
638.75	18.374	25.845	18.9664	20.1842	19.0048	20.7385	14.7055	13.5731	12.0497	23.8701
639.2	18.3943	25.88	18.9752	20.2035	19.0685	20.717	14.7206	13.5531	12.0784	23.9943
639.65	18.3642	25.8676	19.0064	20.24	19.1423	20.7494	14.7602	13.5999	12.0786	24.1551
640.1	18.2728	25.8209	19.0499	20.2901	19.1483	20.7776	14.8151	13.6666	12.0668	24.2109
640.55	18.242	25.7441	19.071	20.3482	19.1765	20.7919	14.8701	13.7151	12.0391	24.2378
641	18.2207	25.7054	19.0785	20.3541	19.2488	20.8308	14.862	13.7424	12.0029	24.2449
641.45	18.2036	25.6846	19.0421	20.3544	19.3245	20.7961	14.8513	13.7214	12.0089	24.2454
641.9	18.2666	25.668	18.9866	20.3375	19.4055	20.7348	14.7949	13.6909	12.0046	24.2638
642.35	18.3088	25.6475	18.9578	20.2936	19.4442	20.7004	14.7298	13.6504	11.9977	24.2845
642.8	18.3475	25.5936	18.9148	20.2893	19.365	20.6723	14.715	13.619	12.006	24.2914
643.25	18.4064	25.5254	18.9363	20.2638	19.2721	20.6555	14.6972	13.5964	11.9887	24.2767
643.7	18.4528	25.4732	18.9697	20.2214	19.1652	20.6671	14.7293	13.596	11.999	24.2385
644.15	18.3817	25.43	18.9916	20.2025	19.0805	20.6668	14.7618	13.6019	12.0301	24.1901
644.6	18.2981	25.4283	19.0293	20.1517	19.0558	20.6412	14.786	13.6239	12.041	24.1609
645.05	18.2081	25.4719	19.0191	20.1295	19.0222	20.6461	14.8185	13.6556	12.0551	24.1873
645.5	18.0719	25.5372	19.011	20.1561	19.0092	20.6142	14.8375	13.6383	12.0288	24.2219
645.95	18.1322	25.6049	19.0152	20.1593	19.0071	20.5801	14.8514	13.6466	11.989	24.2565
646.4	18.2038	25.6605	19.0015	20.182	19.0136	20.5694	14.8537	13.6492	11.9789	24.2751
646.85	18.2782	25.6898	19.001	20.1916	19.0606	20.5576	14.8259	13.6411	11.9641	24.2022
647.3	18.4152	25.6846	19.0037	20.1736	19.104	20.5843	14.8725	13.6671	12.0073	24.1813
647.75	18.4714	25.6673	18.9745	20.1826	19.165	20.5956	14.9179	13.6611	12.0208	24.1719
648.2	18.4963	25.6357	18.9804	20.173	19.2246	20.5723	14.9557	13.6548	11.9915	24.1771
648.65	18.5234	25.5692	18.999	20.1667	19.2503	20.5476	15.0264	13.6455	11.9927	24.2436
649.1	18.4886	25.5173	19.0057	20.1711	19.2763	20.5148	14.9297	13.6568	11.9606	24.2411
649.55	18.4831	25.4973	19.0608	20.1625	19.3204	20.5078	14.8435	13.6648	11.9821	24.2509
650	18.5043	25.4786	19.08	20.2005	19.3612	20.5756	14.7692	13.6793	12.0707	24.2713
650.45	18.5033	25.5063	19.0698	20.2268	19.4153	20.6414	14.7021	13.6942	12.1057	24.2698
650.9	18.5122	25.5277	19.0623	20.2389	19.4493	20.7021	14.7497	13.6995	12.1424	24.2775
651.35	18.4665	25.5274	19.0089	20.2692	19.3816	20.7619	14.7969	13.7203	12.1559	24.2688
651.8	18.4067	25.5437	19.0001	20.2477	19.3193	20.7411	14.8606	13.7119	12.1279	24.2644
652.25	18.386	25.5518	19.0028	20.2338	19.2411	20.7652	14.9102	13.7246	12.1634	24.2679
652.7	18.3979	25.5658	19.0024	20.2347	19.1817	20.7811	14.9326	13.7079	12.1955	24.2787
653.15	18.4314	25.6086	19.0522	20.2192	19.1719	20.8014	14.9367	13.6721	12.2008	24.2994
653.6	18.4928	25.6491	19.059	20.2263	19.0926	20.8562	14.9069	13.6647	12.1826	24.285
654.05	18.5078	25.673	19.0795	20.2375	19.0233	20.8192	14.8323	13.6328	12.1089	24.2573
654.5	18.5138	25.6769	19.107	20.2607	18.9519	20.7918	14.7465	13.5973	12.0536	24.2217
654.95	18.5092	25.622	19.0986	20.283	18.9009	20.7515	14.6768	13.6202	12.0113	24.1911
655.4	18.4765	25.5383	19.0958	20.2999	18.9681	20.7212	14.6109	13.6378	12.0075	24.1981
655.85	18.499	25.4745	19.0778	20.3195	19.0466	20.7371	14.6054	13.6469	12.025	24.21
656.3	18.5176	25.4606	19.0318	20.2777	19.1114	20.7677	14.6091	13.6886	12.008	24.2417
656.75	18.537	25.474	19.0067	20.2347	19.1742	20.7918	14.6147	13.6516	12.0376	24.2617
657.2	18.5805	25.5179	18.9851	20.1894	19.1867	20.7925	14.6461	13.6245	12.0673	24.257
657.65	18.5699	25.5459	18.9793	20.1418	19.1831	20.7862	14.6636	13.6221	12.1032	24.2543
658.1	18.5512	25.5184	19.0294	20.1542	19.2723	20.7572	14.7059	13.6345	12.15	24.2248
658.55	18.566	25.51	19.05	20.1857	19.349	20.7418	14.755	13.6991	12.1458	24.1897
659	18.5663	25.5041	19.0912	20.2441	19.4259	20.7179	14.8093	13.7381	12.1072	24.1734
659.45	18.5926	25.5078	19.1079	20.3251	19.5131	20.7009	14.8847	13.7667	12.0673	24.1946
659.9	18.6457	25.5517	19.0938	20.3982	19.4548	20.7144	14.9464	13.7573	12.0593	24.2464
660.35	18.6529	25.5867	19.0877	20.4415	19.3921	20.7005	14.9851	13.759	12.081	24.292
660.8	18.6634	25.6121	19.0387	20.4448	19.3248	20.6835	14.9804	13.8241	12.1148	24.3097
661.25	18.6784	25.6302	18.9955	20.3985	19.2519	20.6564	14.9306	13.9106	12.1238	24.2884
661.7	18.6321	25.6268	18.9377	20.3409	19.2428	20.5662	14.8612	13.9827	12.0813	24.2699
662.15	18.6244	25.6059	18.9234	20.3002	19.1536	20.5006	14.8028	14.0063	12.0337	24.2591
662.6	18.5938	25.5868	18.9316	20.2884	19.0689	20.4728	14.7778	13.9287	12.0153	24.2524
663.05	18.5445	25.5765	18.973	20.2972	18.9756	20.4572	14.7568	13.8257	12.0311	24.2495
663.5	18.5537	25.5663	19.0521	20.2738	18.8761	20.4941	14.7413	13.7552	12.0934	24.2158
663.95	18.5291	25.576	19.0617	20.2295	18.9569	20.5372	14.7477	13.6893	12.1342	24.1764
664.4	18.5072	25.587	19.1017	20.1776	19.0441	20.5793	14.735	13.6847	12.1323	24.1397
664.85	18.5217	25.5925	19.0996	20.1152	19.1501	20.6467	14.75	13.6801	12.1166	24.1186
665.3	18.5126	25.6208	19.0666	20.1064	19.2567	20.6952	14.7863	13.6921	12.0933	24.1224
665.75	18.5098	25.652	19.0865	20.1391	19.268	20.7289	14.7885	13.741	12.0883	24.1431
666.2	18.5584	25.6576	19.0717	20.1556	19.2659	20.7477	14.8192	13.7747	12.1112	24.205
666.65	18.5552	25.6699	19.0981	20.2209	19.2351	20.7064	14.8198	13.8179	12.1246	24.2534
667.1	18.5438	25.6526	19.1281	20.2651	19.2084	20.676	14.8256	13.8188	12.1233	24.3059
667.55	18.5678	25.6147	19.1411	20.261	19.1792	20.6557	14.8427	13.8135	12.1176	24.3673
668	18.5376	25.5998	19.1624	20.3019	19.157	20.6272	14.8421	13.8082	12.1237	24.3837
668.45	18.5512	25.5858	19.1694	20.2958	19.1753	20.6379	14.8549	13.8056	12.152	24.3848
668.9	18.6558	25.5877	19.1955	20.278	19.2049	20.6544	14.8596	13.7978	12.1698	24.3625
669.35	18.7089	25.5984	19.2096	20.3035	19.2439	20.6671	14.8591	13.761	12.1655	24.3243
669.8	18.7846	25.5969	19.2186	20.2698	19.2523	20.6913	14.8524	13.7265	12.1233	24.2846
670.25	18.8316	25.5937	19.1909	20.2539	19.2442	20.6942	14.8845	13.6713	12.0716	24.2299
670.7	18.7374	25.5862	19.1273	20.2533	19.256	20.6665	14.8778	13.6546	12.0625	24.1879
671.15	18.6808	25.5965	19.051	20.2271	19.2684	20.6407	14.9011	13.6526	12.1057	24.1411
671.6	18.6445	25.6451	18.9665	20.2416	19.3287	20.61	14.9255	13.6691	12.18	24.1075
672.05	18.6181	25.7101	18.9225	20.2494	19.3762	20.6032	14.9231	13.6956	12.2335	24.1382
672.5	18.6452	25.7499	18.9116	20.227	19.3624	20.6325	14.957	13.7246	12.238	24.1419
672.95	18.5881	25.6759	18.9597	20.2289	19.3535	20.6609	14.9645	13.7596	12.1972	24.1751
673.4	18.5111	25.5616	19.0105	20.2251	19.3139	20.6901	14.9846	13.7925	12.1582	24.2285
673.85	18.4511	25.397	19.0554	20.2116	19.2935	20.7054	14.9621	13.8447	12.1565	24.2534
674.3	18.3834	25.2826	19.097	20.2509	19.3039	20.6969	14.9289	13.8641	12.1773	24.3201
674.75	18.4738	25.3506	19.0796	20.2446	19.2827	20.6915	14.8816	13.8868	12.1896	24.349
675.2	18.5333	25.4423	19.0875	20.2266	19.2663	20.7036	14.8167	13.8709	12.164	24.3295
675.65	18.583	25.5537	19.0785	20.2325	19.2229	20.7273	14.7842	13.8453	12.098	24.3163
676.1	18.6705	25.6429	19.0545	20.2026	19.1978	20.7665	14.751	13.813	12.0279	24.2972
676.55	18.6592	25.6427	19.0618	20.2368	19.1984	20.8024	14.7521	13.7567	12.015	24.2761
677	18.6944	25.6247	19.0693	20.2649	19.2098	20.8088	14.7639	13.7167	12.0297	24.2876
677.45	18.708	25.6383	19.1018	20.276	19.2368	20.7987	14.787	13.6708	12.0815	24.2908
677.9	18.7084	25.6391	19.1279	20.3116	19.2398	20.7889	14.819	13.6603	12.1507	24.2773
678.35	18.7191	25.663	19.1656	20.2826	19.2215	20.7677	14.8325	13.6408	12.167	24.2862
678.8	18.7092	25.6934	19.1718	20.2747	19.1992	20.7688	14.8516	13.6406	12.1892	24.3126
679.25	18.7013	25.6884	19.141	20.2806	19.2163	20.7677	14.8654	13.6313	12.1846	24.3212
679.7	18.6849	25.7143	19.1376	20.2816	19.2469	20.7429	14.8677	13.6211	12.1584	24.3331
680.15	18.6766	25.6933	19.098	20.3212	19.3224	20.731	14.8655	13.6608	12.1442	24.3145
680.6	18.6545	25.6615	19.0799	20.3556	19.3967	20.6978	14.8587	13.693	12.1179	24.2645
681.05	18.6565	25.6509	19.1032	20.3564	19.4162	20.674	14.8512	13.7337	12.1047	24.3267
681.5	18.6553	25.6052	19.0957	20.328	19.4205	20.6725	14.8356	13.7672	12.1107	24.392
681.95	18.65	25.5943	19.0938	20.2939	19.411	20.6742	14.8196	13.7978	12.137	24.4815
682.4	18.6776	25.5966	19.0783	20.2567	19.424	20.6948	14.8118	13.8058	12.1715	24.5683
682.85	18.7094	25.5712	19.0509	20.2572	19.4276	20.7264	14.8034	13.8321	12.1951	24.4926
683.3	18.74	25.5734	19.0604	20.2741	19.4168	20.744	14.8329	13.8418	12.2222	24.4206
683.75	18.7763	25.5882	19.0877	20.28	19.3369	20.7557	14.8759	13.8139	12.2482	24.3608
684.2	18.8029	25.6113	19.1553	20.2661	19.2362	20.7614	14.862	13.8116	12.2822	24.3333
684.65	18.835	25.6844	19.1969	20.2374	19.1613	20.751	14.8422	13.7732	12.3563	24.362
685.1	18.8689	25.7549	19.2091	20.1898	19.1275	20.7366	14.8087	13.7377	12.3825	24.3834
685.55	18.8831	25.8142	19.2179	20.1419	19.1845	20.7248	14.7845	13.6917	12.381	24.3881
686	18.8949	25.842	19.1773	20.1343	19.2059	20.7007	14.8592	13.6405	12.3384	24.3553
686.45	18.8625	25.826	19.1603	20.1312	19.2257	20.702	14.9503	13.6245	12.237	24.3415
686.9	18.8449	25.8039	19.1564	20.1857	19.225	20.7158	15.0216	13.6392	12.1809	24.3412
687.35	18.8566	25.7785	19.1434	20.2439	19.2029	20.7138	15.05	13.6782	12.146	24.3564
687.8	18.8563	25.7969	19.1341	20.2733	19.2745	20.7832	15.0159	13.7269	12.1541	24.3897
688.25	18.8699	25.8442	19.1171	20.3037	19.3627	20.8296	14.9449	13.7587	12.1715	24.403
688.7	18.8555	25.8601	19.0757	20.2822	19.4696	20.8967	14.881	13.7635	12.1646	24.4018
689.15	18.7998	25.8557	19.0319	20.271	19.5441	20.9865	14.8605	13.804	12.17	24.3915
689.6	18.7473	25.7871	19.0185	20.3159	19.533	20.9723	14.8553	13.8144	12.1663	24.3697
690.05	18.7225	25.6508	19.0093	20.3589	19.4985	20.9523	14.8997	13.8291	12.2116	24.3547
690.5	18.7266	25.5885	19.0405	20.4531	19.4313	20.8958	14.9315	13.8432	12.2808	24.3319
690.95	18.7685	25.547	19.0887	20.5524	19.3863	20.8268	14.9316	13.8026	12.2943	24.3104
691.4	18.8063	25.5762	19.1183	20.5502	19.3582	20.7945	14.9263	13.7942	12.3032	24.3256
691.85	18.8235	25.7011	19.1435	20.551	19.3393	20.7826	14.8724	13.7961	12.2667	24.3321
692.3	18.8079	25.7226	19.1464	20.5037	19.3145	20.7899	14.8493	13.8187	12.2155	24.3583
692.75	18.7858	25.7514	19.1509	20.4306	19.2842	20.8067	14.8715	13.8515	12.2502	24.3739
693.2	18.7957	25.76	19.1617	20.4095	19.2699	20.8228	14.878	13.8811	12.2566	24.3428
693.65	18.8051	25.7109	19.1948	20.3166	19.2594	20.813	14.9128	13.8578	12.2771	24.3455
694.1	18.8279	25.7346	19.2134	20.2208	19.3091	20.8206	14.9394	13.8195	12.2814	24.3417
694.55	18.844	25.7445	19.2111	20.148	19.3678	20.8126	14.9069	13.7947	12.1851	24.339
695	18.8287	25.7314	19.205	20.0713	19.4037	20.8341	14.8998	13.7653	12.1483	24.3448
695.45	18.8124	25.7285	19.1955	20.134	19.4392	20.8686	14.8866	13.7917	12.1111	24.3327
695.9	18.827	25.7089	19.1757	20.2148	19.4163	20.8665	14.8684	13.8174	12.1061	24.326
696.35	18.8447	25.6779	19.1552	20.2957	19.3044	20.8891	14.8824	13.866	12.1544	24.3191
696.8	18.8712	25.6778	19.1479	20.3758	19.2236	20.8762	14.9026	13.8877	12.1469	24.3384
697.25	18.9236	25.6795	19.1077	20.3822	19.1184	20.8698	14.9313	13.8943	12.1451	24.3733
697.7	19.013	25.6685	19.1459	20.3942	19.0428	20.8694	14.9458	13.8895	12.1655	24.4019
698.15	19.0933	25.6848	19.2093	20.3949	19.1259	20.8373	14.9683	13.8307	12.2154	24.4186
698.6	19.165	25.6731	19.232	20.4187	19.1857	20.7725	14.9398	13.8115	12.3048	24.4225
699.05	19.1851	25.6662	19.2885	20.4565	19.2804	20.7176	14.8972	13.7882	12.3808	24.4073
699.5	19.0838	25.6968	19.2837	20.4833	19.3845	20.6755	14.8788	13.7123	12.3854	24.399
699.95	18.9948	25.7039	19.2972	20.5049	19.4232	20.6624	14.8531	13.6621	12.3322	24.4267
700.4	18.9212	25.7455	19.3454	20.5049	19.4747	20.7139	14.884	13.5933	12.2692	24.4529
700.85	18.8672	25.779	19.3578	20.4832	19.5183	20.7523	14.917	13.5159	12.233	24.481
701.3	18.8796	25.773	19.3835	20.4468	19.5285	20.7938	14.9366	13.5748	12.2423	24.5037
701.75	18.7986	25.7686	19.3411	20.4225	19.5229	20.7999	14.9519	13.6379	12.2788	24.5214
702.2	18.7055	25.7121	19.292	20.4001	19.5387	20.8184	14.9581	13.7154	12.293	24.6084
702.65	18.6516	25.6965	19.265	20.3924	19.5403	20.82	14.9629	13.8188	12.2606	24.6688
703.1	18.5727	25.7072	19.2318	20.3991	19.5429	20.8066	14.9716	13.8428	12.2379	24.7241
703.55	18.6787	25.7279	19.2395	20.3994	19.5573	20.8348	14.9706	13.8802	12.2239	24.7518
704	18.772	25.8104	19.2572	20.3766	19.5149	20.8276	14.963	13.8848	12.2404	24.6435
[truncated: 656 more rows]

## Sheet: 2np(100ppm)
	run1	run2	run3	run4	run6	run7	run8	run9	run10	run11
[truncated: 1,778 more rows]

[truncated: 4 more sheets: 4np(10ppm), 4np(30ppm), 4np(60ppm), 4np(100ppm)]
